# Supplementary material for: Seasonal Habitat Use by Greater Sage-Grouse (Centrocercus urophasianus) on a Landscape with Low Density Oil and Gas Development
Source: PLoS One. 2016 Oct 27;11(10):e0165399. doi: 10.1371/journal.pone.0165399 (PMC5082953; doi:10.1371/journal.pone.0165399)
Supplement: S1 Dataset — Values for variables extracted for each seasonal buffer and available buffer used to run the models in this analysis. There are tabs for breeding season, summer season, winter season, and available (7,000 for the breeding and winter season and 6,000 in the summer season were randomly selected). The columns are as follows: bird identifies the individual bird, proportion of irrigated agriculture, proportion of grassland, proportion of sagebrush, proportion of sagebrush/grassland mix, proportion of riparian, elevation (m), distance to water (km), water density (km/km2), distance to sagebrush (km), distance to agriculture (km), distance to oil/gas roads (km), distance to well pads (km), and the energy development index. (XLSX) [file pone.0165399.s003.xlsx]

## Sheet: Breeding season
bird	irrigated agriculture	grassland	sagebrush	sagebrush/grassland	riparian	elevation	distance to water	water density	distance to sagebrush	distance to agriculture	distance to oil/gas roads	distance to well pads	energy development index
1	0	0	1	0	0	8081.74	0.331801	0.855241	0	1.46031	5.93619	5.96363	0
1	0	0	1	0	0	8272.38	0.18513	1.91594	0	1.32638	8.34438	8.96752	0
1	0	0	1	0	0	8271.16	0.153289	1.92628	0	1.26463	8.32615	8.93734	0
1	0	0	0.982759	0.0172414	0	8376.01	0.0828947	1.86349	0.000442478	1.17099	9.24986	9.7085	0
1	0	0	0.9375	0.0625	0	8345.83	0.0517928	1.80017	0.0012931	1.37646	9.01505	9.58132	0
1	0	0	1	0	0	8485.65	0.150116	1.7995	0	1.89714	9.96994	10.5312	0
1	0	0.0172414	0.931034	0.0517241	0	8367.49	0.0613379	1.93708	0.00130435	1.98486	11.4017	12.7961	0
1	0	0.00877193	0.72807	0.201754	0	8271.15	0.0876914	3.0484	0.0153264	0.503408	13.2399	14.704	0
2	0	0	0.922414	0.0775862	0	8076.14	0.536985	1.33229	0.00206452	1.18692	1.05772	1.87925	0.599275
2	0	0	1	0	0	8205.59	0.40797	0.792857	0	0.783855	3.07126	3.8411	0
2	1	0	0	0	0	8134.48	0.317949	2.80912	0.406136	0	2.72454	3.71007	0
2	0	0	1	0	0	8200.2	0.507624	0.744394	0	0.912091	3.36505	4.10469	0
2	0	0	1	0	0	8213.05	0.927466	1.20233	0	1.22763	4.18964	5.01179	0
2	0	0	1	0	0	8106.44	0.265148	3.30211	0	0.691111	4.58883	5.90076	0
2	0.0789474	0.201754	0.464912	0.0350877	0.192982	8103.95	0.116154	3.52205	0.0386792	0.0793878	4.93372	6.44394	0
2	0	0	0.920354	0.079646	0	8037.49	0.062602	1.91324	0.00243363	2.77296	2.30007	2.2478	0
2	0	0	1	0	0	8181.79	0.47101	1.10841	0	0.464193	2.80774	3.74598	0
2	0	0	1	0	0	8181.79	0.47101	1.10841	0	0.464193	2.80774	3.74598	0
2	0	0	0.852174	0.0608696	0	8086.21	0.209276	1.35014	0.00409483	0.150686	3.20077	4.33052	0
2	0	0	0.965517	0	0	8138.97	0.479137	1.10478	0.000877193	0.402634	3.27438	4.26553	0
2	0	0	1	0	0	8109.3	0.072315	2.74825	0	1.00183	4.59594	5.77024	0
2	0	0	1	0	0	8108.19	0.0582093	2.8085	0	1.0227	4.63604	5.81932	0
2	0	0.0442478	0.814159	0.141593	0	8145.12	0.116708	3.51207	0.00556647	0.266085	6.48222	7.6393	0
3	0	0	0.973684	0.0263158	0	8409.57	0.341097	1.60133	0.000663717	1.1684	0.536138	1.99956	0.247479
3	0	0	0.965217	0.0347826	0	8423.22	0.56636	1.15096	0.00110619	1.01322	0.149843	1.07005	1.44218
3	0	0	1	0	0	8369.72	0.177054	1.14788	0	0.58899	0.425601	1.00722	1.51308
3	0	0	1	0	0	8447.31	0.513306	1.15358	0	1.11518	0.0783984	1.1708	1.41056
3	0	0	1	0	0	8367.41	0.477366	1.10806	0	0.674626	0.086024	0.678213	1.56752
3	0	0	0.982759	0.0172414	0	8381.31	0.434009	1.12704	0.000431034	0.785586	0.246613	0.962828	1.4992
3	0	0	0.886957	0.113043	0	8540.61	0.678903	1.06188	0.00303255	1.35296	0.0583806	1.38153	1.73211
3	0	0	1	0	0	8365.19	0.327762	1.10554	0	0.61037	0.277292	0.872745	1.54193
3	0	0	0.982301	0.0176991	0	8389.39	0.545545	1.13323	0.000434783	0.872457	0.22128	0.951488	1.49264
3	0	0	0.973684	0.0263158	0	8431.45	0.541762	1.15636	0.000657895	1.04924	0.110086	1.11665	1.42347
3	0	0	1	0	0	8396.79	0.794723	1.0888	0	0.987956	0.212928	0.769919	1.62859
3	0	0	1	0	0	8461.32	0.279725	1.06479	0	0.983377	1.25591	4.80522	0.0990806
3	0	0.301724	0.431034	0.12069	0	8185.34	0.0311261	3.18574	0.0307575	0.147545	1.62566	2.00906	0.0726521
3	0	0	1	0	0	8527.97	0.551373	1.10371	0	1.31305	0.0576214	1.32253	1.57145
3	0	0	1	0	0	8360.72	0.570003	1.21575	0	0.954757	0.204402	0.406143	1.68806
3	0	0.0775862	0.706897	0.215517	0	8506	0.779858	1.1086	0.00899748	1.27508	0.252638	1.08972	1.6297
3	0	0	1	0	0	8363.14	0.548084	1.18318	0	0.98187	0.2064	0.422472	1.69761
3	0	0	1	0	0	8379.42	0.6688	1.05354	0	1.09942	0.0838261	0.577024	1.70871
3	0	0	1	0	0	8347.03	0.178642	1.17182	0	0.417423	0.355461	0.79037	1.53493
3	0	0	1	0	0	8402.94	0.384267	1.17622	0	0.932667	0.161413	1.17314	1.37842
3	0	0.0608696	0.852174	0.0869565	0	8161.48	0.24694	2.43977	0.004198	0.391466	1.81994	4.06814	1.18818e-05
3	0.456897	0.0344828	0.318966	0.0689655	0.0862069	8130.11	0.022228	2.96709	0.0660073	0.0328553	0.985156	4.15891	0.0921439
4	0	0	0.973684	0.0263158	0	8091.91	0.285388	0.939415	0.000968029	1.31153	5.80974	5.83099	0
4	0	0	0.95614	0.0438596	0	8138.49	0.139344	1.41285	0.00110619	3.88249	7.3254	8.50722	0
4	0	0	0.982456	0.0175439	0	8226.16	0.248902	1.18373	0.000442478	4.27244	6.67993	8.21892	0
4	0	0	0.991304	0.00869565	0	8108.43	0.0543097	1.513	0.000215517	3.86868	7.29036	8.22215	0
4	0	0	1	0	0	8176.44	0.359424	1.41293	0	3.93905	7.04509	8.13075	0
4	0	0	1	0	0	8134.97	0.136652	1.45666	0	4.01394	7.22285	8.31759	0
5	0	0	0.973913	0.026087	0	8091.36	0.290178	0.933897	0.000976596	1.3193	5.81728	5.83846	0
5	0	0	0.698276	0.301724	0	8101.54	0.108604	2.06946	0.00873562	0.493417	0.0367449	0.818121	7.35466
5	0	0.0353982	0.929204	0.0353982	0	8102.77	0.128566	1.89198	0.00173195	0.940388	0.332228	1.25731	3.21843
5	0	0	0.964602	0.0353982	0	8096.47	0.0485197	2.21486	0.00109649	0.668694	0.157682	1.0354	5.5338
5	0	0.0176991	0.867257	0.115044	0	8091.65	0.0636731	1.53995	0.00263158	0.989274	0.155981	1.12828	3.57174
5	0	0.0869565	0.773913	0.113043	0	8057.11	0.0540265	1.24598	0.00553567	1.33145	0.138742	0.678971	2.75473
5	0	0.166667	0.710526	0.0526316	0.0526316	8075.03	0.0612295	1.267	0.00878936	1.17287	0.171466	0.905785	3.02683
5	0	0.0775862	0.887931	0.0344828	0	8065.93	0.0859853	1.2944	0.00230403	1.35704	0.213317	0.704611	2.2616
5	0	0	1	0	0	8089.86	0.512511	1.48185	0	0.552178	0.25636	0.750128	0.991893
5	0	0	1	0	0	8109.4	0.315657	1.33677	0	1.20756	0.361311	0.801684	1.46531
5	0	0	1	0	0	8131.51	0.487263	1.70153	0	1.34317	0.727011	1.47245	1.40689
5	0	0	1	0	0	8121.92	0.372672	2.1067	0	1.06113	0.513085	1.44068	2.01118
5	0	0	1	0	0	8144.64	0.247761	1.62325	0	1.63452	1.01041	1.62787	0.984644
5	0	0	1	0	0	8120.72	0.357339	2.10594	0	1.04699	0.501058	1.42586	2.10484
5	0	0	1	0	0	8115.97	0.303427	2.01772	0	1.03602	0.479693	1.39088	2.33411
5	0	0	1	0	0	8156.5	0.114357	1.80565	0	1.5823	0.664743	1.44233	1.08994
5	0	0	1	0	0	8101.53	0.627561	1.42094	0	0.674266	0.09375	0.638477	0.998376
6	0	0	0.982456	0.0175439	0	8106.49	0.365955	1.103	0.000748731	1.51977	0.796645	1.08655	0.773473
6	0	0	1	0	0	8320.48	0.522168	1.44081	0	0.640973	0.207543	0.185036	1.5688
6	0	0	1	0	0	8297.75	0.504406	1.42252	0	0.57149	0.381247	0.115567	1.54817
6	0	0	1	0	0	8276.35	0.513227	1.38442	0	0.650109	0.494127	0.192591	1.54437
6	0	0	1	0	0	8334.6	0.600269	1.4062	0	0.727934	0.19601	0.248885	1.58562
6	0	0	1	0	0	8237.88	0.15341	1.31971	0	0.503112	1.1383	1.01826	1.10652
6	0	0	1	0	0	8207.01	0.172427	1.38152	0.000219298	0.316348	1.24738	1.20314	0.887452
6	0	0	1	0	0	8243.03	0.241858	1.31392	0	0.36534	1.09043	0.902923	1.17101
6	0	0.00862069	0.758621	0.232759	0	8184.65	0.0576584	1.39249	0.00697197	0.203715	1.15234	1.01685	1.08341
6	0.0175439	0.0438596	0.719298	0.219298	0	8184.73	0.0531782	1.3961	0.00758685	0.141581	1.10058	0.998152	1.11833
6	0	0	1	0	0	8215.84	0.166443	1.34793	0	0.368331	1.20349	1.02493	1.08241
6	0	0	0.893805	0.106195	0	8179.38	0.0730984	1.44159	0.00359961	0.378967	1.35001	1.23042	0.819028
6	0	0	0.991379	0.00862069	0	8203.33	0.238217	1.46755	0	0.78985	1.67142	1.67352	0.159419
6	0	0	0.982609	0.0173913	0	8194.18	0.293835	1.42082	0.000438596	1.05112	2.08816	2.01778	0
6	0	0	1	0	0	8241.52	0.291761	2.09459	0	1.53108	1.14575	1.46233	0.43212
6	0	0	1	0	0	8251.44	0.285006	1.32407	0	0.324662	0.986723	0.786871	1.24681
6	0	0.0176991	0.982301	0	0	8205.22	0.224968	1.38308	0.000438596	0.41459	1.32038	1.30421	0.780849
6	0	0	0.974138	0.0258621	0	8147.59	0.120563	1.37931	0.000657895	0.958186	1.75462	1.84228	0.00178018
6	0	0	1	0	0	8281.82	0.51336	1.37004	0	0.682965	0.504912	0.199931	1.55596
6	0	0	1	0	0	8229.06	0.0850716	1.34799	0	0.575793	1.1746	1.10661	1.03852
6	0	0.0438596	0.921053	0	0	8171.76	0.070025	2.02417	0.00132743	0.369992	2.13024	2.56546	0
6	0	0.0431034	0.853448	0.103448	0	8213.09	0.121665	1.3197	0.00456764	0.912817	1.59023	2.08896	0.0370065
7	0	0.0353982	0.946903	0.0176991	0	8518.32	0.383208	1.2048	0.00111607	1.92427	1.04764	7.8393	0.0672977
7	0	0	1	0	0	8656.01	0.513135	1.03212	0	0.394351	0.245318	4.55321	0.14784
7	0	0	1	0	0	8681.14	0.0704741	1.07174	0	0.985127	0.754802	5.17629	0.115746
7	0	0.00877193	0.991228	0	0	8674.1	0.170536	1.03278	0	0.781074	0.582759	4.96653	0.109956
7	0	0.0173913	0.895652	0.0869565	0	8641.36	0.479029	0.94631	0.00217391	0.184968	0.0611037	4.39114	0.150737
7	0	0	1	0	0	8653.82	0.156831	0.772169	0	0.49423	0.119305	4.72448	0.128667
7	0	0	1	0	0	8665.16	0.226833	0.848527	0	0.688601	0.381294	4.92368	0.111771
7	0	0	1	0	0	8662.4	0.0844919	0.821832	0	1.04746	0.522845	5.27633	0.131018
7	0	0	1	0	0	8664.57	0.0717686	0.839993	0	0.910548	0.434315	5.1481	0.130211
7	0	0	0.948276	0.0517241	0	8645.93	0.366945	0.894525	0.000884956	0.244286	0.0643955	4.4763	0.150669
7	0.222222	0.0854701	0.606838	0.0854701	0	8623.02	0.444038	0.998458	0.00867298	0.0552935	0.154135	4.2437	0.150737
7	0.166667	0.0614035	0.649123	0.122807	0	8632.51	0.0597351	1.35853	0.00909314	0.0596772	0.853225	6.52357	0.100055
7	0	0	1	0	0	8464.01	0.239396	1.96549	0	1.23365	0.929255	8.86942	0.0641154
7	0	0	1	0	0	8464.01	0.239396	1.96549	0	1.23365	0.929255	8.86942	0.0641154
7	0	0	1	0	0	8640.53	0.0843273	0.807031	0	0.400857	0.117671	4.54867	0.146921
7	0	0	1	0	0	8658.41	0.0691674	0.780496	0	1.04299	0.489305	5.25585	0.131018
7	0	0	1	0	0	8663.78	0.069084	0.83196	0	0.924089	0.433385	5.15709	0.130679
7	0	0	1	0	0	8665.27	0.0730263	0.848794	0	0.900691	0.436809	5.14274	0.12974
7	0	0	1	0	0	8665.58	0.0789823	0.856739	0	0.883264	0.432955	5.12429	0.128254
7	0	0	1	0	0	8676.91	0.214871	1.01715	0	1.09043	0.786495	5.36715	0.131018
7	0	0	1	0	0	8563.34	0.125439	0.788828	0	1.03705	1.32614	6.68086	0.0230468
7	0	0	1	0	0	8658.12	0.062803	0.757461	0	0.975535	0.421796	5.18639	0.131018
7	0	0.0973451	0.840708	0.0619469	0	8447.99	0.380078	1.25854	0.0047567	1.98735	1.82329	9.04005	0
7	0.315789	0.342105	0.0263158	0.122807	0.175439	8346.85	0.0312453	3.45544	0.100434	0.0364963	0.421218	5.60047	0.168705
8	0	0.0353982	0.946903	0.0176991	0	8518.32	0.383208	1.2048	0.00111607	1.92427	1.04764	7.8393	0.0672977
8	0	0.0350877	0.964912	0	0	8564.02	0.220439	1.37807	0.000669643	1.09133	0.615477	7.13404	0.0853449
8	0	0.0598291	0.880342	0.0598291	0	8569.38	0.236964	1.35544	0.00258621	0.88976	0.38446	6.95069	0.0853449
8	0	0	1	0	0	8599.04	0.621661	0.917507	0	1.02937	0.471564	6.57053	0.0853449
8	0	0	1	0	0	8599.41	0.617882	0.902206	0	1.06521	0.505261	6.55995	0.0853449
8	0	0	1	0	0	8585.28	0.321304	0.830598	0	1.34861	0.854637	6.50042	0.0583364
8	0	0	1	0	0	8588.67	0.526966	0.88712	0	1.24898	0.683048	6.70371	0.0853449
8	0	0.0431034	0.948276	0.00862069	0	8573.65	0.314712	1.19212	0.00107759	1.03839	0.505693	6.96274	0.0853449
8	0	0	1	0	0	8592.17	0.291448	0.707869	0	1.18872	1.09761	6.2222	0.0224038
8	0	0.079646	0.902655	0	0	8600.9	0.407752	1.20566	0.00221239	0.578265	0.0942825	6.60512	0.0853449
8	0	0	1	0	0	8596.28	0.601113	0.910036	0	1.07712	0.511691	6.60343	0.0853449
8	0	0.00862069	0.991379	0	0	8570.02	0.305324	1.21706	0.000431034	1.14488	0.634317	7.08621	0.0853449
8	0	0	1	0	0	8458.33	0.272111	0.977871	0	1.49728	1.82482	9.18878	0
8	0	0	1	0	0	8386.89	0.290298	3.36351	0	0.647391	1.36126	6.86085	0.0441376
8	0	0	1	0	0	8291.22	0.214949	4.3374	0	0.221279	1.21954	4.39326	0.0579375
9	0	0	1	0	0	8067.42	0.562094	1.47022	0	1.08572	1.15573	1.95957	0.539245
9	0.0175439	0.0701754	0.842105	0.0438596	0	8267.41	0.0582549	1.01203	0.00356831	0.148906	2.22924	3.91664	0
9	0	0	1	0	0	8202.73	0.205072	1.72146	0	0.721948	1.81746	3.91634	0
9	0	0	1	0	0	8207.26	0.228709	1.69879	0	0.716713	1.82668	3.89932	0
9	0	0	1	0	0	8256.87	0.175062	1.55272	0	0.653725	2.19345	4.00228	0
9	0	0	0.973451	0.0265487	0	8287.53	0.217914	1.39016	0.000438596	0.440282	2.23822	4.00454	0
9	0	0	1	0	0	8248.18	0.0596143	1.55475	0	0.644206	2.41038	4.21311	0
9	0	0.0176991	0.964602	0.0176991	0	8303.17	0.0749289	1.22487	0.00132743	0.480874	2.53379	4.26963	0
9	0	0	0.956897	0.0431034	0	8261.56	0.0400042	1.51609	0.00107759	0.597791	2.54504	4.33729	0
10	0	0	1	0	0	8118.08	0.379076	0.998075	0	1.64677	0.654868	0.947711	0.83539
10	0.0176991	0.0707965	0.840708	0.0442478	0	8267.53	0.0605136	1.011	0.00363146	0.147787	2.22799	3.91414	0
10	0	0	1	0	0	8311.11	0.203256	1.2521	0.000217391	0.324509	2.2903	4.03471	0
10	0	0.00884956	0.973451	0.0176991	0	8300.2	0.0865144	1.26154	0.000862069	0.493014	2.51762	4.26034	0
10	0	0.0173913	0.886957	0.0956522	0	8307.46	0.0681676	1.18098	0.00280172	0.473391	2.54523	4.2733	0
11	0	0	0.991379	0.00862069	0	8085.47	0.321488	0.887287	0	1.39555	5.89166	5.91143	0
11	0	0	0.868421	0.131579	0	8227.71	0.383324	1.03071	0.00289099	1.3738	6.45774	6.53674	0
11	0	0	1	0	0	8150.86	0.381859	0.74776	0	1.5584	6.21771	6.26452	0
11	0	0	1	0	0	8149.92	0.539776	1.01456	0	1.08778	5.69139	5.73034	0
11	0	0	1	0	0	8102.42	0.5342	0.763867	0	1.38196	5.94455	5.9753	0
11	0	0	1	0	0	8130.29	0.123259	1.25509	0	0.997984	5.4815	5.50335	0
11	0	0	0.79646	0.20354	0	8142.34	0.361795	1.57849	0.00597443	0.85496	5.20662	5.2158	0
11	0	0	1	0	0	8111.82	0.421133	1.51741	0	0.946373	5.30369	5.30286	0
11	0	0	1	0	0	8099.4	0.503885	1.47002	0	1.04666	5.38049	5.3891	0
11	0	0	0.654867	0.345133	0	8246.24	0.416997	1.48612	0.0104297	1.14129	6.10605	6.1838	0
11	0.0608696	0.0608696	0.843478	0.0173913	0.0173913	7992.59	0.137484	2.74911	0.00414712	0.123979	4.87723	4.9627	0
11	0.19469	0.0442478	0.743363	0	0.0176991	7990.86	0.102802	2.34663	0.0115971	0.0877198	4.66314	4.70747	0
11	0	0	0.133929	0.866071	0	8092.55	0.346234	0.945919	0.0510732	1.97566	1.57472	1.54842	0.139513
11	0	0	0.947826	0.0521739	0	8120.64	0.436724	1.70222	0.00109649	0.617542	5.09106	5.1153	0
11	0.301724	0.0775862	0.534483	0.0862069	0	7979.95	0.0855097	2.47868	0.0252387	0.0654794	4.41753	4.44192	0
11	0	0	0.973684	0.0263158	0	8113.62	0.45	1.71187	0.000646552	0.602264	5.06844	5.09207	0
11	0	0	0.938596	0.0614035	0	8124.58	0.433322	1.69244	0.0012931	0.630056	5.09588	5.12015	0
11	0	0	0.938596	0.0614035	0	8124.58	0.433322	1.69244	0.0012931	0.630056	5.09588	5.12015	0
11	0.0431034	0.0344828	0.905172	0.00862069	0.00862069	7996.34	0.148026	2.53178	0.00317916	0.13055	4.83016	4.90043	0
11	0	0	0.938596	0.0614035	0	8126.39	0.425405	1.69026	0.0012931	0.633857	5.10453	5.12833	0
11	0	0	1	0	0	8107.64	0.241821	2.33809	0	0.328011	3.66401	3.84789	0
12	0	0	1	0	0	8079.56	0.334627	0.83563	0	1.5069	5.9556	5.99847	0
13	0	0	1	0	0	8061.68	0.452742	1.69083	0	1.05337	1.20062	1.90806	0.482698
13	0	0	1	0	0	8022.73	0.173447	2.13037	0	0.363523	2.11636	2.93259	0
13	0	0	1	0	0	8100	0.59133	1.04543	0	1.47153	1.63473	1.83803	0.0997982
13	0	0	0.561404	0.438596	0	8395.94	0.286793	1.5524	0.0161316	0.567846	1.68842	5.84789	0.00329834
13	0	0	1	0	0	8332.04	0.350987	1.56169	0	0.430375	1.70932	5.35939	0.0026325
13	0	0	0.577586	0.422414	0	8402.5	0.304317	1.53459	0.0155058	0.601062	1.671	5.88458	0.00435731
13	0	0.0353982	0.415929	0.548673	0	8367.16	0.353139	1.40293	0.0176005	0.720896	1.54078	5.9017	0.0168503
13	0	0	0.789474	0.210526	0	8329.52	0.273313	1.3423	0.00622692	0.67614	1.43079	5.60129	0.0333846
13	0	0.0442478	0.893805	0.0619469	0	8279.11	0.0678641	1.27845	0.00215517	0.907379	1.19847	5.53845	0.0652495
13	0	0.0172414	0.896552	0.0862069	0	8288.59	0.0867871	1.25553	0.00294171	0.917282	1.19507	5.60624	0.0638245
13	0	0.0434783	0.878261	0.0782609	0	8502.78	0.156499	1.60928	0.00241228	0.666889	1.84414	6.07564	0
13	0	0.0603448	0.698276	0.241379	0	8496.91	0.191462	1.50131	0.0107513	0.813238	1.75456	6.16805	0.000657749
13	0	0.103448	0.655172	0.0517241	0	8542.49	0.0771068	1.69829	0.0110031	0.801216	2.27361	6.31462	0
13	0	0.191304	0.556522	0.252174	0	8338.38	0.220901	1.24869	0.0181214	0.877496	1.3178	5.84254	0.0444335
13	0	0.00862069	0.956897	0.0344828	0	8466.75	0.150112	1.65329	0.000669643	0.549829	1.8336	5.94427	0
14	0	0	0.859649	0.140351	0	8005.99	0.0752171	2.85971	0.0047044	0.405937	1.90525	2.17415	0
14	0	0	0.982759	0.0172414	0	8197.99	0.745361	0.5962	0.000438596	1.79274	0.473279	1.54779	1.94428
14	0.0265487	0.0619469	0.752212	0.0353982	0.079646	7992.97	0.0909321	3.06467	0.0110455	0.123433	1.83855	2.56703	0
14	0	0	1	0	0	8024.7	0.172001	2.55856	0	0.657276	1.65194	1.91555	0.0321537
14	0	0	0.726496	0.273504	0	7996.63	0.0585679	3.00576	0.00838351	0.252623	1.93175	2.37059	0
14	0	0.0172414	0.905172	0.0603448	0	7995.83	0.104988	3.05443	0.00206452	0.175794	1.86732	2.49504	0
14	0.13913	0.0695652	0.547826	0.0434783	0.156522	7988.69	0.0645981	3.06206	0.0263591	0.0834632	1.82133	2.62066	1.1099e-05
14	0	0	0.929825	0.0701754	0	8001.89	0.118035	2.98753	0.00254923	0.271168	1.94971	2.38502	0
14	0	0.0431034	0.905172	0.00862069	0.00862069	7995.52	0.109337	3.05305	0.00267548	0.164704	1.86507	2.51161	0
14	0	0	0.508772	0.491228	0	8000.92	0.133473	2.98787	0.0181221	0.230587	1.92612	2.31499	0
14	0	0	1	0	0	8005.48	0.146153	2.93767	0	0.329388	1.96669	2.33905	0
14	0	0	0.342105	0.657895	0	7992.71	0.0953235	3.05393	0.0230816	0.174633	1.87582	2.39759	0
14	0	0	0.869565	0.130435	0	8000.39	0.0839244	2.97771	0.00396579	0.28883	1.95037	2.35676	0
14	0	0	0.99115	0.00884956	0	8002.89	0.139151	2.98245	0.000652174	0.266151	1.95001	2.40071	0
14	0	0	1	0	0	8008.91	0.231235	2.85766	0	0.405905	1.93831	2.28728	0
14	0	0	1	0	0	8006.91	0.157236	2.90826	0	0.364837	1.96249	2.30231	0
14	0	0	0.99115	0.00884956	0	8002.89	0.139151	2.98245	0.000652174	0.266151	1.95001	2.40071	0
14	0	0	0.946903	0.0530973	0	8003.37	0.102061	2.94882	0.00159789	0.322121	1.96177	2.32787	0
14	0	0	0.895652	0.104348	0	8001.18	0.0892233	2.97888	0.00319578	0.288171	1.95142	2.35668	0
14	0	0	0.946429	0.0535714	0	8002.55	0.0810605	2.93747	0.00181341	0.333443	1.96034	2.30656	0
14	0	0	0.948276	0.0517241	0	8003.2	0.092713	2.9361	0.00164031	0.337113	1.9614	2.30719	0
14	0	0	0.948276	0.0517241	0	8003.2	0.092713	2.9361	0.00164031	0.337113	1.9614	2.30719	0
14	0	0	0.931034	0.0689655	0	8002.19	0.0810985	2.94178	0.00182918	0.32778	1.95993	2.31257	0
14	0	0	1	0	0	8006.7	0.15865	2.91548	0	0.355318	1.96556	2.31878	0
14	0	0	1	0	0	8006.95	0.165355	2.91185	0	0.360054	1.96394	2.3118	0
14	0	0	1	0	0	8006.68	0.15865	2.91986	0	0.353513	1.96556	2.31878	0
15	0	0	1	0	0	8391.4	0.431191	1.7032	0	0.7385	1.06936	2.21292	0.145571
15	0	0	1	0	0	8367.15	0.287517	1.10968	0	0.598694	0.317214	0.899175	1.53787
15	0	0	1	0	0	8359.42	0.406703	1.10897	0	0.623027	0.146482	0.736458	1.55902
15	0	0	0.930435	0.0695652	0	8340.68	0.0630032	1.20653	0.00154867	0.457481	0.564455	1.01855	1.49465
15	0	0	0.974138	0.0258621	0	8347.06	0.0677187	1.21163	0.000652174	0.514434	0.551062	1.05348	1.48932
15	0	0	1	0	0	8396.65	0.280725	1.27205	0	0.962369	0.230571	1.28965	1.32757
15	0	0	1	0	0	8362.84	0.454894	1.09544	0	0.671348	0.135947	0.754687	1.55909
15	0	0	1	0	0	8152.37	0.178401	2.87342	0	0.330626	0.690557	6.74275	0.367441
15	0	0	1	0	0	8425.7	0.506571	2.05461	0	0.514348	2.32321	4.3112	0
15	0	0	1	0	0	8422.77	0.331267	2.28026	0	0.333163	2.52603	4.54443	0
15	0	0	1	0	0	8399.59	0.708297	1.30955	0	0.760696	1.51116	3.09274	0.0596204
15	0	0	1	0	0	8402.97	0.662654	1.33443	0	0.79467	1.52883	3.2848	0.0398208
15	0	0	1	0	0	8367.42	0.245604	1.56858	0	0.570919	0.368204	1.42449	1.03642
15	0	0.121739	0.8	0.0782609	0	8324.94	0.0639457	1.4229	0.00581943	0.171683	0.562508	1.06785	1.43813
15	0	0	0.922414	0.0775862	0	8344.87	0.101215	1.16962	0.00219298	0.419914	0.46668	0.900166	1.51749
15	0	0	0.929204	0.0707965	0	8346.99	0.102664	1.16649	0.00172414	0.435228	0.471178	0.917282	1.5169
15	0	0	1	0	0	8387.8	0.301244	1.16676	0	0.766277	0.304382	1.07874	1.46394
15	0	0.00869565	0.965217	0.026087	0	8328.81	0.491459	1.45062	0.000646552	0.718291	0.903096	2.67516	0.132786
16	0	0	0.965517	0.0344828	0	8072.19	0.48457	1.45438	0.000862069	1.15473	1.09088	1.86026	0.568479
16	0	0	1	0	0	8222.04	0.119545	0.770006	0	2.53835	5.55532	8.38293	0
16	0	0	1	0	0	8229.47	0.399267	0.731671	0	2.74429	6.13442	8.23899	0
16	0	0	1	0	0	8226.63	0.395465	0.722301	0	2.71481	6.12757	8.23439	0
16	0	0	1	0	0	8202.58	0.258697	0.97587	0	3.2026	5.71022	8.09101	0
16	0	0	1	0	0	8213.11	0.444588	0.759171	0	2.78421	6.23902	8.13868	0
16	0	0.104348	0	0	0.026087	8117.34	0.165186	3.43017	0.318991	0.993478	2.13361	6.31624	0
17	0	0	1	0	0	8061.81	0.417216	1.7294	0	1.05683	1.19881	1.88159	0.476087
17	0	0	0.904348	0.0869565	0	8135.6	0.439946	2.42635	0.00176991	0.781368	1.54869	1.85892	0.0295786
17	0	0	0.947368	0.0526316	0	8050.21	0.23083	2.92012	0.00109649	0.309259	1.98678	2.17241	0
17	0	0	1	0	0	8059.43	0.332451	2.91093	0	0.38596	1.94125	2.16883	0
17	0	0	0.964912	0.0350877	0	8144.51	0.626011	2.28879	0.000431034	0.895243	1.4571	1.88279	0.0473622
17	0	0	1	0	0	8135.19	0.633803	2.49107	0	0.816457	1.54677	1.97028	0.020848
17	0	0	0.955752	0.0353982	0	8050.67	0.184067	2.56458	0.000877193	0.591071	1.71	1.8882	0.00441408
17	0	0	1	0	0	8084	0.399623	2.77817	0	0.563271	1.76916	2.04147	0.000623951
17	0	0.0431034	0.887931	0.0603448	0	8129.07	0.643683	1.9884	0.00217391	1.0369	1.30612	1.74544	0.147174
17	0	0	0.991071	0.00892857	0	8139.82	0.669747	2.21449	0.000219298	0.936412	1.42998	1.88316	0.053628
17	0	0.00877193	0.894737	0.0964912	0	8090.13	0.489748	1.64701	0.00254923	1.14694	1.16748	1.48475	0.370015
18	0	0	0.974138	0.0258621	0	8105.65	0.373301	1.15665	0.000442478	1.47607	0.81483	1.09417	0.749556
18	0	0	1	0	0	8149.34	0.522049	1.04781	0	0.686937	0.242531	5.17905	0.40477
18	0	0	1	0	0	8143.18	0.629545	1.06948	0	0.325062	0.0978448	5.47978	0.424591
18	0	0	1	0	0	8165.47	0.792571	0.917614	0	0.427074	0.0502655	5.52801	0.420976
18	0	0	1	0	0	8159.26	0.778393	1.00283	0	0.383595	0.0653587	5.55904	0.424845
18	0	0	1	0	0	8163.83	0.796862	0.942875	0	0.438674	0.0468335	5.52357	0.422651
18	0	0	1	0	0	8142.98	0.656843	1.13261	0	0.377216	0.0712719	5.44764	0.423968
18	0	0	1	0	0	8165.03	0.792348	0.934443	0	0.417396	0.057639	5.54628	0.422892
18	0	0	1	0	0	8139.98	0.623174	1.1322	0	0.363277	0.08125	5.42349	0.423195
18	0	0	0.991379	0.00862069	0	8128.35	0.460216	1.00046	0	0.213069	0.221053	5.40242	0.421919
19	0	0	0.982759	0.0172414	0	8072.48	0.34364	1.44918	0.000646552	1.22829	1.02695	1.71187	0.635435
19	0	0	0.798246	0.201754	0	8270.07	0.117004	1.56679	0.00500623	2.18986	0.279034	0.437599	2.07278
19	0	0	0.938053	0.0619469	0	8293.78	0.207263	1.5335	0.00181341	2.33063	0.136535	0.635516	2.40049
19	0.00862069	0.310345	0.405172	0.0603448	0.00862069	8160.06	0.0437603	3.20916	0.0224071	0.120928	0.205535	0.395798	0.30813
19	0	0	1	0	0	8200.25	0.295047	2.69665	0	1.38177	0.690656	0.990196	1.08481
19	0	0	0.973451	0.0265487	0	8155.04	0.371587	1.44591	0.000446429	2.9949	0.0503498	0.439555	3.70305
19	0	0	0.893805	0.106195	0	8287.16	0.107093	1.57903	0.00254923	2.39235	0.0610302	0.46047	2.48765
19	0	0	0.824561	0.175439	0	8255.04	0.0560103	1.54942	0.00549804	2.22562	0.279997	0.381237	2.05983
19	0	0	0.713043	0.26087	0	8200.13	0.114043	1.45064	0.00923593	2.66481	0.308107	0.119431	2.59875
19	0	0	0.9375	0.0625	0	8248.92	0.0440435	1.57215	0.00110619	2.33624	0.259369	0.281589	2.31939
19	0	0	0.715517	0.258621	0	8225.01	0.0929331	1.53339	0.00914588	2.48979	0.302673	0.135011	2.43363
19	0	0	0.938596	0.0614035	0	8248.03	0.044222	1.56998	0.00108696	2.34001	0.260754	0.280496	2.31856
20	0	0	0.920354	0.0530973	0	8100	0.353111	1.15427	0.00171676	1.48796	0.833736	1.1263	0.756754
20	0	0	0.973451	0.0265487	0	8061.25	0.111598	1.15724	0.000446429	1.40887	0.823446	1.02895	0.663502
20	0	0	1	0	0	8120.62	0.367271	0.994451	0	1.7812	0.522557	0.825212	0.901836
20	0	0	1	0	0	8086.89	0.185128	1.03085	0	1.60337	0.636323	0.864051	0.742725
20	0	0	0.964912	0.0350877	0	8061.69	0.121632	1.18705	0.000657895	1.38349	0.849026	1.0579	0.656022
20	0	0	0.858407	0.141593	0	8036	0.257724	3.26603	0.00350877	0.244381	2.09145	2.43641	0
20	0.403509	0.0438596	0.45614	0.0263158	0.0263158	8018.89	0.0481719	3.46953	0.0403164	0.04899	2.15906	2.89422	0
20	0	0	0.982609	0.0173913	0	8059.1	0.088578	1.14573	0.000431034	1.41953	0.818642	1.01598	0.658951
20	0.858407	0.00884956	0.0530973	0.0176991	0.0265487	7999.5	0.0228418	3.49767	0.130505	0.00515645	2.11288	3.02157	0
20	0.939655	0	0	0.00862069	0.0431034	7995.97	0.0213891	3.51326	0.183559	0.00150862	2.06639	3.07743	0
21	0	0	0.947368	0.0526316	0	8178.8	0.136664	2.78722	0.00107759	0.30058	2.03508	2.92207	0
21	0	0	0.885965	0.114035	0	8358.59	0.455937	1.53374	0.00230403	0.531979	1.12563	1.68377	0.283193
21	0	0.0172414	0.577586	0.405172	0	8358.78	0.511197	1.44032	0.0192826	0.573681	1.04984	1.66295	0.309306
21	0	0	0.371681	0.628319	0	8365.77	0.582384	1.32906	0.0314393	0.679534	0.893492	1.65139	0.31296
21	0	0	0.568966	0.431034	0	8419.2	0.592323	1.20991	0.0201398	0.669954	0.994071	1.55564	0.493714
21	0	0	0.513043	0.486957	0	8468.46	0.64544	1.07867	0.0184409	0.737853	0.957566	1.48663	0.585616
21	0	0	0.586207	0.413793	0	8384.84	0.626758	1.2931	0.015193	0.757355	0.80975	1.64391	0.32022
21	0	0	0.814159	0.185841	0	8406.22	0.668865	1.26988	0.00540325	0.816853	0.748116	1.63368	0.334168
21	0	0	0.431034	0.568966	0	8565.19	0.770754	0.909075	0.0203188	0.862301	0.845915	1.36555	0.718133
21	0	0	0.40708	0.59292	0	8518.54	0.772322	0.899486	0.0214323	0.846717	0.812103	1.40862	0.651761
21	0.380531	0.115044	0.256637	0.19469	0	8119.28	0.041669	3.06622	0.0548658	0.0443323	3.16077	3.70822	0
21	1	0	0	0	0	8114.35	0.346488	2.93319	0.0524715	0	2.85571	3.92466	0
21	0	0	0.382609	0.617391	0	8481.01	0.706378	1.00169	0.0252638	0.778019	0.879775	1.46015	0.604684
21	0.974138	0	0.0258621	0	0	8116.08	0.309686	2.94595	0.0402969	0.000646552	2.80805	3.88694	0
21	0.827586	0.00862069	0.155172	0	0	8120.04	0.212866	2.91542	0.0172311	0.00522471	2.69646	3.8027	0
21	0	0	0.947826	0.0521739	0	8336.63	0.378143	1.68046	0.00130435	0.46675	1.20725	1.74567	0.21151
21	0	0	0.359649	0.640351	0	8481.1	0.716806	0.975119	0.0272939	0.79209	0.86675	1.45505	0.608477
21	0	0.0434783	0.669565	0.286957	0	8705.48	0.791166	1.1208	0.0113148	0.751127	0.832188	1.23498	1.23519
21	0	0	0.517241	0.482759	0	8600.57	0.863739	0.821269	0.0195043	0.9452	0.741562	1.31186	0.766291
21	0	0.026087	0.747826	0.226087	0	8340.06	0.359601	1.63203	0.00778642	0.531298	1.25541	1.6946	0.282852
21	0	0.0258621	0.706897	0.267241	0	8341.02	0.358284	1.61472	0.00946591	0.538583	1.26165	1.68738	0.298318
21	0	0.0707965	0.619469	0.292035	0	8200.41	0.146034	2.42786	0.0140887	0.175175	1.4129	2.06358	0.145295
21	0.353448	0.0172414	0.172414	0.00862069	0	8117.02	0.0399	3.09964	0.0383709	0.0471952	2.67982	3.61429	0
22	0.0172414	0.163793	0.586207	0.0172414	0	8175.54	0.103583	2.52952	0.0211433	0.154589	1.8604	2.8645	0
22	0	0.0517241	0.137931	0.793103	0.0172414	8387.14	0.508142	1.87465	0.055112	0.359908	1.175	1.53363	0.760422
22	0	0	0.973451	0.0265487	0	8248.26	0.195093	2.06136	0.000438596	0.421889	1.43284	1.82912	0.147935
22	0	0.0438596	0.675439	0.280702	0	8289.27	0.296791	1.94281	0.01782	0.401078	1.3364	1.72715	0.24606
22	0	0.0173913	0.356522	0.591304	0	8530.42	0.592684	1.94372	0.0214267	0.449721	1.10392	1.37067	1.3996
22	0	0.0535714	0.178571	0.767857	0	8363.72	0.441509	1.68332	0.0587141	0.452597	1.19188	1.58138	0.531872
22	0	0.131579	0.27193	0.596491	0	8285.64	0.374093	2.1709	0.0418516	0.226123	1.32507	1.67377	0.371417
22	0	0.0603448	0.293103	0.646552	0	8301.01	0.384205	2.04431	0.0456382	0.294436	1.29045	1.65718	0.394826
23	0.0176991	0.19469	0.566372	0.0176991	0	8172.81	0.0958411	2.54557	0.0223863	0.144864	1.85401	2.84504	0
23	0	0.0869565	0.617391	0.295652	0	8371.32	0.18769	2.61433	0.0135962	0.274548	5.00808	7.20918	0
23	0	0.333333	0.570175	0.0964912	0	8308.14	0.175725	2.79071	0.0130072	0.170395	4.55138	6.32072	0
23	0	0	1	0	0	8291.69	0.251295	2.24764	0	0.295053	3.92422	5.24968	0
23	0.0956522	0.0956522	0.695652	0.113043	0	8240.65	0.206095	2.03213	0.0128723	0.101736	3.51429	4.97222	0
23	0.147826	0.408696	0.165217	0.278261	0	8305.95	0.0965466	2.85266	0.0380543	0.0795944	4.39546	6.10929	0
23	0.263158	0.236842	0.280702	0.219298	0	8301.11	0.123704	2.69756	0.0417019	0.0560224	4.56121	6.21393	0
23	0.12069	0.439655	0.206897	0.232759	0	8307.64	0.12815	2.81485	0.0357177	0.0934667	4.44257	6.15034	0
23	0	0.353448	0.551724	0.0948276	0	8308.52	0.181358	2.80006	0.0133693	0.175559	4.53306	6.29911	0
23	0.0869565	0.0695652	0.626087	0.121739	0.0695652	8173.96	0.0724983	1.78589	0.0262825	0.087928	4.02252	5.76149	0
23	0.434783	0.0521739	0.286957	0.226087	0	8309.59	0.208013	3.00851	0.0487891	0.0287684	3.84666	6.11135	0
23	0.495575	0.0265487	0.19469	0.283186	0	8313	0.25421	3.03117	0.0611771	0.0207912	3.78687	6.05752	0
23	0.508772	0.0877193	0.350877	0.0350877	0.0175439	8280.66	0.0627983	2.94261	0.0436814	0.0252161	3.94885	6.17565	0
23	0.344828	0.0948276	0.405172	0.155172	0	8296.3	0.114051	2.96406	0.0251545	0.0371886	3.92112	6.16668	0
23	0	0	1	0	0	8270.13	0.170248	2.25232	0	0.203827	4.07381	5.57996	0
23	0	0	0.973913	0.026087	0	8188.82	0.0598911	1.24853	0.000431034	0.338826	4.8089	6.46356	0
23	0	0	1	0	0	8218.92	0.1868	1.3048	0	0.473458	4.64255	6.27219	0
23	0	0	0.973684	0.0263158	0	8189.07	0.0646691	1.22882	0.000221239	0.42437	4.79327	6.4191	0
23	0.0350877	0.0789474	0.815789	0.0526316	0.0175439	8211.1	0.181558	1.75998	0.00500623	0.100014	3.65736	5.39931	0
24	0	0	1	0	0	8186.04	0.0569459	1.04099	0	2.66077	5.23743	5.67306	0
24	0	0	1	0	0	8181.57	0.235794	3.25449	0	0.513781	9.33959	10.2191	0
24	0	0	1	0	0	8181.09	0.305578	3.04597	0	0.632194	9.5612	10.3969	0
24	0	0	0.824561	0.175439	0	8428.51	0.212558	2.06122	0.00500919	2.02588	11.424	13.1109	0
24	0	0.0172414	0.431034	0.5	0	8365.49	0.12072	2.27762	0.031544	1.47813	12.0638	13.5841	0
24	0	0	0.982609	0.0173913	0	8448.87	0.0858888	1.95797	0.000657895	2.05969	11.1499	12.9789	0
24	0	0.00862069	0.913793	0.0689655	0	8285.87	0.237802	2.71073	0.00202893	0.976785	12.5639	13.797	0
24	0	0	1	0	0	8435.1	0.386564	2.12595	0	1.86078	11.518	13.3077	0
24	0	0	0.827586	0.172414	0	8426.39	0.243027	2.07327	0.00500919	1.99411	11.4616	13.1333	0
24	0	0.0446429	0.607143	0.196429	0	8262.92	0.208802	2.88183	0.0107612	0.427013	13.1579	14.131	0
24	0	0.0173913	0.704348	0.26087	0	8279.98	0.287171	2.49505	0.00791408	1.0083	12.436	13.4781	0
24	0	0.0176991	0.59292	0.221239	0	8268.21	0.0716763	3.02271	0.0231664	0.531434	13.2113	14.6915	0
24	0	0.0964912	0.578947	0.192982	0	8310.18	0.0774504	3.17458	0.0177239	0.182312	13.0877	14.9844	0
24	0	0	0.982759	0.0172414	0	8450.29	0.061244	1.87659	0.000438596	1.49765	11.1963	13.6924	0
24	0	0	0.912281	0.0877193	0	8466.35	0.183359	1.9087	0.00230403	1.94117	10.9782	12.8849	0
24	0	0	0.938053	0.0619469	0	8446.84	0.249993	1.80056	0.00165496	2.01757	10.9141	12.7314	0
24	0	0	0.318966	0.681034	0	8487.95	0.158516	1.89397	0.0405279	1.62575	10.6367	12.7964	0
25	0	0	1	0	0	8389.7	0.381333	1.72809	0	0.680359	1.14334	2.24292	0.134097
25	0	0	0.814159	0.159292	0	8283.26	0.233502	1.68329	0.00452586	0.375555	0.0860234	0.342761	1.32469
25	0	0	0.853448	0.137931	0	8338.32	0.283516	1.64327	0.00313352	0.810537	0.595239	1.10547	1.15931
25	0	0	0.911504	0.0265487	0	8332.78	0.326532	1.63041	0.00221239	0.570293	0.403962	1.15142	1.13963
25	0	0	0.732759	0.103448	0	8344.36	0.28619	1.61303	0.0112857	0.890974	0.734907	1.15119	1.1251
25	0	0	0.758621	0.198276	0	8315.1	0.237503	1.66295	0.00588343	0.776666	0.495779	1.03217	1.20008
25	0	0	0.896552	0.0431034	0	8329.37	0.339836	1.63134	0.00307018	0.579932	0.419611	1.15651	1.13457
25	0	0	0.904348	0.0695652	0	8342.88	0.27631	1.62868	0.00215517	0.86041	0.668193	1.12021	1.14449
25	0	0	0.896552	0.0948276	0	8340.13	0.261523	1.64154	0.00204657	0.83411	0.626988	1.09662	1.1584
25	0	0	0.773913	0.182609	0	8310.82	0.193518	1.66318	0.00522553	0.798868	0.535189	1.01033	1.20202
25	0	0	0.859649	0.105263	0	8220.31	0.0615537	1.6712	0.00381891	0.683154	0.398849	0.83521	1.26049
25	0	0.0265487	0.973451	0	0	8294.29	0.386356	1.58992	0.000657895	0.480802	0.521567	1.28592	1.01047
25	0	0	0.836207	0.12069	0	8229.29	0.0768316	1.67348	0.00400309	0.709649	0.404762	0.857254	1.25773
25	0	0	0.655172	0.318966	0	8219.22	0.121228	1.50009	0.0110397	2.55962	0.310649	0.107091	2.50124
25	0	0	0.844828	0.146552	0	8333.57	0.313703	1.64174	0.0040382	0.775973	0.581043	1.12635	1.1519
25	0	0.00884956	0.778761	0.132743	0	8347.77	0.136439	1.56379	0.00500623	0.33915	0.55016	1.42999	0.841891
25	0	0	1	0	0	8159.86	0.226074	3.04334	0	0.27349	1.40209	3.52222	0.0802933
25	0	0.00869565	0.913043	0.0434783	0	8238.32	0.158666	1.67883	0.00178571	0.730592	0.318235	0.902393	1.2665
25	0	0	0.849558	0.123894	0	8224.39	0.0837356	1.67543	0.0041841	0.713711	0.372588	0.850699	1.26472
25	0	0	0.827586	0.12931	0	8242.82	0.0868503	1.67128	0.00429518	0.718953	0.463452	0.894316	1.24233
25	0	0	0.843478	0.0173913	0	8325.27	0.229061	1.63488	0.00554206	0.542181	0.316151	1.12348	1.17075
25	0	0	0.982456	0.0175439	0	8224.47	0.363424	1.39928	0.000215517	0.53961	0.882211	1.59827	0.509915
26	0.0442478	0	0.911504	0.0442478	0	8163.57	0.117728	3.27016	0.00228382	0.136452	2.61685	3.20791	0
26	0	0.140351	0.298246	0.561404	0	8587.26	0.68922	1.41837	0.0292032	0.577531	0.961707	1.33664	1.15914
26	0	0.079646	0.522124	0.39823	0	8678.7	0.758794	1.19563	0.0189178	0.702816	0.868192	1.26392	1.20228
26	0	0.0608696	0.217391	0.695652	0.00869565	8384.45	0.505059	2.05186	0.0387821	0.299502	1.21827	1.53567	0.864365
26	0	0.0438596	0.201754	0.710526	0.0175439	8411.13	0.539938	1.95589	0.0412149	0.339376	1.17393	1.50396	0.931683
26	0	0.0173913	0.252174	0.686957	0.0173913	8449.96	0.56555	1.97675	0.0317284	0.363752	1.1563	1.46103	1.10319
26	0	0.026087	0.226087	0.678261	0.0173913	8500.7	0.644938	1.72187	0.0333869	0.452984	1.05496	1.39622	1.17302
27	0.00877193	0	0.938596	0.0438596	0	8165.87	0.129174	3.26401	0.0015625	0.15184	2.61017	3.17528	0
27	0	0	0.575221	0.424779	0	8538.1	0.637074	1.09011	0.0135962	0.747432	0.991135	1.42226	0.720246
27	0	0	0.330435	0.669565	0	8704.33	0.854527	0.884776	0.0364662	0.931352	0.782131	1.22727	1.03332
27	0	0	0.6	0.4	0	8726.71	0.844475	0.950831	0.0185878	0.877282	0.78476	1.21017	1.15908
27	0	0.0854701	0.273504	0.632479	0.00854701	8539.33	0.64778	1.52183	0.0336464	0.52288	1.01026	1.38158	1.08491
27	0	0.105263	0.263158	0.631579	0	8535.52	0.637033	1.48797	0.0417967	0.534341	1.01122	1.38852	1.03389
27	0	0.0948276	0.232759	0.672414	0	8514.43	0.615381	1.51517	0.0443083	0.519726	1.03252	1.41031	0.981486
27	0	0.0973451	0.256637	0.646018	0	8527.17	0.62837	1.51891	0.041164	0.518611	1.02445	1.39905	1.02429
27	0	0.106195	0.238938	0.654867	0	8519.36	0.615779	1.50118	0.0457191	0.527992	1.03009	1.40914	0.976442
27	0.140351	0.263158	0.157895	0.394737	0.0438596	8208.01	0.148152	2.58808	0.0652129	0.0674795	0.700599	0.838408	2.79888
27	0.586207	0.215517	0.0172414	0.0775862	0.0862069	8183.32	0.0670981	2.9155	0.102687	0.0137225	0.325619	0.489468	3.25161
28	0	0.0689655	0.689655	0	0	8171.48	0.0969116	3.21091	0.0130608	0.2189	2.46684	2.98417	0
28	0.0172414	0.0258621	0.681034	0.198276	0	8206.78	0.158351	2.70645	0.00904255	0.0918994	1.5737	1.87914	0.082789
28	0.0172414	0.00862069	0.75	0.163793	0	8205.58	0.145968	2.73847	0.00715725	0.0981522	1.57363	1.89059	0.0801359
28	0	0	0.460177	0.539823	0	8291.42	0.213748	2.58354	0.0245035	0.231284	1.35049	1.65515	0.549254
28	0	0	0.508621	0.491379	0	8418.7	0.386135	2.2752	0.0267186	0.35283	1.2507	1.48843	1.20887
28	0	0	0.612069	0.387931	0	8253.39	0.21193	2.62905	0.0180281	0.190306	1.43285	1.73734	0.285913
28	0	0	0.465517	0.534483	0	8484.21	0.468949	2.13438	0.0183112	0.407803	1.19208	1.42331	1.36806
28	0	0	0.491379	0.508621	0	8416.31	0.366164	2.29292	0.0230353	0.353755	1.23638	1.47619	1.26012
28	0	0.0521739	0.6	0.286957	0	8467.57	0.436232	2.4292	0.0168278	0.41792	0.85888	1.17906	2.8064
28	0	0	0.886957	0.113043	0	8154.9	0.318899	1.21888	0.00245996	2.50659	7.97207	8.23332	0
28	0	0.147826	0.504348	0.0434783	0	8189.1	0.170894	3.25544	0.016457	0.175894	1.40493	2.14558	0.0903163
28	0.00862069	0.112069	0.586207	0.189655	0.0431034	8161.29	0.134266	3.3172	0.013493	0.118943	1.37808	2.22343	0.0896121
28	0	0.106195	0.59292	0.176991	0.0353982	8160.02	0.128977	3.32358	0.0127408	0.126444	1.39963	2.24757	0.0786788
28	0	0.106195	0.59292	0.176991	0.0353982	8160.02	0.128977	3.32358	0.0127408	0.126444	1.39963	2.24757	0.0786788
29	0.0176991	0.0619469	0.504425	0.079646	0	8176.2	0.0799965	3.43936	0.0174456	0.154447	2.64739	3.09155	0
29	0.0782609	0.121739	0.713043	0.0695652	0	8307.51	0.138118	1.7922	0.0160628	0.0991824	0.621625	1.49926	1.4864
29	0.0357143	0.107143	0.589286	0.267857	0	8302.27	0.123987	1.87276	0.0215191	0.114311	0.74864	1.72311	0.973489
29	0.0263158	0.0526316	0.815789	0.105263	0	8305	0.120941	1.79332	0.0059352	0.108671	0.639118	1.56405	1.28613
29	0	0	0.844828	0.155172	0	8310.24	0.256574	1.94397	0.00474531	0.259834	0.738791	1.63739	0.895779
29	0	0.00884956	0.893805	0.0973451	0	8314.13	0.303831	1.96237	0.00344828	0.289244	0.67046	1.59449	0.935562
29	0	0	0.991304	0.00869565	0	8324.51	0.360396	1.79499	0.000219298	0.376988	0.383624	1.60613	1.05541
29	0.0173913	0.104348	0.504348	0.373913	0	8308.89	0.134872	2.14107	0.0164018	0.156068	0.746269	1.41981	0.922693
29	0.286957	0.121739	0.4	0.173913	0	8293.91	0.0580252	2.05584	0.0390609	0.0663317	0.864335	1.53787	0.917763
29	0	0.0175439	0.701754	0.280702	0	8309.17	0.200835	2.05599	0.0102835	0.220176	0.749715	1.54108	0.923529
29	0	0	0.824561	0.175439	0	8331.42	0.322527	1.75242	0.00496861	0.463129	2.11937	2.86615	0
29	0	0	0.9375	0.0625	0	8312.44	0.30337	1.91868	0.00154867	0.279164	0.687357	1.63601	0.912953
29	0	0	0.810345	0.189655	0	8323.17	0.374365	1.97655	0.00501545	0.368514	0.514404	1.48611	1.03258
29	0	0	0.86087	0.13913	0	8313.5	0.316777	1.76887	0.00458178	0.193577	0.616158	1.75329	0.884177
29	0	0	0.894737	0.105263	0	8314.8	0.332741	1.76489	0.00334268	0.20855	0.596052	1.73716	0.893472
29	0	0	0.904348	0.0956522	0	8314.84	0.333917	1.76651	0.00315103	0.210931	0.596991	1.73423	0.894951
29	0	0	0.904348	0.0956522	0	8314.84	0.333917	1.76651	0.00315103	0.210931	0.596991	1.73423	0.894951
29	0	0	0.893805	0.106195	0	8314.51	0.330002	1.76477	0.00331362	0.202346	0.599243	1.74123	0.889212
29	0	0	1	0	0	8317.33	0.217585	1.73462	0	0.183019	0.516239	1.64491	1.20163
30	0	0	1	0	0	8212.88	0.0577439	1.1853	0	2.5455	5.70551	6.1011	0
30	0	0	1	0	0	8181.57	0.235794	3.25449	0	0.513781	9.33959	10.2191	0
30	0	0	1	0	0	8178.2	0.320981	3.17966	0	0.547947	9.54338	10.3959	0
30	0	0	1	0	0	8178.2	0.320981	3.17966	0	0.547947	9.54338	10.3959	0
30	0	0	0.826087	0.173913	0	8426.45	0.407229	2.71164	0.00493382	0.74103	12.8072	15.4377	0
30	0	0	0.930435	0.0695652	0	8396.2	0.268099	2.92995	0.00150862	0.422069	12.9292	15.3171	0
30	0	0	1	0	0	8232.98	0.243445	1.17256	0	2.31187	5.94143	6.38123	0
30	0	0	1	0	0	8307.45	0.217421	1.11821	0	1.59591	6.68892	7.15957	0
30	0	0	0.763158	0.236842	0	8104.42	0.0497922	3.56538	0.0083576	0.446695	4.62041	6.0643	0
30	0.157895	0.175439	0.447368	0.184211	0	8103.72	0.0330465	3.682	0.0266709	0.0904701	5.30472	6.76796	0
30	0.0689655	0.189655	0.534483	0.0344828	0.155172	8103.99	0.11909	3.53519	0.0320477	0.0877218	4.93099	6.43824	0
30	0	0	1	0	0	8105.01	0.308316	2.47848	0	0.382183	3.97798	5.21327	0
30	0	0	0.893805	0.106195	0	8105.83	0.0550351	2.04078	0.00289099	0.387602	2.91372	4.35903	0
30	0	0.00862069	0.853448	0.112069	0	8106.28	0.0590533	2.10954	0.0041841	0.340741	2.89559	4.36303	0
30	0	0	1	0	0	8124.46	0.186069	2.54529	0	0.523324	3.0272	4.60464	0
30	0	0	0.894737	0.105263	0	8105.7	0.0562957	2.03528	0.00296775	0.388794	2.91221	4.35672	0
30	0	0.0263158	0.675439	0.0701754	0	8104.04	0.0458387	2.46499	0.00935999	0.484793	3.98327	5.63993	0
30	0	0.0263158	0.675439	0.0701754	0	8104.04	0.0458387	2.46499	0.00935999	0.484793	3.98327	5.63993	0
30	0	0.0263158	0.675439	0.0701754	0	8104.04	0.0458387	2.46499	0.00935999	0.484793	3.98327	5.63993	0
30	0	0.0173913	0.678261	0.0695652	0	8104.04	0.0458387	2.45922	0.00922034	0.49172	3.98505	5.64199	0
30	0.150442	0.141593	0.389381	0.0619469	0.0884956	8101.11	0.0877703	2.77697	0.0387787	0.079384	3.9581	5.52513	0
30	0.106195	0.115044	0.530973	0.0884956	0.123894	8099.41	0.0356985	3.02787	0.0160794	0.0615345	4.06254	5.53133	0
30	0	0	1	0	0	8108.27	0.287255	3.42007	0	0.782681	4.70664	6.01632	0
31	0	0	1	0	0	8206.98	0.0615297	1.15907	0	2.6247	5.62598	6.02362	0
31	0	0	1	0	0	8306.96	0.421746	1.23437	0	1.4472	7.06248	7.83765	0
31	0	0.00877193	0.973684	0.0175439	0	8479.74	0.399129	1.29239	0.000646552	1.14874	6.14015	9.88203	0
31	0	0	0.973684	0.0263158	0	8444.57	0.488694	1.37801	0.000976596	0.973741	6.88932	8.64531	0
31	0	0	1	0	0	8395.5	0.166316	1.2837	0	0.813195	5.8702	9.54105	0
31	0	0	0.982759	0.0172414	0	8478.31	0.6406	1.54361	0.000221239	1.29196	7.16672	9.20832	0
31	0	0	1	0	0	8171.03	0.258061	3.53611	0	0.311137	9.37301	10.2881	0
31	0	0	1	0	0	8169.1	0.160436	1.07158	0	0.94162	2.47238	3.2106	0
31	0	0	0.4375	0.544643	0	8083.8	0.0571058	1.48382	0.0202213	1.60629	1.45807	1.55739	0.278515
31	0	0	0.577586	0.422414	0	8078.86	0.0797124	1.32161	0.0139645	1.78862	1.29362	1.29736	0.313073
31	0	0	0.608696	0.391304	0	8078.88	0.0767062	1.31066	0.0131039	1.78428	1.28758	1.29112	0.313662
31	0	0	0.608696	0.391304	0	8078.88	0.0767062	1.31066	0.0131039	1.78428	1.28758	1.29112	0.313662
31	0	0	0.608696	0.391304	0	8078.88	0.0767062	1.31066	0.0131039	1.78428	1.28758	1.29112	0.313662
31	0	0	0.587719	0.412281	0	8078.91	0.0925558	1.33823	0.0140182	1.79607	1.31576	1.31857	0.309476
31	0	0	0.543103	0.456897	0	8084.44	0.168131	1.44821	0.0137703	1.80974	1.45375	1.45898	0.267853
31	0	0	0.112069	0.887931	0	8076.29	0.123055	1.40552	0.0553955	1.96803	1.34663	1.33945	0.2685
31	0	0	0.775862	0.224138	0	8095.75	0.164404	1.43649	0.00610241	1.42442	1.09256	1.29605	0.334197
31	0	0	0.947368	0.0526316	0	8113.19	0.328192	1.52323	0.00149746	1.21418	1.41117	1.78546	0.156426
31	0	0	0.95614	0.0175439	0	8134.7	0.0772147	3.59685	0.00111607	0.251963	8.44508	9.4932	0
32	0	0	1	0	0	8250.08	0.425094	1.36769	0	2.43109	5.95682	6.58729	0
32	0	0.079646	0.690265	0.176991	0	8190.28	0.380609	1.30142	0.00986764	2.61806	5.76251	5.98616	0
32	0	0	0.60177	0.39823	0	8149.14	0.0532093	1.40113	0.020491	3.02494	5.56933	5.64951	0
32	0	0.0347826	0.721739	0.243478	0	8172.45	0.256631	1.31019	0.00644714	2.82275	5.64074	5.80581	0
32	0	0	0.964912	0.0350877	0	8211.26	0.0859441	1.25403	0.000869565	2.35331	6.12247	6.28865	0
32	0	0	1	0	0	8192.74	0.38914	1.51302	0	3.01174	5.75723	5.73774	0
32	0	0.026087	0.947826	0.026087	0	8137.75	0.130306	3.64443	0.00140663	0.170965	6.5457	7.73817	0
32	0.00862069	0.0431034	0.905172	0.0431034	0	8136.42	0.118189	3.66771	0.00344096	0.154178	6.53199	7.72846	0
32	0.0521739	0.191304	0.504348	0.0521739	0.104348	8119.43	0.0565178	3.87374	0.0315642	0.0817085	6.1308	7.44166	0
32	0.353982	0.168142	0.230088	0.132743	0.115044	8104.96	0.0602336	3.78161	0.0734658	0.0529944	6.96769	8.30899	0
32	0	0	1	0	0	8189.38	0.30541	1.26226	0	2.0464	3.78484	3.99144	0
32	0	0	1	0	0	8168.08	0.378496	1.58734	0	2.81925	3.87933	3.8667	0
32	0	0	1	0	0	8178.7	0.0545689	1.45002	0	2.93335	5.90506	5.89894	0
32	0	0.026087	0.721739	0.243478	0	8167.3	0.213101	1.31465	0.00675458	2.85284	5.63215	5.78109	0
32	0	0.00862069	0.87931	0.112069	0	8195.81	0.0983064	1.28114	0.00330992	2.65353	6.01497	6.07727	0
32	0	0.0517241	0.801724	0.146552	0	8182.3	0.0585881	1.30298	0.00536342	2.70189	5.91521	5.9966	0
32	0	0.0434783	0.8	0.156522	0	8181.03	0.0558334	1.30737	0.00572698	2.7147	5.90737	5.99031	0
32	0	0	0.991379	0.00862069	0	8108.6	0.0733699	3.71871	0.000217391	0.233353	5.62918	7.05484	0
32	0.0172414	0.215517	0.431034	0	0.267241	8103.87	0.0567031	3.58109	0.0425522	0.0822458	5.08394	6.57798	0
32	0.469027	0.212389	0.0884956	0.141593	0.0884956	8101.99	0.0847528	3.70917	0.0883542	0.0343115	6.7079	8.10082	0
33	0	0	1	0	0	8216.98	0.673854	0.784841	0	1.56966	4.04193	4.60989	0
33	0	0	1	0	0	8200.67	0.208672	1.0695	0	2.63264	5.3791	5.87976	0
33	0	0	1	0	0	8207.47	0.311641	1.18517	0	2.5846	5.39344	5.92837	0
33	0	0	1	0	0	8222.69	0.401973	1.30952	0	2.62246	5.51157	6.06711	0
33	0	0	1	0	0	8199.92	0.15505	1.06785	0	2.68886	5.42049	5.90205	0
33	0	0	1	0	0	8225.41	0.422643	1.31789	0	2.63209	5.54829	6.10456	0
33	0	0	1	0	0	8222.4	0.416081	1.31015	0	2.64013	5.56382	6.11446	0
33	0	0	1	0	0	8210.72	0.346526	1.25389	0	2.63364	5.48416	6.02125	0
33	0	0	1	0	0	8210.63	0.342992	1.25167	0	2.63335	5.48219	6.01819	0
33	0.263158	0.403509	0.0438596	0.0789474	0.149123	8102.22	0.0348689	3.65741	0.1029	0.0378823	5.31894	6.80908	0
33	0	0	1	0	0	8209.91	0.338498	1.24494	0	2.63078	5.46874	6.0048	0
33	0.25	0.413793	0	0.0948276	0.189655	8101.38	0.0347114	3.63065	0.119472	0.0381312	5.30409	6.80676	0
33	0	0	0.974138	0.0258621	0	8106.14	0.058561	3.53116	0.00107759	0.245053	5.79909	7.23418	0
33	0	0	1	0	0	8249.53	0.490658	1.3108	0	2.43951	5.85384	6.39657	0
33	0	0	1	0	0	8237.39	0.443709	1.33169	0	2.54283	5.52627	6.14	0
33	0	0	1	0	0	8223.89	0.414203	1.31296	0	2.62842	5.53496	6.09072	0
33	0	0	1	0	0	8223.89	0.414203	1.31296	0	2.62842	5.53496	6.09072	0
33	0	0	1	0	0	8225.22	0.371163	1.29229	0	2.52504	5.41781	5.992	0
33	0	0	1	0	0	8225.24	0.53865	1.4025	0	2.50048	5.68411	6.32956	0
33	0	0	1	0	0	8189.87	0.32004	2.11974	0	1.80602	5.98316	6.80415	0
33	0	0	1	0	0	8192.47	0.313108	2.11983	0	1.8099	6.02965	6.84755	0
33	0	0	0.224138	0.767241	0	8159.75	0.0373587	2.25328	0.0436473	1.43128	5.82677	6.74796	0
33	0	0	0.224138	0.775862	0	8164.45	0.0650388	2.37412	0.0347746	1.32103	6.055	6.99209	0
34	0	0	1	0	0	8216.98	0.673854	0.784841	0	1.56966	4.04193	4.60989	0
34	0	0	1	0	0	8202.37	0.220584	1.3295	0	3.01082	5.79206	5.76754	0
34	0	0	1	0	0	8242.25	0.143317	1.14987	0	2.5319	6.16385	6.2259	0
34	0	0	1	0	0	8223.54	0.331773	1.19943	0	2.76327	6.02946	6.00773	0
34	0	0	1	0	0	8186.97	0.10437	1.37197	0	3.26376	5.53898	5.51418	0
34	0	0	1	0	0	8215.62	0.300789	1.0686	0	2.6893	5.77044	6.21135	0
34	0	0	1	0	0	8288.03	0.16656	1.18808	0	2.03856	6.26657	6.78499	0
34	0.686957	0.226087	0.00869565	0.0695652	0	8178.34	0.0921289	2.49548	0.101218	0.0182054	11.7732	12.6084	0
34	0	0	1	0	0	8213.03	0.313375	1.02674	0	2.64514	5.62487	6.31137	0
34	0	0	1	0	0	8228.61	0.318481	1.21939	0	2.72424	6.05766	6.03459	0
34	0	0	1	0	0	8203.65	0.244139	1.31902	0	2.97789	5.81779	5.79333	0
34	0	0	1	0	0	8184.5	0.38499	1.52846	0	3.01907	5.74516	5.72462	0
34	0	0	1	0	0	8244.66	0.233263	1.21822	0	2.52741	6.22922	6.21898	0
34	0	0	1	0	0	8240.08	0.367205	1.28113	0	2.67682	6.07999	6.05845	0
34	0	0	1	0	0	8186.74	0.303087	1.52236	0	3.03908	5.72198	5.70041	0
34	0	0	1	0	0	8187.59	0.305163	1.52237	0	3.0365	5.72671	5.70514	0
34	0.0619469	0.221239	0.672566	0	0.00884956	7904.41	0.0687964	3.46133	0.0104261	0.112219	0.126776	8.04257	0.149147
35	0	0	1	0	0	8233.64	0.470416	1.30618	0	2.50757	5.78742	6.32406	0
35	0	0	0.862069	0.137931	0	8309.67	0.0597703	1.77678	0.00362682	1.26976	8.65432	9.24309	0
35	0	0	1	0	0	8375.46	0.0552971	1.81058	0	1.35317	9.14834	9.68579	0
35	0	0	1	0	0	8359.63	0.131895	1.81099	0	1.20177	9.01119	9.53647	0
35	0	0	0.991379	0	0	8208.11	0.0457751	2.57016	0.000221239	1.1052	9.36001	10.1269	0
35	0.079646	0.238938	0.300885	0.20354	0.00884956	8161.27	0.220648	3.60193	0.0436627	0.117709	9.70247	10.6175	0
35	0	0.00877193	0.859649	0	0	8156.64	0.195228	3.68977	0.00596053	0.175181	9.37952	10.3202	0
35	0.362069	0.172414	0.258621	0.0775862	0.12931	8129.28	0.0704149	3.68707	0.0605165	0.0374183	8.89831	9.93138	0
36	0	0	1	0	0	8233.64	0.470416	1.30618	0	2.50757	5.78742	6.32406	0
36	0	0	1	0	0	8230.62	0.377957	1.30226	0	2.5053	5.43039	6.02226	0
36	0	0	1	0	0	8200.67	0.208672	1.0695	0	2.63264	5.3791	5.87976	0
36	0	0	1	0	0	8177.26	0.0609095	1.02249	0	2.54658	5.10636	5.55202	0
36	0	0	1	0	0	8186.67	0.248143	0.939182	0	2.34053	5.00566	5.52567	0
36	0	0	1	0	0	8203.13	0.18081	1.09616	0	2.28488	5.1517	5.75331	0
36	0	0	1	0	0	8192.61	0.20923	0.99248	0	2.50051	5.21258	5.72335	0
36	0	0	1	0	0	8229.58	0.52541	1.49396	0	2.39188	5.87569	6.54478	0
36	0	0	1	0	0	8236.8	0.557793	1.37834	0	2.53079	5.71142	6.3457	0
36	0.0265487	0.168142	0.646018	0.159292	0	8103.77	0.136853	3.23374	0.0166519	0.115241	4.50283	6.01805	0
36	0.198276	0.362069	0	0.284483	0.137931	8100.27	0.0426314	3.59731	0.116557	0.0455005	5.35951	6.865	0
36	0.132743	0.345133	0.00884956	0.0707965	0.362832	8102.08	0.0339513	3.61389	0.101566	0.0483859	5.22386	6.73105	0
36	0.417391	0.182609	0.0434783	0.0956522	0.26087	8101.46	0.0966238	3.17284	0.113228	0.0197021	4.73246	6.27819	0
37	0	0	1	0	0	8195.75	0.335644	1.05721	0	1.94261	3.96152	4.27873	0
37	0	0	1	0	0	8044.81	0.0604078	1.84387	0.000215517	1.79268	4.70017	4.83461	0
37	0	0	1	0	0	8061.39	0.23969	1.70911	0	1.6951	4.64454	5.16727	0
37	0	0	1	0	0	8001.83	0.169654	2.63775	0	0.879196	1.31292	2.68579	0.0282805
38	0	0	1	0	0	8199.89	0.231041	1.07629	0	1.87506	3.84903	4.17297	0
38	0	0	0.982759	0.0172414	0	8222.02	0.516854	1.30742	0.000434783	2.71026	6.06319	6.04364	0
38	0	0	0.956522	0.0434783	0	8184.37	0.160496	1.39565	0.000646552	3.12712	5.67837	5.66147	0
38	0	0	1	0	0	8189.1	0.243879	1.41867	0	2.93638	5.91482	5.8993	0
38	0	0.0689655	0.689655	0.137931	0	8094.94	0.0694233	1.4523	0.00924852	3.49275	4.51249	4.49398	0
38	0	0	1	0	0	8146.21	0.309528	1.398	0	3.56932	4.99838	4.98253	0
38	0	0	0.238938	0.752212	0	8160.22	0.0358962	2.2671	0.0403904	1.42897	5.85727	6.77687	0
38	0	0	1	0	0	8135.13	0.337751	1.11905	0	4.04695	5.3059	5.26965	0
38	0.991379	0	0	0	0.00862069	7915.12	0.0845395	4.29165	0.494823	0.000215517	3.23033	3.51594	0
38	0	0.0775862	0.810345	0.112069	0	8093.94	0.127655	1.62133	0.00505275	3.41207	4.22744	4.20811	0
38	0	0.0603448	0.663793	0.275862	0	8101.53	0.0563996	1.51225	0.0087857	3.30936	4.46212	4.44578	0
38	0	0.0884956	0.628319	0.274336	0	8099.1	0.0576076	1.49252	0.00978313	3.35722	4.46311	4.44618	0
38	0	0	0.982301	0.0176991	0	8136.61	0.253623	1.41747	0.000646552	3.6426	4.9937	4.97671	0
38	0	0	0.991379	0.00862069	0	8152.74	0.290645	1.39889	0	3.54071	5.04437	5.02914	0
38	0	0	1	0	0	8115.59	0.226115	1.38188	0	3.61563	4.76679	4.74846	0
38	0	0	0.947368	0.0526316	0	8116.12	0.0576226	1.42795	0.0012931	3.7894	4.95299	4.93222	0
38	0	0	0.93913	0.0608696	0	8124.11	0.060812	1.44899	0.00172414	3.72575	5.02935	5.00952	0
38	0	0	1	0	0	8176.1	0.0700209	1.24085	0	3.76827	5.2199	5.18958	0
39	0	0	1	0	0	8167.79	0.160285	1.2667	0	1.93336	3.37039	3.55851	0
39	0	0	1	0	0	8166.69	0.284128	1.34626	0	2.05649	3.55702	3.71151	0
39	0	0	0.946903	0.0530973	0	8200.38	0.153672	1.42558	0.00131579	2.30002	3.85899	3.95058	0
39	0	0	0.973913	0.026087	0	8190.21	0.156053	1.46634	0.000646552	2.33715	3.8135	3.88092	0
39	0	0	0.955752	0.0442478	0	8196.08	0.0874216	1.50515	0.00107759	2.45116	3.88911	3.92732	0
39	0	0	0.931034	0.0689655	0	8159.78	0.0572192	1.21532	0.00131579	1.93168	3.08513	3.24799	0
39	0	0	1	0	0	8179.71	0.131333	1.08117	0	1.60841	3.22185	3.57116	0
39	0.275862	0.0172414	0.551724	0.0431034	0.0431034	7923.95	0.0554597	3.64179	0.0237156	0.0653801	3.77421	4.44722	0
39	0	0	1	0	0	8185.96	0.142883	1.04293	0	1.53738	3.40309	3.81426	0
39	0	0	1	0	0	8174.36	0.42218	0.954863	0	2.01073	4.29106	4.68247	0
39	0	0	1	0	0	8199.2	0.323487	1.25154	0	2.09816	3.89047	4.09725	0
39	0	0	0.911504	0.0884956	0	8195.56	0.0883787	1.51723	0.00197368	2.49628	3.9073	3.93252	0
39	0	0	0.973913	0.026087	0	8191.5	0.145362	1.47221	0.000646552	2.35187	3.82343	3.88811	0
39	0	0	0.946903	0.0530973	0	8195.72	0.0833171	1.51038	0.00153509	2.4693	3.9027	3.93516	0
39	0	0	0.866071	0.133929	0	8154.94	0.358732	1.56361	0.00552155	2.49501	3.63308	3.63683	0
39	0	0	1	0	0	8155.3	0.275114	1.52464	0.000431034	2.3815	3.67978	3.71627	0
39	0	0	0.991228	0.00877193	0	8154.13	0.280692	1.52964	0.000657895	2.3959	3.67811	3.70859	0
39	0	0	1	0	0	8155.81	0.273945	1.51655	0	2.35704	3.67854	3.72138	0
39	0	0	1	0	0	8155.81	0.273945	1.51655	0	2.35704	3.67854	3.72138	0
39	0	0	1	0	0	8155.81	0.273945	1.51655	0	2.35704	3.67854	3.72138	0
39	0	0	1	0	0	8155.81	0.273945	1.51655	0	2.35704	3.67854	3.72138	0
40	0	0.0175439	0.964912	0	0	8179.76	0.128303	2.69398	0.000221239	0.230375	1.96525	2.88224	0
40	0.0172414	0.0258621	0.681034	0.198276	0	8206.78	0.158351	2.70645	0.00904255	0.0918994	1.5737	1.87914	0.082789
40	0.362832	0.123894	0.40708	0.0619469	0	8223.47	0.0695562	3.53816	0.0260452	0.0370004	0.184222	0.781567	1.58823
40	0.439655	0.112069	0.293103	0.155172	0	8268.76	0.0321893	2.71156	0.0396357	0.0263754	0.0525401	0.193666	3.91318
40	0.521739	0.13913	0.191304	0.147826	0	8265.36	0.0326543	2.78183	0.0463161	0.0189458	0.0519668	0.193026	3.85606
40	0.447368	0.0175439	0.421053	0.114035	0	8268.91	0.0453093	2.62205	0.0376837	0.0334449	0.0568595	0.184398	3.98524
40	0.342105	0.0438596	0.473684	0.140351	0	8272.34	0.0403581	2.63758	0.0289275	0.0392537	0.053933	0.202226	3.98394
40	0.439655	0.112069	0.293103	0.155172	0	8269.28	0.0322643	2.7125	0.039031	0.0263754	0.0523366	0.194094	3.9144
40	0.166667	0.473684	0.157895	0.157895	0.0175439	8219.66	0.0799827	2.95789	0.0511261	0.0418671	0.117848	0.329501	3.5934
40	0.159292	0.274336	0.256637	0.141593	0.0707965	8211.16	0.106108	3.01848	0.0404313	0.0535803	0.0872951	0.206727	3.51905
40	0.172414	0.327586	0.215517	0.155172	0.0603448	8211.13	0.103994	3.00641	0.0459479	0.0490234	0.0952088	0.236274	3.53398
40	0.106195	0.336283	0.212389	0.20354	0.0707965	8200.79	0.087899	3.01845	0.043163	0.0526715	0.117354	0.233513	3.44642
41	0.00862069	0.189655	0.663793	0	0	8173.43	0.101593	2.59204	0.0159311	0.1575	1.88752	2.84396	0
41	0	0	1	0	0	8306.88	0.130117	1.92032	0	0.19068	0.371465	0.800793	3.77193
41	0	0.0614035	0.605263	0.333333	0	8307.31	0.444929	2.15263	0.0154509	0.128144	0.0756804	0.990693	3.59083
41	0	0	0.866071	0.0714286	0	8344.57	0.44734	0.94476	0.00323276	0.412634	0.225206	2.06139	0.698352
41	0.0614035	0.0263158	0.684211	0.192982	0.0350877	8347.02	0.528458	1.80547	0.0120266	0.103114	0.0631985	1.41497	1.92731
41	0.0258621	0.0517241	0.594828	0.310345	0.0172414	8331.94	0.498173	2.00543	0.0122407	0.129822	0.0600831	1.22185	2.83183
41	0.0176991	0.557522	0.0530973	0.353982	0.0176991	8309.92	0.131926	1.78445	0.0811299	0.0782635	0.345297	1.29633	2.69928
41	0.0172414	0.491379	0.0948276	0.362069	0.0344828	8322.12	0.251863	1.80357	0.0884507	0.141625	0.229363	1.27358	2.72226
42	0	0	0.964912	0	0	8171.24	0.192652	3.03952	0.000657895	0.334023	1.91313	2.60076	0
42	0.0614035	0.219298	0.561404	0.122807	0	8195.48	0.12476	3.06501	0.0144319	0.080495	1.2601	1.89312	0.163346
42	0.140351	0.263158	0.157895	0.394737	0.0438596	8208.01	0.148152	2.58808	0.0652129	0.0674795	0.700599	0.838408	2.79888
42	0.00877193	0.701754	0.00877193	0.280702	0	8273.53	0.770899	2.27743	0.129251	0.134071	0.489097	1.26616	2.21228
42	0.00884956	0.495575	0	0.486726	0.00884956	8253.58	0.666096	2.35481	0.108011	0.129663	0.442699	1.13771	2.71008
42	0	0	0.725664	0.19469	0	8215.21	0.0986752	2.32779	0.0101201	0.314038	1.50532	1.97068	0.141876
42	0	0	0.905172	0.0948276	0	8232.06	0.196452	2.25196	0.00276475	0.303925	1.45913	1.83837	0.1122
42	0	0.0434783	0.495652	0.46087	0	8312.19	0.350019	1.83445	0.0334626	0.421367	1.28337	1.67345	0.336182
42	0	0	0.827586	0.12069	0	8200.68	0.107458	2.48367	0.00445191	0.24746	1.57229	1.94396	0.0388553
42	0	0.0789474	0.0964912	0.824561	0	8410.65	0.498273	1.58567	0.0674185	0.486159	1.13667	1.52459	0.678338
42	0	0.0431034	0.37069	0.586207	0	8289.33	0.363237	2.07752	0.0395708	0.288726	1.30956	1.67765	0.343173
42	0	0.0347826	0.669565	0.295652	0	8260.08	0.291032	2.17771	0.0148203	0.274743	1.37789	1.74951	0.204003
42	0.025641	0.188034	0.25641	0.529915	0	8260.58	0.332427	2.34429	0.0419176	0.136512	1.39329	1.70862	0.292487
43	0	0	0.965517	0	0	8174.96	0.269669	3.08178	0.000657895	0.346149	2.0622	2.76573	0
43	0	0	1	0	0	8094.81	0.174535	3.58727	0	0.207795	3.53095	4.2246	0
43	0	0	0.938053	0.0353982	0	8148.75	0.0810279	3.16881	0.00159789	0.211267	2.6224	3.32074	0
43	0	0.121739	0.747826	0.113043	0	8124.82	0.0382049	3.16099	0.00718936	0.246767	2.94016	3.59232	0
43	0	0.00877193	0.982456	0	0	8142.62	0.131903	3.24326	0.000434783	0.248399	2.77829	3.41216	0
43	0	0.111111	0.752137	0.111111	0	8123.98	0.035	3.15716	0.00665289	0.242102	2.95529	3.6023	0
43	0	0.0353982	0.911504	0.0353982	0	8144.84	0.144117	3.33226	0.00208279	0.161301	2.84587	3.38392	0
43	0	0.0172414	0.543103	0.0172414	0	8163.84	0.0792358	3.07563	0.0309883	0.378748	1.98291	2.53751	0
43	0	0.0344828	0.913793	0	0	8138.42	0.127489	3.29482	0.00281325	0.194626	2.85542	3.42248	0
43	0	0.140351	0.736842	0.105263	0	8126.37	0.0468402	3.17367	0.00709537	0.252863	2.91551	3.56669	0
43	0	0.205357	0.696429	0.0625	0	8125.81	0.0423623	3.16006	0.00965071	0.244622	2.89137	3.56971	0
43	0	0.112069	0.767241	0.112069	0	8128.41	0.0622916	3.19388	0.00601236	0.25641	2.89624	3.53703	0
43	0.491228	0.0438596	0.315789	0	0	8114.32	0.0413368	3.08791	0.0110003	0.0392719	2.83165	3.69274	0
43	0.00884956	0.0353982	0.858407	0.0619469	0	8141.81	0.127065	3.33081	0.00396579	0.145833	2.87431	3.41006	0
43	0	0.0438596	0.578947	0.377193	0	8115.08	0.0412451	2.87804	0.0229641	0.122584	3.24094	3.85066	0
43	0.0619469	0.0353982	0.566372	0.336283	0	8117.04	0.0374348	2.93359	0.0219013	0.111176	3.19403	3.788	0
43	0.396552	0.0948276	0.206897	0.301724	0	8114.77	0.0618483	2.85544	0.0832394	0.0446126	3.30731	3.87524	0
43	0	0.0172414	0.982759	0	0	8139.75	0.109158	3.21709	0.000217391	0.258261	2.78226	3.4378	0
43	0	0.0782609	0.878261	0.0434783	0	8133.26	0.0822729	3.20502	0.00369044	0.263577	2.83901	3.49233	0
43	0	0.0862069	0.913793	0	0	8137.78	0.0942801	3.20048	0.00233371	0.261448	2.78437	3.4509	0
43	0	0.106195	0.893805	0	0	8136.64	0.0859157	3.19727	0.00323185	0.261331	2.78901	3.45991	0
44	0	0	1	0	0	8403.5	0.209278	1.69227	0	1.24785	1.35451	7.24995	0.0449714
44	0	0	1	0	0	8413.13	0.195797	1.63382	0	1.36081	1.95113	7.72489	0
44	0	0	0.95614	0.0438596	0	8304.81	0.0613401	4.40592	0.00107759	0.19954	1.70255	5.13754	0.00245649
44	0	0.00877193	0.938596	0.0526316	0	8392.33	0.154996	2.02064	0.00140663	0.765863	1.50087	6.94453	0.0223597
44	0	0	1	0	0	8410.16	0.221633	1.66922	0	1.24991	1.9194	7.6247	0
44	0.417391	0.0608696	0.434783	0.0782609	0.00869565	8305.4	0.0333805	3.74197	0.0293879	0.0408568	1.89928	5.99541	0
44	0.0438596	0	0.903509	0.0526316	0	8322.39	0.0627935	4.68348	0.00254923	0.127775	1.58329	5.23493	0.0112134
44	0	0	0.956522	0.0434783	0	8341.66	0.165067	4.18779	0.00108696	0.295449	1.61816	5.86155	0.00894055
44	0	0	1	0	0	8278.56	0.211219	3.84248	0	0.257546	1.55811	3.20902	0.0408669
44	0.347826	0	0.626087	0.026087	0	8242.2	0.0559768	3.36647	0.0247622	0.0610397	1.56153	2.59331	0.059091
44	0.666667	0	0.280702	0.0526316	0	8226.84	0.0236597	3.37357	0.0662072	0.0186867	1.45865	2.70588	0.0742738
44	0	0	1	0	0	8230.99	0.275109	2.65313	0	0.807475	2.44111	3.14904	0
44	0	0	1	0	0	8230.99	0.275109	2.65313	0	0.807475	2.44111	3.14904	0
44	0	0	1	0	0	8230.99	0.275109	2.65313	0	0.807475	2.44111	3.14904	0
44	0	0	1	0	0	8230.99	0.275109	2.65313	0	0.807475	2.44111	3.14904	0
44	0	0	1	0	0	8230.99	0.275109	2.65313	0	0.807475	2.44111	3.14904	0
44	0	0	1	0	0	8230.99	0.275109	2.65313	0	0.807475	2.44111	3.14904	0
44	0	0	1	0	0	8271.32	0.478199	3.03344	0	0.629658	2.0149	3.24813	0
44	0	0	0.973451	0.0265487	0	8295.78	0.268932	3.28662	0.000646552	0.436528	1.92258	3.52054	0
44	0	0.0948276	0.827586	0	0.0258621	8252.61	0.114333	3.96342	0.00448889	0.453104	1.42955	4.04789	0.0399503
44	0	0.0263158	0.912281	0	0.0263158	8258.18	0.146506	3.97928	0.00282609	0.427131	1.39771	4.05775	0.0437083
45	0	0	1	0	0	8405.14	0.239872	1.5443	0	1.24039	1.25577	7.30789	0.0615298
45	0	0	0.982759	0.0172414	0	8243.31	0.0525253	2.55713	0.000431034	1.0393	1.25118	5.17604	0.122519
45	0	0	0.948276	0.0517241	0	8282.07	0.0784084	2.56182	0.00108696	1.18757	0.75252	5.73812	0.127042
45	0	0	0.974138	0.0258621	0	8363	0.306571	1.97545	0.000431034	1.30302	0.252897	6.17938	0.127498
45	0	0	1	0	0	8312.94	0.27383	3.35101	0	0.396158	1.48931	5.39747	0.028933
45	0	0	0.982609	0.0173913	0	8240.16	0.0880766	2.47869	0.000431034	0.982641	1.25546	5.1763	0.125349
45	0	0	0.982609	0.0173913	0	8239.45	0.0710983	2.52439	0.000431034	1.00991	1.28209	5.14723	0.122602
45	0	0	1	0	0	8331.96	0.178504	2.10328	0	1.00373	0.5883	5.84892	0.127498
46	0	0	1	0	0	8405.14	0.239872	1.5443	0	1.24039	1.25577	7.30789	0.0615298
46	0	0	1	0	0	8395.75	0.168546	1.47869	0	1.25142	0.994148	7.10358	0.0922293
46	0	0	1	0	0	8377.68	0.0969292	1.85666	0	0.728434	0.697552	7.13792	0.127498
46	0	0	1	0	0	8350.68	0.247862	2.32923	0	0.573616	0.721642	7.37209	0.334137
46	0.0956522	0.165217	0.347826	0.165217	0.0173913	8303.72	0.299622	2.07932	0.0348667	0.0655532	1.48993	7.96584	0.170444
47	0	0	1	0	0	8395.04	0.0644811	1.36756	0	0.997002	1.0977	7.34002	0.0917182
47	0	0	0.973451	0.0265487	0	8460.5	0.169425	1.08454	0.000646552	1.79347	2.17035	8.9941	0
47	0	0	1	0	0	8656.62	0.0844272	0.771899	0	1.08172	0.519555	5.28892	0.131018
47	0.238938	0.0619469	0.672566	0.0265487	0	8619.67	0.403234	1.05405	0.00731671	0.0613137	0.241526	4.19286	0.150737
47	0	0	1	0	0	8632.03	0.179889	1.00403	0	0.263722	0.326723	4.28395	0.150737
47	0.0347826	0	0.782609	0.182609	0	8584.95	0.334905	1.28422	0.00615673	0.139611	0.681502	3.74579	0.156542
47	0	0.0258621	0.87069	0.0948276	0	8614.24	0.234733	1.21804	0.00304348	0.246451	0.684972	3.91384	0.154632
47	0	0.00884956	0.964602	0.0265487	0	8622.5	0.258155	1.18617	0.00107759	0.230693	0.565198	4.00865	0.150918
47	0	0.0173913	0.878261	0.0869565	0	8604.18	0.183477	1.2226	0.00280172	0.283726	0.795421	3.8157	0.168333
47	0	0.0964912	0.833333	0.0350877	0	8622.83	0.0726476	0.950095	0.00452792	0.397354	0.415985	4.30385	0.150737
47	0	0	0.831858	0.168142	0	8560.84	0.289831	1.32893	0.00447846	0.192099	0.717364	3.60699	0.177926
47	0	0	0.946903	0.0530973	0	8618.32	0.5328	1.49996	0.00110619	0.354245	0.410656	3.71094	0.150737
47	0	0.00869565	0.982609	0.00869565	0	8640.35	0.690607	1.19704	0.000215517	0.183216	0.0721	4.14107	0.150737
47	0	0	1	0	0	8424.21	0.163414	2.37163	0.000215517	0.411367	0.325294	5.83797	0.270687
47	0	0	0.818966	0.181034	0	8354.5	0.0735065	1.58255	0.0049154	0.651098	0.641528	7.88132	0.0590881
48	0	0.0263158	0.973684	0	0	8389.43	0.0991874	1.38389	0.000646552	0.970592	0.982072	7.26374	0.108295
48	0	0.0530973	0.929204	0	0	8615.77	0.624406	1.02248	0.00172414	0.699129	0.319373	6.36678	0.0913645
48	0	0.0714286	0.910714	0.0178571	0	8544.23	0.156427	1.2589	0.00193966	1.38604	0.723418	7.37221	0.0853449
48	0	0	1	0	0	8598.99	0.622854	0.918894	0	1.02575	0.466738	6.56896	0.0853449
48	0	0	1	0	0	8599.41	0.617882	0.901197	0	1.06585	0.505261	6.55995	0.0853449
48	0	0	1	0	0	8607.03	0.672374	0.96385	0	0.839249	0.336899	6.45636	0.0877961
48	0	0	1	0	0	8597.57	0.61084	0.919662	0	1.04183	0.483418	6.59151	0.0853449
48	0	0	1	0	0	8599.99	0.459789	0.594683	0	1.23355	1.14673	6.02295	0.0364275
48	0	0	1	0	0	8572.66	0.520631	0.935059	0	1.2918	0.739055	6.9647	0.0853449
49	0	0.0258621	0.948276	0.0258621	0	8389.87	0.0870469	1.37485	0.00107759	1.17134	0.932808	7.11324	0.102962
49	0	0	0.974138	0.0258621	0	8515.58	0.61685	1.17375	0.000442478	1.81675	1.35747	7.86617	0.0410068
49	0	0	1	0	0	8378.85	0.0706559	1.82906	0	0.672802	0.764776	7.20461	0.127498
49	0	0	1	0	0	8374.2	0.262952	1.78298	0	0.332571	1.06644	7.51748	0.137491
49	0	0	1	0	0	8408.18	0.253647	1.41254	0	1.14341	1.41639	7.50895	0.0434284
49	0	0	1	0	0	8379.5	0.0587404	1.80523	0	0.634505	0.804703	7.2447	0.127498
49	0	0	1	0	0	8395.83	0.26138	1.74553	0	1.19384	1.17734	7.04884	0.0641375
49	0	0	1	0	0	8393.92	0.0789761	1.39077	0	1.13446	1.0487	7.22347	0.0909816
49	0	0	1	0	0	8379.01	0.0646173	1.8172	0	0.651829	0.781061	7.22148	0.127498
49	0	0	1	0	0	8376.95	0.189195	1.84059	0	0.848088	0.580164	7.01422	0.127498
49	0	0.0350877	0.964912	0	0	8425.79	0.0583092	1.32029	0.000884956	1.34378	2.03542	8.04712	0
49	0	0	1	0	0	8376.82	0.189538	1.83999	0	0.851667	0.575102	7.00956	0.127498
49	0	0	1	0	0	8405.03	0.143879	1.42926	0	0.931774	1.36314	7.57855	0.0576573
49	0	0.0789474	0.842105	0.0789474	0	8404.67	0.0775704	1.65704	0.00412904	1.26803	1.62285	7.46218	0.010692
49	0	0	1	0	0	8405.86	0.196928	1.46383	0	1.17055	1.27271	7.36918	0.06163
49	0	0	1	0	0	8401.98	0.273549	1.63118	0	1.28353	1.18726	7.18115	0.0668211
50	0	0	1	0	0	8392.21	0.323538	1.73705	0	1.28932	0.917553	6.88866	0.0936546
50	0	0	0.956897	0.0431034	0	8368.35	0.170215	2.39498	0.00111607	1.02991	0.854627	6.31604	0.0949127
50	0	0	0.991379	0.00862069	0	8296.9	0.109853	2.40212	0.000221239	1.28052	0.580599	5.91749	0.127498
50	0	0.0175439	0.947368	0.0350877	0	8361.02	0.33119	1.83418	0.00110619	1.35911	0.100139	6.3466	0.127498
50	0	0	0.973451	0.0265487	0	8302.91	0.187893	2.34339	0.000657895	1.25288	0.641545	5.81182	0.127498
50	0	0	0.956897	0.0431034	0	8302.21	0.190753	2.35245	0.00109649	1.23869	0.666656	5.78153	0.127498
50	0	0	1	0	0	8367.64	0.341688	2.22057	0	0.299449	1.13175	7.63806	0.316116
50	0	0	0.577586	0.0517241	0	8314.65	0.0563269	2.38219	0.0241967	0.33975	1.05352	8.05617	0.342458
50	0	0	0.8125	0	0	8323.85	0.0950195	2.54916	0.00821053	0.664965	0.688368	8.05813	0.362415
51	0	0	1	0	0	8386.93	0.304687	1.96697	0	1.15129	0.952178	6.75818	0.0859782
51	0	0	1	0	0	8240.62	0.0316276	2.96574	0	0.804432	1.64216	4.92915	0.0124206
51	0	0	1	0	0	8276.01	0.165284	2.83712	0	0.822804	1.2754	5.30213	0.0734331
51	0	0	1	0	0	8263.63	0.0855696	2.94482	0	0.74879	1.4596	5.15223	0.0426132
51	0	0	1	0	0	8314.97	0.251167	3.27586	0	0.405741	1.42917	5.49594	0.036224
51	0	0	1	0	0	8239.75	0.0325002	2.87372	0	0.859639	1.55939	4.98371	0.0282396
51	0	0	1	0	0	8238.59	0.0315966	2.88872	0	0.851094	1.58876	4.95856	0.0222152
51	0	0	1	0	0	8205.65	0.0368897	2.43609	0	0.7961	1.80622	4.65644	0.000447425
51	0	0.0172414	0.853448	0.12931	0	8367.72	0.173803	2.16612	0.0037231	1.37904	0.504398	6.40005	0.126443
51	0.773913	0	0.182609	0.0434783	0	8278.37	0.0181636	4.6203	0.0773234	0.0110103	1.16254	4.78871	0.0592866
51	1	0	0	0	0	8272.22	0.0878111	4.55229	0.190958	0	0.981976	4.62895	0.0731801
52	0	0	1	0	0	8410.65	0.0646178	1.56505	0	1.40328	1.8343	7.72632	5.69631e-06
52	0	0	1	0	0	8427.34	0.29621	1.4466	0	1.60473	2.3362	8.14444	0
52	0	0	1	0	0	8407.17	0.261929	1.81406	0	0.979333	1.81472	7.35919	5.39721e-05
52	0	0	1	0	0	8412.59	0.373799	1.67011	0	1.25849	2.09539	7.71881	0
52	0	0	1	0	0	8406.88	0.165015	1.76298	0	1.05108	1.7483	7.37947	0.00135863
52	0	0.0521739	0.904348	0.0434783	0	8405.34	0.102277	1.68525	0.00248135	1.17704	1.74652	7.47277	0.001425
52	0	0.0789474	0.877193	0.0438596	0	8404.73	0.0646555	1.65458	0.00344067	1.25318	1.70637	7.50505	0.00339622
52	0	0.0614035	0.815789	0.122807	0	8402.97	0.060692	1.68062	0.00509563	1.1796	1.6257	7.39702	0.00996884
52	0	0	1	0	0	8430.85	0.297373	2.19719	0	0.849026	1.65078	8.3828	0.00747105
52	0	0.00877193	0.991228	0	0	8410.27	0.0644186	1.57293	0	1.39724	1.8276	7.71547	1.49319e-05
52	0	0.0431034	0.956897	0	0	8408.05	0.061107	1.6023	0.00130435	1.37365	1.78562	7.6588	0.000518541
52	0	0	1	0	0	8416.31	0.240457	1.64185	0	1.3868	2.35936	7.92433	0
52	0	0.0431034	0.956897	0	0	8407.88	0.0613244	1.60477	0.0012931	1.37337	1.78755	7.65906	0.000482853
52	0	0	1	0	0	8360.58	0.137513	4.06005	0	0.382648	1.38693	6.24004	0.0342446
52	0.413793	0.198276	0.293103	0.0775862	0	8301.3	0.17391	1.95116	0.0501329	0.0388819	1.32887	3.98151	0.0747783
52	0.60177	0.106195	0.230088	0.0619469	0	8295.38	0.109467	2.04403	0.0701191	0.023895	1.22892	3.91161	0.0747783
53	0	0	0.491379	0.508621	0	8189	0.128151	0.716207	0.0194074	3.03324	5.52731	3.75746	0
53	0	0	1	0	0	8164.76	0.133836	3.09628	0	0.298965	2.28434	3.06061	0
53	0	0	0.330435	0.669565	0	8704.33	0.854527	0.884776	0.0364662	0.931352	0.782131	1.22727	1.03332
53	0	0	0.6	0.4	0	8726.71	0.844475	0.950831	0.0185878	0.877282	0.78476	1.21017	1.15908
53	0	0.0176991	0.725664	0.256637	0	8741.41	0.829409	1.08306	0.0094366	0.783888	0.79369	1.19789	1.32096
53	0	0.0964912	0.184211	0.719298	0	8498.81	0.585675	1.47733	0.0553705	0.531786	1.04989	1.43669	0.868018
53	0	0.0175439	0.72807	0.254386	0	8744.77	0.838773	1.06473	0.00814376	0.798185	0.784043	1.19063	1.32643
53	0	0.0869565	0.0956522	0.817391	0	8478.88	0.563364	1.41772	0.0584497	0.556798	1.06376	1.45883	0.785343
53	0	0.0172414	0.715517	0.267241	0	8748.06	0.844766	1.06745	0.00850773	0.802226	0.778182	1.1836	1.35225
53	0	0.0803571	0.401786	0.410714	0.0267857	8808.65	0.945105	1.20738	0.0251081	0.821161	0.700342	1.07484	1.98428
53	0.0948276	0.0775862	0.655172	0.172414	0	8246.02	0.0609777	1.76958	0.0126136	0.116276	0.0375862	0.18485	3.69664
53	0.00877193	0.710526	0	0.280702	0	8275.26	0.773285	2.26896	0.124807	0.137127	0.470071	1.2619	2.24938
54	0	0	1	0	0	8131.54	0.263128	1.5884	0	0.879424	0.833043	1.5447	0.334197
54	0	0	0.736842	0.263158	0	8098.19	0.328489	1.56344	0.00857312	2.98837	2.39043	2.36407	0
54	0.373913	0.121739	0.2	0.0869565	0.0869565	8068	0.0315973	4.71298	0.0556306	0.0317977	3.01195	4.28768	0
54	0.309735	0.0265487	0.575221	0.0619469	0.00884956	8087.73	0.0467683	4.54657	0.0123276	0.0465083	2.57751	3.80723	0
54	0	0	0.758621	0.103448	0	8116.6	0.391486	2.07784	0.00716436	0.389922	1.4205	2.22709	0.152697
54	0	0	0.921739	0.0782609	0	8067.5	0.260559	1.7624	0.00318484	0.669227	1.29806	1.96028	0.19366
54	0	0	1	0	0	8146.99	0.261611	0.995585	0	1.08801	2.69723	3.04402	0
54	0	0	1	0	0	8141.11	0.372263	1.06569	0	1.10762	2.41984	2.77857	0
54	0	0	1	0	0	8138.77	0.1876	0.909092	0	1.32532	2.45948	2.78026	0
54	0	0	1	0	0	8120.39	0.0571213	1.04415	0	1.42494	2.6615	2.92115	0
54	0	0	1	0	0	8132.48	0.393612	1.21437	0	1.06597	3.05593	3.30609	0
54	0.913793	0.0344828	0	0.0517241	0	8087.38	0.102638	4.55877	0.129456	0.00245996	2.36693	3.71304	0
55	0	0.0172414	0.543103	0.37069	0	8162.78	0.221575	1.73895	0.0132643	0.382566	0.100143	0.422869	0.950989
55	0	0	0.0973451	0.902655	0	8573.15	0.150582	1.61682	0.0542936	0.798987	6.17941	9.62169	0
55	0	0.146552	0.655172	0.198276	0	8450.89	0.210309	1.88401	0.00989145	0.695442	1.9558	6.30635	0
55	0	0.0973451	0.176991	0.690265	0.0353982	8543.28	0.101319	1.68275	0.051314	0.767008	5.22611	8.76486	0
55	0	0.236842	0.447368	0.315789	0	8498.12	0.173367	1.79816	0.0222639	1.0416	5.46281	8.86104	0
55	0	0.181034	0.603448	0.215517	0	8504.24	0.208416	1.80827	0.0134163	1.08589	5.51132	8.90764	0
55	0	0.0517241	0.155172	0.793103	0	8500.22	0.340506	1.83278	0.0427695	0.956134	5.42118	8.58584	0
55	0	0.160714	0.473214	0.366071	0	8504.22	0.208637	1.82304	0.0228303	1.07761	5.48272	8.85786	0
55	0	0.0775862	0.215517	0.706897	0	8496.86	0.333641	1.83136	0.0370493	0.906298	5.39951	8.54035	0
55	0	0.0178571	0.0803571	0.901786	0	8498.9	0.306455	1.82203	0.0565404	0.996702	5.39784	8.59463	0
55	0	0.0619469	0.327434	0.610619	0	8501.32	0.369616	1.85088	0.0279708	0.850657	5.4436	8.54549	0
55	0	0.0707965	0.238938	0.690265	0	8496.45	0.338502	1.83193	0.0353188	0.872849	5.39773	8.51782	0
55	0	0.0614035	0.0438596	0.894737	0	8508.26	0.341644	1.85483	0.0605257	1.05275	5.47926	8.70524	0
55	0	0.0608696	0.121739	0.817391	0	8503.73	0.349281	1.8422	0.0458649	0.979211	5.44472	8.62299	0
55	0	0.0517241	0.0862069	0.862069	0	8504.49	0.339816	1.84295	0.0540762	1.00647	5.44585	8.64323	0
55	0	0.166667	0.561404	0.27193	0	8505.39	0.210273	1.81855	0.0168392	1.08105	5.49792	8.88228	0
55	0	0.0347826	0.695652	0.269565	0	8544.82	0.386534	1.9726	0.00982724	1.14547	5.75843	9.02547	0
55	0	0.0956522	0.573913	0.330435	0	8542.71	0.381505	1.92338	0.02108	1.15743	5.74226	9.0762	0
55	0	0.079646	0.318584	0.60177	0	8498.45	0.357363	1.84303	0.0277222	0.84133	5.418	8.51788	0
56	0	0	0.640351	0.359649	0	8166.5	0.278929	1.54645	0.0180417	0.406133	0.184052	0.979995	1.22606
56	0	0	0.886957	0.113043	0	8435.68	0.67561	0.623535	0.00245996	0.249522	0.0817338	0.319809	1.12545
56	0	0	0.973451	0.0265487	0	8360.18	0.496633	0.588669	0.000434783	0.306597	0.135535	0.592773	1.1377
56	0.132743	0.185841	0.610619	0.0176991	0	8397.91	0.540319	0.735504	0.0142163	0.0803167	0.0536462	0.554494	1.10793
56	0.0603448	0.0862069	0.75	0.0862069	0	8409.81	0.631038	0.721685	0.00915096	0.12187	0.0546402	0.455865	1.10425
56	0	0.0172414	0.87931	0.103448	0	8433.4	0.595799	0.703493	0.00252527	0.289676	0.0675306	0.300902	1.06664
56	0	0.079646	0.902655	0.0176991	0	8432.96	0.547931	0.884634	0.00197368	0.267337	0.130109	0.477159	0.989212
56	0	0.0707965	0.929204	0	0	8429.88	0.501283	0.889191	0.00172414	0.306572	0.158009	0.461966	0.990556
56	0	0.0172414	0.974138	0	0	8438.53	0.7034	0.960638	0.000215517	0.328003	0.239648	0.81062	0.910046
56	0	0.0344828	0.853448	0.112069	0	8417.6	0.552464	1.3091	0.00381474	0.600774	0.566536	0.976871	0.903982
56	0	0.0442478	0.840708	0.115044	0	8413.76	0.580671	1.27408	0.00451845	0.625968	0.551273	0.998124	0.90352
56	0	0.112069	0.672414	0.0775862	0.103448	8330.47	0.238386	2.81852	0.0102982	0.248165	0.4495	1.53097	1.0582
57	0	0	0.640351	0.359649	0	8166.5	0.278929	1.54645	0.0180417	0.406133	0.184052	0.979995	1.22606
57	0	0	1	0	0	8233.25	0.629545	0.651742	0	1.37156	0.133744	0.915943	1.39304
57	0	0	0.921739	0.0782609	0	8221.89	0.844936	0.851768	0.00175439	1.15374	0.104301	0.858529	1.46748
57	0	0	0.973684	0.0263158	0	8222.96	0.711732	0.82013	0.000877193	1.2203	0.0575398	0.876153	1.40658
57	0	0	0.853448	0.146552	0	8240.08	0.61287	0.492465	0.00412904	1.50565	0.238949	0.812606	1.3852
57	0	0	0.920354	0.079646	0	8223.54	0.774873	0.82593	0.00172414	1.20275	0.0656683	0.877892	1.44078
57	0	0	0.947826	0.0521739	0	8234.65	0.833518	0.647593	0.000646552	1.35666	0.081366	1.01079	1.49406
57	0	0	0.921053	0.0789474	0	8233.23	0.88447	0.670279	0.0012931	1.33297	0.0645998	1.0271	1.51923
57	0	0.0347826	0.878261	0.0869565	0	8165.2	0.0647801	1.40837	0.00245996	0.742126	0.102888	0.705132	1.35206
57	0	0.0347826	0.921739	0.0434783	0	8163.65	0.0546625	1.43962	0.00173913	0.69125	0.0755432	0.730594	1.32976
57	0.86087	0.121739	0	0	0.0173913	8151.08	0.036313	2.44587	0.17237	0.00347826	0.853345	1.11915	0.580793
57	0.603448	0.189655	0.0344828	0.0517241	0.103448	8152.97	0.0866796	2.4124	0.110041	0.0137747	1.06525	1.35444	0.633804
58	0	0	0.640351	0.359649	0	8166.5	0.278929	1.54645	0.0180417	0.406133	0.184052	0.979995	1.22606
58	0	0.0948276	0.405172	0.5	0	8334.55	0.136158	3.55391	0.0206104	0.176458	1.66831	1.71683	0.0470835
58	0	0.0353982	0.911504	0.0530973	0	8527.8	0.675076	1.78568	0.00274651	0.690604	0.968253	3.23854	0.0626814
58	0	0.0782609	0.182609	0.73913	0	8357.63	0.0813069	3.47813	0.0446683	0.432256	1.49849	2.00348	0.0227458
58	0.0608696	0.104348	0.33913	0.495652	0	8325.17	0.114745	3.54205	0.0209036	0.125914	1.6732	1.66019	0.0745091
58	0	0	0.798246	0.201754	0	8338.28	0.0548531	3.56743	0.00527178	0.43323	1.76241	2.12943	0.000726546
58	0	0.327586	0.362069	0.310345	0	8321.1	0.162741	3.5432	0.0423898	0.323442	1.88394	1.99563	0
58	0	0.327434	0.265487	0.40708	0	8317	0.150973	3.53113	0.0494565	0.279908	1.81313	1.93738	8.70739e-05
58	0	0.00869565	0.521739	0.469565	0	8341.84	0.145212	3.58591	0.0177728	0.240417	1.91998	2.29014	0
58	0	0.0707965	0.159292	0.769912	0	8367.33	0.0635973	3.41012	0.0417675	0.470778	1.41977	2.06775	0.032946
58	0	0.0701754	0.464912	0.394737	0.0701754	8391.32	0.115841	3.34911	0.0196571	0.307562	1.32733	1.96393	0.0434099
58	0	0.125	0.508929	0.366071	0	8304.19	0.0475014	3.61927	0.0155704	0.148873	1.72452	1.77754	0.024152
58	0	0.00877193	0.377193	0.561404	0	8367.57	0.172228	3.43173	0.0220459	0.206368	1.47863	1.78505	0.0397655
58	0	0	0.460177	0.539823	0	8379.78	0.166595	3.41309	0.0249809	0.281353	1.41524	1.88948	0.0325748
58	0.0172414	0.336207	0.508621	0.0948276	0	8307.98	0.0515483	2.7006	0.022092	0.0893292	1.733	2.91546	0.00283966
58	0	0.121739	0.443478	0.417391	0.0173913	8419.41	0.0623348	2.90971	0.0171525	0.602991	1.06041	2.47907	0.086278
58	0	0.22807	0.394737	0.368421	0	8378.36	0.0687144	2.21768	0.0222021	0.207426	1.34224	3.54785	0.0948339
59	0	0.079646	0.902655	0.0176991	0	8184.98	0.0731634	1.06879	0.00182918	0.551499	0.0537443	1.22836	1.3646
59	0	0	0.631579	0.324561	0	8169.37	0.238885	1.62303	0.0125695	0.216667	0.0738065	0.39395	0.914742
59	0	0.19469	0.460177	0.300885	0.0265487	8704.24	0.298136	0.593051	0.023895	0.229377	0.0545544	3.15108	1.09815
59	0	0.241379	0.258621	0.387931	0.0689655	8660.73	0.101632	0.593123	0.0378741	0.38009	0.0509468	3.0503	1.11906
59	0	0.210526	0.482456	0.307018	0	8721.41	0.248426	0.550637	0.0183529	0.269445	0.0565607	3.21292	1.09651
59	0	0	0.948276	0.0517241	0	8315.01	0.263602	1.57947	0.000976596	0.30451	0.383817	1.96637	1.15227
59	0	0.241379	0.267241	0.353448	0.0689655	8686.07	0.10855	0.557496	0.0458065	0.347871	0.0500054	3.13539	1.10952
59	0.594828	0.112069	0.137931	0.103448	0.0517241	8208.16	0.258642	2.32633	0.0725953	0.0180043	1.46015	4.01184	0.0734445
59	0	0	0.93913	0.0608696	0	8407.45	0.244048	1.40191	0.00176991	0.230239	0.630218	0.86792	0.921784
59	0	0.191304	0.417391	0.382609	0	8694.75	0.151419	0.562873	0.0282503	0.338971	0.0531125	3.14596	1.10872
59	0	0.115044	0.486726	0.371681	0.0176991	8680.97	0.16299	0.591625	0.0208179	0.350491	0.0511095	3.09601	1.11334
59	0	0.226087	0.269565	0.391304	0.0608696	8680.93	0.106109	0.566546	0.0441081	0.354622	0.0501719	3.11779	1.11146
59	0.477876	0.0884956	0.345133	0.079646	0	8187.77	0.0940507	1.45792	0.037472	0.0309268	0.265121	1.80018	1.12431
59	0	0.166667	0.236842	0.526316	0	8436.5	0.0991654	0.959307	0.0329928	0.558535	0.19561	2.36441	1.24494
60	0	0	0.284483	0.612069	0	8074.56	0.193119	1.57209	0.0338208	2.8044	1.78159	1.74946	0.0201438
60	0	0	0.814159	0.185841	0	8465.51	0.499184	1.50983	0.00648444	0.982085	5.06341	9.28504	0
60	0	0	1	0	0	8621.23	0.121024	1.63362	0	0.369847	4.9187	10.0111	0
60	0	0	0.931034	0.0689655	0	8624.57	0.203995	1.74978	0.00162592	0.616457	5.01881	9.79752	0
60	0	0	0.893805	0.106195	0	8649.43	0.297243	1.72769	0.00221239	0.654704	5.13119	9.8338	0
60	0	0	0.973913	0.026087	0	8653.45	0.253365	1.79347	0.000646552	0.55541	5.10533	9.93175	0
60	0	0	0.896552	0.103448	0	8635.49	0.251055	1.73366	0.00219298	0.643706	5.0715	9.80784	0
60	0	0	0.87069	0.12931	0	8086.72	0.0883844	1.31876	0.00411032	2.99041	1.54265	1.49984	0.129502
60	0	0	0.787611	0.212389	0	8566.39	0.0909255	1.70805	0.00561876	0.500622	4.68106	9.82717	0
60	0	0.0172414	0.87931	0.103448	0	8569.35	0.11039	1.63249	0.00281325	0.421069	4.62573	9.92239	0
60	0	0	0.974138	0.0258621	0	8639.8	0.237913	1.78444	0.000652174	0.572937	5.06317	9.87519	0
60	0	0	0.904348	0.0956522	0	8622.05	0.174747	1.78336	0.00252527	0.549391	4.97635	9.84411	0
61	0	0	0.446429	0.553571	0	8076.03	0.162155	1.51551	0.0237176	2.62693	1.83338	1.80797	0
61	0	0	1	0	0	8512.32	0.654417	1.75417	0	2.21686	9.55075	10.8495	0
61	0	0	1	0	0	8548.77	0.307099	1.59763	0	2.3217	10.0002	10.9549	0
61	0	0	0.99115	0.00884956	0	8526.54	0.173806	1.67423	0.000215517	2.23096	10.0576	10.8671	0
61	0	0.0172414	0.922414	0.0603448	0	8364.14	0.0626491	1.9495	0.00193966	1.95807	11.4244	12.7924	0
61	0	0	0.843478	0.156522	0	8377.73	0.0989591	1.88279	0.00439962	0.842065	8.89427	9.47456	0
61	0	0.0344828	0.577586	0.198276	0	8268.2	0.0694664	3.03078	0.0231886	0.538717	13.2102	14.7149	0
62	0	0	0.12069	0.689655	0	8073.54	0.221531	1.50291	0.0665395	2.71371	1.67475	1.64375	0.0729808
62	0	0	0.921739	0.0782609	0	8091.73	0.297032	1.67146	0.00181341	2.24267	5.0203	4.96909	0
62	0	0	1	0	0	8011.33	0.212823	1.95032	0	1.57689	2.36669	7.82289	0
62	0	0	1	0	0	8022.92	0.25248	1.85918	0	1.72318	2.46339	7.92682	0
62	0	0	1	0	0	8036.72	0.253969	1.72719	0	1.81341	2.71658	7.85501	0
62	0	0	1	0	0	8244	0.368452	1.2366	0	2.47337	6.29095	6.27108	0
62	0	0	1	0	0	8336.65	0.27215	1.35866	0	1.07289	7.39288	7.6213	0
62	0	0.315789	0.0701754	0.236842	0	8318.48	0.232843	1.75881	0.0778365	0.183166	8.23583	8.54636	0
62	0	0	1	0	0	8263.33	0.428813	1.19773	0	2.08653	6.54351	6.68714	0
62	0	0	1	0	0	8237.5	0.160817	1.13123	0	2.51863	5.9385	6.29142	0
62	0	0	1	0	0	8138.05	0.168568	3.607	0	0.204446	6.58527	7.78244	0
62	0	0	1	0	0	8286.81	0.289796	1.26427	0	2.18517	6.13757	6.67808	0
62	0	0	1	0	0	8181.03	0.191606	1.49645	0	3.15348	5.61609	5.5938	0
62	0	0	0.982759	0.0172414	0	8192.51	0.347496	1.48929	0.000215517	3.06395	5.7027	5.68332	0
62	0	0	0.973913	0.026087	0	8192.82	0.337884	1.48277	0.000215517	3.07504	5.69449	5.6752	0
62	0	0	1	0	0	8250.77	0.399662	1.21175	0	2.3585	6.41918	6.40193	0
62	0.0701754	0.27193	0.245614	0.236842	0.0438596	8116.89	0.097003	3.98266	0.048996	0.0770467	6.34249	7.63141	0
62	0	0	1	0	0	8128.47	0.24374	3.85383	0	0.250887	6.58784	7.82836	0
62	0	0	0.982759	0.0172414	0	8106.19	0.0673364	3.78088	0.000217391	0.385546	5.10357	6.52212	0
62	0	0	0.732759	0.0862069	0	8186.43	0.0797323	2.23308	0.00675059	1.27435	7.04598	8.01152	0
62	0.267241	0.181034	0.362069	0.0948276	0.0948276	8106.52	0.0912051	3.78584	0.0503238	0.0642662	6.80415	8.16726	0
62	0.469027	0.123894	0.230088	0.0353982	0.123894	8103.35	0.0279309	3.80578	0.0452128	0.0227415	6.21386	7.59769	0
63	0	0	0.73913	0.26087	0	8073.04	0.0793084	1.66322	0.00721666	2.96234	1.80049	1.76392	0.0157067
63	0	0	1	0	0	8017.23	0.378515	1.83824	0	1.19339	0.951805	2.70697	0.107309
63	0	0	1	0	0	7984.86	0.164336	2.76534	0	0.939023	1.20773	3.03234	0.0287011
64	0	0	0.73913	0.26087	0	8073.04	0.0793084	1.66322	0.00721666	2.96234	1.80049	1.76392	0.0157067
64	0	0	1	0	0	7976.07	0.186444	1.8977	0	1.48848	2.51268	4.32839	0
64	0	0	1	0	0	7960.59	0.0869463	2.00289	0	1.49574	2.44403	4.26483	0
64	0	0	0.965217	0.0347826	0	8000.42	0.522624	3.39319	0.000877193	0.970501	1.87512	3.81451	0
64	0	0	0.964912	0.0350877	0	7985.38	0.441472	3.62105	0.000862069	0.853036	1.90727	3.84815	0
64	0	0	1	0	0	8053.15	0.817649	2.4477	0	1.214	1.50149	3.43381	0.0210289
64	0	0	0.991304	0.00869565	0	7993.05	0.455921	3.47387	0.000431034	0.943264	1.944	3.88388	0
64	0	0	1	0	0	8095.26	0.231148	1.5381	0	2.70337	1.94834	1.8946	0
64	0	0	1	0	0	8040.15	0.796549	2.60819	0	1.16773	1.57213	3.50617	0.0134683
64	0	0	1	0	0	8040.15	0.796549	2.60819	0	1.16773	1.57213	3.50617	0.0134683
64	0	0	1	0	0	7953.01	0.121269	2.46888	0	1.26602	2.60076	4.44879	0
64	0	0	0.778761	0.221239	0	7942.73	0.0761735	3.02181	0.00969935	1.18849	2.50973	4.40674	0
64	0	0	0.964602	0.0353982	0	7952.86	0.132152	3.89259	0.00109649	0.728763	2.27476	4.21546	0
64	0	0	0.628319	0.371681	0	7951.04	0.172654	4.33881	0.0122892	0.439051	1.77217	3.66227	0.000400213
64	0	0	0.876106	0.123894	0	7984.81	0.419957	3.88407	0.00350877	0.706487	1.79616	3.73041	0.000128601
65	0	0	0.991304	0.00869565	0	8064.43	0.200484	1.9729	0.000215517	3.27101	2.12118	2.08214	0
65	0	0	0.939655	0.0603448	0	8113.22	0.0969584	1.7264	0.0012931	0.993955	0.490894	1.27942	0.334197
65	0	0	0.752212	0.247788	0	8107.49	0.160302	1.67292	0.00670183	1.15639	0.421624	1.10545	0.334197
65	0	0	0.603448	0.396552	0	8083.82	0.22744	1.62867	0.0132412	1.30815	0.0884728	0.978982	0.334197
65	0	0	1	0	0	8106.48	0.0606515	1.71597	0	1.01868	0.210551	1.2375	0.334197
65	0	0	1	0	0	8112.62	0.0740096	1.71381	0	0.821412	0.409052	1.4299	0.334197
65	0	0	1	0	0	8079.19	0.0991688	1.63484	0	1.41466	2.47495	2.56633	0
65	0	0	0.224138	0.775862	0	8094.35	0.348153	1.32806	0.042244	2.00192	1.73906	1.7936	0.0122597
65	0	0	1	0	0	8190.16	0.154041	0.873211	0	0.968131	2.79995	3.48889	0
65	0	0	1	0	0	8187.81	0.189461	0.984298	0	1.39325	3.12384	3.58245	0
65	0	0	1	0	0	8205.42	0.420064	0.783251	0	0.787903	3.10106	3.87112	0
65	0	0	0.734513	0.265487	0	8104.32	0.242499	1.6454	0.00691922	1.23984	0.447595	1.02793	0.334197
65	0	0	0.964912	0.0350877	0	8096.54	0.222633	1.37081	0.000869565	1.82656	2.05585	2.15613	0
65	0	0	0.817391	0.182609	0	8086.61	0.358402	1.44956	0.00709505	1.64324	2.12233	2.18287	0
65	0	0	0.0526316	0.947368	0	8091.01	0.165142	1.0147	0.0870744	2.00522	1.60355	1.59258	0.12358
66	0	0	0.922414	0.0775862	0	8065.39	0.231506	2.01026	0.00176991	3.33364	2.26542	2.2273	0
66	0	0.0701754	0.692982	0.192982	0	8101.02	0.0783457	2.06713	0.00927932	0.16593	2.70267	4.18519	0
66	0	0.0344828	0.784483	0.163793	0	8229.31	0.0667817	1.33467	0.00642244	2.08421	6.28244	6.52493	0
66	0	0	1	0	0	8247.68	0.127683	1.28099	0	1.89466	6.39993	6.71006	0
66	0	0	1	0	0	8300.18	0.186588	1.26724	0	1.85069	7.13201	7.1714	0
66	0	0	1	0	0	8339.29	0.278119	1.35689	0	1.12118	7.38065	7.59442	0
66	0	0.321739	0.0782609	0.234783	0	8318.48	0.232843	1.75798	0.0767711	0.181719	8.23583	8.54636	0
66	0	0	0.948276	0.0517241	0	8324.88	0.148818	1.24355	0.0012931	1.62791	7.0331	7.16869	0
66	0	0	0.921053	0.0789474	0	8255.32	0.143795	1.30477	0.00173195	2.01032	6.45419	6.64275	0
66	0.0350877	0.0877193	0.482456	0.254386	0.0526316	8122.73	0.0824376	3.96097	0.02295	0.0833802	6.34378	7.59447	0
66	0	0	1	0	0	8280.72	0.296195	1.20578	0	2.23898	6.63955	6.62371	0
66	0	0	1	0	0	8230.12	0.0762338	1.21757	0	2.44733	6.52068	6.50669	0
66	0	0	1	0	0	8288.85	0.182771	1.32976	0	2.13326	6.89752	6.88517	0
66	0	0	1	0	0	8295.91	0.33323	1.18805	0	1.33762	6.89285	7.80423	0
66	0	0	1	0	0	8292.21	0.449372	1.18105	0	2.07028	6.71982	6.75785	0
66	0	0	0.991379	0.00862069	0	8108.6	0.0733699	3.71871	0.000217391	0.233353	5.62918	7.05484	0
66	0.415929	0.20354	0.230088	0.0530973	0.0973451	8104.04	0.064925	3.75043	0.0735589	0.0405903	6.85262	8.21681	0
66	0.0775862	0.198276	0.525862	0.0258621	0.12931	8118.96	0.0719873	3.85645	0.0248281	0.0863064	6.12951	7.45979	0
67	0	0	0.912281	0.0877193	0	8064.71	0.204621	2.02967	0.00221239	3.38219	2.32139	2.28307	0
67	0	0.0442478	0.938053	0.0176991	0	8192.61	0.0861065	1.0733	0.00111607	1.91652	5.1041	7.22748	0
67	0	0.0782609	0.878261	0.026087	0	8185.7	0.071383	1.07617	0.00263158	1.99187	5.12268	7.14714	0
67	0	0	1	0	0	8289.27	0.167506	1.38614	0	1.46638	4.58164	8.3166	0
67	0	0	1	0	0	8291.28	0.410087	1.20895	0	1.23032	5.60903	7.59262	0
67	0	0	1	0	0	8293.15	0.324676	1.1906	0	1.25925	5.72006	7.53534	0
67	0	0	1	0	0	8213.03	0.313375	1.02674	0	2.64514	5.62487	6.31137	0
67	0	0.0517241	0.931034	0.0172414	0	8194.24	0.064664	1.07627	0.00132743	1.9338	5.05601	7.24622	0
67	0	0	0.99115	0.00884956	0	8218.4	0.20108	1.09133	0.000219298	1.75046	5.29182	7.26419	0
67	0	0	0.982301	0.0176991	0	8286.14	0.318622	1.19202	0.000215517	1.33617	5.62496	7.48778	0
67	0	0	1	0	0	8292.77	0.405894	1.20539	0	1.22297	5.6262	7.59505	0
67	0	0	1	0	0	8369.23	0.337545	1.20718	0	0.569289	6.03613	8.17693	0
67	0.0619469	0.221239	0.672566	0	0.00884956	7904.41	0.0687964	3.46133	0.0104261	0.112219	0.126776	8.04257	0.149147
68	0	0	0.939655	0.0603448	0	8061.57	0.194376	2.01492	0.00131579	3.46747	2.2831	2.2406	0
68	0	0	1	0	0	8020.46	0.228995	1.88961	0	1.69078	2.42959	7.9185	0
68	0	0	1	0	0	7948.76	0.314999	2.93045	0	0.313399	3.35026	6.13597	0
68	0	0.0530973	0.495575	0.451327	0	8370.81	0.228816	1.28614	0.0161685	1.08474	1.06575	10.3236	0.0673845
68	0.681416	0.0442478	0.123894	0.079646	0.0707965	7880.35	0.0581252	3.3196	0.0934559	0.0142475	2.4574	8.83218	0
68	0	0	0.634783	0.365217	0	8689.51	0.603387	1.58087	0.0108588	0.668194	1.43203	10.5705	0.043822
68	0	0	0.684211	0.315789	0	8639.29	0.54195	1.70877	0.00868688	0.690584	1.32787	10.4189	0.0608959
68	0	0	0.741379	0.258621	0	8617.03	0.51547	1.73784	0.00654132	0.712634	1.28204	10.3632	0.0651557
68	0	0.0263158	0.394737	0.491228	0	8674.03	0.679402	1.52004	0.0222998	0.552173	1.57574	10.7186	0.0177819
68	0	0	0.59292	0.40708	0	8536.68	0.553027	1.81164	0.0143783	0.629929	1.28697	10.3053	0.0662715
68	0	0	1	0	0	8109.01	0.0792572	1.32902	0	1.0185	0.331044	9.6282	0.0673845
68	0	0.0517241	0.646552	0.301724	0	8288.79	0.0958592	1.17457	0.0108944	1.23116	0.885048	10.1653	0.0673845
68	0	0	0.896552	0.103448	0	8262.27	0.203538	1.37177	0.0023913	1.10833	0.699373	9.89985	0.0673845
68	0	0	0.723214	0.276786	0	8656.64	0.544979	1.66991	0.00794237	0.708924	1.34294	10.4501	0.058657
68	0	0.026087	0.382609	0.391304	0	8670.42	0.694547	1.49638	0.0247717	0.539556	1.60319	10.7553	0.0134556
69	0	0	1	0	0	8392.99	0.40084	1.79901	0	0.874779	0.887564	2.31945	0.149963
70	0	0	1	0	0	8382.18	0.315547	1.77151	0	0.654951	1.37936	2.21089	0.135149
70	0	0	1	0	0	8184.43	0.256828	1.76617	0	0.463244	1.59073	3.64258	0.0204855
70	0.413793	0.0172414	0.37931	0.137931	0.0172414	8028.48	0.032964	2.99894	0.0325466	0.0356173	0.555046	2.87652	0.157079
70	0	0	1	0	0	8073.61	0.348412	2.80954	0	0.498153	1.82501	2.06227	7.33837e-06
70	0	0	1	0	0	8178.26	0.338899	1.04409	0	1.50365	1.75566	2.80565	0.00130359
70	0	0	1	0	0	8211.93	0.513307	0.870153	0	1.69674	1.5965	2.79094	0.0306799
70	0	0	1	0	0	8162.11	0.581584	1.41933	0	1.29056	2.02054	3.10851	0
70	0	0	1	0	0	8170.69	0.661327	1.10032	0	1.5174	1.83713	3.09325	0
70	0	0	1	0	0	8165.02	0.595192	1.35552	0	1.31285	2.00022	3.10582	0
70	0	0.0175439	0.815789	0.166667	0	8193.66	0.321237	1.15923	0.00527014	2.04068	1.25492	3.07085	0.387246
70	0	0	0.956897	0.0431034	0	8069.73	0.205155	2.82554	0.00110619	0.187118	1.36125	2.59157	0.165225
71	0	0	1	0	0	8331.78	0.597486	2.06674	0	0.637678	3.04261	11.4323	0
71	0	0.0173913	0.834783	0.0782609	0.0695652	8590.24	0.137104	1.55435	0.00405785	0.344473	0.0379853	0.279608	0.862594
71	0	0	0.930435	0.0695652	0	8597.07	0.201012	1.59864	0.00138237	0.38265	0.0381618	0.282294	0.867705
71	0	0.12931	0.344828	0.0344828	0.353448	8562.97	0.0579235	1.50357	0.0322051	0.250385	0.113604	0.353574	0.850114
71	0.681034	0.0775862	0.189655	0.0344828	0.0172414	8512.72	0.0441884	1.71553	0.092872	0.0171228	0.475583	1.07089	0.749704
72	0	0	1	0	0	8327.12	0.572778	2.03543	0	0.718556	2.94139	11.4527	0
72	0	0	0.938053	0.0619469	0	8284.25	0.207097	1.94193	0.00202893	0.911448	2.58468	11.64	0
72	0	0	1	0	0	8301.53	0.392249	1.99052	0	0.855043	2.72171	11.4632	0
72	0	0	1	0	0	8300.84	0.123255	1.49526	0	1.22735	2.88001	12.0584	0
72	0	0	1	0	0	8306.83	0.426443	2.00021	0	0.852675	2.76584	11.4792	0
72	0	0	1	0	0	8309.09	0.445769	2.00289	0	0.838403	2.78101	11.4627	0
72	0	0	1	0	0	8311.88	0.316937	1.82046	0	1.01224	2.86327	11.7737	0
72	0.0619469	0	0.884956	0.0530973	0	8445.97	0.123814	1.59232	0.00298026	0.107491	1.59095	11.9124	0.0170971
72	0.327586	0	0.612069	0.0603448	0	8442.25	0.0839111	1.62257	0.0193363	0.0592242	1.64777	11.9297	0.0105583
72	0.0265487	0.123894	0.495575	0.353982	0	8227.7	0.0628167	1.84182	0.0165409	0.0903553	3.50502	10.9815	0
72	0.026087	0.130435	0.486957	0.356522	0	8227.25	0.0604426	1.83024	0.0175815	0.0923681	3.51661	10.9857	0
72	0.026087	0.130435	0.486957	0.356522	0	8227.25	0.0604426	1.83024	0.0175815	0.0923681	3.51661	10.9857	0
73	0	0	1	0	0	8334.66	0.347449	1.3531	0	1.00085	3.09531	11.9569	0
73	0	0	0.982759	0.0172414	0	8613.54	0.192972	2.3435	0.000431034	0.464561	3.59233	12.8488	0
73	0	0	0.982759	0.0172414	0	8617.12	0.210891	2.32783	0.000446429	0.472911	3.5761	12.8558	0
73	0	0	0.982759	0.0172414	0	8482.13	0.400448	0.989234	0.000442478	1.65113	3.99198	12.7742	0
73	0	0	1	0	0	8631.36	0.400721	2.36541	0	0.599135	3.67497	12.6844	0
73	0	0.0176991	0.955752	0.0265487	0	8648.86	0.223203	2.5424	0.000862069	0.689114	3.9632	12.3386	0
73	0	0	1	0	0	8629.29	0.306728	2.41614	0	0.463356	3.80576	12.5895	0
73	0	0	0.982301	0.0176991	0	8643.7	0.0846077	2.51859	0.000442478	0.344404	4.06553	12.344	0
73	0	0	1	0	0	8658.93	0.129228	2.56071	0.000438596	0.403361	4.27617	12.1206	0
73	0.0948276	0.232759	0.396552	0.275862	0	8555.36	0.342331	2.21283	0.0326916	0.0578542	3.19014	12.9377	0
74	0	0	1	0	0	8342.12	0.522782	1.34896	0	0.635178	3.63775	11.9408	0
74	0	0	0.946903	0.0530973	0	8291.92	0.404157	1.97377	0.00108696	0.412068	3.09598	11.0933	0
74	0	0	0.965517	0.0344828	0	8333.83	0.575344	1.81705	0.000869565	0.629197	1.61903	10.3402	0.0051488
74	0	0	1	0	0	8302.72	0.134486	1.74349	0	1.03267	2.2743	9.51855	0
74	0	0	0.956897	0.0431034	0	8351.79	0.23906	1.77706	0.000862069	0.939175	2.13394	9.78796	0
74	0	0.0175439	0.912281	0.0701754	0	8293.18	0.0559315	1.96479	0.00208279	0.884431	2.3795	9.74792	0
74	0	0	1	0	0	8313.08	0.209801	1.45508	0	0.862213	2.05332	9.28921	0
74	0	0	1	0	0	8311.92	0.0727291	1.59818	0	1.05925	2.25726	9.44566	0
74	0	0	1	0	0	8292.79	0.164522	1.46223	0	0.711434	1.90433	9.16474	0
74	0.166667	0.0350877	0.614035	0.184211	0	8412.58	0.0832324	2.11567	0.0244265	0.0922161	1.23701	9.95272	0.0346605
74	0.184211	0.0438596	0.631579	0.140351	0	8412.36	0.0785113	2.1811	0.022386	0.0855885	1.2103	9.61305	0.0369004
74	0	0	1	0	0	8236.06	0.238271	2.12035	0	0.536159	1.78016	8.79368	0.000523993
74	0	0	0.956522	0.0434783	0	8298.37	0.104738	1.98436	0.000862069	0.847918	2.42779	9.70639	0
74	0	0	1	0	0	8553.87	0.200507	0.808151	0	1.01533	1.4728	6.83545	0.0207105
74	0	0	1	0	0	8323.19	0.112415	1.79743	0	1.06305	2.27861	9.63287	0
74	0	0	1	0	0	8335.65	0.146587	1.78426	0	1.06489	2.24408	9.63452	0
74	0	0	1	0	0	8438.3	0.275798	1.17001	0	0.95422	0.929601	9.78842	0.0369004
74	0	0.0173913	0.913043	0.0695652	0	8291.38	0.0552269	1.9631	0.00202893	0.867486	2.36738	9.7733	0
74	0	0.0175439	0.929825	0.0526316	0	8300.91	0.0676795	1.91572	0.00182918	0.931081	2.326	9.73528	0
74	0	0	1	0	0	8354.8	0.210623	1.35157	0	1.32305	2.1104	9.40557	0
74	0	0	1	0	0	8439.4	0.417087	1.49999	0	0.534388	0.768238	10.1804	0.0369004
74	0.113043	0.0347826	0.73913	0.113043	0	8414.08	0.0645065	2.06259	0.0118359	0.0866391	1.28349	10.18	0.0323271
75	0	0	1	0	0	8336.72	0.503126	1.34688	0	0.487254	3.67145	11.7817	0
75	0	0	0.905983	0.042735	0	8338.37	0.13299	1.48622	0.00199115	1.01813	4.91119	12.6581	0
75	0	0.0173913	0.93913	0.0434783	0	8369.79	0.130198	1.41545	0.00187817	1.28386	5.36852	12.3195	0
75	0	0.0347826	0.965217	0	0	8357.93	0.167366	1.55156	0.000663717	1.6327	5.28187	12.4729	0
75	0	0	0.991304	0.00869565	0	8345.15	0.0644476	1.36461	0.000219298	0.688837	4.97345	11.718	0
75	0	0	1	0	0	8369.85	0.198213	1.41027	0	0.978386	5.20661	11.7969	0
75	0	0	1	0	0	8344.48	0.0816551	1.37749	0	0.810262	5.09002	11.696	0
75	0	0	0.973913	0.026087	0	8328.12	0.0568055	1.35929	0.000646552	0.687697	4.96193	11.6491	0
75	0	0	1	0	0	8388.14	0.284529	1.42158	0	1.06657	5.2515	11.9544	0
75	0	0	1	0	0	8358.04	0.217895	1.41629	0	1.1995	5.32025	12.5151	0
75	0	0.112069	0.862069	0.0258621	0	8394.11	0.299078	1.42537	0.00445332	1.13132	5.24012	11.9814	0
75	0	0	1	0	0	8345.23	0.189683	1.45217	0	1.09737	5.19892	12.4925	0
75	0	0	0.964912	0.0350877	0	8325.06	0.0965262	2.51257	0.000862069	0.223465	4.19505	10.9482	0
75	0.114035	0	0.631579	0.184211	0.0263158	8272.89	0.0589125	1.39002	0.0124907	0.0799236	4.27436	11.7824	0
75	0	0	0.965217	0.0347826	0	8334.57	0.0646464	1.35818	0.000646552	0.652323	4.93306	11.6734	0
75	0	0	0.964286	0.0357143	0	8321.38	0.0570837	1.35616	0.000652174	0.676375	4.94229	11.6243	0
75	0	0	0.973913	0.026087	0	8328.9	0.0562125	1.35942	0.000663717	0.687697	4.96138	11.6502	0
75	0	0	0.931034	0.0689655	0	8369.28	0.216361	1.36861	0.00131579	1.29444	4.92947	11.6883	0
75	0	0	1	0	0	8359.2	0.247194	1.41417	0	1.11375	5.24525	12.453	0
75	0	0	1	0	0	8343.37	0.0590045	1.3692	0	0.748401	5.0323	11.7058	0
75	0	0	1	0	0	8359.15	0.160676	1.5447	0	1.11797	4.69881	12.8561	0
75	0	0	0.86087	0.13913	0	8455.75	0.169987	1.94384	0.00554837	0.932372	4.38768	11.6413	0
76	0	0.289474	0.438596	0.192982	0	8344.99	0.127623	1.47921	0.0234737	0.70884	4.05163	12.3947	0
76	0	0	0.929825	0.0701754	0	8330.74	0.0583081	1.4886	0.00159789	1.3345	5.37885	12.7178	0
76	0	0	0.974138	0.0258621	0	8375.57	0.055934	1.46225	0.000438596	2.07986	5.28864	12.1327	0
76	0	0.0614035	0.885965	0.0526316	0	8390.03	0.154998	1.36248	0.00280172	2.09709	5.17552	11.9578	0
76	0	0.175439	0.447368	0.377193	0	8446.95	0.247681	1.07936	0.0191999	1.63876	4.74799	11.47	0
76	0	0.19469	0.566372	0.238938	0	8413.28	0.338041	1.12035	0.0138117	1.58395	4.85448	11.415	0
76	0	0.19469	0.566372	0.238938	0	8413.28	0.338041	1.12035	0.0138117	1.58395	4.85448	11.415	0
76	0	0.284483	0.172414	0.543103	0	8468.68	0.197798	1.14067	0.0444695	1.54423	4.61965	11.3673	0
76	0	0.130435	0.495652	0.373913	0	8541.31	0.321247	1.17915	0.0165256	1.97049	4.52814	11.8581	0
76	0	0.00869565	0.582609	0.408696	0	8656.5	0.199065	1.72751	0.0127669	0.944373	3.63446	10.8769	0
77	0	0	1	0	0	7974.61	0.0586878	2.28668	0	0.840925	0.0596975	2.88581	0.71707
77	0	0.0438596	0.95614	0	0	7947.65	0.188078	4.89245	0.00107759	0.413281	1.83741	3.19891	0
77	0	0	1	0	0	7983.04	0.170559	5.23851	0	0.307622	2.13	3.67109	0
77	0	0	1	0	0	7986.72	0.188487	5.27421	0	0.318967	2.1432	3.61198	0
77	0	0.0350877	0.938596	0.0263158	0	7945.56	0.138163	4.92733	0.00176991	0.222237	1.90724	3.52456	0
77	0.0175439	0.0175439	0.850877	0.114035	0	7927.16	0.090435	4.65951	0.00553567	0.154382	1.61317	3.48591	0.0086179
77	0	0	0.946903	0.0530973	0	7925.83	0.0996412	4.64259	0.0012931	0.199399	1.58808	3.44089	0.0110084
78	0	0	1	0	0	7952.52	0.067222	3.38406	0	0.727185	0.174473	3.82771	0.649331
78	0	0	1	0	0	7948.17	0.167336	3.46728	0	0.465066	0.419069	3.71964	0.605778
78	0	0	1	0	0	7950.51	0.0808163	3.46375	0	0.642552	0.285934	3.86476	0.62706
78	0	0	1	0	0	7938.17	0.0989139	3.15929	0	0.87544	0.0989075	3.93715	0.622098
78	0	0	1	0	0	7940.55	0.104431	3.14783	0	0.905248	0.115412	3.90409	0.628852
78	0	0	1	0	0	7934.2	0.0667027	3.32399	0	0.797488	0.232976	3.99471	0.625229
78	0	0	1	0	0	7933.51	0.0570346	3.36197	0	0.76182	0.261906	4.01149	0.623051
78	0	0	1	0	0	7954.8	0.133229	3.22703	0	0.796902	0.103563	3.75656	0.668259
78	0	0	1	0	0	7973.46	0.254426	3.00495	0	0.774254	0.259577	3.55321	0.707388
78	0	0	1	0	0	7958.11	0.181281	3.11893	0	0.812183	0.121876	3.68943	0.682949
78	0	0	1	0	0	7977.12	0.333233	2.29625	0	1.15781	0.0969001	3.09602	0.679784
78	0	0	1	0	0	7939.47	0.0652905	3.41654	0	0.706239	0.302012	3.99545	0.619895
78	0.482759	0.0258621	0.353448	0.137931	0	7907.89	0.0380012	4.03084	0.0433559	0.0350312	0.813311	4.41275	0.307507
78	0.543103	0.00862069	0.336207	0.112069	0	7905.66	0.0406331	4.05482	0.0490628	0.0303554	0.840789	4.43056	0.296296
78	0	0	1	0	0	7934.51	0.196557	3.74486	0	0.24611	0.718398	4.15967	0.429124
79	0	0	1	0	0	7973.07	0.267397	3.0391	0	0.736417	0.237098	3.60089	0.699422
79	0	0	1	0	0	7960.19	0.247674	2.51112	0	1.26304	0.0869154	3.36201	0.668573
79	0	0	1	0	0	7964.91	0.0876436	2.70066	0	0.928334	0.0972677	3.18803	0.711498
79	0	0	1	0	0	7934.3	0.0914764	3.23049	0	0.819346	0.117893	4.00133	0.613972
79	0	0	1	0	0	7932.25	0.0849114	3.25167	0	0.789729	0.109343	4.03739	0.607803
79	0	0	1	0	0	7944.46	0.116073	2.66262	0	1.20457	0.056314	3.60764	0.64995
79	0	0	1	0	0	7941.53	0.0891705	2.61046	0	1.18682	0.08106	3.62511	0.645074
79	0	0	1	0	0	7967.36	0.292816	2.49572	0	1.19049	0.147317	3.24109	0.681272
79	0	0	1	0	0	7973.65	0.359429	2.28351	0	1.21454	0.108129	3.14634	0.676406
79	0.157895	0.0263158	0.789474	0.0263158	0	7947.52	0.169354	3.5936	0.00911798	0.095625	0.500955	4.82517	0.192512
79	0.0350877	0.0350877	0.912281	0.00877193	0.00877193	7943.79	0.200794	4.25716	0.00233371	0.133143	0.253183	4.98096	0.1969
80	0	0	1	0	0	7975.97	0.310176	3.01772	0	0.695995	0.291989	3.55292	0.703453
80	0.00854701	0.042735	0.871795	0.0769231	0	7927.62	0.0600887	2.75476	0.00427149	0.146998	0.797883	2.99507	0.620103
80	0.424779	0.0265487	0.460177	0.0530973	0	7924.57	0.0499935	2.56488	0.0204224	0.0283337	0.357105	2.88495	0.708973
80	0	0	1	0	0	7977.89	0.346753	2.84318	0	0.568052	0.308113	3.33153	0.712716
80	0	0	0.849558	0.150442	0	7970.86	0.163071	2.59132	0.00369565	0.174424	0.24026	2.94667	0.709553
80	0	0	1	0	0	7960.65	0.254359	2.74756	0	0.268775	0.39874	3.0812	0.713097
80	0	0	0.991304	0.00869565	0	7957.93	0.231798	2.74064	0	0.244058	0.428974	3.05056	0.713918
80	0	0	0.973913	0.026087	0	7989.43	0.209212	2.69523	0.000442478	0.314553	0.220875	3.07725	0.708673
80	0	0	0.87069	0.12931	0	7985.67	0.190542	2.59479	0.00263158	0.287378	0.154555	2.90637	0.704447
80	0	0	0.87069	0.12931	0	7974.13	0.239775	2.50689	0.00267548	0.301326	0.0755071	2.75391	0.699908
80	0	0	1	0	0	7985.68	0.22693	2.81369	0	0.592453	0.174959	3.27994	0.718577
80	0	0	1	0	0	8000.34	0.187335	1.82442	0	1.16608	0.25523	2.70815	0.673069
80	0	0	1	0	0	7934.34	0.0565755	3.36468	0	0.765819	0.26021	3.9992	0.625154
80	0	0.0178571	0.973214	0.00892857	0	7927.66	0.217327	4.44351	0.000646552	0.298294	0.491228	5.26984	0.148943
81	0	0	0.298246	0.701754	0	8112.47	0.162486	0.799676	0.0266418	1.79453	4.0007	4.03392	0
81	0	0	0.866071	0.133929	0	8072.75	0.135382	3.10927	0.00350057	0.302953	3.35607	1.91678	0
81	0	0	1	0	0	8140.65	0.544565	2.76282	0	0.557775	3.63334	3.00799	0
81	0	0	1	0	0	8121.55	0.375932	3.00501	0	0.360759	3.61969	2.55648	0
81	0	0	1	0	0	8107.45	0.38877	3.05091	0	0.359365	3.66985	2.46962	0
81	0	0	0.948276	0.0517241	0	8081.21	0.0626055	2.96489	0.000877193	0.630713	3.76553	2.32108	0
81	0	0	1	0	0	8090.45	0.0641512	2.14048	0	1.0506	4.0094	2.84279	0
81	0	0	1	0	0	8089.42	0.14174	3.27601	0	0.311661	3.54123	2.0932	0
81	0	0	1	0	0	8085.24	0.103174	3.26692	0	0.285796	3.48017	2.03143	0
81	0	0	1	0	0	8082.94	0.0794695	3.25069	0	0.299457	3.48181	2.03307	0
81	0	0	0.893805	0.106195	0	8075.61	0.0432482	3.18211	0.00254923	0.331663	3.46732	2.02055	0
81	0	0	0.836207	0.163793	0	8075.45	0.0374913	3.12148	0.00416558	0.460406	3.59438	2.14846	0
81	0	0	1	0	0	8143.04	0.358813	2.85871	0	0.352927	3.40807	2.93639	0
81	0	0	0.982301	0.0176991	0	8107	0.524752	2.58647	0.000657895	0.748605	3.93434	2.95069	0
81	0	0	0.77193	0.22807	0	8094.64	0.0452725	1.69013	0.0069882	1.1955	3.96407	3.09241	0
81	0	0	0.877193	0.122807	0	8076.61	0.0601193	3.06202	0.00305939	0.498022	3.6011	2.15815	0
81	0	0	1	0	0	8084.78	0.0880772	3.2535	0	0.332096	3.53684	2.08809	0
81	0.0603448	0.0862069	0.344828	0.508621	0	8074.01	0.0516308	3.17332	0.0233035	0.129453	3.07557	1.64725	0.0758715
81	0.853448	0.0258621	0.0344828	0	0.00862069	8065.81	0.0216919	3.37994	0.144302	0.00396858	2.92805	1.48188	0.112809
82	0	0	0.371681	0.628319	0	8114.65	0.192389	0.810238	0.0232977	1.74893	4.03716	3.98606	0
82	0	0	1	0	0	8286.3	0.411057	0.445282	0	2.57139	3.10759	2.42527	0
82	0	0	0.798246	0.0789474	0	8220.39	0.055282	1.06736	0.00977765	2.34575	3.14554	2.87491	0
82	0	0	0.584071	0.256637	0	8230.98	0.0833019	1.07305	0.0276927	2.30764	3.05704	2.90698	0
82	0	0	0.946903	0.0530973	0	8212.55	0.0598043	0.934766	0.00130435	2.4888	3.2138	2.72466	0
82	0	0	0.930435	0.0695652	0	8212.38	0.0561041	0.958102	0.00109649	2.45963	3.19071	2.75728	0
82	0	0	0.930435	0.0695652	0	8212.38	0.0561041	0.958102	0.00109649	2.45963	3.19071	2.75728	0
82	0	0	0.930435	0.0695652	0	8212.38	0.0561041	0.958102	0.00109649	2.45963	3.19071	2.75728	0
82	0	0	0.433628	0.566372	0	8117.82	0.203483	0.843982	0.0187598	1.6516	4.10642	3.90824	0
82	0	0	0.948276	0.0517241	0	8212.49	0.0575239	0.944379	0.00130435	2.47674	3.20204	2.73949	0
82	0.706897	0.0517241	0.103448	0.137931	0	8150.63	0.226177	2.56664	0.0563596	0.00847278	0.58729	0.795191	0.536254
82	0	0	0.991228	0.00877193	0	8202.05	0.20597	1.74635	0.000221239	1.44273	1.30669	4.34818	0.0444125
82	0	0	0.869565	0.130435	0	8162.97	0.222886	2.43429	0.00396579	1.0005	1.58118	4.53151	0.0130456
82	0	0	0.86087	0.13913	0	8160.78	0.214124	2.45143	0.00403598	0.983838	1.59034	4.53373	0.0120412
82	0	0.0175439	0.605263	0.0175439	0	8151.96	0.0655332	2.56756	0.0232675	0.898747	1.43791	4.85979	0.0323648
82	0	0.0175439	0.710526	0.0175439	0	8157.35	0.0880286	2.49426	0.0153769	0.977241	1.38369	4.80924	0.0386553
82	0	0	0.973913	0.026087	0	8200.78	0.314806	1.89462	0.000434783	1.36741	1.40882	4.32033	0.0327783
82	0	0	0.973684	0.0263158	0	8200.59	0.315551	1.90745	0.000438596	1.363	1.40761	4.32549	0.0329248
82	0	0	0.974138	0.0258621	0	8200.81	0.307685	1.89462	0.000434783	1.37391	1.40403	4.31472	0.033324
83	0	0	0.371681	0.628319	0	8114.65	0.192389	0.810238	0.0232977	1.74893	4.03716	3.98606	0
83	0	0	1	0	0	8251.75	0.364944	1.64507	0	1.39585	2.79647	8.46019	0
83	0	0	1	0	0	8248.12	0.350369	1.31274	0	1.54057	3.08072	8.17182	0
83	0	0	1	0	0	8246.89	0.337699	1.38158	0	1.51416	3.09811	8.18453	0
83	0	0	1	0	0	8248.03	0.36723	1.37563	0	1.53242	3.06688	8.21116	0
83	0	0	1	0	0	8248.03	0.36723	1.37563	0	1.53242	3.06688	8.21116	0
83	0	0	1	0	0	8248.03	0.36723	1.37563	0	1.53242	3.06688	8.21116	0
83	0	0	1	0	0	8250.91	0.401024	0.947324	0	1.56004	3.10668	8.00511	0
83	0	0	1	0	0	8248.34	0.374028	1.36646	0	1.5363	3.05794	8.21415	0
83	0	0	1	0	0	8246.93	0.323834	1.05714	0	1.22285	3.44712	7.69908	0
83	0.210526	0.149123	0.45614	0.00877193	0.0263158	8174.17	0.0632644	2.06213	0.0441059	0.059145	3.34169	8.57135	0
83	0	0	1	0	0	8253.35	0.366527	1.48024	0	1.4817	2.82193	8.39032	0
83	0	0.0258621	0.913793	0.0344828	0	8199.54	0.119082	2.1453	0.0034113	1.03758	2.65422	8.78361	0
83	0	0.0263158	0.912281	0.0350877	0	8198.38	0.115248	2.14839	0.0034113	1.03504	2.65385	8.78884	0
83	0	0.0258621	0.922414	0.0344828	0	8200.73	0.120956	2.14265	0.00250312	1.03984	2.65686	8.78157	0
83	0	0	1	0	0	8248.92	0.344672	1.74004	0	1.34145	2.77921	8.51296	0
83	0	0	1	0	0	8251.98	0.363711	0.949193	0	1.63295	2.97292	8.13455	0
83	0	0	1	0	0	8263.81	0.52155	1.85983	0	0.823162	1.92073	8.99797	0
83	0.172414	0.103448	0.431034	0.12931	0.0431034	8173.31	0.318456	2.69977	0.0344171	0.0773131	1.92829	9.19875	0
83	0.284483	0.267241	0.318966	0.00862069	0.0862069	8185.65	0.0594312	2.78807	0.0542384	0.0519447	2.5361	9.53166	0
83	0.690265	0.150442	0	0	0.0353982	8169.43	0.0394077	2.66646	0.157643	0.00955608	2.54816	9.35567	0
84	0	0	0.303571	0.660714	0	8130.26	0.146841	0.91389	0.0347632	2.13306	3.51302	4.95119	0
84	0	0	1	0	0	8241.15	0.554921	2.0206	0	0.240108	0.101535	1.33232	1.33749
84	0.0434783	0.634783	0.173913	0.00869565	0.0782609	8197.49	0.105514	2.331	0.0491207	0.0898606	0.504637	1.17196	1.48985
84	0.079646	0.079646	0.619469	0.159292	0	8216.36	0.0416295	2.27592	0.0123276	0.0902916	0.38114	1.46195	0.87043
84	0	0.232759	0.491379	0.163793	0	8202.98	0.261083	2.18755	0.0156296	0.241191	0.431999	1.18965	1.47371
84	0	0.0175439	0.894737	0.0614035	0	8223.97	0.384541	2.04584	0.00245996	0.292227	0.350656	1.13403	1.47016
84	0	0.0175439	0.921053	0.0438596	0	8228.78	0.407499	2.03149	0.00201158	0.279897	0.325882	1.15115	1.45666
84	0	0	0.982143	0.0178571	0	8226.48	0.223831	2.10617	0.000434783	0.303333	0.062931	1.4716	1.04101
84	0	0.0344828	0.741379	0.224138	0	8227.45	0.0615856	2.07068	0.00769998	0.321712	0.296087	2.12435	0.574515
84	0.245614	0.122807	0.622807	0	0	8212.96	0.410761	2.21087	0.0183821	0.0653829	0.133043	1.40032	1.2999
84	0	0.0353982	0.840708	0.106195	0.0176991	8219.37	0.200934	2.0479	0.00341022	0.17219	0.160907	1.22612	1.10816
84	0.0353982	0.637168	0.168142	0	0.0884956	8198.19	0.12075	2.32673	0.0533682	0.087751	0.495787	1.17611	1.48583
85	0	0	0.610619	0.389381	0	8120.15	0.0687446	0.844108	0.0108065	2.19117	3.64769	4.61306	0
85	0	0	0.775862	0.224138	0	8257.91	0.801284	0.950957	0.00648444	0.720513	2.85302	2.12874	0
85	0	0	0.991379	0.00862069	0	8227.32	0.771444	0.962427	0.000431034	0.797187	2.98278	2.16928	0
85	0	0	0.852174	0.147826	0	8179.28	0.658754	1.0025	0.00375635	0.855833	3.03856	2.1473	0
85	0	0	0.517544	0.482456	0	8251.61	0.643302	2.07134	0.0159504	0.534014	2.25368	1.90748	0
85	0	0	1	0	0	8201.55	0.582738	1.45857	0.000221239	0.619007	2.53471	1.8676	0
85	0	0	1	0	0	8206.92	0.594014	1.50883	0	0.628891	2.52528	1.87595	0
85	0	0	0.429825	0.570175	0	8270.6	0.696984	1.86949	0.0193134	0.551919	2.41474	1.99132	0
85	0	0	0.62069	0.37931	0	8260.84	0.77604	0.930173	0.0132649	0.624332	2.93048	2.23812	0
85	0.310345	0.0862069	0.491379	0.112069	0	8108.11	0.145791	2.51392	0.0240498	0.036558	2.63694	1.51198	0.112809
86	0	0	0.815789	0.184211	0	8150.28	0.331093	0.917116	0.0062917	2.45051	3.36243	4.57078	0
86	0	0	0.991228	0.00877193	0	8105.61	0.105445	1.20734	0.000221239	3.09194	6.13808	7.48162	0
86	0	0.00869565	0.486957	0.0695652	0	8157.43	0.0502193	2.54723	0.0214292	0.775476	0.53369	5.75664	0.244236
86	0	0.0614035	0.833333	0.105263	0	8344.71	0.53628	0.700052	0.00301724	2.46728	1.17045	4.16804	0.078907
86	0	0.0530973	0.106195	0	0	8139.91	0.0548348	2.88165	0.0930539	1.08968	1.06741	5.4644	0.105687
86	0	0.12069	0	0	0	8128.3	0.138966	3.00929	0.205032	1.01221	1.23555	5.58083	0.0852543
86	0	0	0.778761	0.221239	0	8241.59	0.277834	1.35528	0.0078512	1.41555	0.236553	5.29719	0.220807
86	0	0.0438596	0.807018	0.149123	0	8226.2	0.359041	1.4305	0.00594934	1.38088	0.138767	5.26487	0.21219
87	0	0	0.974138	0.0258621	0	8370.32	0.189342	1.6916	0.000431034	0.480783	1.42679	2.34849	0.0645973
87	0	0	0.982759	0.0172414	0	8375.55	0.2589	1.46359	0.000431034	0.867285	0.105323	3.24893	0.759327
87	0	0	0.840708	0.0442478	0	8524.5	0.534296	1.44135	0.00604018	1.25962	0.488837	2.93209	0.964155
87	0	0	0.991379	0.00862069	0	8409.54	0.405269	1.47698	0.000221239	1.00977	0.247699	3.17845	0.886224
87	0	0	0.810345	0.0258621	0	8518.1	0.525272	1.45492	0.00779832	1.24318	0.466855	2.94007	0.931936
87	0	0	0.991228	0.00877193	0	8315.28	0.12998	1.46744	0.000221239	0.637473	0.0932091	3.02444	0.786051
87	0	0	1	0	0	8122.3	0.116115	3.74934	0	0.788794	2.31268	6.92986	0
87	0	0	0.955752	0.0442478	0	8388.94	0.231399	1.56312	0.00181341	1.05677	0.392916	3.08338	0.47749
87	0	0	0.973913	0.026087	0	8360.96	0.15865	1.50909	0.000657895	0.807809	0.0947213	3.29571	0.608873
87	0	0	0.973684	0.0263158	0	8320.54	0.0413591	1.43321	0.000223214	0.42207	0.30152	2.68512	0.771041
87	0	0	0.868421	0.131579	0	8291.89	0.244063	1.06864	0.00353755	1.11415	0.15411	2.38752	1.77408
88	0	0.0176991	0.982301	0	0	8423.1	0.505709	0.417531	0.000438596	0.740194	0.0548024	0.220563	1.06889
88	0	0	1	0	0	8411.26	0.318616	0.493574	0	0.726922	0.254598	0.465867	1.08898
88	0	0	1	0	0	8408.44	0.247106	0.598672	0	0.699168	0.391308	0.602079	1.15338
88	0	0	1	0	0	8404.28	0.205654	0.653218	0	0.729258	0.477811	0.687751	1.21861
88	0	0	1	0	0	8402.61	0.169225	0.580687	0	0.778315	0.429432	0.642513	1.13982
88	0	0	1	0	0	8399.71	0.130942	0.536388	0	0.845001	0.400845	0.632246	1.08399
88	0	0	1	0	0	8403.44	0.176575	0.530784	0	0.799559	0.377997	0.593957	1.08225
88	0	0	0.982456	0.0175439	0	8398.22	0.11795	0.611871	0.000755357	0.829066	0.47994	0.704388	1.17104
88	0	0	0.982456	0.0175439	0	8399.98	0.174606	0.494393	0.000223214	1.08197	0.373691	0.731862	1.07463
88	0	0	1	0	0	8407.75	0.300781	0.854465	0	0.537581	0.389239	0.62452	1.20857
88	0	0	1	0	0	8412.07	0.353648	0.59391	0	0.633565	0.184543	0.416347	1.12944
88	0	0	1	0	0	8414.72	0.507556	0.373009	0	1.42037	0.470624	0.886784	1.28405
88	0	0	1	0	0	8405.84	0.192503	0.439891	0	0.939745	0.284271	0.559554	1.03547
88	0.433628	0.079646	0.0442478	0.442478	0	8146.16	0.0804477	2.52564	0.0701503	0.0325462	0.804611	1.03374	0.514925
88	0.678261	0.0956522	0.173913	0.0521739	0	8152.2	0.183753	2.48154	0.0786007	0.0127171	0.71218	0.858949	0.52094
88	0	0	1	0	0	8410.22	0.307443	0.646756	0	0.626846	0.343409	0.564071	1.16151
88	0	0	1	0	0	8411.41	0.239761	0.410532	0	0.978616	0.232851	0.533941	1.05071
88	0	0	0.991379	0.00862069	0	8419.22	0.335103	0.3939	0.000221239	0.946004	0.145234	0.434754	1.07434
88	0	0	1	0	0	8410.8	0.229831	0.41202	0	1.01291	0.245924	0.571057	1.05978
88	0	0	1	0	0	8410.73	0.23446	0.412467	0	1.0587	0.259259	0.615189	1.07222
88	0	0	1	0	0	8408.66	0.240253	0.448628	0	0.835765	0.276784	0.497731	1.03443
88	0	0	1	0	0	8406.7	0.226205	0.62833	0	0.705532	0.43957	0.649773	1.19083
88	0	0	1	0	0	8233.95	0.679705	0.663879	0	1.36096	0.119275	0.940405	1.40879
88	0	0	0.965517	0.0344828	0	8373.65	0.979929	0.32472	0.00107759	1.97171	0.447368	1.10068	1.32508
88	0.0956522	0.0434783	0.252174	0.486957	0	8160.81	0.118246	1.72432	0.033238	0.11312	0.201685	0.325373	0.753283
88	0.247788	0.0619469	0.371681	0.247788	0	8148.67	0.0649096	1.83255	0.0332085	0.0712121	0.321502	0.365584	0.729273
89	0	0.0172414	0.948276	0.0344828	0	8421.73	0.427088	0.408631	0.00132743	0.833808	0.085533	0.311784	1.06002
89	0	0	1	0	0	8206.11	0.0482049	2.98175	0	0.549257	0.0782583	0.217353	1.34916
89	0	0	0.982143	0.0178571	0	8282.95	0.0781824	2.24315	0.000431034	0.580792	0.659766	1.09024	1.37622
89	0	0	1	0	0	8251.75	0.242612	2.74062	0	0.749202	0.367145	0.570975	1.41746
89	0	0	0.931034	0.0689655	0	8265.94	0.0961678	2.50022	0.00172414	0.773133	0.524896	0.860493	1.45798
89	0	0	0.895652	0.104348	0	8360.62	0.312816	1.32983	0.00219298	0.625923	0.658967	0.944628	1.34678
89	0	0	1	0	0	8283.62	0.160442	2.68351	0	0.630085	0.426732	1.02188	1.29883
89	0	0.0598291	0.905983	0.034188	0	8312.6	0.16415	1.6193	0.00233371	0.448672	0.679717	0.93255	1.24917
89	0	0	1	0	0	8280.03	0.402607	2.99833	0	0.563069	0.230483	1.08063	1.13506
89	0	0	1	0	0	8261.49	0.0761139	2.68464	0	0.710641	0.416571	0.895281	1.38415
90	0	0	1	0	0	8424.65	0.461467	0.378744	0	1.12101	0.159057	0.591527	1.21935
91	0	0	0.885965	0.114035	0	8091.16	0.502517	1.61135	0.00265487	0.640726	0.0339235	0.52445	1.63987
91	0	0	1	0	0	8080.5	0.24577	1.29936	0	0.420174	0.150498	0.539623	1.39771
91	0.0176991	0	0.884956	0.0973451	0	8108.57	0.21424	1.92222	0.00438902	0.124841	2.2037	5.87028	0
91	0	0	0.947826	0.0521739	0	8043.3	0.582349	1.94562	0.00110619	0.777125	0.154465	0.707211	1.48918
91	0	0	0.956897	0.0431034	0	8104.32	0.4525	1.23889	0.00109649	0.512786	0.0613894	0.32001	1.73531
91	0	0	0.93913	0.0608696	0	8100.8	0.494364	1.3601	0.00150862	0.56773	0.039266	0.395848	1.72221
91	0	0	0.947368	0.0526316	0	8103	0.471647	1.33446	0.0012931	0.547617	0.0430548	0.397829	1.70583
91	0	0	1	0	0	8010.15	0.559743	2.11906	0	0.608942	0.385116	0.993091	1.10141
91	0	0	0.95614	0.0438596	0	8030.01	0.500194	2.22119	0.000669643	0.563704	0.381955	1.07898	0.9593
91	0	0	0.947368	0.0526316	0	8038.06	0.560219	1.98348	0.00110619	0.7768	0.171787	0.749104	1.39855
91	0.294643	0.0535714	0.410714	0.241071	0	7944.27	0.0633275	2.19256	0.0316038	0.060908	0.586792	1.49337	1.1948
91	0.307018	0.0877193	0.359649	0.245614	0	7944.11	0.0592141	2.19147	0.0350457	0.0562453	0.567377	1.50688	1.19442
91	0.168142	0.292035	0.123894	0.415929	0	7955.72	0.231077	1.73456	0.0630432	0.0860489	0.167464	1.07546	1.85993
91	0.254386	0.298246	0.0789474	0.298246	0	7937.39	0.0994897	1.77952	0.0667225	0.0466699	0.382282	1.09711	1.62969
91	0	0	0.956897	0.0431034	0	8103.86	0.351323	1.44583	0.000663717	0.516531	0.0623828	0.529866	1.47606
91	0	0	0.921739	0.0782609	0	8010.43	0.491147	2.1206	0.00237466	0.507507	0.421121	0.970508	1.85695
91	0	0	0.736842	0.263158	0	8044.13	0.695974	1.94486	0.00644714	0.801332	0.307032	0.683623	1.75439
91	0	0	0.810345	0.189655	0	8052.69	0.682436	1.86308	0.00448889	0.834735	0.256192	0.612333	1.7413
91	0	0	0.810345	0.189655	0	8052.69	0.682436	1.86308	0.00448889	0.834735	0.256192	0.612333	1.7413
91	0	0	1	0	0	8028.26	0.346149	2.39022	0	0.650741	0.242027	1.12939	0.859275
91	0	0	0.701754	0.298246	0	7965.29	0.184606	2.18287	0.00869668	0.19307	0.738587	1.33364	1.25062
91	0	0.00869565	0.6	0.356522	0	7994.43	0.178739	2.15275	0.0142069	0.187743	0.577813	1.32739	1.60031
91	0.0434783	0	0.591304	0.365217	0	7954.83	0.12766	2.18241	0.0113485	0.135113	0.718623	1.39664	1.19871
91	0.513274	0.0619469	0.256637	0.159292	0	7934.51	0.0519647	2.16004	0.0558858	0.0287227	0.641775	1.5422	1.10519
91	0.212389	0.0884956	0.39823	0.292035	0	7953.13	0.0721717	2.17849	0.0280709	0.0751279	0.531687	1.4826	1.29043
92	0	0	0.965217	0.0347826	0	8150.85	0.163132	1.34097	0.000663717	0.242676	2.21821	2.88022	0
92	0	0	1	0	0	8150.31	0.329275	3.96514	0	0.448102	2.72831	3.32535	0
92	0	0	0.91453	0.0854701	0	8132.46	0.09015	1.35428	0.00230403	0.246135	2.11534	2.77225	0
92	0	0	0.853448	0.0948276	0	8230.79	0.197597	1.42381	0.00387931	0.635141	2.6228	3.29487	0
92	0	0	0.982609	0.0173913	0	8241.27	0.238418	1.38486	0.000438596	0.631173	2.74799	3.41647	0
92	0	0	1	0	0	8238.55	0.285858	1.40413	0	0.771884	2.73442	3.40736	0
93	0	0	0.965217	0.0347826	0	8150.85	0.163132	1.34097	0.000663717	0.242676	2.21821	2.88022	0
93	0	0.0176991	0.663717	0.283186	0	8086.37	0.0379853	1.56479	0.0114655	0.33825	2.1109	2.78348	0
93	0.0172414	0	0.62069	0.344828	0	8109.52	0.0641987	1.43115	0.0109692	0.143564	1.98157	2.65265	0
93	0	0	0.913793	0.0862069	0	8161.66	0.119475	1.41004	0.00235401	0.416234	2.15515	2.79982	0
93	0	0.0434783	0.773913	0.182609	0	8084.27	0.0478854	1.56686	0.0061397	0.361581	2.20787	2.88017	0
93	0.0178571	0	0.526786	0.455357	0	8117.81	0.0627133	1.38523	0.0149732	0.0967904	1.98697	2.65332	0
93	0	0	0.965517	0.0344828	0	8120.74	0.0607025	1.77583	0.000862069	0.255203	1.56927	2.22892	0.0283536
93	0	0.0172414	0.801724	0.181034	0	8189.8	0.0766559	1.70026	0.00552483	0.60077	1.40636	2.07145	0.0606091
93	0	0.0608696	0.773913	0.165217	0	8157.01	0.0668581	1.57092	0.00630416	0.500249	1.51518	2.18648	0.0363754
93	0	0	0.982301	0.0176991	0	8290.19	0.29207	1.95423	0.000438596	0.831721	1.3488	1.94279	0.131
93	0	0	0.565217	0.434783	0	8230.45	0.180825	1.63809	0.0170617	0.449147	1.71659	2.36345	0.00232324
93	0	0	1	0	0	8103.76	0.17528	1.99774	0	0.221599	1.86388	2.52186	0
93	0.0701754	0	0.77193	0.157895	0	8120.18	0.0905621	2.28245	0.00479367	0.0871446	1.59604	2.23586	0.0250103
93	0	0	0.964912	0.0350877	0	8202.98	0.188124	1.79238	0.000652174	0.741405	1.2211	1.89217	0.117745
93	0	0	1	0	0	8234.42	0.282511	1.41463	0	0.760841	2.73078	3.40368	0
93	0	0	1	0	0	8232.58	0.259558	1.40868	0	0.786433	2.76734	3.44011	0
93	0	0	1	0	0	8273.73	0.139241	1.20231	0	0.961893	3.70892	4.36724	0
93	0	0	1	0	0	8268.5	0.209578	1.27977	0	0.988378	3.60229	4.26799	0
94	0	0	0.982759	0.0172414	0	8172.51	0.218516	1.35342	0.000438596	0.397813	2.32166	2.97564	0
94	0	0	1	0	0	8170.12	0.159016	1.33977	0	0.384439	2.49801	3.1481	0
94	0	0	0.535714	0.464286	0	8155.29	0.0956581	1.5461	0.0182549	0.347446	1.91869	2.56752	0
94	0	0	0.922414	0.0775862	0	8137.27	0.0927043	1.3897	0.00230403	0.324804	2.11318	2.76429	0
94	0	0	1	0	0	8153.9	0.154836	1.40059	0	0.4	2.38992	3.05001	0
94	0	0	1	0	0	8151.84	0.133413	1.39668	0	0.425558	2.43208	3.09101	0
94	0	0	1	0	0	8305.37	0.468009	1.92776	0	0.606005	1.63718	2.30641	0.0117498
95	0	0	0.689655	0.310345	0	8217.59	0.203083	1.38795	0.0118354	0.453775	2.39779	3.02947	0
95	0.00862069	0.0689655	0.75	0.155172	0	8085.08	0.0659722	1.82248	0.00648444	0.162061	2.04791	2.71266	0
95	0	0	0.938596	0.0614035	0	8199.44	0.207844	1.32317	0.00248135	0.303705	2.5643	3.19411	0
95	0	0	0.95614	0.0438596	0	8185.45	0.184474	1.3102	0.00116686	0.293468	2.55779	3.19761	0
95	0.634783	0.0521739	0.173913	0.13913	0	8253.59	0.0516881	3.46912	0.0535755	0.0155714	2.69263	6.27932	0
95	0	0	1	0	0	8406.74	0.153045	2.2595	0	0.281264	4.99336	8.81264	0
95	0	0	0.570175	0.429825	0	8325.7	0.060753	3.54422	0.0147745	0.64906	3.78141	6.93334	0
95	0.181034	0.224138	0.5	0.0948276	0	8271.93	0.0323111	2.02821	0.0212055	0.0590427	5.08327	8.8244	0
96	0	0	0	0.371681	0	8055.64	0.120073	1.29846	0.210131	2.04485	0.0569164	0.347771	0.334098
96	0	0	0.396552	0.586207	0	8064.69	0.0440516	1.17785	0.0239701	2.26339	1.04758	1.02494	0.266645
96	0	0	0.525862	0.474138	0	8059.65	0.0675672	1.11775	0.0274753	2.43376	0.826584	0.791255	0.266148
96	0	0	0.849558	0.150442	0	8073.63	0.284108	1.40419	0.004198	1.82141	0.603322	0.619063	0.334197
96	0	0	0.0775862	0.448276	0	8057.09	0.0526917	1.25739	0.0714677	2.20723	0.537506	0.514427	0.306822
96	0	0	0.529915	0.470085	0	8059.7	0.0687942	1.11934	0.0262439	2.43437	0.831849	0.796807	0.266057
96	0	0	0.973451	0.0265487	0	8103.04	0.134864	1.26801	0.000646552	2.87163	1.5962	1.54273	0.120273
96	0	0	0.724138	0.275862	0	8107.39	0.32305	1.46377	0.00807872	1.9759	1.84153	1.84017	0
96	0	0.0526316	0.850877	0.0701754	0	8123.29	0.0342858	3.75683	0.00466029	0.154729	5.88762	7.20115	0
96	0.415929	0.20354	0.230088	0.0530973	0.0973451	8104.04	0.064925	3.75043	0.0735589	0.0405903	6.85262	8.21681	0
96	0.0775862	0.198276	0.525862	0.0258621	0.12931	8118.96	0.0719873	3.85645	0.0248281	0.0863064	6.12951	7.45979	0
96	0.442478	0.123894	0.247788	0.0530973	0.115044	8103.43	0.0310901	3.79413	0.0438184	0.0233071	6.20607	7.59249	0
97	0	0	0.568966	0.431034	0	8073.15	0.107156	1.64007	0.0133082	2.91475	1.80361	1.76855	0.013076
97	0	0	0.965217	0.0347826	0	8109.25	0.157899	1.8052	0.000657895	0.705697	0.116595	1.59396	0.320563
97	0	0	0.956897	0.0431034	0	8109.9	0.165353	1.8072	0.00108696	0.710887	0.103478	1.60087	0.31847
97	0	0	0.912281	0.0877193	0	8096.82	0.252397	1.62573	0.00261691	1.32694	0.297184	0.919139	0.334197
97	0	0	0.9375	0.0625	0	8103.91	0.157715	1.6673	0.00159789	1.21468	0.265004	1.03551	0.334197
97	0	0	0.895652	0.104348	0	8099.5	0.348787	1.60465	0.00215517	1.33466	0.518375	0.972656	0.334197
97	0.0956522	0.0173913	0.843478	0	0	8071.4	0.0900368	1.63993	0.00574134	0.101768	0.904622	2.48303	0.104144
97	0.577586	0.0258621	0.284483	0.112069	0	8087.41	0.224575	2.32237	0.0646545	0.0254732	1.64869	3.34536	0.00655808
98	0	0	0.330435	0.582609	0	8074.22	0.173236	1.56632	0.027024	2.83545	1.74522	1.71156	0.0382134
98	0	0	0.758621	0.241379	0	8083.74	0.334921	1.41504	0.00690323	1.76601	0.748555	0.765016	0.334197
98	0	0	0.815789	0.184211	0	8078.69	0.307631	1.40725	0.00514884	1.81806	0.671897	0.682843	0.334147
98	0	0	0.965517	0.0344828	0	8099.43	0.203629	1.70506	0.000862069	1.06478	0.0645796	1.25937	0.334197
98	0	0	0.862069	0.137931	0	8077.66	0.292518	1.40157	0.00369044	1.83963	0.669221	0.677844	0.333977
98	0	0	0.947826	0.0521739	0	8085.73	0.503979	1.85789	0.00181341	1.13479	0.409842	1.53834	0.334197
98	0	0	0.732759	0.241379	0	8074.22	0.367585	1.65541	0.0070506	1.2739	0.18546	1.19296	0.334197
98	0.517544	0.324561	0	0.0175439	0.0526316	8073.08	0.133842	4.02905	0.109673	0.0270339	2.02222	3.35176	0
98	0	0	0.745614	0.236842	0	8075.39	0.370532	1.65881	0.00683508	1.2662	0.183375	1.20139	0.334197
99	0	0	0.330435	0.582609	0	8074.22	0.173236	1.56632	0.027024	2.83545	1.74522	1.71156	0.0382134
99	0	0	0.991228	0	0	8121.11	0.155713	2.39989	0.000219298	0.316817	2.23588	3.96748	0
99	0	0	0.991228	0	0	8121.11	0.155713	2.39989	0.000219298	0.316817	2.23588	3.96748	0
99	0	0	1	0	0	8124.05	0.152624	2.43153	0	0.276487	2.44139	4.20549	0
99	0.232759	0	0.767241	0	0	8103.71	0.067921	2.28632	0.0054536	0.0792224	2.0198	3.71025	0
99	0.116071	0	0.883929	0	0	8104.61	0.0844754	2.54043	0.00262272	0.102347	1.97683	3.72657	0
99	0.0353982	0	0.964602	0	0	8108.42	0.112007	2.5441	0.000431034	0.132716	2.01465	3.76523	0
99	0	0	1	0	0	8119.42	0.238365	2.60713	0	0.283204	2.64982	4.25706	0
99	0	0.175439	0.350877	0.421053	0	8168.12	0.109026	2.49009	0.0314295	0.18021	1.40319	2.12069	0.134379
99	0	0.0431034	0.922414	0.00862069	0	8121.09	0.1858	2.31966	0.00153509	0.34981	2.68878	4.43418	0
100	0	0	1	0	0	8189.44	0.200123	1.14147	0	2.7696	5.24318	5.60983	0
100	0	0.210526	0.736842	0.0350877	0	8107.11	0.169951	3.90871	0.0098483	0.179974	6.50265	7.8719	0
101	0	0	1	0	0	8323.61	0.11573	1.55399	0	0.625656	2.71643	3.46951	0
101	0.39823	0.0442478	0.39823	0.0707965	0	8164.81	0.0901435	2.12593	0.0330195	0.0510244	0.146378	2.07202	0.553057
101	0.362069	0.206897	0.284483	0.146552	0	8192.01	0.0451348	2.01232	0.0499705	0.0556623	0.0767384	2.14638	0.612931
101	0.321739	0.2	0.304348	0.173913	0	8188.87	0.040536	2.02931	0.0464928	0.0601866	0.0676445	2.15773	0.611528
101	0.215517	0.284483	0.12931	0.353448	0.0172414	8262.87	0.121044	1.73876	0.0769484	0.0506479	0.094765	1.53359	1.04491
101	0.210526	0	0.535088	0.254386	0	8251.82	0.0515079	1.78666	0.0214523	0.0655529	0.0517317	1.69196	0.86449
101	0.113043	0	0.608696	0.278261	0	8260.29	0.0820426	1.77214	0.0165351	0.0913795	0.0584984	1.64178	0.925115
101	0.415929	0.283186	0.300885	0	0	8245.96	0.0542765	1.90915	0.0634864	0.03321	0.0579524	0.691598	3.43136
101	0.342105	0.289474	0.324561	0.0438596	0	8252.78	0.0609398	1.93085	0.0562549	0.0501549	0.0611352	0.943	2.66812
102	0	0	0.964602	0.0353982	0	8112.39	0.0607149	1.25105	0.000431034	1.56887	3.57364	3.33005	0
102	0	0	0.922414	0.0603448	0	8276.59	0.283016	0.576515	0.00172414	1.69413	3.00634	2.55386	0
102	0	0	1	0	0	8108.43	0.0706324	1.43725	0	1.33051	3.52486	2.94222	0
102	0	0	0.956897	0.0431034	0	8095.45	0.119294	2.51749	0.00109649	0.866107	3.96252	2.56148	0
102	0	0	0.910714	0.0892857	0	8085.39	0.0579865	2.81243	0.00202893	0.715236	3.81215	2.37214	0
102	0	0	0.973451	0.0265487	0	8083.37	0.0743953	2.88479	0.000646552	0.684139	3.84837	2.40157	0
102	0.0267857	0.0803571	0.669643	0.205357	0.0178571	8080.8	0.105373	3.28847	0.0135366	0.137541	3.31127	1.86269	0
102	0	0	0.973913	0.026087	0	8082.83	0.0709944	2.89593	0.000657895	0.677034	3.83835	2.39134	0
102	0	0	1	0	0	8090.44	0.0567291	2.21566	0	1.00365	4.07267	2.8284	0
102	0	0	1	0	0	8134	0.405041	2.72887	0	0.497921	3.10999	1.79617	0.00499155
102	0.300885	0.0884956	0.283186	0.309735	0.0176991	8089.53	0.0684757	3.29926	0.0425423	0.0570265	2.78982	1.40233	0.112809
102	0	0.00869565	0.608696	0.365217	0	8099.68	0.125249	3.10311	0.0122383	0.169963	2.97579	1.57336	0.10398
103	0	0	0.725664	0.256637	0	8124.35	0.0750121	1.15534	0.00897777	1.82022	3.41154	3.61303	0
103	0	0.181034	0.594828	0.224138	0	8318.61	0.343813	0.928951	0.0167564	1.64203	1.81185	6.71153	0
103	0	0	0.893805	0.106195	0	8256.1	0.263333	1.02747	0.00200893	1.13753	2.78251	6.42495	0
103	0	0	0.974138	0.0258621	0	8279.61	0.315925	1.02888	0.000877193	1.86785	1.98304	6.23338	0
103	0	0	1	0	0	8256.53	0.273904	1.00747	0	1.70762	2.09737	6.31386	0
103	0	0	0.893805	0.106195	0	8290.13	0.270858	1.0283	0.00539195	1.95975	1.94068	6.15399	0
103	0	0	0.495652	0.504348	0	8166.44	0.086154	1.02358	0.014959	0.76835	3.32509	6.3424	0
103	0	0	0.473684	0.526316	0	8168.1	0.0810112	1.02536	0.0160165	0.750552	3.31437	6.37009	0
104	0	0	1	0	0	8337.89	0.183927	1.5528	0	0.834928	2.87641	3.60945	0
104	0	0	0.913043	0.0869565	0	8335.53	0.323303	1.41755	0.00182918	0.780898	3.64467	4.41403	0
104	0	0	1	0	0	8348.44	0.436788	1.45492	0	0.775744	3.51198	4.28307	0
104	0	0	1	0	0	8345.09	0.477894	1.49735	0	0.904475	3.24307	3.99886	0
104	0	0	1	0	0	8332.55	0.380999	1.45304	0	0.942456	3.45066	4.2064	0
104	0	0	1	0	0	8323.54	0.406546	1.4876	0	1.00891	3.27005	4.01373	0
104	0	0	0.982456	0.0175439	0	8352.01	0.5167	1.52675	0.000869565	0.718465	3.17677	3.95074	0
104	0	0	1	0	0	8337.37	0.445195	1.48665	0	0.955784	3.29746	4.04913	0
104	0	0	0.929204	0.0707965	0	8314.49	0.04692	3.5245	0.00175439	0.564373	3.68107	6.71215	0
105	0	0	0.681034	0.318966	0	8213.83	0.153563	1.42568	0.0117199	0.517203	2.33664	2.96637	0
105	0	0	0.649123	0.350877	0	8219.37	0.213472	1.37987	0.012795	0.463052	2.38236	3.01689	0
105	0	0	0.730435	0.269565	0	8208.82	0.1757	1.39608	0.00961122	0.499193	2.27069	2.90879	0
105	0	0	1	0	0	8279.75	0.428978	1.93542	0	0.792812	1.54906	2.1423	0.0533331
105	0	0.026087	0.886957	0.0869565	0	8235.79	0.103125	2.11187	0.00237069	0.540475	0.841596	1.49296	0.322326
105	0	0	0.974138	0.0258621	0	8202.98	0.408977	2.73399	0.000646552	0.444468	0.593375	1.19266	0.322326
105	0.0344828	0.0603448	0.827586	0.0775862	0	8080.56	0.0919791	2.00522	0.0046997	0.138259	2.02674	2.68627	0
105	0.704348	0.00869565	0.191304	0.0956522	0	8135.63	0.0711269	3.66188	0.0902968	0.0146772	1.00232	1.53575	0.273857
105	0.275862	0.12069	0.353448	0.224138	0	8126.04	0.10421	3.3188	0.028223	0.0385422	1.30818	1.87203	0.0846151
106	0	0	0.920354	0.079646	0	8144.6	0.142134	1.34209	0.00199115	0.192684	2.18651	2.85112	0
106	0	0	0.982759	0.0172414	0	8250.17	0.177535	1.87935	0.000438596	0.7998	1.42823	2.04894	0.0864369
106	0.00884956	0.00884956	0.929204	0.0530973	0	8153.7	0.104386	3.23966	0.00237466	0.143013	0.869297	1.42908	0.306813
106	0	0	0.982143	0.0178571	0	8305.75	0.534453	1.84783	0.000646552	0.722882	1.86522	2.52851	0
106	0	0	1	0	0	8146.99	0.154173	1.69439	0	0.361702	1.28337	1.93815	0.0760607
106	0	0.0526316	0.903509	0.0438596	0	8193.88	0.0560739	1.18545	0.00267548	0.516862	3.13239	3.74305	0
106	0	0	1	0	0	8382.41	0.365371	0.982179	0	1.31379	4.23254	4.96142	0
106	0	0	1	0	0	8356.26	0.356156	0.836634	0	1.52432	3.99236	4.68195	0
106	0	0	1	0	0	8406.35	0.519413	1.04317	0	1.17277	4.60442	5.35635	0
106	0.232759	0.172414	0.327586	0.198276	0.0517241	8146.78	0.269599	2.05552	0.0333769	0.0383217	2.85412	4.49015	0
107	0	0	0.72807	0.27193	0	8213.6	0.184988	1.40303	0.0100917	0.450598	2.41756	3.04528	0
107	0	0	1	0	0	8103.76	0.17528	1.99774	0	0.221599	1.86388	2.52186	0
107	0	0	0.982456	0.0175439	0	8209.8	0.288924	1.54393	0.000663717	0.60244	2.6437	3.31473	0
107	0	0.0172414	0.836207	0.146552	0	8160.09	0.180542	1.68773	0.0049627	0.308889	2.34885	3.01767	0
107	0	0	1	0	0	8179.08	0.323332	2.12613	0	0.336285	2.50984	3.16827	0
107	0	0	1	0	0	8204.64	0.182298	1.60238	0	0.625247	2.75204	3.41931	0
107	0.0344828	0.0603448	0.827586	0.0775862	0	8080.56	0.0919791	2.00522	0.0046997	0.138259	2.02674	2.68627	0
107	0.704348	0.00869565	0.191304	0.0956522	0	8135.63	0.0711269	3.66188	0.0902968	0.0146772	1.00232	1.53575	0.273857
108	0	0	0.75	0.25	0	8133.46	0.176452	1.13955	0.00796888	2.02037	3.32972	3.86159	0
108	0	0	0.964602	0.0353982	0	8174.26	0.346637	1.11114	0.000862069	2.08645	2.87704	3.67328	0
108	0	0	0.991379	0.00862069	0	8159.29	0.317741	1.11599	0	2.15711	2.92336	3.78627	0
108	0	0.0173913	0.930435	0.0521739	0	8178.11	0.0983058	0.905411	0.00176991	2.60491	2.57175	4.21841	0
108	0	0	0.947368	0.0526316	0	8330.61	0.336628	0.567507	0.00118733	2.68836	1.98557	3.50159	0
108	0	0.0442478	0.734513	0.221239	0	8341.93	0.354756	0.57403	0.0145683	2.90659	1.74988	3.81104	0.00217494
108	0.344828	0.0862069	0.310345	0.206897	0.0517241	8093.94	0.0512676	3.44091	0.0416237	0.054377	2.70541	1.345	0.115752
108	0	0	0.973684	0.0263158	0	8112.17	0.336015	2.95943	0.000652174	0.34823	2.87305	1.58667	0.158516
108	0.853448	0.0258621	0.0344828	0	0.00862069	8065.81	0.0216919	3.37994	0.144302	0.00396858	2.92805	1.48188	0.112809
108	0.866071	0.0267857	0.0178571	0	0.00892857	8065.64	0.0222692	3.39561	0.147282	0.00344067	2.91102	1.46515	0.112809
109	0	0	1	0	0	8104.42	0.0537471	1.69278	0	1.21212	3.63496	2.82277	0
109	0	0	1	0	0	8359.82	0.709863	0.467415	0	2.41957	2.69715	2.58676	0
109	0	0.0258621	0.922414	0.00862069	0	8196.04	0.216095	1.65221	0.00133929	1.70736	2.73198	3.50522	0
109	0	0.0869565	0.843478	0.0695652	0	8387.99	0.839434	0.366155	0.00479367	2.06743	3.1352	2.14812	0
109	0	0	1	0	0	8355.18	0.418045	0.509833	0	2.61483	2.37051	2.8989	0
109	0.947368	0.0175439	0	0	0	8064.6	0.0266946	3.81963	0.258954	0.00131579	2.68135	1.24278	0.112809
109	0	0	0.929204	0.0707965	0	8240.42	0.267417	0.989752	0.00181341	2.01038	1.51155	3.83339	0.022125
109	0.707965	0.123894	0.00884956	0.0707965	0.0265487	8069.24	0.0467173	3.57128	0.130605	0.00869627	2.74223	1.32023	0.112809
110	0	0	0.626087	0.373913	0	8195.59	0.0627517	0.686357	0.0123481	3.04721	5.39572	3.50675	0
110	0	0.00877193	0.912281	0.0614035	0	8283.84	0.319286	0.515871	0.00217391	2.77359	4.16677	2.21048	0
110	0	0.0172414	0.793103	0.172414	0	8308.62	0.398433	0.514134	0.00589753	2.69312	4.07695	2.11937	0
110	0	0.0884956	0.654867	0.256637	0	8355.21	0.469344	0.502008	0.0135803	2.57554	3.95659	2.01002	0
110	0	0	0.99115	0	0	8275.16	0.310242	0.53591	0.000217391	2.81268	4.20144	2.23011	0
110	0	0.0701754	0.614035	0.298246	0	8332.38	0.412091	0.496505	0.01359	2.62939	4.01839	2.07779	0
110	0	0.0517241	0.646552	0.275862	0	8322.52	0.389777	0.495101	0.0121394	2.65037	4.04566	2.1059	0
111	0	0	1	0	0	8220.04	0.306165	0.749221	0	3.47591	5.10051	3.3785	0
111	0	0.0517241	0.465517	0.37069	0	8290.84	0.686335	1.19838	0.0247992	2.02629	2.42482	3.22882	0
111	0	0	1	0	0	8242.18	0.65656	0.996714	0	2.21725	2.51764	3.05	0
111	0	0.0173913	0.973913	0.00869565	0	8232.48	0.465141	1.00364	0.000657895	2.25741	2.69544	2.96284	0
111	0	0.0176991	0.725664	0.221239	0	8277.75	0.56399	1.59442	0.0117436	1.83544	2.43417	3.39148	0
111	0	0.0175439	0.780702	0.184211	0	8270.93	0.532271	1.61589	0.00789208	1.82991	2.46332	3.38411	0
111	0	0.0178571	0.410714	0	0.0267857	8144.12	0.0256876	2.84201	0.0328237	0.512829	1.78284	5.04151	0.000353042
111	0	0.0353982	0.168142	0.0353982	0	8142.75	0.050777	2.58503	0.0544225	1.03385	1.2458	5.06335	0.0603241
111	0	0.0862069	0	0	0	8130.3	0.0660039	2.86691	0.240938	1.05669	1.29247	5.40509	0.0650921
111	0	0.0530973	0.0530973	0	0	8138.69	0.0621287	2.84493	0.12529	1.14554	1.11155	5.38904	0.0935239
112	0	0	1	0	0	8435.94	0.150773	1.29361	0	0.493491	3.06939	6.91727	0
112	0	0	1	0	0	8505.17	0.375735	3.17792	0	0.391743	1.61492	10.9604	0.0332426
112	0	0	0.973684	0.0263158	0	8521.01	0.252528	3.02289	0.000862069	0.787425	2.02837	11.5133	0
112	0	0	0.991228	0.00877193	0	8498.36	0.152583	3.14978	0.000652174	0.18609	1.38848	10.8214	0.0779776
112	0	0.0442478	0.823009	0.132743	0	8490.36	0.0852609	2.85469	0.00572852	0.166448	1.71278	10.4962	0.013517
112	0	0	1	0	0	8529.14	0.273909	3.16038	0	0.680615	1.8937	11.5544	0
112	0	0	1	0	0	8488.72	0.17484	2.87088	0	0.250386	1.73069	10.6183	0.0104925
112	0	0	0.991228	0.00877193	0	8449.53	0.53433	3.02355	0.000215517	0.692806	2.04101	11.242	0
113	0	0	1	0	0	8435.94	0.150773	1.29361	0	0.493491	3.06939	6.91727	0
113	0	0	0.965517	0.0344828	0	8428.37	0.18811	1.147	0.000652174	0.232715	3.32126	7.37455	0
113	0	0	1	0	0	8436.67	0.279921	1.22108	0	1.11013	4.14155	7.2713	0
113	0	0	1	0	0	8436.89	0.0558704	1.25822	0	1.15755	3.88233	7.24253	0
114	0	0	1	0	0	8467.19	0.246206	1.17131	0	0.694929	3.22154	6.89299	0
114	0	0	1	0	0	8472.39	0.264505	1.12585	0	1.32508	2.97042	6.21934	0
114	0	0	1	0	0	8421.16	0.448397	0.92582	0	0.460447	4.44495	7.57376	0
115	0	0	1	0	0	8389.25	0.436678	1.73361	0	0.727077	1.15731	2.16781	0.161209
115	0	0	1	0	0	8527.97	0.551373	1.10371	0	1.31305	0.0576214	1.32253	1.57145
115	0	0	0.725664	0.274336	0	8357.09	0.0608394	1.50936	0.00937587	0.938447	0.563418	1.52061	0.917037
115	0	0	1	0	0	8407.58	0.374264	1.62039	0	1.14977	0.607148	2.00931	0.236753
115	0	0	1	0	0	8396	0.493882	1.71043	0	0.877879	0.889806	2.19296	0.160846
115	0	0	1	0	0	8396	0.493882	1.71043	0	0.877879	0.889806	2.19296	0.160846
115	0	0	1	0	0	8386.48	0.255226	1.63514	0	0.282382	1.33486	2.57024	0.0551353
115	0	0	1	0	0	8395.82	0.496022	1.70582	0	0.875896	0.890712	2.18814	0.161378
115	0	0	1	0	0	8382.53	0.4427	1.75578	0	0.786435	1.29157	2.07421	0.203559
115	0	0	0.982609	0.0173913	0	8381.04	0.115077	2.00061	0.000646552	0.16872	1.81872	3.0487	8.26871e-06
115	0.333333	0.00877193	0.350877	0.307018	0	8358.43	0.0460486	1.96022	0.0379039	0.0423351	1.80153	2.95493	7.38857e-05
115	0.442478	0.079646	0.309735	0.159292	0.00884956	8349.57	0.0749803	1.91775	0.0394696	0.032382	1.77924	2.85762	0.000437899
116	0	0	1	0	0	8192.1	0.182753	1.13122	0	2.78239	5.27302	5.64775	0
116	0	0	0.396552	0.586207	0	8064.69	0.0440516	1.17785	0.0239701	2.26339	1.04758	1.02494	0.266645
116	0	0	1	0	0	8242.23	0.257152	1.22357	0	2.57508	6.18849	6.16995	0
116	0	0	1	0	0	8257.64	0.237817	1.11719	0	1.92851	6.11948	6.81955	0
116	0	0	1	0	0	8240.67	0.0726095	1.12905	0	2.2068	6.2226	6.53561	0
116	0	0	1	0	0	8257.77	0.23808	1.11709	0	1.92755	6.11087	6.82351	0
116	0	0	0.929825	0.0701754	0	8172.91	0.340644	3.51877	0.00230403	0.283753	9.52006	10.4218	0
117	0	0	1	0	0	8187.35	0.221533	1.15424	0	2.77028	5.23121	5.58797	0
117	0	0.0964912	0.622807	0.184211	0	8095.53	0.0491896	1.54903	0.0116398	3.39404	4.40208	4.38425	0

## Sheet: Summer season
bird	irrigated agriculture	grassland	sagebrush	sagebrush/grassland	riparian	elevation	distance to water	water density	distance to sagebrush	distance to agriculture	distance to oil/gas roads	distance to well pads	energy development index
1	0	0.28125	0.4375	0.0625	0	8287.12	0.0694322	3.11697	0.0198423	0.369481	13.6804	15.0751	0
1	0	0	1	0	0	8284.77	0.137288	3.13599	0	0.457117	13.3142	14.7688	0
1	0	0	0.828571	0.171429	0	8297.77	0.117337	3.1672	0.00529587	0.46614	13.3785	14.8653	0
1	0	0	0.971429	0.0285714	0	8276.06	0.0904368	3.10773	0	0.538978	13.2624	14.7826	0
1	0	0	0.914286	0.0857143	0	8289.09	0.152822	2.86349	0.00347222	0.491033	12.9671	14.6959	0
1	0	0.0625	0.625	0.3125	0	8250.72	0.100591	2.94794	0.0113474	0.40544	13.1668	14.3465	0
1	0	0	0.916667	0	0	8303.41	0.170575	2.86607	0.00234375	0.714996	12.9168	14.3889	0
1	0	0	1	0	0	8295.94	0.167326	2.8491	0	0.898836	12.6999	14.2534	0
1	0	0.189189	0.297297	0	0	8255.51	0.199611	2.5926	0.0408602	0.761741	12.6692	13.5122	0
1	0	0	0.735294	0.176471	0	8281.89	0.261792	2.41479	0.00555556	1.09537	12.3395	13.3708	0
1	0	0	0.6875	0.28125	0	8278.03	0.295544	2.44739	0.00792654	1.04433	12.3926	13.4098	0
2	0	0	1	0	0	8108	0.371162	2.49915	0	0.479871	4.06617	5.27576	0
2	0	0	0.794118	0.205882	0	8122.37	0.561731	1.79767	0.0058432	0.527305	3.87064	4.92953	0
2	0	0	1	0	0	8133.49	0.606437	1.14021	0	0.578675	3.55575	4.54719	0
2	0	0	1	0	0	8137.27	0.65642	1.22035	0	0.632878	3.67295	4.65806	0
2	0	0	1	0	0	8116.26	0.447087	2.48565	0	0.619263	4.16507	5.32123	0
2	0	0	1	0	0	8112.72	0.481915	2.44422	0	0.527354	4.07232	5.23311	0
2	0	0	1	0	0	8143	0.719278	1.65034	0	0.697642	3.95846	4.96381	0
2	0.0810811	0.027027	0.648649	0.027027	0.0540541	8084.83	0.0518972	2.31576	0.0120143	0.0686736	3.69197	5.0052	0
2	0.0588235	0.323529	0.235294	0	0.323529	8104	0.0705672	3.5376	0.0457742	0.0547459	5.01043	6.51647	0
2	0	0	0.914286	0.0857143	0	8146.24	0.0841237	3.4508	0.00214286	0.285771	6.42597	7.57649	0
2	0	0	0.0277778	0.972222	0	8152.85	0.0344938	2.87881	0.0574949	0.68517	6.07232	7.15397	0
2	0	0	0.0277778	0.972222	0	8152.85	0.0344938	2.87881	0.0574949	0.68517	6.07232	7.15397	0
2	0	0	0.555556	0.444444	0	8148.03	0.102503	3.27347	0.0122477	0.410949	6.44175	7.56666	0
2	0	0	0.555556	0.444444	0	8148.03	0.102503	3.27347	0.0122477	0.410949	6.44175	7.56666	0
2	0.228571	0.342857	0	0.171429	0.0571429	8100.86	0.015667	3.62567	0.0928279	0.03684	5.56181	7.02984	0
3	0.342857	0.371429	0	0	0.228571	8134.74	0.0234949	2.66784	0.11048	0.0256772	1.3328	4.42041	0.0455955
3	0.027027	0.405405	0.459459	0.108108	0	8138.23	0.0249667	2.65113	0.0247413	0.0860407	1.4394	4.33005	0.0337066
3	0.794118	0	0	0	0.205882	8123.38	0.0299305	2.78831	0.167802	0.00514706	1.04693	4.32137	0.0857065
3	0	0.0857143	0.628571	0.285714	0	8138.83	0.0362726	2.75118	0.0134489	0.31957	1.62848	3.37122	0.0228541
3	0	0	1	0	0	8168.39	0.206845	2.54579	0	0.591371	1.83787	3.11859	0
3	0	0	0.617647	0.382353	0	8133.6	0.0323935	2.7769	0.0102975	0.244844	1.5613	3.45449	0.0378631
3	0	0.166667	0.694444	0.138889	0	8141.77	0.0343094	2.6767	0.0107043	0.388379	1.73958	3.26263	0.000299709
3	0	0.142857	0.657143	0.2	0	8125.71	0.0311351	2.8729	0.00808824	0.292511	1.4245	3.56838	0.0568567
3	0	0.111111	0.638889	0.25	0	8138.82	0.0353494	2.7437	0.0127346	0.327056	1.64214	3.35766	0.0187906
3	0	0	0.823529	0.176471	0	8117.5	0.0783656	3.25535	0.00324575	0.142939	1.06142	3.89061	0.0925943
3	0	0.142857	0.657143	0.2	0	8136.97	0.0329107	2.62352	0.00838798	0.378145	1.78165	3.24128	0
3	0.764706	0.0294118	0	0.0588235	0.147059	8123.29	0.0228267	2.75986	0.104015	0.00588235	1.08508	4.24854	0.0826422
3	0	0	0.675676	0.297297	0	8168.17	0.123721	2.86594	0.00902778	0.151837	1.4472	5.14739	0.0274402
3	0.5	0.194444	0	0	0.305556	8139.81	0.0187818	2.90442	0.14599	0.0146327	1.23352	4.91646	0.055863
4	0	0	0.0285714	0	0	8104.63	0.186414	3.72471	0.0553827	1.86851	3.30937	7.38213	0
4	0	0	1	0	0	8104.08	0.22334	2.97849	0	1.80129	4.054	8.03851	0
4	0	0	0.96875	0.03125	0	8105.09	0.127171	3.26116	0.00151515	2.00078	3.66059	7.5032	0
4	0	0.171429	0	0.0285714	0	8106.69	0.194441	3.3958	0.0975578	1.00252	2.64257	6.4819	0
5	0	0	1	0	0	8105.89	0.48746	1.28777	0	0.726645	0.3375	0.877212	1.1198
5	0	0	1	0	0	8027.78	0.137912	1.27283	0	0.583026	0.713163	0.730964	1.21041
5	0	0	1	0	0	8048.69	0.0288302	1.30558	0	0.985056	1.63576	2.34073	0.0913331
5	0	0	1	0	0	8067.6	0.166861	0.969141	0	1.22447	1.48404	2.10332	0.326412
5	0	0	1	0	0	8147.62	0.443961	0.610489	0	1.8232	1.00329	1.5351	1.75734
5	0	0	0.944444	0.0555556	0	8053.09	0.0306378	1.16124	0.00135135	1.08597	1.51176	2.24964	0.277537
5	0	0	1	0	0	8083.53	0.297381	0.792809	0	1.41245	1.37399	1.90699	0.421483
5	0	0	1	0	0	8078.19	0.228596	0.829162	0	1.36799	1.36969	1.96298	0.422202
5	0	0	1	0	0	8105.97	0.358404	1.70211	0	0.393056	0.280147	0.735438	0.94416
5	0	0	1	0	0	8112.53	0.415393	1.74209	0	0.422484	0.0830339	0.285516	0.691211
5	0	0	1	0	0	8118.71	0.567864	1.52123	0	0.571409	0.175619	0.265342	0.612494
6	0	0	1	0	0	8204.29	0.286584	1.47284	0	1.02378	1.92564	1.90442	0
6	0	0	1	0	0	8157.84	0.207351	1.40212	0	1.18703	2.15207	2.16941	0
6	0	0	0.8125	0.1875	0	8119.5	0.0280834	1.81431	0.00405405	1.26885	2.43702	2.52864	0
6	0	0	0.742857	0.257143	0	8151.86	0.0287557	1.49831	0.00642857	0.669144	1.64702	1.51278	0.342623
6	0	0	1	0	0	8166.03	0.0303576	1.46191	0.000714286	0.465703	1.43993	1.29089	0.735084
6	0	0	1	0	0	8167.14	0.0877513	1.51009	0	0.670607	1.63557	1.47495	0.353311
6	0	0	1	0	0	8169.59	0.0314093	1.45837	0	0.467871	1.4394	1.28331	0.740004
6	0	0	1	0	0	8211.16	0.278183	1.42985	0	1.07157	2.024	1.95212	0
6	0	0.0555556	0.75	0.194444	0	8143.57	0.0319325	1.54391	0.00546875	0.898742	1.85562	1.71232	0.0386774
6	0	0	0.9375	0.0625	0	8140.24	0.029502	1.53877	0.00214286	1.01238	1.96571	1.87486	0
6	0	0	1	0	0	8179.86	0.11391	1.48499	0	0.958163	1.92338	1.80735	0
6	0	0	0.971429	0.0285714	0	8170.66	0.0491611	1.43925	0.00147059	0.38333	1.36162	1.22449	0.818668
6	0	0	0.818182	0.181818	0	8187.06	0.0657386	1.39966	0.00579235	0.165113	1.12829	1.05174	1.08682
6	0	0	0.828571	0.0857143	0	8266.81	0.0844569	1.48932	0.00234375	1.13775	1.08738	1.44848	0.85812
6	0	0.0857143	0.228571	0.514286	0	8316.12	0.171272	1.51183	0.0378708	1.02359	1.04383	1.36405	1.02493
6	0	0.09375	0.125	0.5625	0	8311.66	0.160207	1.50805	0.0437749	1.02744	1.06142	1.37919	1.00635
7	0	0.228571	0.485714	0.285714	0	8563.59	0.0308459	1.42909	0.0183926	0.309899	0.312499	6.89368	0.0883277
7	0.542857	0.171429	0.0857143	0.171429	0.0285714	8354.63	0.0160102	3.35512	0.070496	0.0161788	0.112496	5.79414	0.21642
7	0.411765	0.147059	0.147059	0.117647	0.0294118	8372.8	0.0286636	3.23046	0.0540968	0.026385	0.158091	5.9186	0.195172
7	0.857143	0.0857143	0	0	0.0571429	8336.18	0.0292856	3.39945	0.13253	0.00357143	0.327644	5.74696	0.175239
7	0.75	0.09375	0.03125	0.03125	0.09375	8347.03	0.0155917	3.37096	0.0605981	0.00735485	0.265765	5.8651	0.18267
7	0	0.323529	0.470588	0.117647	0.0882353	8371.06	0.0297924	3.60571	0.017822	0.0710552	0.35644	5.94701	0.176571
7	0.46875	0.125	0.15625	0.0625	0.1875	8374.03	0.0283406	3.15201	0.0567163	0.0218293	0.0425928	5.90211	0.216044
7	0	0	0.6	0.4	0	8306.56	0.0532769	3.98472	0.00906366	0.101623	1.98145	5.17265	0
7	0.0285714	0.142857	0.6	0.228571	0	8303.62	0.0445958	3.87767	0.0112337	0.0788814	1.96147	5.77526	0
7	0.323529	0.176471	0.117647	0.176471	0.205882	8373.77	0.0296038	3.15125	0.0599874	0.0283221	0.0314093	5.91328	0.220187
7	0.666667	0.0833333	0.138889	0	0.0277778	8355	0.0190824	3.28254	0.0588907	0.0102975	0.210159	5.88855	0.189004
7	0.242424	0.424242	0	0.0606061	0.212121	8349.22	0.0229953	3.43472	0.101525	0.0289833	0.415803	5.5908	0.169952
7	0.171429	0	0.628571	0.2	0	8348.17	0.0180305	3.37186	0.0114286	0.0574378	0.250006	5.71357	0.191955
8	0.628571	0.0571429	0.114286	0.114286	0	8252.19	0.0295822	4.07901	0.0595787	0.0102959	0.93672	4.0715	0.0747783
9	0.147059	0.0882353	0.529412	0.117647	0	8204.91	0.0395439	1.91343	0.016183	0.0501883	2.9128	4.86653	0
9	0	0	1	0	0	8357.8	0.22683	1.29479	0	0.647125	2.88619	4.63162	0
9	0.0540541	0.324324	0.405405	0.216216	0	8064.86	0.138438	1.3076	0.0298415	0.0608607	0.555904	4.71003	0.316012
9	0.142857	0.0285714	0.285714	0.2	0.114286	8066.12	0.0499194	1.63013	0.033237	0.0397226	1.83922	4.81932	0
9	0.0588235	0.0588235	0.558824	0.205882	0	8095.46	0.0448274	1.37249	0.0148007	0.0670431	2.3185	4.83057	0
9	0	0.0588235	0.588235	0.352941	0	8085.03	0.0882034	1.31695	0.0156668	0.111462	2.10204	4.70316	0
10	0.125	0	0.78125	0.09375	0	8065.49	0.196357	1.62189	0.00735294	0.0627888	0.185714	4.59299	0.325913
10	0	0	1	0	0	8082.17	0.301295	1.8828	0	0.146061	0.0875	4.51075	0.319152
10	0.470588	0.117647	0.117647	0.264706	0.0294118	8065.88	0.0382019	0.970296	0.0366476	0.0217113	0.520714	5.08261	0.37417
10	0.542857	0.142857	0.0857143	0.142857	0.0857143	8065.51	0.0262248	0.962063	0.0456076	0.0133263	0.544286	5.05676	0.368896
11	0.638889	0.166667	0.0555556	0	0	7935.34	0.0916844	3.05282	0.076449	0.0128727	4.05664	4.11593	0
11	0.805556	0.0555556	0.0555556	0	0	7934.14	0.0870991	3.00552	0.074234	0.00543641	4.04493	4.10222	0
11	0.914286	0.0285714	0	0	0.0571429	7959.25	0.0372578	2.60772	0.0987082	0.00214286	4.59637	4.65423	0
11	0.625	0.0625	0.21875	0.09375	0	7964.79	0.0327155	2.45706	0.0401182	0.0135161	4.44146	4.47354	0
11	0.861111	0	0	0	0	7937.58	0.0731731	3.04587	0.132879	0.00375987	4.11901	4.17844	0
11	0.885714	0.0571429	0	0	0.0285714	7938.37	0.0563904	3.05192	0.157045	0.00285714	4.15226	4.21237	0
11	0	0	0.857143	0.142857	0	7978.83	0.0303814	2.93239	0.00390625	0.305749	3.45025	3.4881	0
11	0	0	1	0	0	8011.78	0.0953063	3.137	0	0.368396	3.54686	3.62578	0
11	0	0	0.513514	0.486486	0	8055.71	0.0911769	2.33291	0.0133263	1.02704	2.83008	2.90334	0
11	0	0	1	0	0	8102.34	0.277716	2.65962	0	0.367503	3.66501	3.82836	0
11	0	0	1	0	0	8049	0.0625	3.02146	0	0.144927	4.69508	4.90111	0
11	0	0	1	0	0	8111.53	0.210176	1.79472	0	0.412439	3.69983	3.91648	0
11	0.257143	0.0571429	0.514286	0.171429	0	7948.27	0.0566351	2.85013	0.0161834	0.0426404	3.78033	3.82223	0
13	0	0.0294118	0.823529	0.147059	0	8515.86	0.199449	1.53291	0.00367647	0.767205	1.81814	6.16396	0
13	0	0	1	0	0	8435.28	0.154512	1.78584	0	0.254326	2.14374	5.77143	0
13	0	0	0.65625	0.34375	0	8408.37	0.301521	1.51593	0.0134708	0.635906	1.67722	5.9241	0.00211986
13	0	0.176471	0.147059	0.676471	0	8493.79	0.143662	1.50264	0.0407611	0.9	1.8071	6.27878	0
14	0	0	1	0	0	8006.91	0.113308	2.93686	0	0.258602	1.96579	2.27773	0
14	0	0	0.914286	0.0857143	0	8002.31	0.0824732	3.00522	0.00220588	0.196953	1.91491	2.34107	0
14	1	0	0	0	0	7994.54	0.0364212	3.51635	0.171449	0	1.84457	2.87532	0
14	0.142857	0.0571429	0.742857	0.0285714	0.0285714	8010.91	0.056896	3.08142	0.0108035	0.0589559	1.98502	2.38394	0
14	0	0	1	0	0	8101.47	0.388882	1.11967	0	0.320035	0.175	5.10444	0.391359
14	0.6	0.0571429	0	0	0.342857	7987.88	0.0150349	3.35822	0.170864	0.0102959	1.41647	2.85565	0.0344474
14	0.714286	0.114286	0	0.0571429	0.114286	7992.55	0.0390574	3.21895	0.0925181	0.01	1.89519	2.51791	0
14	0.527778	0	0.138889	0.222222	0.111111	8000	0.0298423	3.25901	0.0497481	0.017327	1.92916	2.56958	0
14	0.941176	0	0	0	0.0588235	7994.05	0.0336175	3.50727	0.301188	0.00147059	1.688	2.95019	0.00191409
14	0.444444	0.166667	0	0.361111	0	7998.17	0.0744513	3.52229	0.232075	0.0174059	1.5865	3.1899	0.011399
14	0	0	1	0	0	8020.26	0.0543343	2.31984	0	0.893271	1.44794	1.81504	0.212067
14	1	0	0	0	0	7995.97	0.0335871	3.50195	0.144297	0	2.04943	3.0213	0
14	1	0	0	0	0	7991.23	0.0206865	3.36463	0.16247	0	1.77887	2.73644	0
14	0.857143	0	0	0.0571429	0.0857143	7993.6	0.0145797	3.40646	0.106521	0.00357143	1.84415	2.73834	0
15	0	0	1	0	0	8405.43	0.441457	2.17924	0	0.583666	1.99775	3.53157	0
15	0	0	1	0	0	8416.97	0.275132	2.46037	0	0.279548	2.47411	4.41154	0
15	0	0	1	0	0	8399.71	0.19027	2.48366	0	0.205126	2.02255	3.85196	0
15	0	0	1	0	0	8403.29	0.19714	2.63217	0	0.194924	2.42721	4.45517	0
15	0	0	1	0	0	8423	0.313677	2.33004	0	0.313812	2.51003	4.45595	0
15	0	0	1	0	0	8407.58	0.189416	2.47392	0	0.185347	2.00297	4.06379	0
15	0	0	1	0	0	8415.44	0.257803	2.47904	0	0.258517	2.50787	4.46255	0
15	0	0	1	0	0	8396.91	0.269139	2.32931	0	0.410855	2.13319	3.55435	0
15	0.264706	0.0882353	0.323529	0.235294	0.0882353	8370.31	0.0246935	2.66026	0.0362953	0.0300515	1.78798	3.92659	0
15	0.0857143	0	0.257143	0.657143	0	8356.89	0.0324048	2.05896	0.0411884	0.0427483	1.85938	3.02379	0
15	0.735294	0.0294118	0.205882	0.0294118	0	8353.2	0.0257193	1.81931	0.0323509	0.00887095	1.73131	2.84911	0.000486799
15	0.588235	0.117647	0.205882	0.0882353	0	8336.7	0.0791667	2.49733	0.0437011	0.0126784	1.64346	3.20641	0.00404639
15	0.235294	0.205882	0.441176	0.0588235	0	8374.28	0.045	2.93482	0.0249582	0.05	2.56057	4.75138	0
15	0	0	1	0	0	8381.53	0.0892405	2.02133	0	0.136416	1.83612	3.04388	0
15	0.514286	0.0857143	0.114286	0.285714	0	8369.41	0.0302588	2.88325	0.0536027	0.020208	2.26885	4.55438	0
15	0.40625	0.15625	0.40625	0.03125	0	8369.81	0.0353017	2.92653	0.0304227	0.0298801	2.4009	4.63573	0
16	0	0.25	0	0	0	8117.2	0.190957	3.43475	0.36443	0.979477	2.13112	6.36977	0
16	0	0.264706	0	0	0	8113.91	0.21423	3.60243	0.332803	1.12851	2.35374	6.51365	0
16	0	0.171429	0	0	0	8115.71	0.123856	3.63802	0.288641	1.081	2.3565	6.59507	0
16	0	0	0.0285714	0	0	8104.63	0.186414	3.72471	0.0553827	1.86851	3.30937	7.38213	0
16	0	0	1	0	0	8104.08	0.22334	2.97849	0	1.80129	4.054	8.03851	0
16	0	0	0.96875	0.03125	0	8105.09	0.127171	3.26116	0.00151515	2.00078	3.66059	7.5032	0
16	0	0	0.0540541	0	0	8104.42	0.142535	3.67213	0.0479178	1.9229	3.36851	7.4435	0
16	0	0	1	0	0	8104	0.160869	3.0801	0	1.94342	3.86073	7.91451	0
18	0	0	1	0	0	8110.49	0.284696	0.957395	0	0.118114	0.354167	5.32936	0.414838
18	1	0	0	0	0	8092.38	0.237496	0.788797	0.17635	0	0.567647	5.58344	0.424845
18	0	0.40625	0.375	0.21875	0	8239.42	0.0783502	1.88413	0.0205917	0.540367	3.1388	5.54211	0
18	0.714286	0	0.285714	0	0	8180.97	0.743169	0.877127	0.0450367	0.0097502	0.146041	5.95067	0.288653
18	1	0	0	0	0	8089.22	0.234529	0.800155	0.146213	0	0.544286	5.53038	0.424845
18	1	0	0	0	0	8111.78	0.25958	0.742607	0.188949	0	0.593245	5.87751	0.424597
18	0.8125	0	0	0	0.1875	8102.97	0.0393531	0.776563	0.105109	0.0046875	0.820978	5.77348	0.424845
19	0	0	1	0	0	8150.37	0.0944836	3.63637	0.00142857	0.106806	0.605325	0.748587	0.294481
19	0.216216	0.0540541	0.621622	0.108108	0	8147.06	0.0380168	3.83545	0.0130256	0.0494952	0.640161	0.759701	0.30051
19	0.558824	0.441176	0	0	0	8162.82	0.0148774	5.09718	0.173251	0.0171328	0.121943	1.13216	0.366373
19	0	0.235294	0.294118	0.205882	0	8183	0.0117244	3.00157	0.0371184	0.214087	1.64137	1.98183	0.0601482
19	0	0	1	0	0	8203.34	0.162992	3.48416	0	0.576902	0.947354	1.16279	0.347021
19	0.162162	0.0810811	0.459459	0.297297	0	8165.97	0.0565136	4.561	0.0200314	0.0476408	0.192847	0.939092	0.366373
19	0	0	1	0	0	8196.67	0.0351826	4.82267	0	0.100593	1.20204	2.01049	0.178047
20	0	0	1	0	0	8134.63	0.847475	1.92566	0	1.08786	1.32939	1.89806	0.0733523
20	0.75	0.138889	0.0833333	0.0277778	0	8001.94	0.0096986	3.52065	0.0788814	0.00833333	2.02438	2.87065	0
20	0	0	0.971429	0.0285714	0	8161.31	0.494298	2.35453	0.00078125	0.842763	1.49267	1.83897	0.0369655
20	0.0571429	0.114286	0.6	0.142857	0.0857143	8010.82	0.0561264	3.17939	0.0175676	0.0763423	1.98888	2.45293	0
20	0	0	1	0	0	8221.49	0.817361	0.786535	0	1.69867	0.664247	1.39336	0.439569
20	0	0	0.971429	0.0285714	0	8144.31	0.81387	1.75047	0.000714286	1.15459	1.23065	1.78098	0.104179
20	0	0	1	0	0	8264.69	0.61268	0.821391	0	1.44126	0.3051	1.36568	0.791252
20	0	0	0.657143	0.342857	0	8020.12	0.174716	3.34422	0.00833333	0.162322	2.09211	2.52865	0
20	0	0	1	0	0	8127.83	0.442209	1.14919	0	1.63041	0.0448274	0.443713	1.84436
21	1	0	0	0	0	8114.77	0.296299	3.01758	0.0128236	0	2.82943	3.87179	0
21	1	0	0	0	0	8115.51	0.26619	3.03342	0.0117244	0	2.80426	3.84159	0
21	0.885714	0.0285714	0.0571429	0.0285714	0	8111.4	0.349753	2.95239	0.0351815	0.00315301	2.91429	3.94295	0
21	0.285714	0	0.571429	0.142857	0	8051.88	0.0390235	2.93387	0.0139337	0.0295512	5.0346	5.57892	0
21	0.21875	0	0.625	0.15625	0	8052.03	0.0395057	2.94434	0.0147518	0.0323216	5.03612	5.58192	0
21	0.264706	0	0.588235	0.147059	0	8052.37	0.0405771	2.94895	0.0130305	0.0304203	5.03332	5.5795	0
21	0	0.0833333	0.75	0.166667	0	8120.34	0.0158876	3.09473	0.00357143	0.237211	3.05346	3.69179	0
21	0.324324	0	0.675676	0	0	8129.34	0.0310797	2.63425	0.0117705	0.0381249	2.26702	3.50804	0
21	0.5	0	0.46875	0	0	8121.65	0.164248	2.90384	0.00214286	0.0158146	2.63971	3.75024	0
21	0.558824	0.0294118	0.382353	0.0294118	0	8108.14	0.406424	2.86094	0.0267064	0.0187392	2.9947	4.01595	0
21	0.151515	0	0.787879	0.030303	0	8105.94	0.413771	2.84967	0.0038673	0.0523451	3.12305	4.09718	0
21	0.555556	0.0277778	0.416667	0	0	8122.57	0.112314	2.87858	0.00653765	0.0140574	2.59628	3.68722	0
21	0	0.15625	0.59375	0.125	0	8103.62	0.37773	2.85659	0.0128046	0.0741672	3.1631	4.10113	0
23	1	0	0	0	0	8230.09	0.410815	1.34024	0.00718893	0	1.93181	3.37854	0
23	0.363636	0.0606061	0.393939	0.0909091	0.0909091	8205.16	0.222031	1.76315	0.0248944	0.030019	3.74345	5.50446	0
23	0	0	1	0	0	8237.37	0.04553	1.83191	0	0.198326	3.75331	5.44262	0
23	0.171429	0	0.828571	0	0	8225	0.0762593	1.54218	0.00528948	0.0562971	4.67685	6.43669	0
23	0.25	0.21875	0.09375	0.4375	0	8267.54	0.0847723	2.20544	0.046606	0.0340767	5.02419	6.42261	0
23	0	0.324324	0.594595	0.0810811	0	8359.44	0.227658	2.41552	0.0134708	0.225051	4.97961	7.06442	0
23	0	0	0.916667	0.0833333	0	8402.22	0.432657	2.55255	0.00202703	0.270224	5.16221	7.27741	0
23	0	0	0.971429	0.0285714	0	8266.54	0.104907	1.20642	0.00142857	0.367737	5.38818	6.92459	0
23	0	0	1	0	0	8248.72	0.188818	1.02922	0	0.469319	5.30678	6.28406	0
23	0	0	1	0	0	8187.29	0.101768	1.09561	0	0.535714	4.95485	6.43315	0
23	0	0	1	0	0	8237.06	0.403988	1.02597	0	0.704895	5.31353	6.12746	0
24	0	0.125	0.09375	0.4375	0	8374.15	0.0190406	2.81583	0.0686247	0.114866	13.8262	15.9397	0
24	0	0	0.342857	0.285714	0	8346.74	0.0516878	2.61507	0.0318241	0.336227	13.3776	15.8609	0
24	0	0	0.885714	0.114286	0	8341.84	0.0803946	2.3991	0.00142857	0.325161	13.6149	16.1308	0
24	0.411765	0.176471	0.0294118	0.0294118	0	8309.83	0.0340783	2.87016	0.0899357	0.0279273	13.4859	15.6801	0
24	0.571429	0.0571429	0	0.171429	0.0285714	8314.5	0.0842884	2.77286	0.100744	0.0176468	13.5634	15.808	0
24	0	0.0857143	0.457143	0.342857	0	8360.71	0.028257	2.93597	0.0202524	0.27611	13.2533	15.6054	0
24	0.0571429	0.428571	0	0.114286	0	8335.82	0.0627325	2.84135	0.131007	0.0725969	13.6742	15.7963	0
24	0	0.121212	0.515152	0.363636	0	8347.64	0.0565737	2.78049	0.0127807	0.218068	13.337	15.6899	0
24	0	0.0571429	0.657143	0.285714	0	8358.51	0.0358876	3.12989	0.00864713	0.242172	13.2209	15.4997	0
24	0	0	0.75	0.25	0	8507.67	0.388535	2.00676	0.00613085	1.71726	11.0015	13.1452	0
24	0	0	1	0	0	8471.43	0.351564	2.06194	0	1.9322	11.3173	13.2986	0
24	0	0	0.777778	0.222222	0	8399.57	0.21469	2.34377	0.00722678	1.05887	12.076	14.6554	0
24	0	0	0.216216	0.243243	0	8343.75	0.0340434	2.98983	0.0419555	0.268035	13.6494	15.5892	0
24	0	0	0.2	0.285714	0	8341.91	0.033541	3.01128	0.0473515	0.259413	13.6287	15.5668	0
25	0	0	0.714286	0.285714	0	8208.29	0.134126	1.5125	0.00714286	0.284221	1.05978	1.91947	0.249624
25	0	0	0.558824	0.441176	0	8213.84	0.228035	1.24404	0.0153087	0.589366	1.06255	1.78742	0.246301
25	0	0	0.857143	0.142857	0	8196.23	0.472974	1.31989	0.00347222	0.84686	1.63257	2.47531	0.00429911
25	0	0	0.771429	0.114286	0	8231.26	0.120216	1.61209	0.005	0.758128	0.972824	1.21009	1.03998
25	0	0	0.27027	0.0540541	0	8357.31	0.29082	1.57499	0.0446229	0.911016	0.799536	1.16378	1.10696
25	0	0	0.8	0.2	0	8270.36	0.143523	1.47501	0.00643956	1.20031	1.32046	1.64365	0.332065
25	0	0	0.942857	0.0571429	0	8274.26	0.150677	1.49724	0.00237098	1.13958	1.28295	1.58375	0.464873
25	0	0	0.6875	0.25	0	8281.4	0.247758	1.55203	0.00661765	1.03531	1.27597	1.54311	0.536456
25	0	0	0.971429	0.0285714	0	8276.71	0.171518	1.51847	0.00142857	1.09913	1.27308	1.56425	0.491629
25	0	0	0.970588	0.0294118	0	8232.7	0.0506615	1.44227	0.000694444	1.08797	1.15213	1.58533	0.527641
25	0	0.0555556	0.0833333	0.166667	0	8340.62	0.249602	1.54747	0.0431534	0.959559	0.939436	1.26432	1.05769
25	0	0	1	0	0	8214.63	0.332718	1.33968	0	0.546011	0.931107	1.65102	0.411716
25	0	0	1	0	0	8352.89	0.474389	1.33113	0	0.647464	1.19714	2.14183	0.258213
25	0	0.0857143	0.657143	0.228571	0	8164.43	0.0606061	1.35701	0.0105852	0.903898	1.56721	2.32973	0.0132123
25	0	0	0.914286	0.0857143	0	8207.23	0.420744	1.39066	0.00142857	0.752408	1.53164	2.37798	0.0198817
27	0.0625	0.59375	0.1875	0.09375	0.0625	8204.47	0.0967014	2.97425	0.0515106	0.0545118	0.149181	0.378929	3.5656
27	0.6	0.257143	0	0.0571429	0.0857143	8188.68	0.0482396	2.82453	0.123727	0.0127807	0.431068	0.594505	3.18339
27	0.416667	0.305556	0.111111	0.166667	0	8268.58	0.0159024	2.84693	0.0365663	0.0199454	0.0302767	0.219991	3.8016
27	0.90625	0.0625	0	0	0.03125	8184.85	0.031687	2.81703	0.158908	0.00234375	0.442463	0.541367	3.14175
27	0.117647	0.264706	0.264706	0.264706	0.0882353	8227.66	0.294765	2.42474	0.0373231	0.0432132	0.365248	0.795296	3.61323
27	0.625	0.25	0	0	0.125	8186.89	0.0413695	2.84357	0.120605	0.0103458	0.421179	0.57415	3.17638
27	0	0.970588	0	0.0294118	0	8322.17	0.257633	1.69286	0.154088	0.165958	0.274481	1.38305	2.23529
27	0	0.09375	0.4375	0.40625	0.0625	8344.46	0.42035	1.89276	0.0223991	0.186091	0.0905806	1.31056	2.43782
27	0	0.15625	0.8125	0.03125	0	8350.85	0.628411	1.10641	0.0038673	0.514348	0.0470637	1.9417	0.681426
27	0	0	0.71875	0.28125	0	8326.23	0.411527	2.07781	0.00862098	0.207913	0.0394618	1.00663	3.58621
27	0	0	0.666667	0.25	0	8351.91	0.518026	0.959545	0.00714286	0.467035	0.0625	2.38911	0.677861
28	0	0.0857143	0.628571	0.257143	0	8482.14	0.442637	2.41405	0.0134489	0.40905	0.901968	1.19789	2.72789
28	0.171429	0.142857	0.6	0.0857143	0	8189.49	0.132058	3.3691	0.0065736	0.0459365	1.96921	2.77771	0
28	0.333333	0.305556	0.194444	0.166667	0	8195.26	0.0244536	3.3115	0.0550292	0.0401679	2.00561	2.72143	0
28	0.459459	0.27027	0.0540541	0.216216	0	8194.57	0.0189396	3.29631	0.0696009	0.0236859	2.0287	2.72592	0
28	0	0	0.916667	0.0833333	0	8166.34	0.173539	3.71946	0.00142857	0.247524	1.86504	2.92119	0
28	0	0.027027	0.810811	0.162162	0	8166.8	0.139405	3.68392	0.00428571	0.223631	1.79496	2.85475	0
28	0.676471	0.205882	0	0.117647	0	8159.37	0.0196006	3.77824	0.149181	0.00986339	1.80079	2.82058	0
28	0	0.0277778	0.694444	0.277778	0	8172.26	0.152023	3.66804	0.0132451	0.108028	1.63667	2.69657	0.00569765
28	0	0	0.939394	0.0606061	0	8165.03	0.152163	3.74076	0.000714286	0.213823	1.90787	2.96619	0
28	0.117647	0.852941	0	0.0294118	0	8161.91	0.0412978	3.75523	0.172861	0.0387721	1.67873	2.70243	0.00212212
29	0.171429	0.171429	0.457143	0.2	0	8293	0.0374491	2.0251	0.0262437	0.05668	0.871152	1.57846	0.938806
29	0	0	0.885714	0.114286	0	8325.97	0.207974	2.09445	0.0015625	0.22013	0.569355	1.29934	0.974593
29	0.09375	0	0.90625	0	0	8316.54	0.0539515	1.84116	0.00151515	0.0645236	0.337288	0.978331	0.910128
29	0.142857	0	0.857143	0	0	8270.72	0.235472	1.9241	0.00416316	0.0549826	0.827626	1.29075	0.878435
29	0	0.0277778	0.972222	0	0	8362.5	0.213148	1.32259	0	0.254976	0.1125	1.08847	1.12567
29	0	0.428571	0.542857	0.0285714	0	8370.34	0.365053	1.1302	0.0245122	0.108046	0.305147	1.26505	1.14755
29	0	0	1	0	0	8348.05	0.483441	1.57137	0	0.435215	0.0931477	1.33777	1.10532
29	0.382353	0.235294	0.0882353	0.294118	0	8290.29	0.0284212	1.90991	0.0458345	0.0282028	0.762165	1.60836	1.14617
29	0.514286	0.114286	0.228571	0.0857143	0.0571429	8307.2	0.0412733	1.67402	0.0436278	0.0175309	0.150965	1.70458	1.05297
29	0.666667	0.194444	0.0555556	0.0833333	0	8286.11	0.0218166	1.92281	0.0460379	0.0112796	0.748951	1.56812	1.19997
29	0.34375	0.125	0.34375	0.1875	0	8312.42	0.0593699	1.69689	0.0266366	0.0324514	0.180619	1.67963	1.13855
29	0.0571429	0.2	0.742857	0	0	8308.81	0.159339	1.79376	0.0109375	0.0756856	0.598704	1.47939	1.55886
29	0.861111	0.138889	0	0	0	8248.88	0.0274544	1.79822	0.262373	0.00375987	0.0371244	1.60309	0.950348
29	0.416667	0	0.472222	0.111111	0	8287.06	0.0293474	1.91367	0.0248309	0.029174	0.571584	1.61636	1.06811
29	0.3125	0.1875	0.375	0.125	0	8290.91	0.0361353	1.92915	0.029816	0.0374194	0.729894	1.5857	1.16621
29	0.352941	0.117647	0.352941	0.176471	0	8312.63	0.0575121	1.69394	0.0273869	0.0312778	0.177613	1.68225	1.129
29	0.189189	0.0810811	0.648649	0.0810811	0	8319.11	0.091802	1.65117	0.0133629	0.052346	0.107147	1.76775	0.952751
30	0	0	0.911765	0.0882353	0	8121.97	0.55949	1.84951	0.0015625	0.527246	3.89043	4.95534	0
30	0	0	1	0	0	8139	0.676683	1.21661	0	0.649427	3.67749	4.65483	0
30	0	0	1	0	0	8135.81	0.646806	1.21485	0	0.623072	3.65978	4.6471	0
30	0	0	1	0	0	8116.42	0.445811	2.48516	0	0.623271	4.1722	5.32667	0
30	0	0	1	0	0	8113.47	0.487568	2.44311	0	0.542982	4.08741	5.2447	0
30	0	0	1	0	0	8143.88	0.721701	1.6304	0	0.69773	3.95594	4.95992	0
30	0.114286	0.0571429	0.485714	0.0285714	0.0857143	8084	0.0393757	2.29707	0.0196647	0.0531462	3.6761	4.99468	0
30	0.0588235	0.323529	0.235294	0	0.323529	8104	0.06809	3.54101	0.043868	0.0547459	5.01562	6.52075	0
31	0	0	1	0	0	8156	0.217105	3.59844	0	0.19096	9.14919	10.1076	0
31	0.885714	0	0	0	0.0857143	8138.28	0.0196906	3.82619	0.0778253	0.00315301	9.48671	10.4573	0
31	0	0	1	0	0	8182.25	0.259245	3.28887	0	0.491175	9.36838	10.2468	0
31	0	0	1	0	0	8167.89	0.187924	3.56342	0	0.265612	9.16375	10.1062	0
31	0	0	0.411765	0	0	8166.47	0.0259828	3.13988	0.0231473	0.668383	9.03836	9.91826	0
31	0	0	1	0	0	8137.37	0.151992	3.68259	0	0.143853	8.87798	9.88134	0
31	0.441176	0	0.323529	0.235294	0	8145.36	0.0368195	3.77143	0.0279099	0.0142752	9.48008	10.4839	0
31	0	0	0.542857	0.171429	0	8165.53	0.288654	3.63164	0.0121429	0.145373	9.61031	10.5256	0
31	0	0	0.970588	0.0294118	0	8171.21	0.354965	3.55799	0	0.274111	9.48693	10.3936	0
31	0.1875	0.625	0	0.125	0.0625	8126.43	0.0326815	3.69126	0.0798024	0.031601	8.82413	9.87213	0
31	0.722222	0.0555556	0.222222	0	0	8136.12	0.0151733	3.59754	0.0488309	0.00862098	9.24533	10.2564	0
31	0.685714	0.0571429	0.0857143	0.142857	0	8127.03	0.0393251	3.78715	0.0721479	0.00785714	8.88263	9.95175	0
31	0.6	0.2	0	0	0.2	8127.05	0.0290781	3.69859	0.110652	0.0102959	8.90225	9.94748	0
31	1	0	0	0	0	8137.16	0.0165475	3.74671	0.0768014	0	9.37792	10.3675	0
32	0.657143	0.142857	0	0	0.0285714	8094	0.053668	3.64127	0.229953	0.0088673	7.12737	8.49775	0
32	0.411765	0.147059	0.0882353	0.147059	0.205882	8102.11	0.0710441	3.72709	0.0672754	0.0288381	6.70419	8.09699	0
32	0.138889	0.194444	0.166667	0.305556	0.194444	8103.53	0.0946615	3.77115	0.0505687	0.0525466	6.69428	8.08096	0
32	0.147059	0.176471	0.147059	0.323529	0.205882	8103.46	0.0916498	3.76983	0.0517682	0.0507806	6.69678	8.08374	0
32	0.171429	0.257143	0.0857143	0.342857	0.142857	8105.34	0.0924267	3.78032	0.0521896	0.0561365	6.72436	8.10295	0
32	0	0.294118	0.705882	0	0	8104	0.0507963	3.60152	0.00773459	0.0994747	5.14159	6.61995	0
32	0.0571429	0.542857	0	0.314286	0.0571429	8099.89	0.0265241	3.57616	0.122702	0.0593233	5.44007	6.93645	0
32	0.611111	0.277778	0	0.0555556	0.0555556	8102.79	0.0371143	3.68479	0.106948	0.0142661	5.30529	6.79372	0
32	0	0.142857	0.685714	0	0.0857143	8110.69	0.0723555	3.76412	0.0132451	0.110507	6.03985	7.41336	0
32	0	0	1	0	0	8127.66	0.0722182	3.59678	0	0.321141	5.54876	6.85426	0
32	0.027027	0.108108	0.567568	0	0	8106.53	0.0410888	4.00901	0.0156102	0.0820426	6.33785	7.6808	0
32	0.176471	0.411765	0	0.147059	0.205882	8099.37	0.0264442	3.5829	0.138861	0.0380333	5.3718	6.88113	0
32	0	0.0857143	0.428571	0.485714	0	8096.72	0.0399018	3.49636	0.0298631	0.109597	5.60624	7.1042	0
32	0.72973	0.216216	0	0.027027	0.027027	8102.15	0.0349628	3.66802	0.114977	0.00838798	5.36772	6.85247	0
33	0.0857143	0.371429	0.171429	0.342857	0	8101.63	0.0340417	3.62997	0.0574794	0.059673	5.63244	7.08973	0
33	0	0.285714	0	0.714286	0	8096.61	0.0300043	3.51569	0.0997632	0.0972681	5.68287	7.16478	0
33	0	0	0.0588235	0.941176	0	8162.41	0.0599745	2.95529	0.0465325	0.690923	6.2601	7.33053	0
33	0	0.0571429	0.657143	0.228571	0	8181.09	0.0330234	2.26256	0.00958158	1.46907	6.29811	7.19403	0
33	0	0	0.638889	0.138889	0	8185.37	0.017612	2.18275	0.00723209	1.29679	6.94678	7.90608	0
33	0	0	0.142857	0.857143	0	8186.29	0.0487915	2.22267	0.0571715	1.48988	6.49076	7.38105	0
33	0	0	0.147059	0.852941	0	8185.22	0.119401	2.26153	0.0466583	1.39734	6.45441	7.36458	0
33	0	0	0.114286	0.857143	0	8188.57	0.0775536	2.09232	0.0464905	1.65555	6.52961	7.38276	0
33	0	0	0.142857	0.857143	0	8188.64	0.0375211	2.157	0.0685261	1.55427	6.61446	7.49284	0
33	0	0	0.657143	0.342857	0	8186.26	0.207193	2.21177	0.0117188	1.38305	6.65201	7.57105	0
33	0	0	0.571429	0.428571	0	8186.06	0.207967	2.21854	0.0134821	1.3762	6.63325	7.55314	0
33	0	0	0.411765	0.529412	0	8179.37	0.079974	2.31657	0.0265282	1.40336	6.28786	7.19928	0
33	0	0	0.375	0.625	0	8186.19	0.187165	2.22335	0.0283216	1.3971	6.61675	7.53208	0
34	0.864865	0	0	0	0.135135	7886.86	0.0362728	3.26392	0.101505	0.00337838	2.89692	6.06766	0
34	0.971429	0	0	0.0285714	0	7891.2	0.0560369	3.16946	0.0842874	0.000714286	2.93181	6.09734	0
34	0.885714	0	0.114286	0	0	7897.22	0.0865022	3.09597	0.0561264	0.00285714	2.99908	6.07722	0
34	0	0	1	0	0	7936.19	0.271728	2.83389	0	0.387108	3.23489	6.30456	0
34	0	0	1	0	0	7949.43	0.149531	3.06877	0	0.179416	2.68096	6.3567	0
34	0	0	1	0	0	8032.29	0.140615	1.43598	0	2.19217	3.90657	6.68292	0
34	0	0.0625	0.9375	0	0	8077.38	0.0414286	1.40775	0.00214286	2.86274	4.20878	6.52505	0
34	0.0833333	0.361111	0.138889	0.416667	0	7871.86	0.057569	3.76972	0.063386	0.0420974	0.426073	7.83984	0.150999
34	0	0	0.96875	0.03125	0	7975.14	0.0298422	1.33938	0.00078125	1.62827	3.04684	7.53099	0
34	0	0	1	0	0	7973.26	0.0903806	1.51118	0	1.55262	3.2573	7.32505	0
35	0.685714	0.0285714	0	0	0.285714	8127.71	0.0314174	3.70544	0.107983	0.00815301	8.93724	9.97891	0
35	0.914286	0	0	0	0.0857143	8138.11	0.0180695	3.8264	0.0786437	0.00214286	9.48245	10.4536	0
35	0.5	0.294118	0	0	0.205882	8126.69	0.0276658	3.69648	0.109211	0.0138444	8.89013	9.93651	0
35	0	0	1	0	0	8145.57	0.162746	3.618	0.000714286	0.126342	9.18399	10.1526	0
35	0	0.0625	0.65625	0	0	8142.46	0.0637895	3.55747	0.0111788	0.515393	8.636	9.59345	0
35	0	0	0.405405	0	0	8155.61	0.0622483	3.56395	0.0203419	0.430063	8.19053	9.22652	0
35	0	0	0.911765	0.0882353	0	8135.69	0.0620784	3.60265	0.00147059	0.341268	8.48355	9.51108	0
35	0	0.0571429	0.657143	0	0	8142.97	0.0773394	3.54052	0.0107604	0.535604	8.61205	9.56961	0
35	0	0.0857143	0.514286	0	0	8143.03	0.0461983	3.47494	0.0197198	0.627885	8.39691	9.37166	0
35	0	0	0.971429	0	0	8157.14	0.207695	3.66693	0	0.176194	9.30212	10.2474	0
36	0.142857	0.542857	0	0	0.2	8103.11	0.046901	3.66623	0.106836	0.0562625	5.24111	6.73722	0
36	0.0555556	0.416667	0.388889	0	0.138889	8099.26	0.056298	3.27793	0.0303908	0.0593312	5.06551	6.62038	0
36	0.147059	0.352941	0.205882	0.147059	0.147059	8103.94	0.142468	3.45409	0.0534957	0.0424714	4.87288	6.39749	0
36	0	0	0.527778	0.472222	0	8104	0.0225309	3.70325	0.0166893	0.400398	4.77381	6.22305	0
36	0	0	0.594595	0.405405	0	8104	0.0224334	3.71955	0.0122493	0.407824	4.78768	6.23473	0
36	0	0	1	0	0	8104	0.0574262	3.61944	0	0.11827	5.08009	6.55618	0
36	0	0	1	0	0	8104.18	0.0792905	3.09357	0	0.870175	4.56871	5.80716	0
36	0	0	0.6875	0.28125	0	8153.7	0.0234507	1.9593	0.00642857	1.59197	5.35382	6.28415	0
36	0	0	1	0	0	8136.57	0.0191632	2.20862	0	1.32727	5.21731	6.259	0
37	0.4	0.371429	0.114286	0	0	7906.45	0.0253029	5.14166	0.050895	0.0254688	2.42706	3.98428	0
37	0.0606061	0.333333	0.454545	0	0.151515	7942.47	0.114991	5.06704	0.0230734	0.0645665	2.29557	3.90023	0
37	0	0	0	1	0	7948.94	0.265072	4.4368	0.11183	0.346765	1.85105	3.6239	0
37	0.571429	0.257143	0.0285714	0	0.142857	7923.03	0.0178729	4.63447	0.067555	0.0129032	2.17441	4.0035	0
37	0	0	0.972222	0.0277778	0	7940.44	0.0554037	4.31968	0.000694444	0.434226	2.2887	4.21315	0
37	0	0	1	0	0	7955.84	0.126654	3.82607	0	0.748812	2.23193	4.17283	0
37	0	0	0.914286	0.0857143	0	7952.41	0.15177	4.04375	0.00135135	0.529103	2.09315	4.02318	0
38	0.540541	0.297297	0	0	0.135135	8104.36	0.0321402	3.53313	0.173041	0.0130018	7.88674	9.15809	0
38	0.529412	0.235294	0	0	0.0588235	8104.34	0.0240406	3.57966	0.211775	0.0138444	7.83223	9.09298	0
38	0.375	0.46875	0	0.125	0.03125	8101.76	0.0163521	3.48355	0.177029	0.0264404	7.69296	8.98245	0
38	0.378378	0.567568	0	0	0.0540541	8103.47	0.0437618	3.50617	0.120196	0.0244595	7.51521	8.81673	0
38	0.53125	0.25	0.03125	0.1875	0	8098.25	0.0279032	3.53433	0.0854394	0.0174223	7.46889	8.79796	0
38	0	0	0.0571429	0.942857	0	8192.5	0.0546246	2.06976	0.0623332	1.67741	6.70091	7.55406	0
38	0	0	0.542857	0.142857	0	8185.03	0.0389522	2.20938	0.0122477	1.28114	6.84375	7.79724	0
38	0	0	0.257143	0.4	0	8181.53	0.0348191	2.16805	0.0243365	1.62949	6.28323	7.14151	0
38	0	0	0.15625	0.84375	0	8185.88	0.0716315	2.23824	0.0554541	1.45881	6.47901	7.37646	0
38	0	0	0.428571	0.571429	0	8189.71	0.0418876	2.12143	0.0301471	1.57063	6.6851	7.56245	0
38	0.694444	0.277778	0	0	0.0277778	8109.38	0.0304991	3.63825	0.16394	0.00890863	8.07633	9.29458	0
38	0.342857	0.142857	0	0	0.314286	8104.54	0.019459	3.57728	0.179657	0.0258986	7.7824	9.03996	0
38	1	0	0	0	0	8227.17	0.119072	1.3611	0.525954	0	0.633806	2.45309	0.132147
38	0.828571	0.114286	0	0	0	8106.4	0.0142752	3.58871	0.266383	0.00428571	7.90048	9.14115	0
39	0	0	1	0	0	7932.77	0.0243779	3.51952	0	0.115162	3.86522	4.35743	0
39	0.0588235	0	0.911765	0	0	7926.47	0.0249235	3.54604	0.00214286	0.0784119	3.82923	4.39376	0
39	0	0	0.722222	0.0277778	0.0833333	7926.16	0.0351733	3.64071	0.0081361	0.0859793	3.79755	4.4221	0
39	0.0294118	0	0.882353	0	0.0294118	7927.53	0.0311756	3.58257	0.00458158	0.0854704	3.81754	4.40356	0
39	0.264706	0.0294118	0.676471	0	0	7917.71	0.0260652	3.53625	0.0145797	0.0410977	3.79915	4.42711	0
39	0	0	0.942857	0	0	7928.26	0.0303851	3.56724	0.00277778	0.0912381	3.8232	4.39808	0
39	0.0588235	0	0.794118	0	0.0588235	7925.49	0.0337908	3.58969	0.0050111	0.0722985	3.80911	4.41196	0
39	0	0	0.611111	0.277778	0	7918.47	0.0861814	3.62196	0.00902778	0.241209	3.47094	4.77676	0
39	0	0	1	0	0	7962.48	0.0168931	2.38673	0	1.36988	4.44853	4.39365	0
39	0	0	1	0	0	7963.46	0.0599365	2.57425	0.000714286	1.38359	4.18278	4.12773	0
42	0	0.0277778	0.611111	0.361111	0	8303.5	0.716428	2.08795	0.0140574	0.0922062	0.213818	1.27081	2.43458
42	0	0.71875	0	0.28125	0	8291.17	0.72649	2.19816	0.238506	0.110812	0.492057	1.41154	1.40132
42	0.416667	0.305556	0.111111	0.166667	0	8268.58	0.0159024	2.84693	0.0365663	0.0199454	0.0302767	0.219991	3.8016
42	0.90625	0.0625	0	0	0.03125	8184.85	0.031687	2.81703	0.158908	0.00234375	0.442463	0.541367	3.14175
42	0.28125	0.34375	0.09375	0.09375	0.1875	8238.82	0.375159	2.38097	0.0526222	0.0293461	0.320972	0.891048	3.5173
42	0.625	0.25	0	0	0.125	8186.89	0.0413695	2.84357	0.120605	0.0103458	0.421179	0.57415	3.17638
42	0	0.970588	0	0.0294118	0	8322.17	0.257633	1.69286	0.154088	0.165958	0.274481	1.38305	2.23529
42	0	0	1	0	0	8360.34	0.649429	1.0517	0	0.584243	0.0544767	2.05859	0.670609
42	0	0.15625	0.8125	0.03125	0	8350.85	0.628411	1.10641	0.0038673	0.514348	0.0470637	1.9417	0.681426
42	0	0	1	0	0	8368.86	0.666617	0.978213	0	0.608342	0.0235938	2.18904	0.65259
42	0	0	0.666667	0.25	0	8351.91	0.518026	0.959545	0.00714286	0.467035	0.0625	2.38911	0.677861
42	0	0	0.416667	0.583333	0	8522.15	0.490487	2.08515	0.0199408	0.48494	1.13063	1.33982	1.64284
42	0	0.138889	0.777778	0.0833333	0	8231.03	0.0273271	2.23002	0.00529587	0.109784	0.0325465	0.0832227	3.99286
42	0	0	1	0	0	8321.6	0.251966	1.61083	0	0.248786	0.40741	1.76902	0.849864
42	0	0.542857	0	0.457143	0	8319.03	0.546487	1.94437	0.139189	0.109192	0.164591	1.77894	0.600724
42	0	0.314286	0.0285714	0.657143	0	8341.34	0.907032	1.9305	0.0728427	0.116594	0.316224	1.48371	1.05365
42	0.111111	0.25	0.194444	0.277778	0.166667	8286.12	0.623421	2.15529	0.0359365	0.0434324	0.170258	1.17859	2.97698
43	1	0	0	0	0	8114.77	0.296299	3.01758	0.0128236	0	2.82943	3.87179	0
43	0	0	0.885714	0.114286	0	8107.31	0.376658	2.87915	0.00277778	0.0655347	3.04602	4.02984	0
43	0.34375	0.15625	0.4375	0	0	8124.5	0.0268898	2.84531	0.00803046	0.0346334	2.48632	3.56408	0
43	1	0	0	0	0	8110.83	0.140137	2.93192	0.00416316	0	3.06489	3.86362	0
43	0.657143	0	0.342857	0	0	8113.06	0.0389706	3.04654	0.00625	0.0137447	2.90203	3.74237	0
43	0.702703	0	0.297297	0	0	8117.82	0.0827751	3.0772	0.00220588	0.0105745	2.70941	3.68453	0
43	0.138889	0	0.777778	0	0	8116.11	0.0270373	3.07124	0.00208333	0.0626228	2.98946	3.74024	0
43	0	0	0.8	0.2	0	8113.88	0.0425413	2.93425	0.00649149	0.186744	3.24047	3.8911	0
43	0	0.147059	0.735294	0.117647	0	8120.44	0.0196159	3.11832	0.00694444	0.235676	3.00621	3.68604	0
43	0	0	0.941176	0.0588235	0	8127.94	0.0585967	3.18691	0.00285714	0.288633	2.88717	3.54261	0
43	0.15625	0	0.8125	0	0	8116.74	0.0322967	3.10339	0.000714286	0.0547565	2.9522	3.70534	0
43	0.0571429	0	0.942857	0	0	8106.97	0.278015	2.8817	0	0.0770961	3.22345	4.02115	0
43	0.857143	0.0285714	0.0857143	0.0285714	0	8110.19	0.387821	2.90374	0.0435973	0.0038673	2.94926	3.98223	0
43	0.555556	0.0277778	0.416667	0	0	8122.57	0.112314	2.87858	0.00653765	0.0140574	2.59628	3.68722	0
43	1	0	0	0	0	8117.37	0.286088	2.95113	0.0167495	0	2.77595	3.86034	0
44	0.4	0.0571429	0.371429	0	0	8238.17	0.0136049	3.52469	0.0299122	0.0314888	1.40486	2.95836	0.0747783
44	1	0	0	0	0	8227.63	0.06581	3.38316	0.163288	0	1.30997	2.91155	0.0747783
44	0.972222	0	0	0	0	8226.63	0.0383657	3.3678	0.106398	0.000694444	1.36982	2.87344	0.0747783
44	1	0	0	0	0	8217.56	0.0120693	3.3827	0.091276	0	1.41365	2.74249	0.0747783
44	0	0	1	0	0	8265.78	0.112884	3.27352	0	0.142686	1.63179	2.54955	0.0377745
44	0	0	1	0	0	8284.23	0.149689	3.79154	0	0.164097	1.51881	3.04661	0.0604321
44	0	0	1	0	0	8285.6	0.347727	3.75437	0	0.377877	1.70525	3.03071	0.00523121
44	0	0	1	0	0	8284.09	0.12566	3.69884	0	0.170039	1.54119	2.92364	0.0629417
44	0	0	1	0	0	8277.25	0.155975	3.58408	0	0.197359	1.59514	2.81258	0.0527323
44	0	0	1	0	0	8231.19	0.0531382	2.89871	0	0.284026	2.19337	3.67273	0
44	0	0	1	0	0	8310.97	0.0336369	4.0766	0	0.1713	1.92468	5.63799	0
44	0	0	1	0	0	8282.46	0.27466	4.25092	0	0.301145	1.2872	4.32948	0.0512574
44	0.794118	0	0.147059	0.0588235	0	8274.84	0.0129561	4.52869	0.0558697	0.00666507	1.04454	4.6235	0.0717439
44	0.942857	0	0.0285714	0.0285714	0	8268.91	0.0198216	4.54922	0.084885	0.00142857	1.03531	4.64684	0.0723444
44	0.638889	0	0.277778	0.0833333	0	8280.27	0.0137944	4.53514	0.0418181	0.0142661	1.06507	4.63526	0.0703276
47	0.485714	0.2	0.285714	0.0285714	0	8614.14	0.485338	1.0229	0.0170203	0.0140406	0.164257	4.20319	0.150737
47	0	0.228571	0.685714	0.0857143	0	8620	0.0418876	0.78064	0.00934353	0.496275	0.424021	4.38128	0.150737
47	0	0.285714	0.628571	0.0571429	0	8618.22	0.0309263	0.894675	0.00986339	0.445632	0.427936	4.32846	0.150737
47	0	0.21875	0.65625	0.125	0	8622.69	0.0320597	0.800176	0.00916316	0.470841	0.37526	4.40049	0.150737
47	0.625	0.1875	0.1875	0	0	8573.85	0.529039	1.20415	0.0158531	0.0125504	0.389297	3.9643	0.150737
47	0.542857	0.0857143	0.371429	0	0	8579.16	0.502694	1.2157	0.0115847	0.0157604	0.429052	3.9466	0.150737
47	0	0.0285714	0.771429	0.2	0	8636.06	0.408758	0.898017	0.00540541	0.11045	0.0640352	4.35251	0.150737
48	0.333333	0	0.666667	0	0	8299.71	0.0801894	1.94302	0.00991082	0.0375163	1.27651	8.01722	0.059773
48	0.21875	0.0625	0.71875	0	0	8243.12	0.0320102	1.92414	0.00743872	0.0333637	1.37341	7.67537	0.100749
49	0	0	1	0	0	8392.05	0.238329	1.66056	0	1.34153	0.801892	6.8816	0.108948
49	0	0	1	0	0	8327.4	0.141881	4.0269	0	0.227978	1.76299	5.87672	0
49	0.34375	0.0625	0.46875	0.03125	0.0625	8311.46	0.0316019	3.6975	0.0247549	0.0361301	1.86671	6.13115	0
49	0	0.09375	0.90625	0	0	8405.43	0.0347577	1.62794	0.00294118	1.36836	1.74157	7.61211	0.000349885
49	0	0	1	0	0	8409.4	0.216944	1.49899	0	1.26327	1.58462	7.59452	0.0169365
49	0	0.0285714	0.828571	0.142857	0	8405.94	0.0729692	1.66748	0.00365825	1.20931	1.56227	7.37973	0.0176767
49	0	0	1	0	0	8409.86	0.298275	1.34248	0	1.125	1.53219	7.626	0.0268827
49	0	0	1	0	0	8387.54	0.205683	1.77253	0	1.37308	0.653404	6.74251	0.122546
49	0	0.09375	0.71875	0.1875	0	8401.77	0.0357043	1.66272	0.00773459	1.18401	1.64742	7.41784	0.00645112
49	0	0.166667	0.833333	0	0	8404.77	0.0386316	1.63532	0.00428571	1.34105	1.71295	7.57173	0.00127029
49	0	0	1	0	0	8410.11	0.0297883	1.53208	0	1.40418	1.8078	7.73357	0
50	0.705882	0.0294118	0.147059	0.117647	0	8304.77	0.214178	2.0832	0.0496719	0.00869737	0.272143	8.92708	0.430653
50	0.5	0.117647	0.382353	0	0	8324.08	0.0875	2.09101	0.0264276	0.0228967	0.1125	9.14347	0.430653
50	0.685714	0.142857	0	0.171429	0	8330.86	0.1	2.37159	0.143662	0.0118119	0.0980749	9.04043	0.426125
50	0	0.571429	0.285714	0.142857	0	8329.88	0.220319	2.11815	0.0415553	0.204483	0.306556	8.7678	0.429961
50	0	0.125	0.53125	0.34375	0	8317.21	0.222143	2.03818	0.0126188	0.0853509	0.247143	9.02321	0.430653
50	0.0285714	0.542857	0.342857	0.0857143	0	8306.94	0.274939	2.11363	0.0279627	0.052414	0.364286	8.76494	0.419912
50	0	0	0.96875	0.03125	0	8329.47	0.407518	2.16699	0.000714286	0.373593	0.43388	7.53524	0.355289
51	1	0	0	0	0	8268.83	0.0331717	4.55817	0.113177	0	1.03531	4.6659	0.0723091
51	1	0	0	0	0	8277.81	0.0229725	4.70624	0.0995898	0	1.27966	4.91853	0.0457585
51	1	0	0	0	0	8276.5	0.0388575	4.6846	0.216138	0	1.19581	4.86665	0.0559958
51	1	0	0	0	0	8277.09	0.0230852	4.69847	0.106893	0	1.25977	4.89965	0.0480944
51	0	0	1	0	0	8311.72	0.0404645	4.54512	0	0.177856	1.32259	4.84067	0.041456
51	0.205882	0	0.588235	0	0	8281.84	0.09393	4.26845	0.00757576	0.0527559	1.02163	4.23824	0.0747783
51	0	0	1	0	0	8383.65	0.216357	3.02106	0	0.233478	1.68447	6.37796	0.0020582
51	0.342857	0	0.514286	0.142857	0	8324.23	0.0289057	3.36111	0.0161023	0.0350678	1.88285	6.35059	0
51	0	0	0.971429	0.0285714	0	8353.89	0.136616	3.55507	0	0.181517	1.68344	5.75649	0.0023815
51	0.428571	0	0.257143	0.314286	0	8315.29	0.0260204	3.52901	0.0220664	0.0280305	1.86808	6.08183	0
52	1	0	0	0	0	8254	0.214964	3.18146	0.192821	0	0.260974	3.0983	0.0747783
52	1	0	0	0	0	8265.31	0.268496	3.45157	0.175179	0	0.248323	3.4702	0.0747783
52	0.371429	0.314286	0.0857143	0.228571	0	8267.6	0.026317	3.95719	0.0790041	0.0325592	0.530742	3.93097	0.0747783
52	1	0	0	0	0	8232.06	0.19066	3.64434	0.233847	0	0.495494	3.16746	0.0747783
52	0.0571429	0.0857143	0.542857	0.314286	0	8265.81	0.0399154	3.73801	0.0105917	0.0794476	0.189746	3.61394	0.0747783
52	0.216216	0.351351	0.162162	0.27027	0	8267.71	0.0330947	3.93586	0.0566252	0.0513954	0.534663	3.89066	0.0747783
52	0.648649	0.162162	0.027027	0.162162	0	8314.23	0.15426	4.11597	0.0756254	0.0132049	0.987403	5.20543	0.11566
52	1	0	0	0	0	8266.75	0.120123	4.39579	0.250193	0	0.84444	4.46546	0.0747783
52	0.0294118	0.205882	0.558824	0.205882	0	8307.5	0.0250152	4.00108	0.0160279	0.0746365	1.17131	4.79778	0.144893
52	0.0571429	0.942857	0	0	0	8299	0.114451	2.54575	0.156835	0.069073	1.19947	4.21196	0.0830788
52	0	1	0	0	0	8300.46	0.208821	2.34117	0.126779	0.107241	1.18474	4.08072	0.0747783
52	0	0.676471	0.264706	0.0588235	0	8299.12	0.214626	2.27291	0.0404907	0.114731	1.11532	3.97361	0.0747783
53	0	0.176471	0.0588235	0.764706	0	8238.53	0.688594	2.44272	0.070363	0.101664	0.552497	1.13024	2.60824
53	0.2	0.485714	0	0.314286	0	8271.5	0.445019	1.96219	0.0930027	0.0325418	0.262332	1.75691	0.591297
53	0	0.285714	0.171429	0.542857	0	8343.54	0.424846	1.77059	0.038685	0.186301	0.2465	2.11161	0.461891
53	0	0.685714	0.0571429	0.257143	0	8349.66	0.656071	1.86235	0.079284	0.220969	0.102402	1.80644	0.609647
53	0	0.4	0.114286	0.485714	0	8349.31	0.5875	1.84431	0.0504097	0.205009	0.0660739	1.87687	0.57603
53	0.114286	0.542857	0	0.342857	0	8283.36	0.436454	1.89968	0.10014	0.059522	0.23421	1.81203	0.57634
53	0	0.0540541	0.351351	0.594595	0	8370.86	0.541307	1.69107	0.0336419	0.145362	0.229364	2.16366	0.484466
53	0	0.428571	0.0285714	0.542857	0	8309.94	0.457353	1.86106	0.0881191	0.137579	0.176085	1.89657	0.540226
53	0	0.0833333	0.805556	0.111111	0	8382.73	0.407276	1.78711	0.003125	0.0971398	0.491596	2.4026	0.407345
53	0.117647	0.264706	0.264706	0.352941	0	8371.38	0.502938	1.67123	0.0449405	0.0653583	0.317353	2.24876	0.460362
54	0.0857143	0.285714	0.285714	0.0285714	0.0857143	8062.92	0.0190389	4.65986	0.0331059	0.0454876	3.00549	4.24744	0
54	0.8	0.0571429	0	0	0.142857	8055.94	0.0255613	4.68181	0.125169	0.005	3.11551	4.39636	0
54	0.657143	0.0857143	0.142857	0.0571429	0.0571429	8063.86	0.0167244	4.74788	0.0476246	0.00958158	3.02597	4.32646	0
54	0.911765	0.0882353	0	0	0	8083.34	0.0820129	4.78476	0.181594	0.00220588	2.6377	4.02713	0
54	0	0.4375	0.34375	0	0	8064.42	0.129653	3.29088	0.0179493	0.0888577	1.39699	3.06828	0.0391849
54	0	0	1	0	0	8111.69	0.0311082	1.68117	0	0.503812	0.5	1.76371	0.204165
55	0	0	0	1	0	8462.74	0.0909259	1.76486	0.115989	0.9279	5.12963	8.28692	0
55	0	0.96875	0	0.03125	0	8522.82	0.123495	1.64433	0.183802	0.549434	6.36435	9.61363	0
55	0	0.25	0	0.75	0	8518.09	0.409164	1.8972	0.0732862	1.07325	5.57192	8.78421	0
55	0	0.125	0.375	0.5	0	8540.84	0.28057	1.97277	0.0193365	0.967924	5.72805	8.84691	0
55	0	0	0.735294	0.264706	0	8556.83	0.241667	2.00937	0.0083928	1.06527	5.83376	8.97863	0
55	0	0.166667	0.305556	0.527778	0	8527.89	0.364281	1.94619	0.0228728	1.00993	5.65768	8.81494	0
55	0	0	0.941176	0.0588235	0	8560.31	0.244286	1.99615	0.00214286	1.07543	5.87438	9.0439	0
55	0	0.885714	0	0.114286	0	8518.8	0.0907683	1.67014	0.136396	0.562564	6.35732	9.67817	0
55	0	0.351351	0.0540541	0.594595	0	8441.2	0.0313521	1.64782	0.0601166	0.705302	4.96443	7.84542	0
55	0	0.34375	0	0.65625	0	8438.16	0.0559783	1.67545	0.085927	0.664739	5.01356	7.88898	0
55	0	0.0625	0	0.9375	0	8451.69	0.0865054	1.74963	0.119424	0.752082	5.11614	8.14078	0
55	0	0	0.2	0.8	0	8497.66	0.384464	1.84811	0.0337561	0.810197	5.43179	8.51034	0
55	0	0	0.162162	0.837838	0	8491.86	0.351363	1.83794	0.0407837	0.744464	5.39545	8.4388	0
55	0	0.15625	0.25	0.59375	0	8494.5	0.358177	1.83916	0.0403218	0.639826	5.40087	8.37752	0
55	0	0	0.0285714	0.971429	0	8566.09	0.112959	1.64976	0.0626488	0.758346	6.22208	9.658	0
55	0	0.264706	0.264706	0.470588	0	8525.68	0.41856	1.92754	0.0320751	1.1275	5.63007	8.86227	0
55	0	0.314286	0.0571429	0.628571	0	8537.09	0.0328629	1.4685	0.0687197	0.60476	6.52318	9.98903	0
56	0.486486	0	0.486486	0.027027	0	8216.41	0.0286331	3.09046	0.0220259	0.024742	0.147403	1.09092	1.15392
56	0.71875	0	0.1875	0.09375	0	8217.23	0.0299583	2.63204	0.0452317	0.00924096	0.185847	1.19395	0.914978
56	0	0.0625	0.53125	0.375	0	8260.54	0.142048	2.01294	0.015667	0.118967	0.0635824	1.75029	0.567805
56	0.171429	0.142857	0.0571429	0.542857	0	8241.49	0.0635224	2.09128	0.0535786	0.0500355	0.139754	1.64488	0.721942
56	0	0	1	0	0	8198.77	0.085139	2.56015	0	0.763186	0.0304688	0.556192	1.31586
56	0.0285714	0.2	0.542857	0.228571	0	8171.67	0.0377855	3.3529	0.018541	0.0789715	0.128735	0.388172	1.48766
56	0	0.0857143	0.857143	0.0571429	0	8181.5	0.0581248	3.04454	0.00367647	0.0967339	0.0433711	0.314532	1.21347
57	0.75	0.09375	0	0.125	0	8154.26	0.209734	2.30227	0.134324	0.00735485	0.968919	1.26161	0.751528
57	0.794118	0.205882	0	0	0	8151.4	0.0429373	2.42854	0.204813	0.00514706	0.856928	1.12581	0.585557
57	0.1875	0.1875	0.25	0.34375	0	8145.39	0.0243997	2.31359	0.0336105	0.0398746	0.447137	0.681575	0.63764
57	0.657143	0.114286	0	0.0857143	0	8153.92	0.174737	2.30911	0.188842	0.00987745	0.9125	1.19922	0.702886
57	0.833333	0.111111	0	0	0	8146.38	0.0177346	2.42316	0.0851668	0.00416667	0.584832	0.822339	0.575425
57	0.0882353	0.0294118	0.147059	0.735294	0	8144.91	0.121154	2.54904	0.0384673	0.056383	0.839614	1.06211	0.503238
57	0.0810811	0.027027	0.108108	0.783784	0	8145.34	0.132232	2.54867	0.0406729	0.0622219	0.829499	1.0483	0.498788
57	0.722222	0.166667	0.0277778	0.0555556	0	8147.44	0.0196084	2.41194	0.0663322	0.00694444	0.569368	0.814998	0.589136
57	0	0	0	1	0	8138.16	0.163851	2.64931	0.0757701	0.0907876	0.945715	1.16324	0.47243
58	0	0	0.444444	0.555556	0	8381.74	0.114211	3.40837	0.0216174	0.399444	1.3759	2.01768	0.0376083
58	0	0.0285714	0.8	0.114286	0.0285714	8411.19	0.0905527	2.83126	0.00357143	0.352888	1.33159	2.73804	0.057945
58	0	0.722222	0.194444	0.0833333	0	8621.54	0.398696	1.60996	0.0427265	0.626502	0.567135	3.16654	0.186651
58	0	0.742857	0	0.142857	0	8534.31	0.562532	1.87132	0.131967	0.518798	1.72826	4.18278	0.000388654
58	0	0.222222	0.138889	0.333333	0.0555556	8511.28	0.631243	1.8929	0.0371882	0.583166	1.82053	4.14389	0
58	0	0.277778	0.166667	0.555556	0	8438.31	0.562724	2.03158	0.039678	0.408949	1.88663	3.86086	0
58	0	0.114286	0.8	0.0857143	0	8491.75	0.633016	1.92887	0.00540541	0.580535	1.87834	4.10222	0
58	0	0.0277778	0.527778	0.444444	0	8451.34	0.0705007	1.62197	0.0169852	0.462319	1.26482	4.09979	0.143671
58	0	0.0833333	0.416667	0.5	0	8455.28	0.0837907	1.63106	0.024274	0.484763	1.28247	4.12685	0.142591
58	0	0.142857	0.8	0.0571429	0	8442.34	0.0592575	1.69004	0.00572406	0.334344	1.238	3.99695	0.141108
58	0	0.228571	0.628571	0.0857143	0	8446.69	0.0483503	1.39211	0.00844888	0.423073	1.10636	3.9647	0.164549
58	0	0.0882353	0.235294	0.676471	0	8387.26	0.0360703	3.30807	0.03906	0.44168	1.28909	2.11148	0.0487672
58	0	0.34375	0.53125	0.125	0	8497.06	0.252762	2.07946	0.0166462	0.678695	0.923423	2.93988	0.124666
58	0	0.25	0.15625	0.5625	0.03125	8416.59	0.0635574	2.90268	0.0414091	0.517812	1.18816	2.63111	0.0741674
58	0	0.342857	0.171429	0.142857	0.142857	8442.16	0.126872	2.7631	0.03177	0.621947	1.07198	2.63502	0.0890661
58	0	0.21875	0.625	0.15625	0	8502.44	0.219506	2.00043	0.0142092	0.717431	0.875567	2.92273	0.131255
58	0	0.117647	0.705882	0.0588235	0.0294118	8503.09	0.298013	2.06872	0.00765751	0.621997	0.950169	2.99988	0.12463
59	1	0	0	0	0	8199.62	0.153327	2.59736	0.173132	0	1.07428	3.49536	0.0979439
59	0.314286	0.257143	0.0571429	0.371429	0	8204.21	0.255531	2.58868	0.0651853	0.033114	1.06446	3.54321	0.111877
59	0.71875	0.0625	0	0.21875	0	8201.94	0.0306233	2.68594	0.10147	0.00735485	0.712795	3.25988	0.189142
59	0.285714	0.342857	0	0.371429	0	8185.43	0.0354848	2.79065	0.153838	0.0252655	0.524102	2.9776	0.184968
59	0	0.0571429	0.942857	0	0	8341	0.40211	1.96603	0.00142857	0.438612	2.28729	4.87733	0
59	0	0	1	0	0	8335.29	0.330048	2.02916	0	0.356982	2.3626	4.93802	0
59	0	0.314286	0.457143	0.228571	0	8602.46	0.297864	0.737904	0.0147097	0.407412	0.0271585	2.86192	1.13257
59	0	0.027027	0.756757	0.216216	0	8442.31	0.247707	0.997546	0.00653765	0.678883	0.109962	2.41273	1.1978
59	0	0.371429	0.457143	0.171429	0	8802.19	0.428451	0.628165	0.0189625	0.280629	0.0319718	3.49009	1.02728
59	0	0.371429	0.0571429	0.142857	0	8831.21	0.298148	0.666933	0.066771	0.581452	0.0599081	3.73468	0.985186
59	0	0.285714	0.4	0.142857	0.0857143	8758.56	0.523491	0.65169	0.0300707	0.128566	0.0618148	3.33309	1.0332
59	0	0.235294	0.441176	0.323529	0	8560.51	0.341295	0.820125	0.0156196	0.514697	0.0295822	2.72334	1.16544
60	1	0	0	0	0	8178	0.0367244	2.52389	0.341016	0	11.2025	12.0686	0
60	1	0	0	0	0	8184	0.0858018	2.54186	0.373239	0	11.5855	12.4539	0
60	0	0.111111	0	0.777778	0.111111	8163.47	0.0354281	2.62076	0.103654	0.110498	10.6376	11.475	0
60	0	0.46875	0	0.125	0.28125	8165.4	0.029816	2.53783	0.1059	0.222074	10.8522	11.6758	0
60	0	0.30303	0.242424	0	0.393939	8170.39	0.0729515	2.54102	0.0466654	0.292779	10.8342	11.6473	0
60	0.0540541	0.405405	0.0810811	0.405405	0.0540541	8159.97	0.0444578	2.69043	0.0422585	0.0610662	10.5181	11.366	0
60	0.0540541	0.405405	0.0810811	0.0540541	0.378378	8165.18	0.0433705	2.57061	0.0594539	0.0720477	10.5338	11.3634	0
60	0.628571	0.342857	0	0	0.0285714	8153.09	0.0484355	2.95112	0.128178	0.0134949	10.3136	11.19	0
60	0	0.428571	0.114286	0.0857143	0.342857	8166.97	0.0610479	2.54239	0.0554578	0.177747	10.6659	11.4861	0
60	0	0.117647	0.441176	0	0	8183.03	0.146228	2.49338	0.0159844	0.168168	10.4739	11.2898	0
60	0	0	1	0	0	8251.34	0.422615	1.73617	0	1.34368	3.78019	8.95674	0
61	0	0.28125	0.4375	0.0625	0	8287.12	0.0694322	3.11697	0.0198423	0.369481	13.6804	15.0751	0
61	0	0	1	0	0	8278.03	0.122685	3.11029	0	0.487985	13.2804	14.749	0
61	0	0	1	0	0	8286.89	0.122545	3.14599	0	0.517853	13.3172	14.8364	0
61	0	0	0.428571	0.485714	0	8260.26	0.0545957	2.97262	0.0292717	0.533994	13.1813	14.6405	0
61	0	0	0.6875	0.3125	0	8264.29	0.0643873	3.01296	0.0110768	0.546839	13.2035	14.6894	0
62	0	0	0.852941	0.147059	0	8141.57	0.45261	3.30772	0.00367647	0.49627	6.86336	8.02691	0
62	0	0	0.4	0.6	0	8164.24	0.0417458	2.79071	0.0206801	0.810322	6.26318	7.30872	0
62	0	0	0.0555556	0.916667	0	8162.57	0.0606892	2.95215	0.0456496	0.692479	6.26582	7.33591	0
62	0	0.0571429	0.657143	0.228571	0	8181.09	0.0330234	2.26256	0.00958158	1.46907	6.29811	7.19403	0
62	0	0	0.638889	0.138889	0	8185.37	0.017612	2.18275	0.00723209	1.29679	6.94678	7.90608	0
62	0	0	0.142857	0.857143	0	8185.81	0.0807	2.24045	0.0575936	1.45015	6.48171	7.38119	0
62	0	0	0.21875	0.78125	0	8185.17	0.115565	2.26353	0.0439811	1.40823	6.44995	7.35947	0
62	0	0	0.114286	0.857143	0	8188.57	0.0775536	2.09232	0.0464905	1.65555	6.52961	7.38276	0
62	0	0	0	1	0	8188.83	0.0571931	2.10983	0.0742549	1.62346	6.55038	7.41052	0
62	0	0	0.485714	0.485714	0	8191	0.0972151	2.07926	0.014459	1.5796	6.8226	7.70566	0
62	0	0	0.485714	0.457143	0	8191.16	0.108903	2.07941	0.0147518	1.57386	6.84339	7.72802	0
64	1	0	0	0	0	7919.6	0.0608676	4.75816	0.133913	0	2.31313	4.13627	0
64	1	0	0	0	0	7926.37	0.181877	2.04152	0.23773	0	0.556836	1.07806	1.05306
64	0	0	0.6	0.4	0	7939.94	0.0206043	4.38862	0.0123809	0.309038	2.13995	4.04942	0
64	0	0	0.567568	0.432432	0	7947.83	0.0972228	4.35016	0.0137447	0.319907	2.01252	3.91324	0
64	0	0	0.971429	0.0285714	0	7952.6	0.0833246	3.99459	0	0.608414	2.25042	4.18651	0
64	0	0	1	0	0	7921.09	0.042348	3.83084	0	0.606335	2.92754	4.86262	0
64	0	0	0.911765	0.0882353	0	7957.88	0.214312	4.04096	0.00142857	0.539903	2.00295	3.93215	0
64	0	0	0.945946	0.0540541	0	7976.94	0.0817435	2.47049	0.0015625	1.37952	4.29421	4.23919	0
64	0	0	0.882353	0.117647	0	7988.89	0.48392	3.70184	0.003125	0.818527	1.82598	3.76665	0
64	0	0	1	0	0	7980.39	0.381619	3.57683	0	0.874987	1.98667	3.92802	0
64	0.257143	0.2	0.142857	0.4	0	7918.33	0.0142752	4.8421	0.057395	0.0339415	2.45361	4.31504	0
65	0	0	1	0	0	8100.91	0.250576	1.35102	0	1.91399	1.98556	2.09358	0
65	0	0	1	0	0	8089.63	0.232351	1.41626	0	1.68001	2.14199	2.2236	0
65	0	0	1	0	0	8090.26	0.312909	1.41518	0	1.73413	2.07213	2.1491	0
65	0	0	0.314286	0.685714	0	8069.61	0.030388	1.24172	0.044841	1.70931	1.89753	1.87886	0
66	0	0.378378	0.243243	0.135135	0.189189	8125.83	0.104468	3.48881	0.0489358	0.221673	7.12561	8.35311	0
66	0	0	0.4	0.6	0	8163.78	0.0412742	2.7996	0.0199556	0.805676	6.25967	7.30583	0
66	0	0	0.942857	0.0571429	0	8127.68	0.124393	3.74191	0	0.142481	5.97196	7.23112	0
66	0	0	0.84375	0.15625	0	8128.53	0.149084	3.63994	0.003125	0.187457	5.93955	7.18307	0
66	0	0	1	0	0	8112.12	0.0145757	3.58888	0	0.265251	5.87436	7.27586	0
66	0	0	1	0	0	8125.88	0.308489	3.98383	0	0.303117	6.60503	7.86139	0
66	0	0	0.771429	0.0857143	0	8122.74	0.0383178	3.82111	0.00642857	0.151335	6.01457	7.31022	0
66	0	0	1	0	0	8128.33	0.0811419	2.75589	0	0.818329	5.47944	6.62901	0
66	0.333333	0.0833333	0.138889	0	0.305556	8103.44	0.0105987	3.91563	0.0385505	0.0252581	6.23761	7.59078	0
66	0.0285714	0	0.542857	0.428571	0	8104.43	0.053209	3.63155	0.0207873	0.066456	6.22829	7.64894	0
66	0	0	1	0	0	8136.76	0.241094	3.50477	0	0.268115	6.6628	7.8666	0
66	0.0882353	0.235294	0.205882	0.411765	0	8114.51	0.0374778	3.69306	0.0285494	0.0439715	8.16602	9.31551	0
67	1	0	0	0	0	7880.51	0.100457	4.63394	0.291672	0	1.10369	6.95508	0.0859069
67	1	0	0	0	0	7879.12	0.121943	4.56269	0.34761	0	1.04022	7.01403	0.0859069
67	1	0	0	0	0	7877.83	0.0901631	4.55473	0.401697	0	0.991527	7.05731	0.0859069
67	0	0.0571429	0.942857	0	0	7949.29	0.0144642	2.479	0.00142857	0.948193	0.848075	8.3549	0.0859069
67	0	0.314286	0.685714	0	0	7964.78	0.166746	2.6883	0.00759638	0.666601	1.09173	7.87619	0.0859069
67	0	0	0.885714	0.114286	0	8043.97	0.0442508	1.41608	0.00142857	2.68456	3.29403	7.54226	0
67	0	0	0.885714	0.114286	0	8094.58	0.415857	1.30287	0.00147059	2.77329	3.78525	7.00522	0
67	0	0	1	0	0	8092	0.0430556	1.80552	0	2.76097	2.84007	8.1545	0
67	1	0	0	0	0	7877.91	0.101723	4.5519	0.395543	0	0.996532	7.05301	0.0859069
67	1	0	0	0	0	7878.31	0.113419	4.54788	0.379297	0	1.01176	7.0391	0.0859069
68	0.285714	0.371429	0.0571429	0	0.0285714	7834.84	0.0184489	1.55803	0.061674	0.0213568	2.3159	11.1379	0
68	0.305556	0.5	0.0277778	0	0.0555556	7834.12	0.0219327	1.53924	0.0804248	0.0204759	2.34714	11.1737	0
68	0.138889	0.416667	0.111111	0	0	7836.43	0.0182241	1.57667	0.0432652	0.027182	2.28127	11.0977	0
68	0.285714	0.285714	0	0	0	7839.67	0.025975	1.63528	0.0839056	0.0294126	2.18711	10.9723	0
68	1	0	0	0	0	7872.86	0.0532432	3.4895	0.260279	0	2.25976	8.48508	0
68	0.162162	0.216216	0.0810811	0	0.0810811	7849.94	0.0212508	1.86387	0.0487109	0.035836	1.94883	10.4451	0
68	0.257143	0.0285714	0.142857	0	0	7851	0.0285494	2.14998	0.0573585	0.0307931	1.71519	10.0989	0.00133899
68	0.257143	0.0285714	0.2	0	0	7851.69	0.0341384	2.115	0.0560711	0.02908	1.71747	10.1234	0.00121264
68	0	0	0.941176	0.0588235	0	7906.03	0.0780178	2.77568	0.00138889	0.507437	0.53835	8.64042	0.153291
68	0	0	0.628571	0.371429	0	8521.46	0.546497	1.84689	0.0105917	0.641072	1.23935	10.2481	0.0673845
68	0	0	0.571429	0.428571	0	8346.53	0.545709	1.86747	0.00810811	0.649969	1.11873	10.0618	0.0673845
68	0.0277778	0	0.972222	0	0	7855.62	0.0846186	3.61209	0.00078125	0.0821637	0.964639	8.81485	0.0673845
70	0	0	1	0	0	8103.32	0.574999	2.49516	0	0.555035	1.73661	2.7817	0.00198425
70	0.941176	0	0	0	0.0294118	8012.71	0.0232865	3.24184	0.140456	0.00147059	1.05594	3.03497	0.119499
70	0.864865	0	0	0	0.135135	8013.11	0.0366505	3.04024	0.197058	0.00337838	0.932268	2.63922	0.176126
70	0.714286	0	0	0.0571429	0.228571	8013.79	0.030526	2.9869	0.102717	0.00785714	1.05619	2.60688	0.176802
70	0.65625	0	0	0	0.34375	8014.66	0.0351378	2.76428	0.192002	0.00859375	0.918521	2.2308	0.247962
71	1	0	0	0	0	8479	0.0662138	2.09209	0.117961	0	0.569833	1.4354	0.677631
71	0	0.314286	0.2	0.0857143	0.342857	8579.5	0.0426595	1.43312	0.0345285	0.218874	0.037612	0.173225	0.825911
71	0	0.235294	0.441176	0	0.323529	8587.63	0.028873	1.35031	0.022612	0.0909007	0.0896416	0.423535	0.783279
71	0	0.242424	0.181818	0	0.272727	8546.97	0.0528044	1.53099	0.0434444	0.170015	0.182155	0.477572	0.864979
71	0	0.0857143	0.485714	0.114286	0.314286	8573.4	0.0533844	1.50045	0.0195171	0.325393	0.0367224	0.241745	0.845617
71	0	0	1	0	0	8604.16	0.542088	1.7511	0	0.380128	0.0521429	0.347838	0.834125
71	0	0	1	0	0	8595.66	0.636242	1.96933	0	0.594146	0.0548611	0.480665	0.871127
71	0	0	1	0	0	8599.09	0.353731	1.69875	0	0.479121	0.0875	0.332616	0.877578
71	0	0	0.90625	0.09375	0	8601.97	0.511962	1.77657	0.00138889	0.532099	0.052027	0.33628	0.857822
72	0.5	0	0.388889	0.111111	0	8439.92	0.0526001	1.66265	0.0347026	0.0226132	1.71554	11.9783	0.00088116
72	1	0	0	0	0	8428.63	0.0732046	1.63318	0.124269	0	1.77042	11.8848	0
72	0.702703	0.297297	0	0	0	8414.03	0.0367224	1.70473	0.121867	0.0104586	2.16541	12.1098	0
72	0.0285714	0.2	0.571429	0.2	0	8584.4	0.195994	2.29938	0.015	0.0815505	3.35088	12.9064	0
72	0.0588235	0	0.764706	0.176471	0	8539.37	0.380921	2.21005	0.00731617	0.0728691	3.25365	12.9466	0
72	0.135135	0.297297	0.27027	0.189189	0.108108	8442.69	0.0757752	1.95196	0.0365017	0.04772	2.40631	12.4854	0
72	0.0571429	0.857143	0	0.0857143	0	8495.61	0.424975	1.82801	0.0776154	0.0592974	2.737	12.4044	0
72	0	0.0294118	0.852941	0.117647	0	8645.59	0.0547785	2.39542	0.00559173	0.14671	4.08722	12.3151	0
72	0	0.297297	0.351351	0.351351	0	8488.75	0.256206	1.84705	0.0233728	0.111928	3.025	12.4766	0
73	0.114286	0.0857143	0.685714	0.114286	0	8534.26	0.417704	2.1849	0.00689721	0.0510849	3.24645	12.9017	0
73	0.117647	0.0882353	0.617647	0.117647	0	8644.79	0.0738949	2.26879	0.0142661	0.0499862	3.94894	12.3707	0
73	0	0	0.777778	0.222222	0	8501.73	0.200309	2.25249	0.00579235	0.0979871	2.79863	12.2075	0
73	0	0.0833333	0.666667	0.194444	0	8517.41	0.0498547	3.73921	0.0102959	0.125537	1.68019	12.1404	0.0137275
73	0	0	0.885714	0.114286	0	8576.06	0.168859	2.19425	0.00220588	0.142457	3.21336	12.9035	0
73	0	0	0.885714	0.114286	0	8562.76	0.249831	2.36658	0.0015625	0.338505	2.93872	12.7351	0
74	0.513514	0.0540541	0.216216	0.216216	0	8404.67	0.0340895	2.35923	0.0486118	0.0193295	1.4214	9.31477	0.0322035
74	0.0588235	0.0294118	0.764706	0.147059	0	8410.2	0.0691999	2.18622	0.00702031	0.0769551	1.23079	9.52607	0.0369004
74	0.285714	0.0285714	0.514286	0.171429	0	8405.97	0.0264819	2.24937	0.016694	0.0366231	1.31314	9.42993	0.0369004
74	0.314286	0.0285714	0.514286	0.142857	0	8406.43	0.0261821	2.24514	0.0178014	0.0323299	1.29567	9.45884	0.0369004
74	0	0	1	0	0	8419.56	0.327494	1.82872	0	0.350835	1.02855	9.65078	0.0369004
74	0	0	1	0	0	8417.91	0.178145	2.03688	0	0.19688	1.115	9.60855	0.0369004
74	0.657143	0.0857143	0.0285714	0.228571	0	8406.34	0.0291165	2.17555	0.0696423	0.0124036	1.31229	9.76587	0.033227
74	1	0	0	0	0	8398.86	0.115793	2.53718	0.166972	0	1.45597	9.35306	0.025771
74	0.363636	0.0909091	0.30303	0.242424	0	8406.83	0.031594	2.26282	0.0316092	0.0335322	1.29171	9.48986	0.0369004
74	1	0	0	0	0	8385	0.212873	3.2123	0.368082	0	1.71754	9.11945	0.000372078
74	0	0	1	0	0	8406.23	0.281907	1.50119	0	0.813266	0.49631	10.3996	0.0369004
75	1	0	0	0	0	8307.75	0.0557523	3.03405	0.306129	0	3.06327	10.573	0
75	0.393939	0.333333	0	0.0909091	0.121212	8299.78	0.0505953	2.84052	0.122839	0.0208172	3.87337	10.7422	0
75	1	0	0	0	0	8304.66	0.0574394	2.43636	0.426869	0	3.19995	10.13	0
75	0.628571	0.114286	0	0	0.2	8299.03	0.0214658	2.88229	0.136648	0.0101733	3.82067	10.7846	0
75	0	0.176471	0.529412	0.235294	0	8307	0.0231805	2.455	0.0227273	0.102453	4.26873	10.8036	0
75	0.5	0.0555556	0	0	0.416667	8297.97	0.0346224	2.83167	0.2342	0.0130753	3.64958	10.5791	0
75	1	0	0	0	0	8307.09	0.106206	2.92396	0.158103	0	3.13374	10.4457	0
75	0	0	0.914286	0.0857143	0	8393.06	0.315541	1.4509	0.00135135	0.265675	3.38725	8.80615	0
75	0	0	0.8125	0.1875	0	8340.56	0.101272	2.49524	0.00810811	0.142535	4.0776	10.6032	0
76	0.0857143	0	0.8	0.114286	0	8219.69	0.0685122	1.84703	0.00277778	0.0693978	1.33861	7.18666	0.0611439
78	0.828571	0.0285714	0	0.142857	0	7898	0.0506024	4.10219	0.085514	0.00487745	0.861034	4.48259	0.279818
78	0.714286	0	0	0	0.285714	7923.89	0.0394477	5.1083	0.114363	0.00714286	3.26564	4.02065	0
78	1	0	0	0	0	7912.42	0.0303068	4.40175	0.388314	0	3.52125	3.92009	0
78	0.945946	0	0	0	0.0540541	7921.94	0.0255613	4.75577	0.274422	0.00135135	3.28119	3.86959	0
78	0.4375	0.03125	0.3125	0.0625	0.0625	7896.08	0.0173162	3.81238	0.0258986	0.0204133	0.925208	3.77919	0.357549
79	0.5	0.25	0	0	0.1875	7894.54	0.0241385	4.49615	0.180895	0.0142521	1.28062	4.26333	0.187851
79	1	0	0	0	0	7882.03	0.0258876	5.17689	0.175881	0	2.09344	5.86442	0
79	0.857143	0.0285714	0	0.0285714	0	7881.38	0.0181003	4.94047	0.131342	0.00357143	2.23403	5.83217	0
79	0.837838	0.0540541	0	0.108108	0	7884.91	0.104554	5.25781	0.111712	0.00405405	1.83595	5.73677	0
79	1	0	0	0	0	7891.58	0.118243	5.36556	0.207111	0	1.62697	5.89574	0.00816406
79	0.944444	0	0	0	0.0555556	7922	0.0236635	4.79244	0.260974	0.00138889	3.27537	3.87983	0
80	0	0	1	0	0	7935.63	0.15866	4.04885	0	0.209524	1.76323	6.54754	0
80	0	0	1	0	0	7924.26	0.0834475	4.11404	0	0.339294	0.407133	4.88228	0.298452
80	1	0	0	0	0	7895.46	0.0460888	5.25443	0.185321	0	1.62094	6.00348	0.00836284
80	1	0	0	0	0	7916.46	0.034375	3.7116	0.223833	0	1.25922	5.97772	0.0468881
80	1	0	0	0	0	7910.74	0.016306	4.21361	0.143889	0	1.37568	6.16778	0.034875
80	0.942857	0	0	0.0571429	0	7912.97	0.0218291	3.91818	0.168595	0.00142857	1.3238	6.08712	0.0401127
80	0.0833333	0.138889	0.583333	0.194444	0	7922	0.0826567	3.68844	0.014082	0.0632726	1.5224	6.25317	0.0172664
81	0.914286	0	0	0	0	8069.06	0.0180765	3.3548	0.162273	0.00214286	2.99336	1.54438	0.112809
81	1	0	0	0	0	8059.66	0.0311437	4.5591	0.140365	0	2.0787	0.959375	0.225618
81	1	0	0	0	0	8064.53	0.0238166	3.81834	0.277351	0	2.6971	1.25225	0.112809
81	0.378378	0.108108	0.513514	0	0	8065.2	0.024638	3.27422	0.0177419	0.0296073	3.05807	1.61391	0.106542
81	0.25	0.0625	0.625	0.0625	0	8068.17	0.0380489	3.27753	0.013646	0.0435154	3.13945	1.69146	0.0515698
81	0.971429	0.0285714	0	0	0	8066.09	0.0208876	3.30884	0.102185	0.000714286	2.93504	1.49283	0.112809
81	0.588235	0.147059	0.0294118	0.117647	0	8067.38	0.0668182	3.43795	0.100536	0.0116385	2.8219	1.38947	0.112809
81	0	0	0.555556	0.388889	0	8088.74	0.112695	3.15458	0.0116019	0.124612	2.94666	1.53533	0.112809
81	1	0	0	0	0	8064.63	0.0239181	3.77513	0.272109	0	2.7153	1.27052	0.112809
81	0.828571	0.0571429	0	0	0	8064.91	0.0323092	3.64119	0.184386	0.00428571	2.75624	1.31791	0.112809
81	0.8125	0.15625	0.03125	0	0	8066.61	0.0225418	3.28868	0.0796205	0.0050111	2.96208	1.5207	0.112809
81	0.4	0.142857	0.2	0.257143	0	8071.03	0.0608679	3.27779	0.0450284	0.0236636	2.90656	1.47647	0.112809
82	0	0.15625	0	0	0	8139.66	0.0631737	2.6824	0.120436	0.621995	1.87941	4.70669	0
82	0	0.171429	0	0	0	8135.03	0.140877	2.91585	0.229339	0.677172	1.61744	5.25632	0.0105443
82	0	0.0571429	0	0	0	8137.46	0.0672754	2.80573	0.142272	0.7473	1.52705	5.16049	0.0233159
82	0	0	0.0857143	0	0	8141.76	0.0276073	2.68638	0.0769733	0.783759	1.50273	5.00762	0.0253021
82	0	0	0.0833333	0	0	8142.11	0.0188673	2.69269	0.0768381	0.755346	1.53466	4.9969	0.0208165
82	0	0	0	0	0	8123	0.0371827	2.81286	0.141449	0.451285	2.51656	4.84748	0
82	0	0.027027	0	0.108108	0	8142.2	0.0235817	2.63466	0.0855915	1.08395	1.19309	5.12869	0.0691257
82	0	0.0571429	0.542857	0.371429	0	8144.49	0.0426007	2.21048	0.0170664	1.05806	2.05513	4.18108	0
82	0	0.0285714	0.457143	0	0	8149.16	0.0360984	2.51058	0.0282066	0.984125	1.35358	4.85409	0.0428307
82	0	0.0625	0.28125	0.0625	0	8143.62	0.0310496	2.61076	0.0400522	0.867829	1.44116	4.93175	0.0327788
83	0.916667	0.0277778	0	0	0	8156.43	0.087372	2.18176	0.467256	0.00208333	2.76756	8.60389	0
83	0.567568	0.189189	0.189189	0	0	8166.82	0.0954843	3.00943	0.0429136	0.0110907	2.0472	9.49637	0
83	0.485714	0.4	0	0	0.114286	8179.97	0.0289161	2.87051	0.0862729	0.0150461	2.46817	9.56906	0
83	1	0	0	0	0	8175.46	0.0768863	3.07481	0.193626	0	2.30387	9.6364	0
83	0	0.314286	0.571429	0	0.114286	8193.49	0.086714	2.72565	0.0110768	0.0937578	2.60197	9.52548	0
83	0	0	1	0	0	8194.2	0.209581	2.51402	0	0.209323	2.78084	9.43812	0
83	0.583333	0.305556	0	0	0.0555556	8175.91	0.054332	2.80192	0.127301	0.010992	2.47424	9.50023	0
83	0.428571	0.228571	0	0	0.0857143	8174.89	0.031851	2.67944	0.0903458	0.0192553	2.5747	9.40022	0
83	0	0.333333	0.416667	0.0277778	0.166667	8187.11	0.0649329	2.68719	0.0214442	0.0747622	2.62143	9.46451	0
84	0.205882	0.0588235	0.705882	0	0.0294118	8202.97	0.0530511	2.37427	0.00891336	0.0481585	0.459523	0.906351	1.01969
84	0	0	1	0	0	8251.53	0.407799	1.86427	0	0.42491	0.140172	0.996076	1.29976
84	0.28125	0.15625	0.15625	0.21875	0.1875	8216.26	0.0121889	2.37286	0.0382988	0.0371667	0.440172	1.28181	0.913465
84	0	0	0.971429	0.0285714	0	8210.31	0.112894	2.72507	0	0.0945641	0.489286	0.812943	1.24862
84	0	0.0588235	0.470588	0.470588	0	8208.5	0.171102	2.65119	0.0175388	0.104692	0.596877	0.80342	1.02412
84	0	0.0857143	0.714286	0.2	0	8208.33	0.225839	2.70985	0.00866786	0.129573	0.561532	0.720678	1.04264
84	0.0277778	0.583333	0.277778	0	0.0555556	8196.26	0.0784912	2.31724	0.045005	0.0756449	0.540441	1.16719	1.49555
84	0	0.228571	0.428571	0.2	0	8201.94	0.264513	2.19943	0.0186222	0.232586	0.417293	1.20725	1.46469
84	0.027027	0.432432	0.324324	0	0.108108	8198.4	0.119837	2.30661	0.0424242	0.0901836	0.514286	1.19392	1.48533
85	0.571429	0.114286	0.228571	0	0	8103.27	0.153114	3.11255	0.0326851	0.0161023	2.04769	1.00062	0.112809
85	0.875	0	0	0	0.125	8093.74	0.0200461	3.08366	0.245957	0.003125	2.15776	1.97515	0
85	0.702703	0.135135	0.0810811	0	0.027027	8098.6	0.091517	3.0373	0.0554375	0.0103382	2.19179	1.77499	0
85	0	0	1	0	0	8108.91	0.302694	2.89374	0	0.175778	2.3914	1.71127	0.0410214
85	0	0	0.75	0.25	0	8343.11	0.125378	1.71798	0.00428571	0.202341	3.51391	7.28008	0
85	0	0	1	0	0	8124.92	0.543685	2.04886	0	0.271326	3.02185	2.0459	0
85	0.305556	0.138889	0.25	0.305556	0	8108.84	0.0979956	1.5275	0.0303002	0.0366892	3.05617	1.6955	0.0515698
86	0	0.117647	0.382353	0	0	8149.24	0.0302608	2.77977	0.0305109	1.19055	1.00393	5.35707	0.107257
86	0	0.0571429	0	0	0	8132.97	0.0984259	2.97613	0.145066	1.00725	1.14824	5.55702	0.0995527
86	0	0.0571429	0	0	0	8128.21	0.145045	2.96251	0.206288	1.04512	1.20092	5.53641	0.0887004
86	0	0	0.647059	0.235294	0	8143.6	0.0333291	2.61185	0.0102959	1.01569	0.558644	5.5314	0.181491
86	0	0	0	0	0	8125.94	0.0829839	2.95371	0.338362	1.05323	1.35082	5.51044	0.0595819
86	0	0	0.0571429	0	0	8140.94	0.0232771	2.91085	0.074464	1.04084	1.044	5.50507	0.112711
86	0	0	0.75	0.111111	0	8139.31	0.207967	2.87671	0.0101733	0.802457	0.784882	5.78906	0.205712
86	0	0	0.764706	0.0588235	0	8162.49	0.0280348	2.42387	0.00702031	0.657724	0.460916	5.90786	0.274423
86	0	0	0.84375	0.125	0	8150.5	0.0607245	2.42682	0.00428571	1.35393	0.717937	5.20374	0.131514
87	0	0	1	0	0	8358.35	0.560435	1.21402	0	2.11752	0.309026	1.97379	1.20249
87	0	0	1	0	0	8358.31	0.559975	1.21371	0	2.14283	0.298984	2.00186	1.22528
87	0	0	1	0	0	8347.2	0.345244	1.26589	0	2.01324	0.577556	1.99724	1.02266
87	0	0	1	0	0	8347.67	0.351452	1.25761	0	2.007	0.569215	1.98317	1.02067
88	0.625	0.125	0.25	0	0	8144.21	0.0223272	1.82542	0.0420093	0.0144869	0.360962	0.392772	0.715331
88	0.1875	0.1875	0.25	0.34375	0	8145.39	0.0243997	2.31359	0.0336105	0.0398746	0.447137	0.681575	0.63764
88	0.53125	0.1875	0.125	0.09375	0	8146.37	0.0224848	2.38549	0.0477165	0.0131472	0.536267	0.778385	0.602569
88	0.138889	0.111111	0.583333	0.166667	0	8162.09	0.324456	2.57251	0.0105917	0.0417589	0.743272	0.839527	0.517022
88	0	0	0.657143	0.342857	0	8238.77	1.06507	0.475676	0.00702031	1.40006	0.108908	1.1835	1.59034
88	0	0	1	0	0	8238.66	0.822969	0.58099	0	1.4067	0.122324	1.03454	1.48459
88	0.171429	0.0857143	0.114286	0.628571	0	8145.91	0.1032	2.51965	0.0424903	0.0425731	0.785599	1.00841	0.507532
88	0	0	0.771429	0.228571	0	8170.89	0.260565	1.57562	0.00601015	0.251007	0.035	0.368338	0.959956
88	0.428571	0.228571	0.228571	0.114286	0	8148.43	0.363322	2.88197	0.0383778	0.0242581	0.926423	1.08815	0.410013
88	0.971429	0	0	0	0	8140.09	0.0619378	1.99577	0.138729	0.000714286	0.465996	0.555136	0.655139
88	0	0	0.625	0.375	0	8169.8	0.233124	1.60423	0.0126073	0.221679	0.0370693	0.373481	0.928978
89	0.694444	0	0.277778	0.0277778	0	8169.76	0.0265796	3.18873	0.0334354	0.010913	0.0697236	0.517812	1.66522
89	0.411765	0	0.441176	0.147059	0	8166.74	0.01666	3.27527	0.0199582	0.0296523	0.174147	0.487295	1.58273
89	0	0	0.777778	0.222222	0	8232.03	0.125086	3.27701	0.00571429	0.178673	0.117623	1.02084	1.16578
89	1	0	0	0	0	8171.14	0.0344327	3.55014	0.172009	0	0.493518	0.894409	1.39205
89	0	0	1	0	0	8314.2	0.288252	2.62887	0	0.442537	0.532099	1.24524	1.15624
89	1	0	0	0	0	8172.91	0.0238115	3.5538	0.16175	0	0.509044	0.951737	1.34698
90	0	0	1	0	0	8205.64	0.0471238	2.87982	0	0.649521	0.120884	0.248542	1.33898
90	1	0	0	0	0	8117.26	0.0750284	3.40658	0.603018	0	3.63073	4.28433	0
90	0.529412	0.117647	0.264706	0.0882353	0	8168.43	0.197244	3.41076	0.0418826	0.0177419	0.544497	0.693757	1.20936
90	0.885714	0.0571429	0.0571429	0	0	8171.6	0.228593	3.38215	0.0685498	0.00285714	0.408797	0.593564	1.17591
90	0.971429	0.0285714	0	0	0	8172.53	0.241482	3.33171	0.177547	0.000714286	0.421937	0.656222	1.11321
90	0.428571	0.0857143	0.457143	0.0285714	0	8162.81	0.0334229	3.3929	0.0260399	0.0269466	0.72236	0.86993	1.39487
91	0.942857	0	0	0	0.0571429	7924.21	0.053937	1.74921	0.11217	0.00142857	0.3079	1.37915	1.73795
91	0.25	0.0625	0.5625	0.125	0	7953.34	0.0365373	1.63799	0.0247273	0.0406227	0.126814	1.05791	2.95263
91	0	0	0.971429	0.0285714	0	7983.31	0.123199	1.54069	0.000714286	0.114399	0.0607143	0.946611	3.6685
91	0.324324	0.0540541	0.513514	0.108108	0	7945.54	0.0389765	1.78105	0.0229254	0.0390126	0.10365	1.30982	2.68141
91	0	0	1	0	0	7981.54	0.106398	1.55744	0.00142857	0.100563	0.0371429	0.953279	3.50761
91	0	0	1	0	0	8028.54	0.808822	1.15541	0	0.940709	0.112208	0.312746	5.48393
91	0	0	1	0	0	8008.74	0.617463	1.35948	0	0.615315	0.420566	0.469701	5.61307
91	0	0	1	0	0	8025.32	0.778332	1.29162	0	0.779164	0.34392	0.374735	5.82609
91	0	0	0.90625	0.09375	0	7958.76	0.295579	2.06882	0.00227273	0.33878	0.40196	1.5827	1.20332
91	0	0.0285714	0.857143	0.114286	0	7959.69	0.0733774	1.72617	0.00629479	0.0894225	0.183386	1.09173	2.70388
91	0.777778	0.138889	0	0.0833333	0	7934.12	0.0953949	1.86684	0.135862	0.0058432	0.0413432	1.31416	2.01786
91	0	0	1	0	0	7975.75	0.278305	1.73306	0	0.269322	0.0391313	0.930306	3.19597
91	0	0	1	0	0	7974.29	0.153504	1.62418	0	0.155737	0.0491727	0.960145	3.27506
92	0.228571	0.6	0	0.0285714	0.0857143	8035.56	0.030373	3.41076	0.0817735	0.029082	3.02737	4.02025	0
93	0	0	1	0	0	8269.78	0.186322	1.17733	0	1.09505	3.68994	4.35711	0
93	0	0.0571429	0.914286	0.0285714	0	8265.22	0.161322	1.73	0.00135135	0.107428	2.56512	4.23029	0
93	0.243243	0.0810811	0.621622	0.0540541	0	8260.69	0.10121	1.54899	0.0160976	0.0437428	2.61685	4.25733	0
93	0.235294	0	0.764706	0	0	8209.4	0.188642	2.23142	0.00208333	0.0510544	2.55012	4.18207	0
93	0	0	1	0	0	8227.68	0.121079	1.20888	0	1.44044	3.75158	4.42464	0
93	0	0	1	0	0	8230.31	0.132731	1.20068	0	1.43176	3.73952	4.41259	0
93	0	0	1	0	0	8227.14	0.121079	1.21004	0	1.44164	3.75158	4.42464	0
95	0	0	1	0	0	8410.32	0.345074	3.18007	0	0.232893	4.01433	7.85137	0
95	1	0	0	0	0	8266.83	0.0285106	3.44254	0.385156	0	3.45564	7.29714	0
95	1	0	0	0	0	8244.33	0.0321077	3.42596	0.181039	0	3.43981	7.25755	0
95	1	0	0	0	0	8273.94	0.0234949	3.29473	0.306642	0	3.61548	7.45361	0
95	0.432432	0.027027	0.135135	0.135135	0.27027	8305.11	0.0456337	3.20951	0.0600133	0.021197	3.97771	7.81841	0
95	0.676471	0.0588235	0	0	0.264706	8285.26	0.0276183	3.1194	0.127977	0.00943267	3.88126	7.72039	0
95	0.15625	0.0625	0.46875	0.3125	0	8297.29	0.0214534	1.85079	0.0168993	0.0354218	5.25798	9.07644	0
95	0	0	1	0	0	8425.11	0.183735	2.43992	0	0.263044	5.04585	8.87465	0
95	0.111111	0.0833333	0.416667	0.388889	0	8292.44	0.0296118	1.84207	0.0170994	0.0417725	5.24461	9.05923	0
96	0	0	0.914286	0.0857143	0	8196.78	0.0463382	1.48507	0.00202703	2.4803	4.08233	4.14012	0
96	0	0.0294118	0.617647	0.147059	0	8122.66	0.105389	3.97492	0.0131472	0.0983034	6.34645	7.60707	0
96	0	0	1	0	0	8123.26	0.037623	3.74128	0	0.214725	5.88819	7.18556	0
96	0.117647	0.382353	0.0588235	0.264706	0.0294118	8116.59	0.0785134	3.95524	0.0677184	0.0434488	6.3019	7.58671	0
97	0.5625	0	0.375	0.0625	0	8085.74	0.123018	2.33292	0.0288998	0.0183427	1.49021	3.2114	0.0234739
97	0.571429	0	0.4	0.0285714	0	8085.53	0.114501	2.31196	0.022625	0.0189134	1.45624	3.17815	0.0274667
97	0.777778	0.0555556	0.0277778	0.138889	0	8086.94	0.166116	2.41327	0.0828829	0.00694444	1.6125	3.332	0.00881821
97	0.3125	0	0.65625	0.03125	0	8099.66	0.0301038	2.22159	0.0106378	0.0375083	2.01291	3.66767	0
97	0	0.342857	0.0571429	0.0571429	0	8061.83	0.0223077	3.19924	0.0466566	0.435103	1.97847	3.78054	0
99	0.166667	0	0.694444	0.0833333	0	8092.26	0.208265	1.98279	0.00815301	0.0486428	2.32285	3.85041	0
99	0.176471	0	0.764706	0.0588235	0	8095.74	0.154658	1.95352	0.00630602	0.0469642	2.5103	3.99839	0
99	0	0	1	0	0	8104.14	0.29771	2.75792	0	0.239825	2.15711	3.93867	0
99	0	0.571429	0.0857143	0	0	8064.22	0.0517664	2.87134	0.04455	0.202983	2.13843	3.94705	0
99	0	0.342857	0.0571429	0.0571429	0	8061.83	0.0223077	3.19924	0.0466566	0.435103	1.97847	3.78054	0
101	0.571429	0.4	0.0285714	0	0	8242.75	0.0417271	1.90746	0.0914538	0.0145051	0.0585267	0.732063	3.44047
101	0.861111	0.138889	0	0	0	8248.88	0.0274544	1.79822	0.262373	0.00375987	0.0371244	1.60309	0.950348
101	0.441176	0.205882	0.205882	0.0882353	0	8289.76	0.0293306	2.13758	0.0478233	0.0288577	0.900596	1.42412	0.896153
101	0.428571	0.142857	0.171429	0.228571	0	8291.21	0.0328833	2.16273	0.0391297	0.0284977	0.843942	1.35358	0.917357
101	0.2	0.257143	0.4	0.114286	0	8292.69	0.0323191	2.09631	0.0316649	0.0495728	0.900481	1.51128	0.919716
101	0.771429	0	0.228571	0	0	8273.12	0.178601	1.94789	0.0533939	0.00790321	0.876636	1.37348	0.875087
102	0.942857	0	0	0	0	8064.71	0.0183677	4.19555	0.206598	0.00142857	2.39103	0.987079	0.112809
102	1	0	0	0	0	8066.3	0.0249594	4.35223	0.235881	0	2.35331	0.921795	0.112809
102	0	0	0.794118	0.205882	0	8074.65	0.0300615	3.07848	0.00689721	0.4882	3.59723	2.15305	0
102	0.114286	0.171429	0.428571	0.228571	0.0571429	8080.21	0.0895969	3.29908	0.0248357	0.0652884	3.24127	1.79239	0
103	0	0	0.4	0.6	0	8166.86	0.0856045	1.02652	0.0189396	0.759503	3.31353	6.35839	0
104	0.837838	0.0540541	0	0.108108	0	8138.49	0.063051	3.68858	0.0988285	0.0046138	0.866884	1.37856	0.299219
104	0.0285714	0.142857	0.8	0.0285714	0	8232.76	0.0261531	1.55814	0.00390625	0.0486227	2.89046	4.49844	0
104	0	0	1	0	0	8389.65	0.326326	2.69047	0	0.423535	3.96268	7.65542	0
105	0.529412	0.0294118	0.323529	0.117647	0	8140.77	0.030155	3.62815	0.0433223	0.022042	0.918219	1.45409	0.294442
105	0	0	0.970588	0.0294118	0	8149.43	0.0680916	3.37732	0.00142857	0.105181	0.835847	1.38461	0.308776
105	0	0.0540541	0.594595	0.351351	0	8131.17	0.131046	3.03958	0.0113988	0.0853756	1.22449	1.79461	0.097926
105	0.147059	0.0588235	0.647059	0.147059	0	8145	0.0324299	3.50361	0.0166819	0.0588834	0.85099	1.38873	0.304305
106	0.5	0.09375	0.25	0.15625	0	8229.91	0.0234559	1.8468	0.0390158	0.0183427	3.33774	4.4281	0
106	0	0	1	0	0	8178.16	0.387061	1.61842	0	0.395627	3.57779	5.28767	0
106	0.0571429	0.114286	0.428571	0.4	0	8170.06	0.22341	1.9615	0.0167752	0.0769704	3.12409	4.68081	0
106	0.25	0.111111	0.361111	0.277778	0	8141.49	0.281922	2.02405	0.0331089	0.0315043	2.87014	4.51765	0
107	0.837838	0.0540541	0	0.108108	0	8138.49	0.063051	3.68858	0.0988285	0.0046138	0.866884	1.37856	0.299219
107	0.529412	0.0294118	0.323529	0.117647	0	8140.77	0.030155	3.62815	0.0433223	0.022042	0.918219	1.45409	0.294442
107	0.885714	0.0285714	0.0285714	0.0571429	0	8135.03	0.0657287	3.70224	0.0859427	0.00285714	0.997184	1.53114	0.276803
107	0.805556	0.0277778	0.0555556	0.111111	0	8138.39	0.0585464	3.70839	0.087755	0.00613085	0.883052	1.39916	0.297381
107	0.914286	0	0.0285714	0.0571429	0	8134.5	0.0684692	3.70432	0.0924738	0.00214286	1.01193	1.54669	0.272961
107	0.147059	0.0588235	0.647059	0.147059	0	8145	0.0324299	3.50361	0.0166819	0.0588834	0.85099	1.38873	0.304305
108	0	0	0.6	0.4	0	8084.22	0.0710374	2.63678	0.0123261	0.782985	4.06229	2.61334	0
108	0.805556	0.194444	0	0	0	8071.47	0.0885071	3.35481	0.242223	0.00486111	3.08986	1.65443	0.0805778
108	0.342857	0	0.657143	0	0	8065.8	0.024669	3.27336	0.0127807	0.0314329	3.10161	1.65521	0.0805778
108	0.5	0.235294	0.0882353	0.176471	0	8070.16	0.0311835	3.24465	0.0462989	0.0201214	2.95933	1.52584	0.112809
109	0.942857	0	0	0	0	8064.71	0.0183677	4.19555	0.206598	0.00142857	2.39103	0.987079	0.112809
109	1	0	0	0	0	8069.82	0.0338857	4.37207	0.304376	0	2.36562	0.924443	0.112809
109	1	0	0	0	0	8072.41	0.0230765	3.75601	0.129016	0	2.61622	1.2325	0.112809
109	0.71875	0.15625	0.0625	0.0625	0	8078.47	0.0154911	3.54201	0.0743836	0.00845971	2.68038	1.30189	0.112809
111	0	0	0	0	0	8126.77	0.0903339	2.9385	0.314754	1.06364	1.32043	5.48721	0.0638699
111	0	0.0882353	0	0	0	8137.06	0.105298	2.94194	0.178641	0.596656	1.68933	5.22193	0.00251837
111	0	0.0571429	0	0	0	8131.63	0.220166	3.06451	0.283894	0.6517	1.70825	5.40688	0.00121541
111	0	0.0833333	0	0	0	8136.62	0.113742	2.93949	0.19447	0.615252	1.67017	5.22885	0.00397168
112	0	0	1	0	0	8425.97	0.152644	1.93762	0	0.162442	2.44276	11.1598	0
112	0	0	1	0	0	8455.51	0.517142	2.5195	0	0.508227	2.39676	11.3111	0
112	0	0	0.84375	0.15625	0	8487.94	0.0296847	2.92727	0.0058432	0.138148	1.84571	10.3059	0
112	0	0	1	0	0	8495.97	0.111367	3.0936	0	0.125665	1.53902	10.6626	0.0571835
112	1	0	0	0	0	8469.44	0.145436	3.21852	0.236535	0	1.54203	10.1194	0.0464373
114	0	0.411765	0.470588	0.117647	0	8600.8	0.292965	2.54547	0.0204133	0.508161	3.27161	13.0091	0
114	0	0	0.8125	0.1875	0	8590.86	0.204266	2.43238	0.00347222	0.444434	3.03957	12.9602	0
114	0	0	1	0	0	8505.08	0.274992	2.52045	0	0.431239	2.53101	11.8297	0
114	0	0	0.8	0.2	0	8434.5	0.523327	2.77131	0.00529587	0.643341	2.30907	11.3871	0
115	0.939394	0	0	0.0606061	0	8338.75	0.139406	2.40405	0.039139	0.00151515	1.67853	3.1007	0.00167023
115	0	0.0285714	0.771429	0.2	0	8340.71	0.0954301	2.85903	0.00601015	0.0974174	1.32582	3.28814	0.0328814
115	0.294118	0.235294	0.235294	0.235294	0	8335.86	0.0460888	2.56902	0.0322277	0.0291165	1.58053	3.1953	0.0102961
116	0	0.0857143	0.828571	0.0857143	0	8133.67	0.144778	3.67939	0.00367647	0.0954332	8.87092	9.88597	0
116	0.722222	0.0555556	0.222222	0	0	8136.12	0.0151733	3.59754	0.0488309	0.00862098	9.24533	10.2564	0
116	0	0.457143	0.2	0.171429	0.114286	8160.56	0.0353705	3.19977	0.046764	0.118363	10.0413	10.9289	0
116	0	0.2	0.285714	0	0.142857	8176.64	0.110079	2.50927	0.0247823	0.138364	10.5073	11.327	0

## Sheet: Winter season
bird	irrigated agriculture	grassland	sagebrush	sagebrush/grassland	riparian	elevation	distance to water	water density	distance to sagebrush	distance to agriculture	distance to oil/gas roads	distance to well pads	energy development index
1	0	0	0.869565	0.120773	0	8305.46	0.160835	2.57094	0.00287081	1.12123	12.3725	13.593	0
1	0	0.0193237	0.874396	0.10628	0	8391.84	0.137395	1.85986	0.00370534	0.930262	8.93604	9.55938	0
1	0	0.0430622	0.889952	0.0669856	0	8387.56	0.12185	1.83332	0.00330824	0.796948	8.6576	9.38934	0
1	0	0.0192308	0.798077	0.182692	0	8327.74	0.0752469	1.86475	0.00613468	0.41943	8.66201	9.03247	0
1	0	0	0.980861	0.0191388	0	8190.31	0.0672288	2.57483	0.00047619	1.20836	9.00598	9.7866	0
1	0	0.0625	0.783654	0.153846	0	8270.99	0.0826707	2.03341	0.00549924	1.37757	8.06612	8.70639	0
1	0	0	0.884615	0.0865385	0	8208.8	0.0639238	1.96173	0.00294858	1.66007	7.49082	8.34849	0
1	0.555556	0.178744	0.0724638	0.0434783	0.0966184	8149.57	0.0576869	3.48	0.0872526	0.0284287	9.93204	10.8559	0
2	0.0574163	0.162679	0.507177	0.129187	0.00956938	8100.55	0.0390389	2.71406	0.0212691	0.13637	3.84927	5.22817	0
2	0.298077	0.0865385	0.572115	0.0144231	0.0144231	8086.59	0.0808554	1.64549	0.0241909	0.0721511	3.26659	4.52886	0
2	0.0145631	0.121359	0.567961	0.121359	0.0242718	8099.66	0.0372704	2.95383	0.0160429	0.162504	4.01345	5.42041	0
2	0	0	0.932039	0.0436893	0	8098.22	0.0826953	2.96754	0.00144231	0.38489	4.15867	5.48431	0
2	0	0	0.980769	0.0192308	0	8100.6	0.138084	3.09525	0.000480769	0.4286	4.2875	5.62762	0
2	0	0	1	0	0	8106.65	0.262221	3.31851	0	0.672664	4.59723	5.92083	0
2	0	0.0571429	0.9	0.0333333	0	8096.14	0.108094	3.07243	0.00282196	0.271371	4.19352	5.57082	0
2	0	0	0.923077	0.0480769	0	8136.06	0.244504	2.62944	0.00173248	0.56847	3.41413	4.99531	0
2	0	0	0.653846	0.153846	0	8131.32	0.127903	2.53534	0.0100939	0.602184	3.52094	5.15471	0
2	0.0673077	0.134615	0.600962	0.115385	0.0528846	8104.01	0.0432871	3.65658	0.0213818	0.125664	5.17138	6.64027	0
2	0	0.0192308	0.759615	0.0336538	0	8104.64	0.0928384	2.46596	0.00598167	0.354285	4.11302	5.75498	0
2	0	0.0288462	0.759615	0.0865385	0.0192308	8106.11	0.0619613	2.68293	0.00733448	0.219741	3.8648	5.45632	0
2	0	0.00956938	0.569378	0.272727	0	8108.99	0.0641339	2.50455	0.0123162	0.572115	3.74892	5.40388	0
2	0	0	0.774038	0.153846	0	8056.16	0.140121	1.49265	0.00789814	1.00834	1.7051	2.17088	0.0181486
2	0	0.0241546	0.652174	0.31401	0	8111.39	0.275558	1.45448	0.00944624	3.47742	7.55117	8.52345	0
2	0	0.00966184	0.574879	0.164251	0	8117.72	0.0652728	2.41655	0.0116843	0.770222	3.54808	5.22428	0
2	0	0	0.866029	0.0191388	0	8119.26	0.109159	2.29294	0.00309524	0.843051	3.3015	5.01107	0
2	0.0193237	0.15942	0.560386	0.0676329	0	8199.82	0.0660154	3.07341	0.0165637	0.191532	1.42341	1.99728	0.102232
2	0.00961538	0.0721154	0.653846	0.216346	0.0240385	8197.65	0.126135	2.64975	0.0140169	0.197426	2.58139	5.36805	0
2	0	0	0.723005	0.258216	0	8234	0.337054	1.07189	0.0087276	1.18375	0.431391	1.31601	1.05407
2	0	0	0.889952	0.076555	0	8188.17	0.329128	1.91541	0.00245363	1.63052	0.651651	4.8743	0.12223
2	0	0.0240385	0.451923	0.115385	0	8143.24	0.047716	2.64326	0.023038	1.12986	0.740198	5.43047	0.147537
2	0	0	1	0	0	8151.88	0.0872101	1.42196	0	3.83504	7.20806	8.36562	0
2	0	0	1	0	0	8107.25	0.338034	2.47145	0	0.433214	4.01682	5.22855	0
2	0	0.0628019	0.850242	0.0338164	0	8092.87	0.13859	2.10148	0.0033109	0.700606	3.28924	5.03209	0
2	0	0.00961538	0.961538	0.00961538	0	8113.14	0.0553861	2.06971	0.000961538	0.600074	3.91961	5.62595	0
2	0	0.0533981	0.81068	0.038835	0.00485437	8105.22	0.141091	2.37452	0.00561337	0.171176	4.50818	6.14513	0
2	0	0	0.852381	0.0333333	0	8104.81	0.0566544	2.32188	0.00448403	0.493199	4.0896	5.75806	0
2	0	0.0239234	0.712919	0.114833	0	8103.9	0.0784821	2.40109	0.00816875	0.617483	3.86618	5.54027	0
2	0	0.0333333	0.647619	0.157143	0	8104.78	0.0652762	2.46933	0.00947021	0.555534	3.8771	5.53939	0
2	0	0.00961538	0.572115	0.25	0	8111.52	0.0743757	2.46296	0.0119872	0.665099	3.66198	5.32716	0
2	0	0	1	0	0	8146.78	0.1577	2.3554	0	1.0519	4.55767	5.63651	0
2	0	0	1	0	0	8140.9	0.0355758	2.21239	0	1.40614	5.08874	6.13266	0
2	0	0	0.937799	0.062201	0	8104.16	0.0482963	3.69766	0.00135128	0.26432	4.9356	6.39607	0
2	0	0	1	0	0	8107.1	0.106853	3.04778	0	0.963844	4.64482	5.86382	0
2	0	0.0047619	0.990476	0.0047619	0	8112.56	0.120054	3.82124	0	0.429008	5.27422	6.67024	0
3	0	0.0483092	0.826087	0.125604	0	8149.38	0.0810156	2.63672	0.00484329	0.400788	1.75354	3.25329	0.00673106
3	0	0	1	0	0	8168.22	0.24188	2.49216	0	0.618405	1.86719	3.0832	7.29827e-05
3	0	0	0.985577	0.0144231	0	8165.39	0.378454	2.22786	0.000360577	0.537734	2.07817	4.08676	0
3	0	0	0.985577	0.0144231	0	8165.3	0.367642	2.23176	0.000362319	0.53197	2.07255	4.09999	0
3	0	0.0289855	0.971014	0	0	8321.62	0.0776418	1.53688	0.000721154	0.566045	0.0981001	1.22421	1.22581
3	0	0.0328638	0.967136	0	0	8315.22	0.0778018	1.54542	0.000724638	0.543548	0.0947392	1.17102	1.25418
3	0	0	1	0	0	8249.06	0.243579	2.72983	0	0.682657	1.78222	2.52047	0.000796839
3	0	0	1	0	0	8339.8	0.610498	1.38671	0	0.743002	0.148113	0.276175	1.58823
3	0	0	0.924883	0	0	8311.4	0.0805514	2.06167	0.00190246	0.752297	1.06157	2.85426	0.148391
3	0	0.0142857	0.919048	0.0666667	0	8318.11	0.079307	1.35501	0.00196342	0.284217	0.562497	2.49821	0.612513
3	0.0240385	0.153846	0.697115	0.0336538	0.0432692	8236.75	0.081545	2.82881	0.012032	0.107494	1.51638	3.65233	0.0354038
3	0	0	0.899038	0.0240385	0	8293.74	0.0796398	2.04085	0.00252772	0.598957	1.07813	2.93945	0.192431
3	0	0.0144231	0.850962	0.0721154	0	8269.56	0.065962	1.68999	0.00294858	0.352127	0.318191	1.1798	1.14333
3	0	0	0.932367	0.0676329	0	8308.54	0.113354	1.8155	0.00174085	0.387505	0.923639	2.85066	0.326324
3	0.0144928	0.125604	0.661836	0.115942	0.00966184	8264.58	0.0579317	1.59817	0.0107463	0.121797	0.0856463	0.454939	1.38254
3	0	0.0193237	0.961353	0.0193237	0	8282.69	0.286435	2.67659	0.000721154	0.211144	1.50201	3.66436	0.0391012
3	0.0531401	0.154589	0.729469	0.0289855	0.0144928	8246.74	0.171451	2.46347	0.0104649	0.110749	1.37554	3.54858	0.0766633
3	0	0.00961538	0.985577	0.00480769	0	8365.18	0.0890458	1.80372	0.000240385	0.912058	0.809088	2.50611	0.180501
3	0	0	1	0	0	8327.81	0.102181	3.68477	0	0.317727	0.735551	3.88696	0.0330166
3	0	0	0.9	0.0380952	0	8299.07	0.0919769	1.91957	0.00249144	0.514819	0.985848	2.88379	0.272939
3	0	0	1	0	0	8331	0.0415466	2.23955	0	0.846343	1.21844	2.89999	0.0559044
3	0	0.0192308	0.951923	0.0144231	0.00961538	8151.6	0.139421	2.69998	0.00135781	0.189729	1.33812	3.83086	0.0584073
3	0	0	0.995146	0.00485437	0	8350.22	0.0320472	1.50369	0	0.541177	0.472277	2.39156	0.379626
3	0	0	0.971014	0.0289855	0	8405.92	0.233589	1.54	0.000770939	0.981089	0.323934	2.01141	0.350387
3	0	0.0144231	0.927885	0.0576923	0	8337.28	0.0474021	1.32856	0.00169082	0.486162	0.344569	2.24655	0.54804
3	0	0	0.990385	0	0	8348.08	0.0383988	1.64338	0.000240385	0.619214	0.630066	2.49663	0.335441
5	0	0	0.975962	0.0240385	0	8077.93	0.270956	0.890723	0.000487805	1.32999	1.45568	1.98726	0.345136
5	0	0	0.990385	0.00961538	0	8105.71	0.453435	0.722366	0.000236967	1.57717	1.31485	1.72747	0.572582
5	0	0	0.961538	0.0384615	0	8073.51	0.332822	1.08572	0.000728155	1.19344	1.70615	2.10953	0.073751
5	0	0	0.990291	0.00970874	0	8051.28	0.0892696	1.3337	0.000240385	0.960429	1.63043	2.36194	0.121627
5	0	0	0.917874	0.0821256	0	8134.78	0.0665276	1.26391	0.00180288	1.79819	1.45898	3.09841	0.142975
5	0	0.00966184	0.830918	0.115942	0	8211.27	0.172622	1.22441	0.00387532	1.91058	1.37932	3.11535	0.256819
5	0	0.00956938	0.933014	0.0574163	0	8223.58	0.393649	1.12975	0.00203242	2.13937	1.16191	2.96576	0.473406
5	0	0	1	0	0	8085.99	0.406246	1.54802	0	0.444684	0.383617	0.850292	1.00284
5	0.399038	0.0192308	0.480769	0.0480769	0.0192308	7991.71	0.0297148	3.24952	0.0334398	0.047283	1.63231	2.07238	0.0319416
5	0.134615	0.00961538	0.822115	0.00961538	0.0240385	8199.33	0.0634394	4.8789	0.00948667	0.125266	1.22954	2.04965	0.171017
5	0	0	1	0	0	8204.06	0.0855141	2.79479	0	0.577422	1.57072	1.76063	0.120094
5	0	0	1	0	0	8209.21	0.217383	3.51817	0	0.647996	0.869668	1.05001	0.340609
5	0.293269	0.100962	0.480769	0.105769	0.0192308	8180.47	0.107289	4.60337	0.0292858	0.0513311	0.994662	1.72506	0.258514
5	0	0.00961538	0.990385	0	0	8285.46	0.277811	2.90837	0.000358852	0.311382	1.36805	3.73258	0.0336145
5	0	0	1	0	0	8284.38	0.236119	1.8985	0	0.571584	0.636524	3.47697	0.242663
5	0	0	1	0	0	8415.19	0.201412	1.12598	0	0.963657	1.00455	9.71975	0.0369004
5	0	0	0.932692	0.0673077	0	8350.43	0.305444	1.41814	0.00120192	1.46945	2.52122	12.8329	0
5	0	0	0.932692	0.0673077	0	8252.53	0.218073	2.45023	0.0017493	0.229733	1.40351	7.80894	0.0598537
5	0	0	0.980676	0.0193237	0	8068.15	0.271523	1.14022	0.000241546	1.12656	1.73061	2.17325	0.0533861
5	0	0	0.956731	0.0432692	0	8178.45	0.565982	2.09861	0.000891131	0.555368	3.76394	4.18992	0
5	0	0	1	0	0	8053.58	0.145732	1.42451	0	0.91927	1.86872	2.38386	0
5	0	0	1	0	0	8148.33	0.2573	2.33603	0	1.21478	0.447776	1.08303	1.95934
5	0	0	1	0	0	8119.1	0.306054	2.09204	0	1.01338	0.459643	1.38105	2.44267
6	0.0285714	0.0380952	0.785714	0.147619	0	8195.77	0.0933521	1.38396	0.00590651	0.169183	1.06611	0.93235	1.16079
6	0	0	0.89372	0.10628	0	8179.22	0.0749373	1.43699	0.00303397	0.414635	1.37443	1.22925	0.814451
6	0	0	0.821256	0.178744	0	8158.96	0.131894	1.36422	0.00464626	0.726248	1.5087	1.59213	0.366
6	0	0	0.776699	0.131068	0	8259.77	0.102429	1.48261	0.00773669	1.10392	1.10224	1.48318	0.751222
6	0	0	0.822115	0.110577	0	8256.31	0.0912474	1.47701	0.00523871	1.11733	1.12833	1.51044	0.690464
6	0	0.0288462	0.432692	0.230769	0	8295.95	0.179338	1.59744	0.0282921	0.856954	0.919881	1.21014	1.07145
6	0	0	0.779343	0.183099	0	8075.29	0.0816349	0.981527	0.00640361	2.07274	0.116841	0.928695	2.78212
6	0	0	0.84689	0.15311	0	8128.76	0.785807	0.68779	0.00389404	2.30187	0.0427662	1.13943	3.18176
6	0	0	0.971154	0.0288462	0	8024.5	0.516237	2.15968	0.000603865	0.537556	1.71626	2.43657	0.0317915
6	0	0	0.653846	0.346154	0	8076.87	0.0792889	0.983618	0.0111342	2.11999	0.0983311	0.908365	2.63248
6	0	0	0.830918	0.130435	0	8076.3	0.0939582	0.990058	0.0049648	2.03591	0.124072	0.909567	2.71874
6	0	0.0143541	0.966507	0.00956938	0	8149.13	0.18818	1.2249	0.000833333	2.58397	0.212719	0.335318	2.85135
6	0.134615	0.00961538	0.822115	0.00961538	0.0240385	8199.33	0.0634394	4.8789	0.00948667	0.125266	1.22954	2.04965	0.171017
6	0.0961538	0.100962	0.740385	0.0625	0	8183.04	0.10097	5.04051	0.0157482	0.125589	0.834843	1.71691	0.261986
6	0	0	1	0	0	8204.19	0.201709	3.56629	0	0.649098	0.796578	0.97314	0.343259
6	0	0.00961538	0.990385	0	0	8285.46	0.277811	2.90837	0.000358852	0.311382	1.36805	3.73258	0.0336145
6	0.149758	0.0628019	0.719807	0.0483092	0.00966184	8164.29	0.400642	2.22526	0.0191029	0.111628	3.25568	6.91277	0
6	0	0	1	0	0	8213.4	0.432529	2.20854	0	0.897124	2.65382	2.82867	0
6	0	0	0.980952	0.0190476	0	8125.87	0.47	1.17244	0.000357143	1.61673	0.070797	0.713299	2.15968
6	0	0	0.990291	0.00970874	0	8220	0.207815	0.915401	0.000241546	0.71818	0.265661	1.36642	1.47281
6	0	0.0047619	0.890476	0.104762	0	8284.69	0.115385	1.04183	0.00282071	1.09562	0.0830772	2.56423	1.90341
7	0	0.0336538	0.918269	0.0336538	0	8343.25	0.0771545	2.44456	0.00220266	0.832409	1.05334	6.29893	0.0724184
7	0.405797	0.0338164	0.458937	0.0772947	0.00966184	8313.44	0.0455631	3.64279	0.0270971	0.0509711	1.86121	6.13802	0
7	0	0.00478469	0.976077	0.0191388	0	8348.49	0.107758	3.89215	0.000238095	0.269937	1.57941	6.23407	0.0129163
7	0	0	1	0	0	8389.23	0.285372	2.72489	0	0.316576	1.64641	6.49803	0.00756058
7	0	0.0144231	0.956731	0.0288462	0	8345.1	0.11027	3.83815	0.000891131	0.237769	1.61157	6.25889	0.00998578
7	0	0	0.985577	0	0	8397.1	0.253453	3.0523	0.000241546	0.6941	1.3637	7.12052	0.0970049
7	0	0.0192308	0.951923	0.0288462	0	8283.31	0.129113	3.61375	0.00076725	0.166176	0.325136	3.93128	0.0747783
7	0	0.00961538	0.927885	0.0625	0	8387.5	0.14525	3.60937	0.00197119	0.453689	1.14061	6.66246	0.10618
7	0	0	1	0	0	8364.57	0.102306	4.10492	0	0.371028	1.33755	6.14495	0.0409683
7	0	0	1	0	0	8358.37	0.107597	4.04812	0	0.359609	1.43693	6.19184	0.0286403
7	0.00480769	0.0865385	0.831731	0.0673077	0	8340.13	0.113399	3.76104	0.00785489	0.200815	1.60971	6.35083	0.0100937
7	0	0	0.990385	0.00961538	0	8357.56	0.0710914	4.14002	0.000240385	0.327154	1.46586	6.01121	0.0259364
7	0	0	0.927885	0.0673077	0	8364.63	0.15297	2.86203	0.00191388	0.264472	1.03726	4.88492	0.137976
7	0.0339806	0.0533981	0.834951	0.0776699	0	8286.96	0.275852	3.35322	0.00708338	0.137691	0.478613	3.87944	0.0747783
7	0.139423	0.115385	0.605769	0.139423	0	8277.02	0.0464478	3.8571	0.0196832	0.116536	0.348916	4.02822	0.0747783
7	0.0772947	0.0144928	0.864734	0.0338164	0.00483092	8359.69	0.0415102	4.28908	0.00419142	0.160683	1.23735	5.86299	0.055682
7	0	0	0.971154	0	0	8396.35	0.194291	3.12797	0.000600962	0.661121	1.30102	7.08488	0.129102
7	0	0	0.947368	0.0143541	0	8388.42	0.1538	3.46407	0.00100169	0.567943	1.15841	6.83657	0.132781
7	0.00961538	0.125	0.649038	0.216346	0	8309.06	0.0410582	3.61488	0.0105803	0.122152	1.7555	5.47741	0.00209388
7	0	0.00483092	0.898551	0.0386473	0	8400.89	0.146029	2.81229	0.00245363	0.501014	1.37777	7.22984	0.139208
7	0	0	1	0	0	8426.77	0.0940885	2.18215	0	0.603451	1.68552	8.24479	0.00758695
7	0	0.0628019	0.922705	0.0144928	0	8429	0.202247	2.20786	0.00195224	0.316808	1.72752	8.12528	0.00599782
7	0	0	0.995146	0.00485437	0	8352.64	0.111329	3.96848	0	0.317477	1.51439	6.22896	0.0196275
7	0	0.135266	0.772947	0.0821256	0	8408.26	0.122025	2.51943	0.00664828	0.641308	2.03931	7.85409	0
7	0	0.0865385	0.5625	0.350962	0	8430.39	0.655727	1.47314	0.0133043	0.408587	0.680593	9.05632	0.057527
7	0	0.00480769	0.995192	0	0	8413.01	0.0781913	1.50787	0.000239234	1.36883	1.82581	7.75779	0.000544051
7	0	0.0193237	0.942029	0.0386473	0	8387.71	0.131302	1.48222	0.00107143	0.932934	0.85355	7.18111	0.122009
8	0.1	0.17619	0.652381	0.0666667	0	8245.18	0.0828246	2.16944	0.0193444	0.11491	1.65391	4.24183	0.0497143
8	0	0.0434783	0.951691	0.00483092	0	8352.78	0.448584	2.0101	0.00125171	0.48754	2.38331	4.9719	0
8	0	0.167464	0.770335	0.062201	0	8310.09	0.297789	2.07158	0.0093984	0.328736	2.16671	4.75383	0
8	0	0	0.995169	0.00483092	0	8357.44	0.378392	2.32701	0.000120773	0.34324	2.90994	5.48785	0
8	0	0.0140845	0.971831	0.0140845	0	8360.18	0.42745	2.27517	0.000721154	0.399219	2.81575	5.39043	0
8	0.0673077	0.0673077	0.778846	0.0865385	0	8286.65	0.28442	3.35932	0.0111138	0.127944	0.44331	3.85365	0.0747783
8	0	0.00961538	0.927885	0.0625	0	8387.5	0.14525	3.60937	0.00197119	0.453689	1.14061	6.66246	0.10618
8	0	0	1	0	0	8364.57	0.102306	4.10492	0	0.371028	1.33755	6.14495	0.0409683
8	0	0	1	0	0	8358.37	0.107597	4.04812	0	0.359609	1.43693	6.19184	0.0286403
8	0	0	0.966346	0.0144231	0	8390.25	0.169637	3.40921	0.000650747	0.612246	1.19117	6.88743	0.129848
8	0	0	0.990385	0.00961538	0	8357.56	0.0710914	4.14002	0.000240385	0.327154	1.46586	6.01121	0.0259364
8	0	0	0.927885	0.0673077	0	8364.63	0.15297	2.86203	0.00191388	0.264472	1.03726	4.88492	0.137976
8	0	0	0.971154	0.0288462	0	8318.52	0.105717	2.24753	0.000478469	1.35581	0.43512	6.08873	0.127498
8	0.0143541	0.0478469	0.808612	0.0861244	0	8355.82	0.056368	3.86099	0.00718686	0.191869	0.906241	6.32124	0.131346
8	0	0.0144231	0.865385	0.120192	0	8366.67	0.0533066	3.81339	0.00358175	0.294641	1.01189	6.4064	0.11584
8	0	0	0.947115	0.0528846	0	8388.52	0.161001	3.58212	0.0015345	0.474282	1.15355	6.69342	0.106144
8	0	0.00480769	0.961538	0.0336538	0	8390.89	0.146418	1.47142	0.00129108	1.2437	0.876709	7.01748	0.10572
9	0.0432692	0.105769	0.634615	0.1875	0	8087.52	0.0843021	1.34169	0.0140434	0.103679	2.08849	4.85507	0
9	0	0	0.975845	0.0241546	0	8209.38	0.247534	1.92593	0.000598086	0.372503	3.02095	5.30433	0
9	0.0478469	0.114833	0.727273	0.0813397	0.0191388	8120.79	0.104545	1.59523	0.00956298	0.110318	2.42669	5.37119	0
9	0.00961538	0.0384615	0.932692	0	0.0144231	8127.91	0.181592	1.55991	0.0023513	0.19509	2.43619	5.25714	0
9	0	0	0.713592	0.271845	0	8213.29	0.107486	1.47795	0.00780042	2.5345	0.304373	0.158411	2.43056
9	0.158654	0.0721154	0.625	0.0817308	0.0528846	8074.42	0.063253	1.44515	0.0112672	0.0626111	1.78133	5.08458	0.00365055
9	0	0.0143541	0.956938	0.0287081	0	8179.03	0.0822264	3.70907	0.000952381	0.569177	1.42393	1.68037	0.0861042
11	0.0480769	0.0288462	0.884615	0.00961538	0.0288462	8005.18	0.182819	2.3817	0.00456882	0.171992	4.85304	4.91437	0
11	0	0	0.990476	0.00952381	0	8091.91	0.0803846	1.75448	0.000240385	1.32052	2.71341	2.85053	0
11	0	0	0.995192	0.00480769	0	8084.19	0.153371	1.67026	0.000234742	1.37595	2.58869	2.69856	0
11	0	0	0.708134	0.291866	0	8092.77	0.408788	1.38901	0.0105426	1.83715	1.94889	2.02147	0
11	0	0	0.129808	0.870192	0	8103.22	0.530727	1.26853	0.0628357	2.41671	1.32786	1.40071	0.198045
11	0	0	0	1	0	8082.9	0.638881	1.07572	0.309066	2.30299	1.40525	1.35269	0.154234
11	0	0	0.6875	0.3125	0	8088	0.223555	1.37393	0.012987	1.7558	1.92013	1.93763	0
11	0	0	0.0966184	0.903382	0	8099.51	0.386122	0.978028	0.0725637	2.21054	1.37531	1.36112	0.178304
11	0	0.0144231	0.764423	0.173077	0	8109.72	0.116047	2.45254	0.00675332	1.49731	3.83493	6.59663	0
11	0	0	0	1	0	8086.86	0.797254	0.925278	0.194811	2.09443	1.51772	1.46979	0.142822
11	0	0	0	0.552885	0	8081.5	0.814955	0.751542	0.285748	2.5699	1.01163	0.964731	0.207329
11	0	0.0144928	0.821256	0.0531401	0	8122.59	0.249001	3.30375	0.00535454	0.392929	2.40815	8.24487	0
11	0.747619	0.180952	0	0.0238095	0.047619	8133.08	0.223752	2.83905	0.247108	0.00677375	2.33596	6.67914	0
11	0.0432692	0.0384615	0.860577	0.0432692	0.0144231	8203.27	0.511111	2.00443	0.00547283	0.166808	2.57378	8.44754	0
11	0	0.0772947	0.618357	0.0869565	0	8142.57	0.0344552	2.61149	0.0123371	1.02828	1.09186	8.69182	0.131688
11	0.0865385	0.269231	0.576923	0.00961538	0	8152.82	0.107067	2.73299	0.0222162	0.132944	1.82052	6.55215	0.00128213
11	0	0	1	0	0	8232.08	0.450263	1.74445	0	1.02334	3.38165	8.67943	0
11	0	0	0.884615	0.115385	0	8431.65	0.080137	1.09358	0.00294858	1.30218	3.97852	12.0347	0
11	0	0	0.926829	0.0731707	0	8510.1	0.0745798	1.40992	0.00144231	0.669133	4.61733	10.684	0
11	0	0	0.956522	0.0434783	0	8509.83	0.529868	0.861741	0.00107656	1.74879	4.3343	12.1828	0
11	0	0	0.985577	0.0144231	0	8236.07	0.52175	1.45264	0.000241546	1.14602	3.7257	8.96596	0
11	0	0	1	0	0	8164.76	0.288183	2.19523	0	1.44957	3.51346	4.66804	0
11	0	0.00952381	0.809524	0.0333333	0	8122.23	0.0839963	3.70134	0.00740577	0.710326	2.22653	6.87447	0
11	0	0	0.995215	0.00478469	0	8114.25	0.228637	1.03536	0.000120773	1.73892	2.25554	2.48276	0
11	0	0	0.745192	0.254808	0	8075.7	0.620201	1.24604	0.0159664	1.67571	2.06582	2.01452	0
11	0	0	0.225962	0.774038	0	8089.03	0.715982	0.850058	0.0940287	2.05748	1.50272	1.46053	0.147763
11	0	0	0.470874	0.529126	0	8068.49	0.356788	1.87808	0.0219426	1.38844	2.31359	2.33055	0
11	0	0	0.350962	0.649038	0	8102.82	0.544985	1.39494	0.0300828	2.23738	1.61617	1.72574	0.0780375
11	0	0	0.985577	0.0144231	0	8090.53	0.243739	1.41386	0.000360577	1.71526	2.1205	2.20372	0
11	0	0	1	0	0	8108.88	0.145701	1.30521	0	1.47758	2.51371	2.72465	0
11	0	0	0.296117	0.703883	0	8101.32	0.51885	1.37645	0.0357699	2.16452	1.67808	1.78068	0.0454115
11	0	0	0.0970874	0.902913	0	8099.11	0.462685	1.33642	0.0583096	2.17569	1.59094	1.66472	0.0998346
11	0	0	0.583732	0.416268	0	8105.06	0.575148	1.41942	0.0157343	2.34339	1.49276	1.61801	0.147077
11	0	0	0	0.817308	0	8081.51	0.803203	1.08854	0.291088	2.60624	0.756298	0.802026	0.258033
11	0	0	1	0	0	8109.1	0.158687	1.2963	0	1.49527	2.49852	2.70836	0
13	0.00961538	0.00961538	0.432692	0.360577	0	8002.75	0.194357	2.23684	0.0238207	0.183465	0.277548	1.10564	0.759152
13	0.309524	0.0142857	0.3	0.37619	0	8016.6	0.082555	2.05775	0.0499055	0.0842277	0.556066	1.32232	0.572711
13	0	0.00952381	0.619048	0.242857	0	8014.29	0.22856	1.98911	0.0124051	0.23476	0.351927	1.09458	0.792681
13	0	0	0.927885	0.0721154	0	7994.97	0.0753918	2.30401	0.00189335	0.263073	0.388044	1.43398	2.70079
13	0	0	1	0	0	8054.96	0.486554	1.42139	0	0.886442	1.43573	2.37681	0.312283
13	0	0	1	0	0	8018.84	0.656452	3.33376	0	0.688663	1.95851	3.04269	0
13	0	0	0.990385	0.00961538	0	8053.31	0.0785499	1.26437	0.000240385	1.00663	1.62026	2.31194	0.136717
13	0	0	0.943662	0.056338	0	8080.94	0.0619388	2.17761	0.00154933	0.539799	0.181079	1.34432	3.11282
13	0	0	0.952153	0.0239234	0	8138.26	0.728413	1.47949	0.000961538	1.01091	1.72311	3.84225	0.0295751
13	0.0873786	0.0339806	0.868932	0.00970874	0	8226.16	0.236871	1.56921	0.00514253	0.136803	2.24416	4.69929	0
13	0	0	0.92233	0	0	8302.16	0.0828221	2.0856	0.00202265	0.689403	1.08961	2.90988	0.152521
13	0	0.0480769	0.870192	0.0817308	0	8287.34	0.0818824	1.24225	0.00319012	0.942575	1.16846	5.58593	0.0677776
13	0	0	0.971154	0.0288462	0	8393.25	0.572744	1.19563	0.000731707	0.608107	1.3346	3.62325	0.0840583
13	0	0	0.947368	0.0526316	0	8176.75	0.451198	0.631588	0.00130952	1.99342	0.841906	1.35671	3.0212
13	0	0	1	0	0	8037.93	0.426086	2.34043	0	0.469988	1.37238	3.70816	0.0751559
13	0	0	0.888889	0.111111	0	8058.81	0.0680622	1.09757	0.00298419	0.205503	1.95926	2.32382	0
13	0	0.00966184	0.826087	0.154589	0	8028.8	0.314134	1.61553	0.00417567	0.31762	0.435559	1.04547	0.91621
14	0	0.0240385	0.817308	0.115385	0	8124.66	0.614136	1.92107	0.00457448	1.05156	1.28867	1.70753	0.185865
14	0	0.00952381	0.790476	0.142857	0	8046.56	0.158499	2.27828	0.00445486	0.766212	1.52805	1.70091	0.154986
14	0	0	0.961538	0.0384615	0	8042.69	0.18108	2.84269	0.000724638	0.357515	1.92061	2.10533	0
14	0	0	1	0	0	8091.17	0.231166	2.85037	0	0.46331	2.05188	3.12606	0
14	0	0	1	0	0	8128.71	0.409822	1.14756	0	1.6438	0.0902529	0.428325	1.75956
14	0	0	0.957746	0.0422535	0	8096.21	0.260248	1.07746	0.000970874	1.86111	0.10985	0.517624	1.72853
14	0	0	0.779343	0.183099	0	8075.29	0.0816349	0.981527	0.00640361	2.07274	0.116841	0.928695	2.78212
14	0	0	0.84689	0.15311	0	8128.76	0.785807	0.68779	0.00389404	2.30187	0.0427662	1.13943	3.18176
14	0	0	0.653846	0.346154	0	8076.87	0.0792889	0.983618	0.0111342	2.11999	0.0983311	0.908365	2.63248
14	0	0	0.830918	0.130435	0	8076.3	0.0939582	0.990058	0.0049648	2.03591	0.124072	0.909567	2.71874
14	0	0	0.985714	0	0	8165.21	0.514211	1.30333	0.000240385	1.43537	0.229871	0.907782	2.22427
14	0.134615	0.00961538	0.822115	0.00961538	0.0240385	8199.33	0.0634394	4.8789	0.00948667	0.125266	1.22954	2.04965	0.171017
14	0	0	0.980676	0.0193237	0	8170	0.766395	0.690261	0.000641495	2.4671	0.0801075	0.852273	4.66594
14	0	0	0.855072	0.144928	0	8175.32	0.513937	1.27297	0.00431405	3.25138	0.0494738	0.119715	4.78182
14	0	0	0.980861	0.0191388	0	8218.33	0.499173	1.25485	0.000362319	1.93588	0.397417	0.49361	1.63528
14	0	0	0.980769	0.0192308	0	8120.52	0.362152	4.09939	0.000238095	0.398176	1.70558	0.864111	0.117034
14	0	0.00961538	0.9375	0.0528846	0	8249.51	0.691699	1.09513	0.00108173	1.34588	3.7514	10.0041	0
14	0	0	0.985714	0.0142857	0	8452.18	0.417402	0.910138	0.000240385	1.51816	4.12242	12.2542	0
14	0	0	0.870192	0.129808	0	8329.24	0.0867461	1.21064	0.00308952	1.0258	0.221741	11.0927	0.0369004
14	0	0	0.966507	0.0334928	0	8196.02	0.154929	1.0243	0.000603865	2.82682	4.38191	3.47647	0
14	0	0.0336538	0.774038	0.0192308	0	8143.31	0.105798	2.02643	0.00720096	1.22171	2.89286	4.16671	0
14	0	0.0526316	0.401914	0	0	8104.94	0.131684	3.53859	0.0313764	1.85645	3.39587	7.5468	0
14	0	0.0528846	0.615385	0.0288462	0	8123.75	0.0831105	3.64073	0.0265023	0.695151	2.16235	6.75113	0
15	0.5	0.116505	0.101942	0.281553	0	8337.98	0.0774216	2.46879	0.0613096	0.0282739	1.70004	3.25947	0.00348999
15	0	0	1	0	0	8416.95	0.605857	2.16165	0	0.614103	2.19179	3.97248	0
15	0	0	1	0	0	8401.46	0.63068	1.64192	0	0.757736	1.68822	3.21815	0.0113244
15	0	0	1	0	0	8413.35	0.540561	2.23813	0	0.553676	2.19695	3.90123	0
15	0	0	1	0	0	8410	0.211536	0.927963	0	0.875336	1.40807	3.83239	0.0588057
15	0.0238095	0.0761905	0.752381	0.0619048	0.0428571	8144.56	0.089855	2.32498	0.007758	0.117188	1.77548	3.54298	0.00210501
15	0.105769	0.0432692	0.769231	0.0817308	0	8280.9	0.211239	3.5474	0.0117773	0.13115	0.219943	3.7535	0.0747783
15	0	0.00480769	0.942308	0.0528846	0	8351.78	0.249325	1.95924	0.00131579	0.982267	0.145995	6.33636	0.127498
15	0	0	0.971154	0.0288462	0	8305.47	0.184044	2.07618	0.000724638	0.872894	0.342754	6.12813	0.127498
15	0	0	0.980676	0.0193237	0	8241.81	0.106069	1.70118	0.000600962	0.391085	0.501438	6.2002	0.137858
15	0	0	0.990431	0.00956938	0	8458.5	0.23636	1.00778	0.000238095	1.56189	2.03012	9.08645	0
15	0	0	0.985577	0.0144231	0	8462.04	0.157662	1.04741	0.000360577	1.78274	2.166	9.0571	0
15	0	0	1	0	0	8424.95	0.24642	1.47908	0	0.781481	2.06529	8.39404	0
15	0.299517	0.120773	0.516908	0.0144928	0.00966184	8293.2	0.0769763	3.94157	0.0266638	0.0615021	0.876632	4.45342	0.110164
15	0	0	0.971154	0	0	8396.35	0.194291	3.12797	0.000600962	0.661121	1.30102	7.08488	0.129102
15	0.0144928	0	0.864734	0.120773	0	8311.39	0.130888	3.85475	0.00368761	0.188885	1.94591	4.82099	0
15	0	0.173077	0.605769	0.221154	0	8422.35	0.146754	1.29071	0.0161253	1.51608	3.25756	13.417	0
15	0	0	0.942857	0.0571429	0	8256.86	0.289747	2.61571	0.00136534	0.563398	2.97418	10.5812	0
15	0	0.00952381	0.352381	0.252381	0	8148.57	0.0838762	2.78927	0.0277249	1.17238	0.6991	7.98682	0.244883
15	0	0.139423	0.153846	0.134615	0	8132.89	0.215253	3.15341	0.0619385	0.771826	1.16846	5.78832	0.118214
15	0	0.00966184	0.980676	0	0	8363.69	0.186008	1.40665	0.000358852	0.984144	0.203273	1.76851	0.494677
16	0	0	0.861244	0.133971	0	8106.81	0.133073	2.58296	0.00427375	2.00464	4.06197	7.36324	0
16	0	0	0.808612	0.162679	0	8106.28	0.126069	2.61712	0.00594731	1.99983	4.04156	7.37064	0
16	0	0.0338164	0.31401	0.0772947	0	8103.42	0.0584348	2.867	0.0378571	1.53904	3.59632	6.95791	0
16	0	0.00473934	0.744076	0.222749	0	8106.4	0.143999	2.58556	0.00971089	1.88545	3.97405	7.23793	0
16	0	0	0.913876	0.0430622	0	8125.57	0.0650492	2.91097	0.00218213	0.894866	3.27049	5.60447	0
16	0	0	0.6	0.390476	0	8123.86	0.122467	2.72883	0.0180452	1.24606	3.64928	6.08047	0
18	0.457143	0.0142857	0.285714	0.119048	0.0904762	8099.28	0.072832	0.9108	0.0561004	0.0415067	0.734495	5.37041	0.398991
18	0	0.0238095	0.928571	0.047619	0	8134.01	0.526261	0.976991	0.00286399	0.219897	0.210811	5.49287	0.42401
18	0.144231	0.00961538	0.75	0.0913462	0	8097.05	0.360435	1.07681	0.0146999	0.116779	0.880337	5.00717	0.315337
18	0	0	1	0	0	8106.61	0.168831	1.24868	0	0.953286	0.887159	4.46253	0.341141
18	0	0	1	0	0	8113.07	0.225502	1.31679	0	0.908403	0.922395	4.40097	0.332448
19	0.210526	0.0526316	0.684211	0.0287081	0.0239234	8193.61	0.0688827	4.73296	0.0191709	0.0894695	1.23872	2.02071	0.175061
19	0	0	0.9375	0.0625	0	8201.97	0.0498265	2.71797	0.00147788	0.65089	1.89684	2.10113	0
19	0	0	0.990385	0.00961538	0	8262.66	0.0956451	2.62064	0.000240385	1.17695	1.42666	1.5848	0.200518
19	0.052381	0.133333	0.752381	0.0380952	0.0142857	8247.66	0.183336	2.4447	0.00901482	0.124714	1.3666	3.52422	0.0809269
19	0	0	0.990385	0	0	8260.58	0.0864817	1.47577	0.000239234	2.72288	0.205467	0.856685	3.61656
19	0	0.00966184	0.980676	0	0	8273.3	0.162825	1.29696	0.000480769	1.18556	0.146146	4.69024	0.166106
19	0	0	0.873239	0.126761	0	8156.49	0.409055	1.45045	0.00336092	3.03175	0.0825268	0.419355	3.8377
19	0	0	0.859903	0.140097	0	8144.66	0.436896	1.41809	0.00424365	3.09564	0.0712629	0.339932	3.93544
19	0	0	0.864078	0.106796	0	8148.15	0.080717	1.19086	0.00374825	2.46975	0.0846738	0.288584	2.04727
19	0	0.0422535	0.906103	0.0516432	0	8118.38	0.0976611	1.12495	0.00205314	1.92386	0.0518171	0.526622	2.69442
19	0	0	0.879808	0.120192	0	8153.21	0.455605	1.44625	0.00306935	3.08542	0.096403	0.382092	3.98771
19	0	0	0.747573	0.237864	0	8214.67	0.097291	1.49464	0.00704539	2.53014	0.297823	0.152379	2.44527
19	0	0	0.875	0.110577	0	8177.82	0.0771151	1.4591	0.00361995	2.74986	0.207618	0.201085	2.79546
19	0	0	1	0	0	8204.19	0.201709	3.56629	0	0.649098	0.796578	0.97314	0.343259
19	0	0	1	0	0	8259.47	0.423608	2.90842	0	0.48612	1.64238	3.09165	0.00786022
19	0	0	0.938095	0.0619048	0	8175.61	0.086757	1.46529	0.00162007	2.78446	0.154365	0.240969	2.91075
19	0	0.0432692	0.322115	0.605769	0	8286.06	0.26607	1.38915	0.0398909	1.2269	0.246382	5.92308	0.292382
19	0	0	0.401914	0.110048	0	8604.3	0.751597	1.74465	0.0219348	0.810236	0.748015	0.960193	3.04867
19	0	0	0.610577	0.389423	0	8218.64	0.244538	0.656181	0.0121178	2.74642	7.01383	6.75935	0
19	0	0.0193237	0.859903	0	0	8111.43	0.122191	2.41635	0.00619445	1.25333	4.66911	8.53922	0
19	0	0	0.866667	0.133333	0	8114.81	0.0653486	1.2754	0.00360031	2.90796	7.54986	7.96005	0
20	0	0	0.927885	0.0480769	0	8107.98	0.319483	1.05779	0.00175692	1.77881	0.137145	0.77959	2.36829
20	0	0	1	0	0	8137.67	0.414005	1.14605	0	1.65167	0.104487	0.573472	2.02732
20	0	0	0.942029	0.057971	0	8077.14	0.12861	1.03505	0.00149209	1.97547	0.117764	0.670574	2.06632
20	0	0	0.864078	0.11165	0	8098.44	0.336359	1.04567	0.00366698	1.78478	0.118855	0.869644	2.5109
20	0	0.0144928	0.903382	0.0821256	0	8075.72	0.0990958	1.1016	0.00197286	1.48886	0.806936	0.944713	0.62939
20	0	0.0144231	0.817308	0.0769231	0	8153.7	0.774237	1.22751	0.0046941	1.35506	1.00202	1.55598	0.327655
20	0	0	0.779343	0.183099	0	8075.29	0.0816349	0.981527	0.00640361	2.07274	0.116841	0.928695	2.78212
20	0	0	1	0	0	8054.96	0.486554	1.42139	0	0.886442	1.43573	2.37681	0.312283
20	0	0	0.653846	0.346154	0	8076.87	0.0792889	0.983618	0.0111342	2.11999	0.0983311	0.908365	2.63248
20	0	0	0.830918	0.130435	0	8076.3	0.0939582	0.990058	0.0049648	2.03591	0.124072	0.909567	2.71874
20	0	0.0143541	0.966507	0.00956938	0	8149.13	0.18818	1.2249	0.000833333	2.58397	0.212719	0.335318	2.85135
20	0	0	0.956311	0.0436893	0	8164.98	0.0780756	1.43578	0.00108173	2.79014	0.201123	0.241301	2.88488
20	0.0619048	0.214286	0.566667	0.0238095	0.0238095	8238.17	0.0811591	2.45913	0.0168753	0.119659	1.26145	3.59698	0.0927577
20	0.0776699	0.11165	0.737864	0.0728155	0	8182.66	0.102455	5.08218	0.0166482	0.127364	0.803576	1.70152	0.268817
20	0	0	0.901408	0.0985915	0	8198.6	0.200438	1.51346	0.00251551	2.78691	0.0815026	0.451523	3.28288
21	0.209524	0.0904762	0.590476	0.0142857	0	8116.1	0.0540053	3.06306	0.00816518	0.101902	2.98857	3.73738	0
21	0.0289855	0.0483092	0.628019	0.294686	0	8114.72	0.0539111	2.9016	0.0194848	0.145569	3.2391	3.86846	0
21	0.0192308	0.00480769	0.9375	0.0240385	0	8161.41	0.14203	3.2805	0.00161229	0.163552	2.66325	3.23038	0
21	0	0	0.873239	0.126761	0	8105.13	0.315305	2.60367	0.0040226	0.209386	3.57278	4.26905	0
21	0	0.0192308	0.966346	0	0	8145.07	0.121256	3.2503	0.000899783	0.219679	2.76756	3.3891	0
21	0.690476	0.0666667	0.114286	0.109524	0	8071.48	0.0900788	2.03803	0.0786954	0.011012	4.25684	4.8867	0
21	0	0	1	0	0	8157.25	0.207841	2.27188	0	1.32653	3.42034	4.72189	0
21	0.0758294	0.028436	0.696682	0.175355	0.0236967	8097.88	0.316429	2.47988	0.0133716	0.143307	3.74578	4.40209	0
21	0.673077	0.0528846	0.197115	0.0769231	0	8074.27	0.0880694	2.13024	0.0805083	0.0153779	4.39186	4.9847	0
21	0.399038	0.0192308	0.471154	0.00961538	0	8114.67	0.0620789	3.05518	0.00672759	0.0554627	2.932	3.72674	0
21	0.423077	0.0961538	0.365385	0.0913462	0	8149.83	0.0683282	3.40609	0.0335786	0.0369619	1.94228	2.81286	0
21	0.0526316	0.181818	0.526316	0.229665	0	8212.45	0.0779368	2.95287	0.0207843	0.0915292	1.20957	1.78641	0.258725
21	0.0478469	0.162679	0.502392	0.277512	0	8210.98	0.0924713	2.94179	0.0254402	0.102116	1.14259	1.76806	0.311802
21	0	0	0.850962	0.149038	0	8086.82	0.387009	2.31189	0.00376867	0.464971	4.78269	4.76187	0
21	0	0	0.708738	0.291262	0	8052.27	0.371358	2.74131	0.00952699	0.379527	4.57968	4.66965	0
21	0.418269	0.0528846	0.278846	0.25	0	8113.8	0.0543024	2.85349	0.0837509	0.0551182	3.32668	3.90959	0
21	0.401914	0.0478469	0.296651	0.253589	0	8113.05	0.0564984	2.83425	0.0827437	0.0577724	3.33987	3.92927	0
21	0.206731	0.0961538	0.394231	0.25	0	8118.35	0.0390736	3.01707	0.0376489	0.0998871	3.161	3.74165	0
21	0.552885	0.0576923	0.168269	0.221154	0	8114.72	0.0584229	2.90374	0.113337	0.0359826	3.32739	3.88952	0
23	0.826087	0.115942	0.0144928	0.0386473	0	8286.28	0.0571861	2.80078	0.114231	0.00510956	4.33391	5.97193	0
23	0	0.0526316	0.904306	0.0430622	0	8360.33	0.185279	2.54506	0.00228365	0.246635	4.93223	7.10594	0
23	0	0.0724638	0.584541	0.342995	0	8380.93	0.252498	2.60415	0.0170065	0.305256	5.06141	7.25515	0
23	0	0.138756	0.755981	0.105263	0	8407.21	0.553473	2.60656	0.00795004	0.503352	5.41648	7.66044	0
23	0	0.0240385	0.764423	0.211538	0	8428.47	0.381033	2.5654	0.00985775	0.362689	6.11268	7.64967	0
23	0	0.0288462	0.798077	0.173077	0	8421.26	0.561786	2.56533	0.00586178	0.387209	5.39596	7.60054	0
23	0.103286	0.0704225	0.788732	0.0375587	0	8280.56	0.447013	2.48021	0.00683297	0.111469	3.8976	5.37261	0
23	0	0.00956938	0.966507	0.0239234	0	8278.47	0.345215	2.25426	0.000595238	0.26009	3.84444	5.21367	0
23	0	0	0.832536	0.167464	0	8222.68	0.252805	1.68597	0.00617116	0.255406	4.30371	6.05474	0
23	0.0526316	0	0.904306	0.0430622	0	8271.98	0.133549	2.25409	0.00417078	0.171692	4.0553	5.5457	0
23	0.00480769	0.0384615	0.927885	0.0288462	0	8284.07	0.175399	2.57817	0.00168269	0.194532	4.23314	5.60795	0
23	0.430622	0.287081	0.210526	0.0669856	0	8301.57	0.0965161	3.7445	0.0547628	0.0315809	1.12834	4.82966	0.158056
23	0	0	0.927885	0.0673077	0	8364.63	0.15297	2.86203	0.00191388	0.264472	1.03726	4.88492	0.137976
23	0.153846	0.144231	0.567308	0.100962	0.00961538	8303.43	0.0702652	3.93654	0.0180987	0.0673915	1.11437	4.71255	0.145544
23	0.307692	0.0528846	0.322115	0.259615	0.0480769	8283.21	0.165419	2.11886	0.038685	0.0582228	1.07677	2.77252	0.0701166
23	0	0.0917874	0.753623	0.115942	0	8344.46	0.206879	2.91848	0.00762507	0.205283	0.705467	1.73714	0.42004
23	0.0676329	0.0917874	0.73913	0.101449	0	8311.77	0.149809	2.90681	0.00753351	0.156687	0.629212	1.62465	0.561211
23	0	0.1875	0.596154	0.216346	0	8341.33	0.292918	3.16412	0.0131758	0.300786	1.00587	1.85299	0.185123
23	0.135266	0.0966184	0.714976	0.0531401	0	8287.48	0.133708	2.95545	0.00933937	0.137894	0.725172	1.70753	0.481235
24	0	0.0384615	0.725962	0.225962	0	8374.31	0.0898121	2.51268	0.00914413	0.541837	13.25	15.8726	0
24	0	0.0382775	0.425837	0.339713	0	8359.02	0.0471848	2.60182	0.0241989	0.403915	13.318	15.8454	0
24	0	0.0430622	0.401914	0.291866	0	8350.93	0.0393035	2.51343	0.0266959	0.38309	13.4146	15.95	0
24	0	0	0.9	0.0571429	0	8376.81	0.108152	2.27016	0.00325775	0.747008	13.6297	16.4147	0
24	0	0	1	0	0	8180.22	0.200685	3.27632	0	0.498054	9.30218	10.1886	0
24	0	0	0.783654	0.216346	0	8428.53	0.409809	2.72887	0.00624403	0.70591	12.7464	15.33	0
24	0	0.154589	0.468599	0.241546	0	8252.41	0.088673	2.78916	0.0188794	0.660218	12.8653	13.9155	0
24	0	0	0.904306	0.076555	0	8360.12	0.0857082	2.04029	0.00252889	1.81695	11.5965	12.9171	0
24	0	0	0.990385	0.00961538	0	8159.85	0.669527	1.67506	0.000240385	0.832654	4.10599	5.08824	0
24	0	0	1	0	0	8105.62	0.12571	3.44339	0	0.500437	4.56091	5.95499	0
24	0	0.00956938	0.569378	0.272727	0	8108.99	0.0641339	2.50455	0.0123162	0.572115	3.74892	5.40388	0
24	0	0.0338164	0.642512	0.15942	0	8104.76	0.0652762	2.46831	0.00951552	0.557634	3.8771	5.53939	0
24	0	0	0.836538	0.163462	0	8701.18	0.499029	1.86647	0.00497839	1.53751	9.58139	12.0163	0
24	0	0	0.975962	0.0240385	0	8240.34	0.127084	1.24479	0.000600962	2.19503	6.35495	6.49427	0
24	0	0.0287081	0.799043	0.138756	0	8371.48	0.0870768	2.20455	0.00457312	1.23202	11.8648	14.4318	0
24	0	0.0288462	0.778846	0.182692	0	8368.38	0.0609591	2.1798	0.0049069	1.29359	11.7869	14.3646	0
24	0	0.0238095	0.680952	0.238095	0	8348.55	0.0295846	2.15589	0.0105657	1.2679	11.8101	14.2469	0
24	0	0.00952381	0.704762	0.233333	0	8350.26	0.0301582	2.16254	0.00921069	1.26326	11.8086	14.2598	0
24	0	0	0.865385	0.134615	0	8145.15	0.672785	0.739443	0.00330824	1.81267	8.10155	7.39785	0
24	0	0.101942	0.475728	0.334951	0	8326.74	0.11719	1.91781	0.023386	1.26033	4.34232	11.0946	0
24	0	0.0143541	0.440191	0.397129	0	8412.46	0.518505	0.442724	0.0224915	2.15033	3.89473	2.98499	0
24	0	0.0336538	0.774038	0.0192308	0	8143.31	0.105798	2.02643	0.00720096	1.22171	2.89286	4.16671	0
24	0	0.00952381	0.695238	0.0666667	0	8118.1	0.079634	3.1655	0.0112314	0.591444	2.93887	5.4406	0
24	0	0.125	0.576923	0.120192	0	8132.53	0.0762261	3.22832	0.0175082	0.233235	0.991763	6.8997	0.34738
24	0.150485	0.092233	0.150485	0.18932	0	8309.04	0.0657337	3.14369	0.0688703	0.080922	13.377	15.4156	0
24	0	0.0628019	0.850242	0.0338164	0	8092.87	0.13859	2.10148	0.0033109	0.700606	3.28924	5.03209	0
24	0	0.00480769	0.894231	0.100962	0	8104	0.105107	3.53886	0.00377858	0.224484	4.76627	6.25308	0
24	0	0	0.852381	0.0333333	0	8104.81	0.0566544	2.32188	0.00448403	0.493199	4.0896	5.75806	0
24	0	0.0239234	0.712919	0.114833	0	8103.9	0.0784821	2.40109	0.00816875	0.617483	3.86618	5.54027	0
25	0	0	0.528846	0.158654	0	8311.25	0.249308	1.54765	0.0229354	0.978333	0.894491	1.28887	1.02971
25	0.0144928	0.101449	0.874396	0.00966184	0	8333.42	0.119441	1.46538	0.00376618	0.177542	0.454123	0.97912	1.42212
25	0	0	0.502392	0.15311	0	8328.27	0.262202	1.57325	0.0231038	0.93405	0.829844	1.21634	1.0876
25	0	0.0336538	0.639423	0.1875	0	8248.26	0.108671	1.63922	0.0110153	0.752208	0.857596	1.11873	1.10807
25	0	0	0.822115	0.110577	0	8256.31	0.0912474	1.47701	0.00523871	1.11733	1.12833	1.51044	0.690464
25	0	0	0.690821	0.144928	0	8268.44	0.145945	1.49456	0.0127812	1.06266	1.03266	1.42685	0.849911
25	0	0	0.956522	0.0434783	0	8256.13	0.211475	1.70037	0.000961538	0.454863	0.0761565	0.47114	1.31688
25	0	0	0.884058	0.0821256	0	8271.96	0.22565	1.69135	0.00258626	0.412937	0.0804566	0.414611	1.32144
25	0	0	0.904306	0.0956938	0	8272.12	0.393813	1.54324	0.00226303	0.763106	0.798097	1.37228	0.902632
25	0	0	0.835749	0.135266	0	8279.98	0.220484	1.67614	0.00418611	0.352371	0.0811613	0.400041	1.32944
25	0	0.0238095	0.947619	0.0285714	0	8240.56	0.145759	1.74794	0.00132212	0.279895	0.0934318	0.838185	1.30345
25	0	0	1	0	0	8381.7	0.119468	1.07701	0	1.00804	0.170774	2.5419	0.260406
25	0	0	0.907767	0.0728155	0	8216.2	0.075903	1.67544	0.00233344	0.62634	0.362718	0.784743	1.26719
25	0	0.0144231	0.850962	0.0721154	0	8269.56	0.065962	1.68999	0.00294858	0.352127	0.318191	1.1798	1.14333
25	0	0	0.976077	0.0239234	0	8304.68	0.328433	1.50124	0.000357143	0.476495	0.0904515	0.199522	1.53543
25	0.5625	0.0625	0.25	0.0480769	0.0528846	8162.06	0.336424	1.96425	0.0929395	0.0264354	2.74943	8.34397	0
25	0	0.00966184	0.985507	0.00483092	0	8245.65	0.536595	1.31879	0.000240385	2.03218	0.307463	0.688491	1.28491
25	0	0	0.904762	0.0952381	0	8263.38	0.43152	1.54758	0.00198239	0.683943	0.753889	1.37749	0.889488
25	0	0	0.879227	0.120773	0	8184.45	0.305509	1.6297	0.00269402	0.606212	1.98255	2.76377	0
27	0	0.0386473	0.584541	0.371981	0.00483092	8322.03	0.427864	2.03923	0.0137806	0.164987	0.0813663	1.10101	3.30125
27	0.0288462	0.346154	0.278846	0.326923	0.0192308	8308.73	0.773772	2.03923	0.0614046	0.113581	0.2864	1.32783	2.03099
28	0.543269	0.0817308	0.336538	0.0384615	0	8157.23	0.133303	3.61164	0.0697261	0.0396592	2.04154	3.08399	0
28	0.125	0.0721154	0.682692	0.110577	0	8191.25	0.0786623	3.29748	0.0137338	0.1274	1.89002	2.65405	0
28	0	0.0241546	0.89372	0.0821256	0	8163.12	0.145715	3.63536	0.00332647	0.16365	1.71114	2.75084	0.00363219
28	0.150485	0.0776699	0.65534	0.116505	0	8190.88	0.0784114	3.30486	0.0168167	0.116117	1.90297	2.67371	0
28	0.3125	0.173077	0.317308	0.197115	0	8255.93	0.0380034	1.90313	0.0478273	0.0629591	0.367255	0.532658	3.81216
28	0.115385	0.375	0.25	0.240385	0.00961538	8305.84	0.123781	1.81925	0.0483029	0.0905942	0.34573	1.21044	3.06859
28	0.00966184	0.570048	0.0676329	0.328502	0.0241546	8318.97	0.208304	1.75372	0.0858301	0.133617	0.281771	1.33116	2.52912
28	0	0.014218	0.815166	0.156398	0	8110.72	0.152705	2.81972	0.00573653	0.184367	3.30603	3.99262	0
28	0.507246	0.0483092	0.120773	0.294686	0.0289855	8108.05	0.0969863	2.72231	0.111921	0.0350673	3.50672	4.10654	0
28	0.0758294	0.028436	0.696682	0.175355	0.0236967	8097.88	0.316429	2.47988	0.0133716	0.143307	3.74578	4.40209	0
28	0.673077	0.0528846	0.197115	0.0769231	0	8074.27	0.0880694	2.13024	0.0805083	0.0153779	4.39186	4.9847	0
28	0	0.00952381	0.861905	0.128571	0	8034.6	0.125816	1.89873	0.0043712	1.0116	7.28152	7.19398	0
28	0	0.0241546	0.652174	0.31401	0	8111.39	0.275558	1.45448	0.00944624	3.47742	7.55117	8.52345	0
28	0	0.0192308	0.6875	0.134615	0	8189.55	0.0757138	1.45881	0.00989389	1.95593	2.97412	3.28704	0
28	0.0434783	0.0628019	0.792271	0.0869565	0.0144928	8188.4	0.196316	2.36757	0.00887133	0.16122	1.83752	6.98112	0.000155503
28	0	0.0143541	0.966507	0	0	8209.38	0.183808	2.10093	0.00132212	0.878296	3.08273	9.22344	0
28	0	0	0.933333	0.0666667	0	8445.17	0.0808337	1.42009	0.00177374	0.852342	4.33092	11.0185	0
28	0	0	0.913462	0.0865385	0	8232.1	0.378088	1.95754	0.00256554	0.411864	4.19981	4.78529	0
28	0.0241546	0.0289855	0.864734	0.0821256	0	8179.08	0.177124	1.8791	0.00454157	0.189868	4.26826	4.51221	0
29	0	0	0.966184	0.0338164	0	8340.58	0.355011	1.65354	0.000891131	0.472311	0.104995	1.57628	1.05646
29	0.399038	0.100962	0.283654	0.206731	0	8292.54	0.0777289	2.06145	0.052554	0.0637874	0.848858	1.50973	0.910939
29	0.171429	0.138095	0.490476	0.2	0	8299.01	0.0972479	1.8563	0.025564	0.0739202	0.706028	1.65625	1.0821
29	0.287081	0.105263	0.373206	0.22488	0	8295.24	0.0842131	2.05401	0.0430749	0.0876181	0.838624	1.52474	0.905542
29	0.0144231	0.0721154	0.673077	0.240385	0	8304.75	0.157464	2.01912	0.0113797	0.176847	0.78667	1.5742	0.896468
29	0.294686	0.00966184	0.637681	0.057971	0	8292.41	0.0759146	1.88667	0.0243321	0.074835	0.642829	1.71069	0.938336
29	0.143541	0.0239234	0.755981	0.076555	0	8296.6	0.0956196	1.876	0.0107485	0.107405	0.690368	1.74772	0.883045
29	0	0	0.850242	0.149758	0	8306.36	0.195629	1.84576	0.00521294	0.17912	0.746694	1.75969	0.868406
29	0	0.0143541	0.822967	0.162679	0	8323.08	0.327683	2.00341	0.00462563	0.329334	0.532776	1.44428	1.01232
29	0	0.0194175	0.805825	0.174757	0	8323.28	0.311788	2.01995	0.0052266	0.316056	0.537693	1.42399	1.00695
29	0	0.028436	0.924171	0.0473934	0	8087.7	0.192791	3.73009	0.00183205	0.265807	3.47401	4.0704	0
29	0	0.0144928	0.922705	0.0628019	0	8231.84	0.117268	2.11327	0.00180288	0.538007	0.826948	1.47958	0.322326
29	0.135266	0.0434783	0.743961	0.057971	0.00966184	8162.97	0.398486	2.27197	0.0133849	0.118359	3.18926	6.83257	0
29	0	0	0.905213	0.0947867	0	8452.58	0.151084	1.53264	0.00245663	0.528231	1.13231	11.5794	0.0360356
29	0	0.111111	0.468599	0.0724638	0	8140.78	0.193842	2.3869	0.0191048	0.513787	4.37318	7.59823	0
29	0	0.0956938	0.631579	0.0813397	0	8173.14	0.0786306	2.24778	0.0169831	0.67066	4.10488	7.69072	0
29	0	0.0528846	0.615385	0.0288462	0	8123.75	0.0831105	3.64073	0.0265023	0.695151	2.16235	6.75113	0
29	0	0.0480769	0.697115	0.254808	0	8335.34	0.177889	1.57158	0.012382	0.380596	0.12755	1.77148	0.924027
29	0	0	0.9375	0.0625	0	8305.07	0.188947	1.86622	0.00154188	0.188421	0.760673	1.74814	0.853653
29	0.0338164	0.0772947	0.700483	0.188406	0	8301.42	0.128052	1.86828	0.014604	0.123395	0.732211	1.72914	0.954662
29	0	0	0.966507	0.0334928	0	8127.48	0.388685	3.41296	0.000721154	0.384519	1.39767	2.92051	0.114829
29	0.00961538	0.0865385	0.677885	0.225962	0	8309.38	0.241873	1.80129	0.0146628	0.168061	0.683128	1.76509	0.891152
29	0	0.0336538	0.6875	0.278846	0	8317.15	0.217859	2.09337	0.0097892	0.233417	0.647153	1.41294	0.955322
29	0.00952381	0.0714286	0.647619	0.261905	0	8308.05	0.164409	2.07829	0.0119814	0.187485	0.756947	1.49605	0.928329
29	0	0.0428571	0.742857	0.214286	0	8321.75	0.243105	2.07076	0.00762044	0.254848	0.580184	1.37138	0.980421
29	0.966346	0.0192308	0	0	0.0144231	8140.62	0.0760225	2.27965	0.18677	0.000841346	0.509479	1.95465	0.468178
30	0	0.122066	0.159624	0.0751174	0	8063.8	0.0714104	3.10667	0.0518467	0.391259	1.82722	3.63978	0.000241342
30	0.298077	0.0865385	0.572115	0.0144231	0.0144231	8086.59	0.0808554	1.64549	0.0241909	0.0721511	3.26659	4.52886	0
30	0.0145631	0.121359	0.567961	0.121359	0.0242718	8099.66	0.0372704	2.95383	0.0160429	0.162504	4.01345	5.42041	0
30	0	0	0.961165	0.0291262	0	8102.52	0.0896527	3.08207	0.000841346	0.589104	4.3538	5.6447	0
30	0	0	0.980769	0.0192308	0	8100.6	0.138084	3.09525	0.000480769	0.4286	4.2875	5.62762	0
30	0	0	1	0	0	8106.96	0.26028	3.41599	0	0.647278	4.65426	6.00508	0
30	0.0144231	0.0865385	0.730769	0.0769231	0.0240385	8095.8	0.0749135	3.07266	0.00894042	0.182866	4.13532	5.53858	0
30	0	0	1	0	0	8102.53	0.264196	2.45313	0	0.324574	3.92229	5.16544	0
30	0	0	1	0	0	8104.33	0.0900571	3.36558	0	0.311089	4.38021	5.80148	0
30	0.0673077	0.134615	0.600962	0.115385	0.0528846	8104.01	0.0432871	3.65658	0.0213818	0.125664	5.17138	6.64027	0
30	0	0	0.932367	0.0676329	0	8104.13	0.0499649	3.6921	0.0018427	0.262846	4.91919	6.38136	0
30	0	0	1	0	0	8105.62	0.12571	3.44339	0	0.500437	4.56091	5.95499	0
30	0	0.00956938	0.569378	0.272727	0	8108.99	0.0641339	2.50455	0.0123162	0.572115	3.74892	5.40388	0
30	0	0	0.976077	0.0239234	0	8311.33	0.116105	1.36782	0.000600962	0.778532	5.19029	8.49422	0
30	0	0	1	0	0	8249.69	0.373932	1.59218	0	1.30729	2.10885	8.88431	0
30	0	0.0772947	0.618357	0.0869565	0	8142.57	0.0344552	2.61149	0.0123371	1.02828	1.09186	8.69182	0.131688
30	0	0.0384615	0.778846	0.0673077	0	8145.07	0.125356	2.5734	0.00931847	0.873045	1.48901	8.63362	0.0801413
30	0	0.0144231	0.769231	0.00961538	0	8153.4	0.11197	1.70049	0.00869261	1.60715	3.03768	3.7573	0
30	0	0.0676329	0.908213	0	0	8258.42	0.145518	0.56095	0.00227396	3.00984	4.40599	2.42533	0
30	0	0.052381	0.37619	0.0761905	0	8171.73	0.0721283	2.2119	0.0246621	1.22248	3.07552	8.6324	0
30	0	0.101942	0.475728	0.334951	0	8326.74	0.11719	1.91781	0.023386	1.26033	4.34232	11.0946	0
30	0	0.0673077	0.846154	0.0865385	0	8387.62	0.638683	0.44859	0.00467463	2.31047	3.74241	1.71009	0.0455575
30	0	0.0336538	0.774038	0.0192308	0	8143.31	0.105798	2.02643	0.00720096	1.22171	2.89286	4.16671	0
30	0	0.144231	0.673077	0.173077	0	8326.23	0.332002	0.544408	0.0121878	2.87019	4.38368	2.69132	0
31	0	0	1	0	0	8160.4	0.169794	3.58253	0.000480769	0.238326	9.14052	10.0935	0
31	0	0.0242718	0.786408	0.11165	0	8172.34	0.303972	3.51027	0.00682342	0.260868	9.59616	10.495	0
31	0	0	0.875	0.0625	0	8180.31	0.0484687	2.24678	0.00377327	1.44429	8.73946	9.49971	0
31	0	0	0.980769	0.0192308	0	8194.26	0.0834864	2.65084	0.000480769	1.11945	9.0645	9.85491	0
31	0	0	0.947115	0.0336538	0	8230	0.0752668	2.30225	0.00138522	1.26278	9.45892	10.1832	0
31	0	0	0.94686	0.0338164	0	8227.79	0.0755121	2.29593	0.00137853	1.28566	9.43018	10.1539	0
31	0	0	0.966346	0.0336538	0	8434.76	0.269924	1.51754	0.000841346	0.942861	7.8668	8.89719	0
31	0	0.00483092	0.729469	0.164251	0	8203.32	0.0280247	1.94491	0.00797736	1.71172	7.35964	8.21712	0
31	0	0.00480769	0.956731	0	0	8263.04	0.372916	2.47234	0.000841346	0.761746	10.8985	11.6272	0
31	0	0.052381	0.852381	0.0619048	0	8268.88	0.173905	1.83287	0.00438446	1.45288	8.68477	9.30857	0
31	0	0	0.976077	0.0239234	0	8311.33	0.116105	1.36782	0.000600962	0.778532	5.19029	8.49422	0
31	0.225352	0.0751174	0.596244	0.084507	0	8128.96	0.0611031	3.48908	0.020361	0.0668526	1.52133	2.5059	0.0274443
31	0	0	0.913043	0.0869565	0	7988.88	0.0815255	1.4149	0.00231282	1.5765	3.02699	7.51109	0
31	0	0	0.860577	0.139423	0	7983.69	0.0836368	2.46779	0.00362778	1.81668	4.14423	4.09047	0
31	0	0.00952381	0.704762	0.233333	0	8350.26	0.0301582	2.16254	0.00921069	1.26326	11.8086	14.2598	0
31	0	0.0144231	0.769231	0.00961538	0	8153.4	0.11197	1.70049	0.00869261	1.60715	3.03768	3.7573	0
31	0	0.0047619	0.985714	0.00952381	0	8247.34	0.598486	2.18788	0.000239234	0.334258	2.34592	8.64618	0
31	0	0.0144928	0.724638	0.0772947	0	8119.43	0.214032	3.46144	0.00904848	0.421984	2.44531	8.1532	0
31	0	0	0.985714	0.0142857	0	8108.46	0.256128	1.78162	0.000240385	3.54993	7.27267	8.02233	0
32	0	0	0.990385	0.00961538	0	8111.38	0.0806363	3.74813	0.000239234	0.271367	5.6141	7.02838	0
32	0	0	1	0	0	8110.37	0.0458093	3.6059	0	0.233044	5.90423	7.31324	0
32	0	0	1	0	0	8117.84	0.0779961	3.74992	0	0.25983	5.69175	7.07834	0
32	0	0.0616114	0.909953	0.028436	0	8112.49	0.127853	3.83316	0.00311213	0.353237	5.4076	6.8128	0
32	0.00966184	0.0338164	0.932367	0.0241546	0	8119.59	0.0732465	3.72805	0.00247327	0.186701	5.78829	7.1599	0
32	0	0.0776699	0.84466	0.0776699	0	8109.68	0.118842	3.79714	0.00544854	0.344895	5.33503	6.74809	0
32	0	0	0.763285	0.178744	0	8157.41	0.0549548	2.07964	0.00700886	1.56795	5.55509	6.46699	0
32	0	0	0.475962	0.427885	0	8156.8	0.100123	2.44677	0.0256661	1.09834	5.80908	6.81486	0
32	0	0	1	0	0	8497.18	0.546561	1.83541	0	2.031	9.55096	10.6561	0
32	0.00478469	0.062201	0.77512	0.0239234	0	8103.5	0.137659	2.51245	0.0068046	0.204498	4.30207	5.92896	0
32	0	0	0.932367	0.0676329	0	8104.13	0.0499649	3.6921	0.0018427	0.262846	4.91919	6.38136	0
32	0	0	1	0	0	8105.62	0.12571	3.44339	0	0.500437	4.56091	5.95499	0
32	0.0145631	0.0436893	0.830097	0.106796	0.00485437	8104.06	0.124241	3.37005	0.00650077	0.176023	4.60743	6.10957	0
32	0	0	0.774038	0.153846	0	8056.16	0.140121	1.49265	0.00789814	1.00834	1.7051	2.17088	0.0181486
32	0	0.0241546	0.652174	0.31401	0	8111.39	0.275558	1.45448	0.00944624	3.47742	7.55117	8.52345	0
32	0	0.00966184	0.574879	0.164251	0	8117.72	0.0652728	2.41655	0.0116843	0.770222	3.54808	5.22428	0
32	0	0	0.866029	0.0191388	0	8119.26	0.109159	2.29294	0.00309524	0.843051	3.3015	5.01107	0
32	0	0.0190476	0.761905	0.2	0	8361.73	0.0481479	2.17234	0.00577638	1.2943	11.788	14.3243	0
32	0	0.130435	0.400966	0.0869565	0.0628019	8143.47	0.184625	2.31735	0.0240144	0.422252	4.45925	7.50649	0
32	0	0	0.610577	0.389423	0	8218.64	0.244538	0.656181	0.0121178	2.74642	7.01383	6.75935	0
32	0	0.0526316	0.401914	0	0	8104.94	0.131684	3.53859	0.0313764	1.85645	3.39587	7.5468	0
32	0	0.0704225	0.276995	0.0328638	0.0140845	8104.42	0.0876956	3.1422	0.0425402	1.74421	3.64154	8.02581	0
33	0	0.0336538	0.456731	0.365385	0	8181.74	0.0515244	2.20686	0.0187156	1.56291	6.29133	7.16616	0
33	0	0.0236967	0.331754	0.473934	0	8184.26	0.0451492	2.18118	0.0290771	1.57879	6.38819	7.25739	0
33	0	0.0242718	0.514563	0.121359	0	8186.8	0.0493379	2.15771	0.0161961	1.33869	6.94249	7.88897	0
33	0	0.00480769	0.230769	0.740385	0	8185.14	0.0834787	2.23046	0.0395429	1.47468	6.44898	7.34254	0
33	0	0.0673077	0.524038	0.216346	0	8182.69	0.0487444	2.30982	0.0188971	1.18767	6.83075	7.80684	0
33	0	0.125604	0.507246	0.270531	0	8153.98	0.0790103	3.04538	0.015717	0.556345	6.44089	7.53707	0
33	0	0.0865385	0.375	0.403846	0	8146.42	0.0762105	3.21002	0.0221413	0.393407	6.31408	7.4466	0
33	0	0	1	0	0	8102.53	0.264196	2.45313	0	0.324574	3.92229	5.16544	0
33	0	0.0144231	0.975962	0.00961538	0	7995.97	0.200314	5.09911	0.000603865	0.291352	2.1247	2.96881	0
33	0	0	1	0	0	7995.44	0.274829	4.57149	0	0.307845	1.75461	2.31977	0.0028789
33	0	0	0.932692	0.0673077	0	7997.77	0.256228	4.18571	0.00229079	0.237559	1.53777	2.01273	0.0189245
33	0	0	0.990476	0.00952381	0	7976.5	0.37025	4.81105	0.000238095	0.413742	1.87376	2.77544	1.09245e-05
33	0.0821256	0	0.869565	0.0483092	0	7957.22	0.078124	4.96994	0.00393535	0.11271	2.02357	3.88739	0
33	0	0.0339806	0.912621	0.0533981	0	7949.07	0.147542	4.97383	0.0029344	0.291011	1.91282	3.42023	0
33	0.057971	0.0628019	0.763285	0	0.0144928	7968.5	0.0536356	5.15513	0.00794103	0.116646	2.36628	3.45071	0
33	0	0	1	0	0	7968.69	0.198955	5.13417	0.000120773	0.305923	2.03778	3.52789	0
33	0	0.0192308	0.908654	0.0721154	0	7967.07	0.0387752	5.32332	0.00292036	0.153777	2.31081	3.95126	0
33	0.149758	0.00483092	0.772947	0.0724638	0	7960	0.041039	5.09814	0.00909536	0.099057	2.18196	4.00602	0
33	0	0	1	0	0	7930.33	0.131982	2.97675	0	0.516428	1.8723	7.07447	0
33	0	0	0.421053	0.421053	0	8192.02	0.0640647	2.04655	0.0271354	1.74725	6.51402	7.34579	0
33	0	0	0.985646	0.0143541	0	8230.83	0.785664	0.782565	0.000362319	1.6012	4.29466	4.95793	0
33	0.0384615	0	0.918269	0.0432692	0	7966.47	0.0661895	5.13167	0.0023513	0.153368	2.14626	3.9043	0
33	0	0.0194175	0.917476	0.0631068	0	7971.37	0.0513921	5.35472	0.00257382	0.179623	2.30114	3.88713	0
33	0	0	0.980769	0.0192308	0	7996.76	0.203595	5.06296	0.000364078	0.237183	2.09522	2.81959	0
34	0	0	0.929577	0.0704225	0	7985.03	0.0771272	1.41001	0.00220322	1.5839	3.06032	7.49055	0
34	0	0	0.961538	0.0384615	0	8019.96	0.153641	1.40157	0.000956938	1.877	4.13931	6.46384	0
34	0	0.0380952	0.819048	0.142857	0	7950.13	0.0651787	1.68159	0.00446336	1.27993	3.19248	7.21882	0
34	0	0	0.913876	0.0861244	0	8050.54	0.260774	1.4026	0.00268631	2.23751	4.40249	6.1791	0
34	0	0	1	0	0	8142.59	0.234465	1.18432	0	4.02473	4.82879	4.80131	0
34	0	0	1	0	0	8127.01	0.242638	1.13546	0	4.05156	5.22128	5.18436	0
34	0	0	0.927885	0.0721154	0	8098.99	0.363909	1.74707	0.00166207	3.81823	4.22285	4.18248	0
34	0	0	0.870192	0.129808	0	8046.55	0.276482	1.62715	0.00323232	3.96628	3.44961	3.41319	0
34	0	0	1	0	0	8158.29	0.0765062	1.22769	0	4.0125	5.07257	5.0401	0
34	0	0	1	0	0	8157.25	0.207841	2.27188	0	1.32653	3.42034	4.72189	0
34	0	0	0.985577	0.0144231	0	8192.57	0.243553	2.09903	0.000358852	0.88702	0.140215	6.7527	0.386615
34	0	0	0.917476	0.0825243	0	8093.39	0.400114	1.84043	0.00173248	3.71098	4.20665	4.16528	0
34	0	0	0.918269	0.0817308	0	7968.67	0.0667004	2.64327	0.00291378	1.31155	4.14556	4.09031	0
34	0	0.0241546	0.676329	0.0628019	0	8165.35	0.0390723	2.13494	0.0123513	0.814177	0.269515	5.82557	0.273344
34	0	0	0.855072	0.144928	0	8241.11	0.104841	0.723305	0.00483425	3.47772	4.87379	3.04212	0
34	0	0	0.733333	0.266667	0	8211.34	0.472099	0.749052	0.00817297	1.55895	3.97904	9.91966	0
34	0.0193237	0.0772947	0.864734	0.0289855	0	8233.89	0.0775144	1.74897	0.00380491	0.108052	4.32946	5.20005	0
34	0	0	1	0	0	8472.48	0.327638	1.19175	0	2.06917	1.51073	8.77927	0.0183327
34	0.478469	0.0143541	0.368421	0.0861244	0.0143541	8337.8	0.0271272	4.31162	0.0508913	0.0510553	0.965943	5.84397	0.0983073
34	0	0.0576923	0.778846	0.110577	0	8379.58	0.0802999	1.89417	0.0071858	0.245207	1.09323	7.35546	0.117657
35	0.0338164	0.0338164	0.855072	0.0483092	0.0289855	8145.85	0.143843	3.6341	0.00600962	0.176275	9.00225	9.98566	0
35	0	0	0.985915	0.0140845	0	8156.87	0.167391	3.59808	0	0.239521	9.06547	10.0288	0
35	0	0	0.846154	0	0	8179.58	0.117734	3.08089	0.00512933	0.70328	9.11213	9.97929	0
35	0	0	0.980583	0.0194175	0	8185.89	0.0671996	2.51249	0.000469484	1.27196	8.90303	9.68099	0
35	0	0	1	0	0	8180.47	0.243596	3.26988	0	0.500981	9.34364	10.2238	0
35	0	0	0.947368	0	0	8171.39	0.166034	3.07181	0.00185267	0.825714	8.6613	9.55501	0
35	0.120773	0.0386473	0.768116	0.0386473	0.0289855	8148.29	0.147992	3.6196	0.0135075	0.143065	9.15098	10.1225	0
35	0	0.00480769	0.740385	0.221154	0	8214.7	0.0508755	1.96787	0.00692991	1.82848	7.48666	8.30815	0
35	0	0	1	0	0	8206.69	0.806836	0.797017	0	1.29731	3.89451	4.57135	0
35	0	0.00966184	0.94686	0.0434783	0	8040.59	0.232487	3.06855	0.00113698	0.216335	5.72915	5.85603	0
35	0	0	1	0	0	8394.51	0.108197	1.38212	0	1.06883	7.61571	8.39378	0
35	0	0.0528846	0.899038	0.0480769	0	8205.39	0.0750277	1.21071	0.00261106	2.45593	6.0883	6.22036	0
35	0.134615	0.00961538	0.822115	0.00961538	0.0240385	8199.33	0.0634394	4.8789	0.00948667	0.125266	1.22954	2.04965	0.171017
35	0.280193	0.111111	0.478261	0.115942	0.0144928	8180.34	0.108027	4.63519	0.0290727	0.0541021	0.971946	1.70958	0.265164
35	0.0619048	0.214286	0.566667	0.0238095	0.0238095	8238.17	0.0811591	2.45913	0.0168753	0.119659	1.26145	3.59698	0.0927577
35	0	0	1	0	0	8196.36	0.06353	5.94584	0	0.253594	0.507956	1.78564	0.23041
35	0	0	1	0	0	8255.59	0.437478	2.89459	0	0.509527	1.65641	3.03338	0.00675735
35	0	0	1	0	0	8417.64	0.169624	1.99809	0	1.4565	9.50886	10.0284	0
36	0	0	1	0	0	8134.31	0.0510398	2.41733	0	1.35496	4.95537	6.03483	0
36	0	0	1	0	0	8107.91	0.08104	2.87923	0	0.977609	4.60497	5.80185	0
36	0	0	1	0	0	8131.84	0.0598362	2.49158	0	1.31254	4.87769	5.97092	0
36	0	0.0234742	0.652582	0.267606	0	8128.21	0.113161	3.53516	0.0148578	0.301667	5.81387	7.06596	0
36	0	0	0.990431	0.00956938	0	8102.81	0.159228	3.15529	0.000360577	0.539442	4.38685	5.7082	0
36	0.163462	0.163462	0.432692	0.0288462	0.0769231	8104	0.0407304	2.89652	0.0280984	0.0830338	3.96661	5.46354	0
36	0.014218	0.109005	0.559242	0.104265	0.0379147	8107.33	0.0387805	2.92901	0.0148599	0.148071	3.97698	5.40246	0
36	0	0.0239234	0.76555	0.0813397	0	8103.84	0.0770922	2.30562	0.00720721	0.663878	3.85496	5.54127	0
36	0	0.0240385	0.9375	0	0	8111.08	0.0642488	2.13587	0.00157005	0.67893	3.82826	5.53314	0
36	0	0	1	0	0	8106.59	0.35334	4.2107	0	0.294887	0.87717	2.34603	0.162191
36	0.0526316	0.0191388	0.822967	0.105263	0	8082.26	0.131739	3.56958	0.0060043	0.167714	1.53508	2.96533	0.0733633
36	0	0	0.966667	0.0142857	0	8083.69	0.0761933	1.99241	0.000598086	0.230179	2.40687	4.11418	0
36	0.379808	0.129808	0.240385	0.153846	0.0384615	8062.54	0.177261	2.64054	0.0581816	0.0506243	2.136	3.76535	0
36	0.00961538	0.0673077	0.8125	0.0961538	0	8358.31	0.23721	1.84289	0.00512703	0.136865	0.688514	0.996745	0.984222
36	0	0.0917874	0.690821	0.198068	0	8338.88	0.621862	2.01333	0.011874	0.557152	0.810467	2.6694	0.205097
36	0	0	1	0	0	8290.34	0.428575	2.59974	0	0.440465	0.335549	1.54736	0.962131
36	0	0.00961538	0.980769	0.00961538	0	8265.53	0.403384	2.27203	0.00047619	0.397341	0.223893	1.63659	0.837941
37	0	0.0238095	0.680952	0.238095	0	8348.55	0.0295846	2.15589	0.0105657	1.2679	11.8101	14.2469	0
37	0	0.00952381	0.704762	0.233333	0	8350.26	0.0301582	2.16254	0.00921069	1.26326	11.8086	14.2598	0
37	0	0.00478469	0.933014	0.0526316	0	7950.92	0.119282	3.5548	0.00154762	0.582487	4.11568	4.35077	0
37	0	0.00480769	0.817308	0.177885	0	7964.42	0.0877245	2.79096	0.00671859	1.10791	4.26795	4.21978	0
37	0	0	0.904306	0.0956938	0	7977.56	0.0667489	2.61019	0.00239474	1.95084	3.82797	3.77454	0
37	0	0	0.73913	0.26087	0	7957.51	0.0692065	3.64762	0.00958453	0.927389	4.0873	4.67276	0
37	0	0.0192308	0.942308	0.0384615	0	7953.76	0.0982695	3.28812	0.00157005	0.780328	4.20952	4.34426	0
37	0	0	1	0	0	8051.93	0.122148	1.89712	0	1.50787	4.5346	5.38195	0
37	0	0	0.990291	0.00970874	0	8000.62	0.0547815	2.22018	0.000239234	2.22742	4.45777	4.40571	0
37	0	0	0.995192	0.00480769	0	8009.96	0.08715	2.17611	0.000120773	2.26472	4.53542	4.48346	0
37	0	0	0.927536	0.0724638	0	7974.6	0.0775856	4.59631	0.00248976	0.921463	3.76859	5.44665	0
37	0.591346	0.177885	0.0721154	0.0480769	0.0144231	7892.87	0.040952	3.54323	0.0864147	0.0152581	3.5004	5.36825	0
37	0	0	0.942029	0.057971	0	8006.07	0.0838352	3.83951	0.00162007	1.05498	4.08166	5.62587	0
37	0	0	0.85446	0.14554	0	7969.4	0.134599	2.82936	0.00607062	1.07501	4.20863	4.154	0
37	0	0.00956938	0.334928	0.655502	0	8507.66	0.266919	2.34457	0.0308608	1.18952	12.0171	14.8942	0
37	0	0.0287081	0.799043	0.138756	0	8371.48	0.0870768	2.20455	0.00457312	1.23202	11.8648	14.4318	0
37	0	0.0288462	0.778846	0.182692	0	8368.38	0.0609591	2.1798	0.0049069	1.29359	11.7869	14.3646	0
37	0	0	0.932367	0.0676329	0	7987.81	0.199525	2.98364	0.00174085	0.438775	3.69006	3.63675	0
38	0	0.0336538	0.456731	0.365385	0	8181.74	0.0515244	2.20686	0.0187156	1.56291	6.29133	7.16616	0
38	0	0.0285714	0.604762	0.209524	0	8187.04	0.0921681	2.15048	0.0139509	1.66928	6.25142	7.10102	0
38	0	0	0.252381	0.728571	0	8201.93	0.0794993	1.94598	0.0440986	1.8077	7.03653	7.87877	0
38	0	0.0190476	0.419048	0.371429	0	8187.35	0.0504038	2.13343	0.023557	1.65674	6.39864	7.24948	0
38	0	0.0631068	0.495146	0.165049	0	8184.87	0.0507599	2.2202	0.0187803	1.26926	6.88062	7.83966	0
38	0	0.110577	0.509615	0.350962	0	8164.56	0.0614451	2.78282	0.0171978	0.765561	6.55113	7.60528	0
38	0	0.157143	0.333333	0.428571	0	8159.15	0.0527444	2.89736	0.0246745	0.667139	6.39283	7.46517	0
38	0	0	0.884615	0.0865385	0	8208.8	0.0639238	1.96173	0.00294858	1.66007	7.49082	8.34849	0
38	0	0	0.904306	0.076555	0	8360.12	0.0857082	2.04029	0.00252889	1.81695	11.5965	12.9171	0
38	0	0	1	0	0	8293.81	0.225511	1.30006	0	1.95972	7.07467	7.09528	0
38	0	0	1	0	0	8294.05	0.0790885	1.27391	0	1.78238	6.99571	7.08691	0
38	0	0	1	0	0	8234.57	0.0757038	1.26192	0	2.37229	6.59696	6.58924	0
38	0	0.0144928	0.913043	0.0724638	0	8229.69	0.759743	1.32408	0.00201297	1.01083	3.76044	9.23439	0
38	0.0478469	0.440191	0.253589	0.0956938	0	8153.1	0.0551759	2.07986	0.0434751	0.124972	2.23846	7.56693	0
38	0	0.0144231	0.903846	0.0817308	0	8228.03	0.75243	1.30688	0.00202265	1.02052	3.7694	9.23663	0
38	0	0.0239234	0.961722	0.0143541	0	8567.2	0.0858809	1.38781	0.00101621	1.00566	5.1846	10.1119	0
38	0	0	0.990476	0.00952381	0	8433.39	0.130515	1.53264	0.000241546	1.12057	4.11962	11.3145	0
38	0.299517	0.120773	0.516908	0.0144928	0.00966184	8293.2	0.0769763	3.94157	0.0266638	0.0615021	0.876632	4.45342	0.110164
38	0	0	0.932692	0.0673077	0	8350.43	0.305444	1.41814	0.00120192	1.46945	2.52122	12.8329	0
38	0	0.0145631	0.907767	0.0776699	0	8458.8	0.365699	1.94837	0.00216346	0.63797	2.06778	8.20836	0
38	0	0	0.937198	0.0628019	0	8145.13	0.862206	0.662011	0.00117371	2.13646	0.132647	1.26938	3.02888
38	0	0	0.721154	0.240385	0	8118.19	0.549475	1.24912	0.00952553	3.11561	0.0379448	0.108601	4.24422
39	0	0	0.671429	0.328571	0	7988.47	0.0409394	2.51437	0.00996573	2.32857	3.7056	3.65398	0
39	0	0	0.528571	0.461905	0	8017.06	0.101291	2.30618	0.0204281	2.71765	3.72763	3.67863	0
39	0	0.0333333	0.504762	0.438095	0	7994.59	0.0385759	2.41155	0.0200639	2.54081	3.63276	3.58245	0
39	0	0	0.810427	0.189573	0	8021.56	0.117304	2.06977	0.00498804	1.99266	4.59319	4.54004	0
39	0	0	0.904306	0.0956938	0	8087.74	0.384871	1.70626	0.00236053	3.18343	2.47767	2.44747	0
39	0	0	0.889423	0.110577	0	8027.03	0.0726213	2.07928	0.00257799	2.98142	2.89889	2.85103	0
39	0	0	0.7343	0.2657	0	8058.87	0.225225	1.55343	0.00767943	3.44317	3.20797	3.18261	0
39	0	0	1	0	0	8158.29	0.0765062	1.22769	0	4.0125	5.07257	5.0401	0
39	0	0	0.956522	0.0434783	0	8093.41	0.296146	0.620293	0.00142169	1.41034	0.234624	0.451383	5.97754
39	0	0	0.942857	0.0571429	0	8049.61	0.0895731	2.01256	0.0015345	3.37673	2.61386	2.56992	0
39	0	0	0.990431	0.00956938	0	8040.51	0.0829416	1.99041	0.000238095	3.24636	2.68413	2.63871	0
39	0.225962	0.00480769	0.754808	0.0144231	0	8012.93	0.0552243	3.01245	0.0150353	0.106249	1.401	2.73006	0.0566533
39	0	0	0.980676	0.0193237	0	8170	0.766395	0.690261	0.000641495	2.4671	0.0801075	0.852273	4.66594
39	0.0619048	0.214286	0.566667	0.0238095	0.0238095	8238.17	0.0811591	2.45913	0.0168753	0.119659	1.26145	3.59698	0.0927577
39	0	0.0432692	0.875	0.0817308	0	8320.78	0.0809423	1.37492	0.00317872	0.378838	0.4408	2.36636	0.489756
39	0	0	0.995146	0.00485437	0	8324.81	0.345254	2.5018	0.000120192	0.484115	1.46893	3.34219	0.0429414
39	0	0	1	0	0	8307.81	0.108573	2.25469	0	0.626822	1.25707	3.05841	0.0671127
39	0	0.0776699	0.786408	0.0970874	0	8242.91	0.0577523	2.16171	0.00589796	0.378076	0.995816	3.35654	0.196829
39	0	0	0.870192	0.129808	0	8330.26	0.133534	1.26852	0.00308425	0.852614	0.261262	11.0628	0.0369004
39	0	0	1	0	0	8255.96	0.376351	2.17169	0	0.452469	1.40434	6.70084	0.0905126
42	0	0	0.966346	0.0336538	0	8363.51	0.663034	0.997938	0.0011425	0.573905	0.0649459	2.13871	0.656092
42	0	0.0240385	0.860577	0.0817308	0	8343.36	0.443769	0.990087	0.00358515	0.409778	0.188029	2.0036	0.700347
42	0	0.0769231	0.649038	0.274038	0	8337	0.397754	1.19923	0.011967	0.316457	0.0821551	1.76015	0.799621
42	0	0.0384615	0.692308	0.269231	0	8287.52	0.283327	1.88228	0.0139861	0.448276	1.34451	1.74423	0.248201
42	0.222222	0.256039	0.328502	0.178744	0.0144928	8222.1	0.213376	2.63046	0.0433661	0.0442985	0.357257	0.6362	3.71073
42	0	0	0.615385	0.384615	0	8426.84	0.56852	1.24489	0.0151861	0.664129	1.02806	1.55851	0.477489
42	0.567308	0.0721154	0.274038	0.0673077	0.00961538	8107.15	0.366999	2.87937	0.0394127	0.023847	3.04503	4.03209	0
42	0	0.014218	0.815166	0.156398	0	8110.72	0.152705	2.81972	0.00573653	0.184367	3.30603	3.99262	0
42	0.507246	0.0483092	0.120773	0.294686	0.0289855	8108.05	0.0969863	2.72231	0.111921	0.0350673	3.50672	4.10654	0
42	0.0758294	0.028436	0.696682	0.175355	0.0236967	8097.88	0.316429	2.47988	0.0133716	0.143307	3.74578	4.40209	0
42	0.673077	0.0528846	0.197115	0.0769231	0	8074.27	0.0880694	2.13024	0.0805083	0.0153779	4.39186	4.9847	0
42	0	0	1	0	0	8092.62	0.252866	1.68289	0	3.20583	6.22814	7.33442	0
42	0	0	0.971429	0.0190476	0	8116.12	0.136563	1.2769	0.000653891	3.33867	6.3794	7.61543	0
42	0	0	1	0	0	8114.79	0.185343	1.31818	0	3.34029	6.37886	7.59098	0
42	0.0865385	0.269231	0.576923	0.00961538	0	8152.82	0.107067	2.73299	0.0222162	0.132944	1.82052	6.55215	0.00128213
42	0	0	1	0	0	8177.88	0.409091	2.89588	0	0.338909	2.59157	5.8895	0
42	0	0	1	0	0	8196.24	0.436624	2.5962	0	0.241081	2.87284	6.3631	0
42	0	0	1	0	0	8232.08	0.450263	1.74445	0	1.02334	3.38165	8.67943	0
42	0.365385	0.0576923	0.293269	0.115385	0.0288462	8158.8	0.4011	1.79853	0.0713827	0.0419874	3.1034	7.96789	0
42	0	0.0145631	0.961165	0.0242718	0	8231.64	0.340467	2.70163	0.000961538	0.334085	1.4245	6.21624	0.120172
42	0	0.00947867	0.909953	0.0805687	0	8281.08	0.638936	1.23889	0.00250342	1.83866	0.165872	0.864719	1.10406
42	0	0	1	0	0	8208.59	0.268758	3.56102	0	0.615953	0.56483	0.698658	0.339549
42	0	0.00966184	0.78744	0.0966184	0	8077.26	0.116635	4.9657	0.00584101	0.469442	3.54601	4.31469	0
42	0.456731	0.0336538	0.403846	0.105769	0	8267.98	0.0482296	2.59779	0.0487798	0.0340068	0.0749996	0.218966	4.0027
42	0.42029	0.0483092	0.425121	0.10628	0	8270.29	0.0464201	2.60382	0.0396067	0.0363337	0.0715935	0.236591	3.99989
43	0.509615	0.0576923	0.360577	0.0336538	0	8109.14	0.181945	2.93624	0.0104594	0.0335341	3.08786	3.90937	0
43	0.0289855	0.0483092	0.628019	0.294686	0	8114.72	0.0539111	2.9016	0.0194848	0.145569	3.2391	3.86846	0
43	0.430622	0.0334928	0.416268	0.100478	0	8068.09	0.0683047	2.06927	0.04159	0.0400518	4.16596	4.85026	0
43	0.679426	0.0717703	0.119617	0.110048	0	8069.49	0.0790586	2.01932	0.0744732	0.0113534	4.26988	4.90809	0
43	0	0.00483092	0.980676	0.00966184	0	8148.63	0.115859	3.23236	0.000483092	0.212093	2.71275	3.35395	0
43	0.0432692	0	0.913462	0.0240385	0	8161.96	0.131331	3.2638	0.00217174	0.15436	2.63277	3.22195	0
43	0	0.0194175	0.956311	0.0145631	0	8155.87	0.146514	3.28729	0.00113698	0.178763	2.71684	3.29406	0
43	0.690476	0.0666667	0.114286	0.109524	0	8071.48	0.0900788	2.03803	0.0786954	0.011012	4.25684	4.8867	0
43	0	0.014218	0.815166	0.156398	0	8110.72	0.152705	2.81972	0.00573653	0.184367	3.30603	3.99262	0
43	0.507246	0.0483092	0.120773	0.294686	0.0289855	8108.05	0.0969863	2.72231	0.111921	0.0350673	3.50672	4.10654	0
43	0.652174	0.0483092	0.178744	0.101449	0	8074.57	0.109588	2.07434	0.0777373	0.0153003	4.20481	4.8315	0
43	0.673077	0.0528846	0.197115	0.0769231	0	8074.27	0.0880694	2.13024	0.0805083	0.0153779	4.39186	4.9847	0
43	0.399038	0.0192308	0.471154	0.00961538	0	8114.67	0.0620789	3.05518	0.00672759	0.0554627	2.932	3.72674	0
43	0.237864	0.0436893	0.271845	0	0	8122.06	0.0403897	2.86773	0.0466847	0.0997056	2.42088	3.49223	0
43	0	0.0238095	0.742857	0.0857143	0	8178.2	0.0920276	1.8522	0.00757633	0.878971	0.123353	5.9385	0.293408
43	0	0	0.879808	0.0913462	0	8357.58	0.103909	1.47321	0.00337393	1.34547	3.4408	12.6361	0
43	0	0	0.894231	0.105769	0	8162.55	0.287438	0.730476	0.00236053	1.94666	5.53502	4.04187	0
43	0	0	0.740385	0.25	0	8173.77	0.241751	1.00771	0.00982412	2.29402	7.95158	7.91946	0
43	0	0.0193237	0.811594	0.154589	0	8115.42	0.0547923	2.95276	0.00572121	0.185463	3.18295	3.83696	0
43	0.401914	0.0478469	0.296651	0.253589	0	8113.05	0.0564984	2.83425	0.0827437	0.0577724	3.33987	3.92927	0
44	0.105769	0.0384615	0.841346	0.00961538	0	8306.99	0.0706217	4.1133	0.00729651	0.146618	1.94172	5.56265	0
44	0	0	1	0	0	8386.17	0.309505	2.04558	0	1.17107	0.877147	6.68676	0.0938817
44	0	0	1	0	0	8407.16	0.239483	1.48226	0	1.19168	1.37194	7.43771	0.0480628
44	0	0	1	0	0	8396.96	0.186637	1.50128	0	1.23914	1.0469	7.13826	0.0860719
44	0	0.0970874	0.859223	0.0436893	0	8236.01	0.0400567	3.00761	0.00400677	0.619698	1.95556	4.58985	0
44	0	0	0.990385	0.00961538	0	8304.66	0.484172	3.61864	0.000242718	0.510882	1.83572	3.07174	0.000858409
44	0.0673077	0.0673077	0.778846	0.0865385	0	8286.65	0.28442	3.35932	0.0111138	0.127944	0.44331	3.85365	0.0747783
44	0.0288462	0	0.951923	0.0192308	0	8263.33	0.147671	3.31912	0.00107141	0.184061	1.64412	2.60076	0.0341618
44	0	0	0.990385	0.00961538	0	8357.56	0.0710914	4.14002	0.000240385	0.327154	1.46586	6.01121	0.0259364
44	0	0	0.927885	0.0673077	0	8364.63	0.15297	2.86203	0.00191388	0.264472	1.03726	4.88492	0.137976
44	0.0339806	0.0533981	0.834951	0.0776699	0	8286.96	0.275852	3.35322	0.00708338	0.137691	0.478613	3.87944	0.0747783
44	0.139423	0.115385	0.605769	0.139423	0	8277.02	0.0464478	3.8571	0.0196832	0.116536	0.348916	4.02822	0.0747783
44	0.22488	0.138756	0.631579	0.00478469	0	8282	0.0824204	3.66394	0.0200023	0.0962763	0.498056	4.09704	0.0747783
44	0	0	0.971292	0.0287081	0	8335.5	0.0759333	1.16578	0.000714286	1.74208	2.86408	12.7425	0
44	0	0.0145631	0.961165	0.0242718	0	8231.64	0.340467	2.70163	0.000961538	0.334085	1.4245	6.21624	0.120172
44	0	0	1	0	0	8185.47	0.315646	1.24025	0	2.02604	0.278091	0.312475	1.84986
44	0	0.00966184	0.985507	0.00483092	0	8245.65	0.536595	1.31879	0.000240385	2.03218	0.307463	0.688491	1.28491
44	0	0	0.966019	0.0339806	0	8222.03	0.256568	0.88784	0.000721154	0.753882	0.287857	1.42012	1.4359
44	0	0	0.846154	0.134615	0	8331.76	0.365734	1.25911	0.00382553	2.4243	0.413628	2.33912	1.37321
44	0	0	0.961353	0.0386473	0	8289.51	0.196704	1.48512	0.000961538	2.18343	0.518817	1.10339	0.668188
47	0.272727	0.076555	0.578947	0.0717703	0	8591.76	0.514856	1.23916	0.010886	0.0567715	0.45056	3.91581	0.150737
47	0.217391	0.0676329	0.661836	0.0531401	0	8621.76	0.585917	1.09708	0.00773805	0.0702494	0.163201	4.13569	0.150737
47	0	0	1	0	0	8640.79	0.241783	0.890117	0	0.246825	0.118455	4.43056	0.150656
47	0	0.0193237	0.971014	0.00966184	0	8641.36	0.234805	1.12141	0.000528016	0.734681	0.500696	4.39393	0.148328
47	0.0239234	0	0.84689	0.119617	0	8423.32	0.0583962	1.61625	0.00377327	0.197781	0.749456	6.39	0.117542
47	0	0	0.846154	0.144231	0	8436.03	0.205031	1.64865	0.00438434	0.453656	0.706136	5.93016	0.183265
47	0.0334928	0.00478469	0.837321	0.114833	0	8422.72	0.0562239	1.61962	0.00440587	0.172274	0.789415	6.4099	0.112715
47	0	0.0190476	0.747619	0.185714	0	8379.18	0.403328	1.21063	0.00857399	0.981828	1.1237	7.59694	0.0674135
47	0	0.00478469	0.91866	0.0239234	0	8122.79	0.0989466	3.76503	0.002172	0.887041	2.39047	6.9435	0
47	0	0.0628019	0.879227	0.0289855	0	8174.17	0.0731788	2.36566	0.00337935	0.915609	2.7339	8.77589	0
47	0	0	0.698565	0.301435	0	8113.81	0.116368	2.3094	0.0101085	2.30122	4.41766	7.61863	0
47	0	0	0.895238	0.0238095	0	8181.72	0.0836721	1.9649	0.00244189	1.39001	1.09662	4.63586	0.0699101
47	0.134615	0.00961538	0.822115	0.00961538	0.0240385	8199.33	0.0634394	4.8789	0.00948667	0.125266	1.22954	2.04965	0.171017
47	0	0	1	0	0	8249.69	0.373932	1.59218	0	1.30729	2.10885	8.88431	0
47	0	0	1	0	0	8236.52	0.390061	3.19971	0	0.961039	1.07096	1.18662	0.299523
47	0	0.0772947	0.618357	0.0869565	0	8142.57	0.0344552	2.61149	0.0123371	1.02828	1.09186	8.69182	0.131688
47	0	0	0.733333	0.266667	0	8211.34	0.472099	0.749052	0.00817297	1.55895	3.97904	9.91966	0
47	0	0	1	0	0	8401.13	0.204207	1.82718	0	0.71025	3.62604	11.7385	0
47	0.0240385	0.120192	0.543269	0.3125	0	8515.56	0.0943194	2.1039	0.0171149	0.148673	3.28529	12.7697	0
47	0	0.0187793	0.84507	0.00938967	0	8172.12	0.0859355	2.18762	0.00583387	0.879295	0.306049	5.69075	0.252255
47	0	0	0.808612	0.0956938	0	8186.01	0.365179	1.8887	0.00462403	1.60459	0.555413	4.92746	0.133186
47	0	0.0240385	0.432692	0	0.0144231	8105.02	0.0510538	3.00861	0.0297092	1.57666	3.61426	8.40058	0
49	0	0	1	0	0	8386.99	0.24865	2.29384	0	0.557843	1.42202	6.55049	0.03021
49	0	0.0239234	0.870813	0.0909091	0	8328.26	0.0777611	2.52534	0.00338264	0.85969	0.997272	6.10747	0.0811666
49	0	0.0192308	0.932692	0.0480769	0	8381.64	0.142892	2.13151	0.00155502	0.694191	1.37273	6.70225	0.0362382
49	0	0.0191388	0.899522	0.0813397	0	8401.28	0.10926	1.70313	0.00244189	1.18743	1.48686	7.30391	0.0272974
49	0	0	1	0	0	8385.74	0.292208	2.04992	0	1.14663	0.910445	6.68734	0.0899405
49	0	0.00952381	0.904762	0.0857143	0	8352.56	0.0827933	1.89179	0.00212243	1.42997	0.349647	6.46209	0.127498
49	0	0	1	0	0	8384.82	0.198358	1.72954	0	1.32558	0.668975	6.76003	0.119449
49	0	0	1	0	0	8524.58	0.21254	0.886777	0	1.12234	2.0042	7.38535	0
49	0	0	1	0	0	8478.41	0.357844	0.818586	0	1.09917	1.38564	8.52994	0.0111716
49	0	0	1	0	0	8358.37	0.107597	4.04812	0	0.359609	1.43693	6.19184	0.0286403
49	0.00480769	0.0865385	0.831731	0.0673077	0	8340.13	0.113399	3.76104	0.00785489	0.200815	1.60971	6.35083	0.0100937
49	0.0192308	0.0913462	0.778846	0.0432692	0	8330.32	0.331444	1.9756	0.0131349	0.137787	1.25943	7.71609	0.214045
49	0	0.0913462	0.817308	0.0817308	0	8510.25	0.195473	1.84306	0.00743147	0.313863	0.920664	3.45163	0.255736
49	0	0.0191388	0.698565	0.282297	0	8359.3	0.113435	2.97278	0.00780042	0.24735	1.94331	6.83187	0
49	0	0.0528846	0.716346	0.230769	0	8419.79	0.132012	1.45695	0.010565	1.48767	2.18242	8.24638	0
49	0	0	0.9375	0.0625	0	8377.01	0.41504	2.07529	0.00135883	0.270525	1.22585	9.20587	0.0196639
49	0	0	0.942308	0.0576923	0	8378.05	0.415655	2.07555	0.00125776	0.270908	1.24065	9.19088	0.0197308
49	0	0.0432692	0.927885	0.0288462	0	8406.25	0.0935321	1.62947	0.00183503	1.30681	1.66478	7.53601	0.00830684
49	0	0.00961538	0.918269	0.0721154	0	8351.09	0.0823058	1.90131	0.00188434	1.44134	0.32513	6.43851	0.127498
49	0	0.00480769	0.995192	0	0	8412.98	0.0799914	1.49838	0.000119617	1.35972	1.80831	7.75334	0.000893865
50	0.389423	0.0913462	0.447115	0.0721154	0	8298.13	0.0401187	3.79207	0.026025	0.0499357	1.93011	5.78443	0
50	0.22488	0.5311	0.119617	0.124402	0	8328.88	0.19795	2.15966	0.0759265	0.099186	0.207347	8.97159	0.429942
50	0	0	1	0	0	8344.25	0.341872	2.28685	0	0.51025	0.59163	7.46823	0.35223
50	0	0.0142857	0.985714	0	0	8344.62	0.129695	2.21233	0.000239234	0.464514	0.653446	7.24229	0.319671
50	0	0	1	0	0	8366.3	0.246428	2.12098	0	0.788109	0.633251	7.11472	0.24271
50	0	0.0574163	0.866029	0.076555	0	8355.33	0.0879381	1.88227	0.00324519	0.932907	0.261872	6.75325	0.174163
50	0	0	1	0	0	8369.27	0.259445	1.77168	0	1.11462	0.247686	6.69463	0.127498
50	0	0.0143541	0.976077	0.00956938	0	8367.27	0.295783	1.87015	0.000480769	1.19762	0.0950721	6.51432	0.127498
50	0	0.00480769	0.942308	0.0528846	0	8351.78	0.249325	1.95924	0.00131579	0.982267	0.145995	6.33636	0.127498
50	0	0	0.971154	0.0288462	0	8305.47	0.184044	2.07618	0.000724638	0.872894	0.342754	6.12813	0.127498
50	0	0	0.980676	0.0193237	0	8241.81	0.106069	1.70118	0.000600962	0.391085	0.501438	6.2002	0.137858
50	0	0.0143541	0.947368	0.0382775	0	8355.21	0.351684	1.97677	0.00107656	1.24034	0.246423	6.18983	0.127498
52	0.25	0.201923	0.413462	0.0576923	0.0192308	8287.78	0.0434745	3.78184	0.0294686	0.0624136	0.819457	4.31548	0.0959275
52	0.12381	0.4	0.3	0.0428571	0.0571429	8308.51	0.0783854	2.39011	0.0631884	0.0687112	1.42273	4.33782	0.111917
52	0.0144231	0.125	0.610577	0.120192	0.0721154	8317.19	0.0774582	2.04646	0.0145571	0.129273	1.53385	4.57964	0.0577605
52	0.00966184	0.057971	0.78744	0.111111	0.0338164	8321.22	0.246959	1.59125	0.0069548	0.143088	1.74696	4.38588	0.00367497
52	0.530806	0.109005	0.279621	0.0805687	0	8379.64	0.0633569	1.75947	0.0910434	0.0321642	1.30604	5.65275	0.20152
52	0	0.0917874	0.565217	0.31401	0	8344.36	0.417195	2.70979	0.0132732	0.33086	0.884857	5.11662	0.160474
52	0	0	1	0	0	8358.46	0.137178	4.01518	0	0.360226	1.39717	6.26758	0.0332093
52	0	0	1	0	0	8358.37	0.107597	4.04812	0	0.359609	1.43693	6.19184	0.0286403
52	0	0	0.966346	0.0144231	0	8390.25	0.169637	3.40921	0.000650747	0.612246	1.19117	6.88743	0.129848
52	0	0	0.980676	0	0	8397.99	0.245386	2.81911	0.000362319	0.64088	1.47755	7.25633	0.0630196
52	0.430622	0.287081	0.210526	0.0669856	0	8301.57	0.0965161	3.7445	0.0547628	0.0315809	1.12834	4.82966	0.158056
52	0	0	0.927885	0.0673077	0	8364.63	0.15297	2.86203	0.00191388	0.264472	1.03726	4.88492	0.137976
52	0.341346	0.240385	0.341346	0.0384615	0	8310.25	0.0913905	3.50886	0.0508178	0.0544153	1.13114	4.788	0.162769
52	0	0	0.990385	0.00961538	0	8365.95	0.254273	1.60612	0.000120192	0.452805	0.180005	8.35613	0.0582164
52	0	0.0628019	0.183575	0.371981	0.0193237	8298.36	0.0490639	2.44714	0.042625	0.215949	0.0750521	8.4514	0.374558
52	0.052381	0.209524	0.533333	0.190476	0.0142857	8308.8	0.111405	2.18558	0.0185553	0.115518	0.252563	8.64903	0.419987
52	0	0.0432692	0.927885	0.0288462	0	8406.25	0.0935321	1.62947	0.00183503	1.30681	1.66478	7.53601	0.00830684
53	0.0240385	0.158654	0.360577	0.456731	0	8367.25	0.48604	1.72867	0.0314139	0.151572	0.270679	2.17739	0.467205
53	0	0	0.842857	0.157143	0	8381.01	0.82685	1.10501	0.00419555	0.503456	0.0720576	2.37864	0.585679
53	0.0144231	0.1875	0.298077	0.5	0	8360.1	0.478602	1.74667	0.039292	0.179641	0.235499	2.122	0.475854
53	0.203791	0.208531	0.582938	0	0.00473934	8256.68	0.0938281	1.90072	0.028567	0.0874778	0.0750226	0.628498	3.41986
53	0	0	1	0	0	8208.78	0.307995	1.99549	0	1.05014	0.226064	7.73527	0.293491
53	0	0.0861244	0.655502	0.15311	0	8233.75	0.214378	1.77766	0.0110204	1.38138	0.393545	7.27969	0.338337
53	0	0.0865385	0.697115	0.0769231	0	8124.47	0.0728383	3.48278	0.0101257	0.545511	1.49747	7.80377	0.143523
53	0	0	0.860577	0.139423	0	8108.89	0.092391	2.41452	0.00368472	2.08676	4.19503	7.39542	0
53	0	0.0817308	0.725962	0.0384615	0	8122.72	0.0741395	3.784	0.0132974	0.986582	2.47475	6.97093	0
53	0	0	0.933014	0.0239234	0	8156.76	0.133164	2.78348	0.00215319	0.447824	0.593849	6.85491	0.38231
53	0	0.0144928	0.797101	0.057971	0	8114.5	0.158584	3.27567	0.00613402	0.524911	2.90745	5.56447	0
53	0.609524	0.119048	0.0714286	0.2	0	8286.86	0.134266	3.41752	0.155782	0.0314512	0.305465	6.77328	0.210456
53	0.903846	0.0817308	0	0.0144231	0	8279.64	0.214772	3.50971	0.219717	0.00345905	0.301235	6.55987	0.241939
54	0	0	1	0	0	8115.8	0.214988	2.12667	0	0.503068	0.353251	2.11084	0.166169
54	0	0	0.902913	0.0873786	0	8120.38	0.200127	2.092	0.0029344	0.658869	0.303774	1.96281	0.185754
54	0	0	0.806763	0.130435	0	8115.81	0.0817408	1.66818	0.00505662	0.493226	0.519822	1.78418	0.221865
54	0	0	0.84689	0.143541	0	8123.98	0.206382	2.19117	0.00367005	0.786165	0.594937	1.95597	0.19052
54	0	0.00961538	0.966346	0.0240385	0	8097.34	0.167411	2.63568	0.00110031	0.309621	0.886728	2.4906	0.117071
54	0	0	0.723301	0.145631	0	8104.18	0.072146	1.80346	0.00738356	0.470671	0.219005	1.82918	0.20903
54	0	0	0.985577	0.0144231	0	8115.11	0.0534693	2.31011	0.00035545	0.509682	0.555888	2.16949	0.163115
54	0	0.00483092	0.714976	0.00966184	0	8064.26	0.171356	4.14059	0.00694692	0.240286	1.87033	3.39735	1.03343e-06
54	0	0.076555	0.880383	0.0239234	0	8065.23	0.233524	3.5289	0.00357751	0.299785	1.54789	3.07558	0.0217967
54	0.0576923	0.0480769	0.644231	0.0625	0.0240385	8249.3	0.0534844	1.99884	0.0181191	0.110398	2.80941	4.57861	0
54	0	0	0.883495	0.116505	0	8241.7	0.177779	1.92982	0.00308952	0.276067	3.24035	4.93622	0
54	0.00952381	0.0333333	0.938095	0	0	8278.18	0.132799	1.68916	0.00165739	0.162945	3.02035	4.73238	0
54	0	0	0.904306	0.0956938	0	8214.89	0.115771	2.09386	0.00259053	0.362594	0.108074	0.903106	1.28606
54	0	0	1	0	0	8280.91	0.382836	2.98866	0	0.553092	0.237738	1.08757	1.14781
55	0	0.271845	0.441748	0.257282	0.00970874	8519.66	0.238306	1.8215	0.0228439	0.447932	5.49028	8.33335	0
55	0	0.173913	0.101449	0.724638	0	8566.27	0.16808	1.74173	0.0799198	0.853131	6.05935	9.39453	0
55	0	0.194175	0.140777	0.665049	0	8566.38	0.28731	1.83533	0.0752024	0.996194	5.92017	9.23612	0
55	0	0.0331754	0.123223	0.843602	0	8575.85	0.263032	1.54065	0.0494802	0.924838	6.05725	9.53572	0
55	0	0	0.885167	0.114833	0	8206.83	0.0649454	2.48106	0.00286399	0.856629	1.71768	4.76558	0.0326815
55	0	0.0145631	0.975728	0.00970874	0	8368.16	0.384347	1.52408	0.000480769	0.398121	2.99188	7.00773	0
55	0	0	0.861244	0.138756	0	8285.36	0.280536	2.1184	0.00381494	0.267828	0.860381	6.60894	0.228709
55	0	0	0.985507	0.0144928	0	8279.33	0.299862	2.02845	0.000357143	0.513857	1.02396	6.49078	0.197684
55	0	0.120192	0.711538	0.129808	0	8172.33	0.14931	2.16446	0.0103068	0.249614	2.08988	7.54935	0
55	0.134615	0.00961538	0.822115	0.00961538	0.0240385	8199.33	0.0634394	4.8789	0.00948667	0.125266	1.22954	2.04965	0.171017
55	0.215311	0.129187	0.569378	0.0143541	0.0191388	8154.82	0.039274	2.46191	0.0233597	0.074519	2.45553	7.50981	0
55	0	0	0.990385	0.00961538	0	8191.63	0.111252	1.98427	0.000241546	0.349136	2.74784	7.9166	0
55	0	0	0.94686	0.0531401	0	8218.25	0.276781	2.29134	0.0013285	0.272305	1.71521	6.91905	0.0052575
55	0.0865385	0.269231	0.576923	0.00961538	0	8152.82	0.107067	2.73299	0.0222162	0.132944	1.82052	6.55215	0.00128213
55	0.0143541	0.0861244	0.712919	0.186603	0	8225.58	0.0769052	1.82708	0.00884996	0.190307	3.45198	10.7935	0
55	0	0	0.971292	0.0287081	0	8336.9	0.0768089	1.16588	0.000714286	1.74878	2.88459	12.7414	0
55	0	0	0.990338	0.00966184	0	8332.61	0.320256	1.41011	0.000240385	1.09978	1.36203	9.87944	0.0179575
55	0	0.0666667	0.790476	0.0809524	0	8188.13	0.109363	1.73378	0.00940483	0.247289	4.44455	7.2475	0
55	0	0.0434783	0.115942	0	0	8105.43	0.0657349	2.98068	0.057679	1.61541	3.85489	8.39861	0
55	0	0	0.679612	0.320388	0	8147.63	0.162648	2.95328	0.00935884	0.701843	0.774264	7.31341	0.337651
55	0	0.105769	0.653846	0.240385	0	8349.51	0.487963	0.509969	0.0109808	2.69677	1.42198	3.93577	0.0456603
55	0	0.0187793	0.981221	0	0	8284.85	0.207045	1.73511	0.000241546	0.318449	0.436083	5.9666	0.309886
55	0	0	0.908654	0.0913462	0	8335.51	0.236382	1.41087	0.00169082	1.49852	2.49518	12.7508	0
56	0.1875	0	0.788462	0.0240385	0	8182.41	0.093214	3.1403	0.00969883	0.117521	0.0605864	0.401362	1.60984
56	0.110048	0.0574163	0.760766	0.0717703	0	8191.48	0.0482937	3.18544	0.00900409	0.142554	0.0635901	0.335653	1.56277
56	0.106796	0	0.854369	0.038835	0	8208.22	0.0793984	3.26768	0.00470763	0.139708	0.0869117	0.400837	1.45745
56	0	0	0.990385	0.00961538	0	8211.64	0.272	2.14384	0.000240385	0.317441	0.791257	1.81333	0.612193
56	0.349515	0.228155	0.203883	0.199029	0.0194175	8135.68	0.100092	3.75142	0.0619577	0.0292342	0.671732	0.678983	0.759501
56	0.0917874	0.0483092	0.792271	0.0531401	0	8114.25	0.394661	2.66931	0.00693079	0.145268	2.56645	1.68924	0.056677
56	0	0	0.918269	0.0817308	0	8169.51	0.302565	1.31583	0.00202265	1.39543	3.27892	2.695	0
56	0	0.0817308	0.725962	0.0384615	0	8122.72	0.0741395	3.784	0.0132974	0.986582	2.47475	6.97093	0
56	0	0	0.933014	0.0239234	0	8156.76	0.133164	2.78348	0.00215319	0.447824	0.593849	6.85491	0.38231
56	0	0	0.847619	0.152381	0	8133.57	0.291584	1.03462	0.00394572	2.14193	3.48867	4.14269	0
56	0	0.057971	0.811594	0.130435	0	8274.03	0.166186	1.39977	0.00788792	1.58362	0.535383	6.54027	0.339863
56	0	0.0144928	0.821256	0.0531401	0	8122.59	0.249001	3.30375	0.00535454	0.392929	2.40815	8.24487	0
56	0	0.0434783	0.275362	0	0	8109.68	0.0992961	2.91984	0.0422706	1.453	3.99915	8.52181	0
56	0	0.0428571	0.761905	0.0714286	0	8143.91	0.121967	2.60164	0.00992234	0.845575	1.49398	8.60766	0.0815242
56	0	0.0434783	0.705314	0.144928	0	8165.28	0.100265	2.45423	0.00874134	0.801626	2.1058	8.85775	0
57	0	0.00485437	0.640777	0.26699	0	8268.54	1.01465	0.303945	0.0161299	1.72575	0.123714	0.91808	1.55926
57	0	0	0.381643	0.381643	0	8275.89	0.939071	0.345233	0.0273922	1.82275	0.14679	0.760319	1.57947
57	0	0	0.865385	0.105769	0	8239.93	0.718293	0.528463	0.00558518	1.45709	0.19466	0.917387	1.42929
57	0	0	0.932692	0.0673077	0	8247.29	0.409951	0.624071	0.00144231	1.36636	0.0634755	0.37815	1.68245
57	0	0	0.837321	0.124402	0	8233.04	0.395199	0.710743	0.0047796	1.18239	0.100092	0.394705	1.73398
57	0	0	0.649038	0.245192	0	8259.43	0.727331	0.403828	0.0117351	1.72111	0.232989	0.637657	1.50408
57	0	0	0.779904	0.220096	0	8204.48	0.284435	0.960665	0.00732149	1.16487	0.0662153	0.818371	1.38757
57	0	0	0.971154	0.0288462	0	8255.42	0.225573	1.61925	0.000600962	0.649645	0.520611	1.84875	0.662606
57	0	0	1	0	0	8303.95	0.481776	1.22137	0	1.12673	0.102832	1.82065	0.919722
57	0	0	0.932692	0.0625	0	8249.78	0.517458	1.72329	0.0014993	0.516522	0.408244	1.42021	1.02072
57	0	0	0.985577	0.0144231	0	8238.37	0.221642	2.50516	0.000362319	0.930896	0.317462	0.579266	1.3974
57	0.216346	0.0625	0.485577	0.206731	0.00961538	8148.41	0.103321	3.48239	0.0215444	0.0896537	1.26682	1.43598	0.206092
57	0	0	0.502415	0.497585	0	8182.64	0.0854876	2.13369	0.0235161	0.697266	3.93769	3.31809	0
58	0	0.276699	0.475728	0.208738	0	8450.33	0.0976838	1.76529	0.0232683	0.257777	1.24941	3.93007	0.135887
58	0	0.213592	0.524272	0.184466	0	8441.88	0.0521663	1.5159	0.0173588	0.372387	1.15525	3.95619	0.15426
58	0	0.0761905	0.795238	0.12381	0.0047619	8590.42	0.505143	1.80277	0.00986478	0.568369	1.82242	4.70203	0.00130734
58	0	0.487923	0.21256	0.183575	0.00966184	8542.66	0.588617	1.85617	0.0634029	0.573825	1.76854	4.23552	0.00589952
58	0	0.0193237	0.961353	0.0193237	0	8603.21	0.461776	1.77719	0.000886868	0.643101	1.71723	4.53957	0.0149291
58	0	0.265403	0.383886	0.350711	0	8376.6	0.348222	2.04067	0.0232872	0.520863	1.76615	3.7815	0.00235527
58	0	0.0574163	0.578947	0.363636	0	8337.26	0.0456333	3.54922	0.0147311	0.447373	1.70118	2.07583	0.00439634
58	0	0	1	0	0	8381.62	0.907607	0.332551	0	1.59678	0.247075	0.664824	1.41319
58	0	0	1	0	0	8106.59	0.35334	4.2107	0	0.294887	0.87717	2.34603	0.162191
58	0.0287081	0.00956938	0.91866	0.0430622	0	8181.02	0.262344	2.12871	0.00217121	0.147455	1.99892	3.88577	0
58	0	0.0144231	0.836538	0.149038	0	8144.33	0.107207	1.50033	0.00422444	0.473341	3.80697	5.39107	0
58	0	0	0.990385	0.00961538	0	8244.71	0.474417	1.29701	0.000240385	0.997628	4.30845	5.56016	0
58	0	0	0.884615	0.115385	0	8306.6	0.246419	0.888436	0.00270703	2.20343	1.23438	6.03275	0.214214
58	0	0.0193237	0.951691	0.0289855	0	8233.89	0.0782099	1.28229	0.00129527	1.37409	3.89101	4.56288	0
58	0	0.0917874	0.690821	0.198068	0	8338.88	0.621862	2.01333	0.011874	0.557152	0.810467	2.6694	0.205097
58	0	0	1	0	0	8290.34	0.428575	2.59974	0	0.440465	0.335549	1.54736	0.962131
58	0	0.0772947	0.884058	0.0386473	0	8294.97	0.50533	2.38907	0.00331048	0.521397	0.361439	1.6623	0.869944
58	0	0.0616114	0.890995	0.0473934	0	8285.06	0.143644	3.50645	0.00266836	0.257598	1.89933	3.76331	0
58	0	0	0.980861	0.0191388	0	8228.5	0.163633	2.40308	0.00047619	0.898491	1.35924	5.08778	0.122168
58	0	0	0.770335	0.229665	0	8210.45	0.0794986	2.35754	0.00670707	0.719898	1.5125	4.97638	0.108611
58	0	0.00961538	0.932692	0.0576923	0	8346.6	0.17193	1.85232	0.00154762	0.691144	0.151101	6.69295	0.211471
58	0	0	0.746479	0.253521	0	8182.88	0.0856593	2.34679	0.009627	0.879992	4.05198	3.52829	0
59	0	0.0869565	0.859903	0.0531401	0	8326.36	0.352424	2.0108	0.00399681	0.394573	2.22621	4.81613	0
59	0	0.00483092	0.956522	0.0386473	0	8222.81	0.13048	2.72509	0.00102114	0.232251	0.10562	2.53402	0.3258
59	0	0.0434783	0.951691	0.00483092	0	8352.78	0.448584	2.0101	0.00125171	0.48754	2.38331	4.9719	0
59	0.418269	0.259615	0.230769	0.0528846	0	8219.9	0.0487538	2.54486	0.0356989	0.0294577	0.85053	3.45934	0.25822
59	0	0.271429	0.480952	0.171429	0.0142857	8786.11	0.475394	0.645785	0.0259217	0.238344	0.0620649	3.42935	1.02813
59	0	0	1	0	0	8349.44	0.317544	1.90334	0	0.271471	0.499479	3.42316	0.468915
59	0.514423	0.173077	0.230769	0.0480769	0	8223.15	0.0645094	2.5936	0.0482403	0.0261756	0.767773	3.37565	0.27009
59	0	0.00956938	0.966507	0.0239234	0	8278.47	0.345215	2.25426	0.000595238	0.26009	3.84444	5.21367	0
59	0.947115	0	0.0528846	0	0	8264.92	0.0694035	2.03752	0.0893634	0.00174023	5.40911	6.92316	0
59	0.0526316	0	0.904306	0.0430622	0	8271.98	0.133549	2.25409	0.00417078	0.171692	4.0553	5.5457	0
59	0.00480769	0.0384615	0.927885	0.0288462	0	8284.07	0.175399	2.57817	0.00168269	0.194532	4.23314	5.60795	0
59	0	0.0241546	0.676329	0.0628019	0	8165.35	0.0390723	2.13494	0.0123513	0.814177	0.269515	5.82557	0.273344
59	0	0	0.961722	0.0382775	0	8213.32	0.402792	1.94444	0.000849515	1.44398	2.0489	3.84311	0
59	0	0.0194175	0.839806	0.0145631	0	8178.81	0.232819	1.72198	0.00556005	1.17887	0.0846415	5.42428	0.228466
59	0	0	1	0	0	8262.92	0.257854	1.80398	0	0.310499	1.48138	7.392	0.0764295
59	0	0.00952381	0.933333	0.0571429	0	8334.74	0.0775036	1.80621	0.00157767	0.83881	0.0838105	6.53804	0.158247
59	0.239234	0.0430622	0.636364	0.0717703	0.00956938	8320.39	0.0790581	2.12801	0.0143624	0.0791941	0.631102	8.4897	0.139538
59	0	0.11165	0.567961	0.31068	0	8432.5	0.158401	1.40756	0.0214173	1.5889	1.99288	8.53236	0
59	0	0	0.971154	0	0	8517.37	0.152434	1.90999	0.000600962	0.687137	0.110215	7.99156	0.0853449
59	0.812207	0.0610329	0.0985915	0.0234742	0.00469484	8173.07	0.0771637	2.89524	0.157691	0.00855033	0.702137	0.677557	0.618841
59	0	0.144231	0.754808	0.0576923	0	8361.88	0.135203	0.859163	0.00776693	0.328846	1.65595	4.90211	0.059734
59	0	0.0961538	0.706731	0.129808	0.00961538	8343.58	0.0871722	0.89662	0.0113213	0.298504	1.71852	4.90216	0.0343542
59	0	0.0432692	0.9375	0.0192308	0	8286.18	0.25292	2.48562	0.00130952	0.251573	4.10654	5.48281	0
60	0.00961538	0.197115	0.264423	0.307692	0.134615	8177.7	0.117916	2.54544	0.0406104	0.168514	10.5299	11.3494	0
60	0.0144231	0.278846	0.211538	0.274038	0.149038	8168.95	0.0805145	2.59442	0.0500399	0.122809	10.5179	11.3494	0
60	0.00956938	0.191388	0.30622	0.272727	0.129187	8181.14	0.13154	2.53237	0.0366739	0.187951	10.5409	11.357	0
60	0	0.00952381	0.92381	0.0666667	0	8189.26	0.193153	2.64977	0.00179426	0.308291	10.1938	11.0133	0
60	0	0.105263	0.736842	0.157895	0	8355.07	0.0502209	1.83336	0.00920506	1.7719	9.6994	10.2998	0
60	0	0	0.947368	0	0	8171.39	0.166034	3.07181	0.00185267	0.825714	8.6613	9.55501	0
60	0	0.139423	0.6875	0.173077	0	8340.41	0.0469766	1.85144	0.0110046	1.75838	9.64803	10.2537	0
60	0	0.00483092	0.729469	0.164251	0	8203.32	0.0280247	1.94491	0.00797736	1.71172	7.35964	8.21712	0
60	0	0	0.975845	0.0241546	0	8406.45	0.081562	1.49866	0.000483092	1.30987	7.91005	9.45405	0
60	0	0.115942	0.729469	0.144928	0	7991.35	0.101556	1.4643	0.00876511	1.81416	3.48403	7.09594	0
60	0	0	0.942308	0.0576923	0	8024.98	0.0997132	1.60727	0.00131579	2.02968	2.90678	7.72145	0
60	0	0.0143541	0.875598	0.0813397	0	8093.26	0.147456	1.39306	0.00269402	2.97449	3.38915	7.61044	0
60	0	0	0.975962	0.0240385	0	8016.68	0.0809912	2.06804	0.00076725	2.79361	4.58885	4.53981	0
60	0	0	1	0	0	8077.67	0.194691	1.77676	0	2.44013	2.79321	7.99252	0
60	0	0.00961538	0.413462	0.548077	0	7923.62	0.0825586	2.35242	0.0202368	0.757573	3.05492	6.77953	0
60	0	0.0434783	0.777778	0.0241546	0	8039.71	0.0600932	2.33019	0.00767169	2.35026	2.28419	8.90927	0
60	0	0.0673077	0.668269	0.0673077	0	8062.64	0.0658629	2.1722	0.0116535	2.24806	2.60993	8.8471	0
60	0	0.0576923	0.846154	0.0576923	0	8020.73	0.0782318	2.30817	0.00418611	2.18878	2.09958	8.88723	0
60	0	0.00952381	0.97619	0.0142857	0	8028.39	0.0750099	2.31466	0.000483092	1.70713	1.38012	9.08634	0.0382359
60	0	0	0.971154	0.0288462	0	8105.61	0.299411	2.58643	0.000600962	1.13088	1.27232	9.52714	0.0476779
60	0	0.0338164	0.855072	0.0821256	0	7950.63	0.0377669	2.362	0.00384401	0.993361	1.09298	8.22619	0.0850892
60	0	0	1	0	0	8314.25	0.153915	1.51414	0	1.38936	4.52612	8.70402	0
60	0	0	0.792271	0.207729	0	8569.16	0.24224	1.64707	0.00589796	0.758668	5.02118	9.64479	0
62	0	0	0.350962	0.596154	0	8183.12	0.177723	2.29919	0.030827	1.33643	6.42594	7.35226	0
62	0	0.0236967	0.331754	0.473934	0	8184.26	0.0451492	2.18118	0.0290771	1.57879	6.38819	7.25739	0
62	0	0.0480769	0.783654	0.120192	0	8236.68	0.0707628	1.11731	0.00625854	1.52869	5.89324	7.23505	0
62	0	0.0480769	0.817308	0.0865385	0	8232.45	0.0696935	1.0808	0.00553739	1.62121	5.92648	7.14176	0
62	0	0.0825243	0.88835	0.0291262	0	8178.23	0.0703746	1.01406	0.00308376	2.10013	5.31696	6.92588	0
62	0	0	0.995238	0.0047619	0	8309.54	0.0932749	1.28902	0.000120192	0.456407	5.47812	8.63302	0
62	0	0	0.572115	0.427885	0	7959.07	0.170914	2.93346	0.0261891	0.793415	3.94344	3.88767	0
62	0	0	1	0	0	8154.93	0.346407	1.59676	0	2.85515	3.97244	3.95968	0
62	0	0	1	0	0	8179.26	0.955533	1.26702	0	0.984679	3.94978	4.83033	0
62	0.0528846	0.0865385	0.581731	0.25	0	8328.59	0.182003	1.13995	0.0194602	0.154522	0.33811	2.10552	0.713869
62	0.11165	0.0825243	0.5	0.296117	0	8315.33	0.118272	1.35266	0.0228469	0.113875	0.142767	1.96213	0.775389
62	0	0	0.927885	0.0673077	0	8128.32	0.172071	1.44529	0.00155502	2.55147	4.35192	4.44576	0
62	0	0.0142857	0.971429	0.0142857	0	8202.88	0.0979182	1.51523	0.000600962	1.05632	3.91528	5.14491	0
62	0	0.0239234	0.961722	0.0143541	0	8567.2	0.0858809	1.38781	0.00101621	1.00566	5.1846	10.1119	0
62	0	0	0.975962	0.0240385	0	8505.38	0.164089	0.82903	0.000600962	1.56011	4.25106	11.7321	0
62	0	0	0.894231	0.105769	0	8450.56	0.115942	1.60588	0.00296275	0.805106	4.09626	11.2351	0
62	0	0.0145631	0.961165	0.0242718	0	8231.64	0.340467	2.70163	0.000961538	0.334085	1.4245	6.21624	0.120172
62	0	0.00947867	0.909953	0.0805687	0	8281.08	0.638936	1.23889	0.00250342	1.83866	0.165872	0.864719	1.10406
62	0	0.00966184	0.985507	0.00483092	0	8245.65	0.536595	1.31879	0.000240385	2.03218	0.307463	0.688491	1.28491
62	0	0.0288462	0.870192	0.0865385	0	8192	0.120837	1.81405	0.0042806	0.374588	4.32226	7.37441	0
62	0	0.190476	0.133333	0.0666667	0	8105.94	0.0777712	3.6266	0.0557829	1.47824	3.13456	7.55609	0
62	0	0.0724638	0.391304	0	0.0144928	8103.98	0.0509225	3.16352	0.0318454	1.34199	3.35802	8.29103	0
64	0	0	0.908213	0.0917874	0	7923.73	0.0738371	3.4207	0.00268631	0.505972	3.23463	5.02199	0
64	0	0	0.809524	0.190476	0	7971.95	0.0633153	2.46589	0.00804928	1.33176	4.43556	4.45435	0
64	0	0.0336538	0.413462	0.548077	0	7998.7	0.0445056	2.39923	0.025278	2.51889	3.72065	3.67027	0
64	0	0	0.961353	0.0386473	0	7969.99	0.0522651	2.44392	0.000878461	1.43728	4.29784	4.24297	0
64	0	0	0.908213	0.0917874	0	7994.92	0.0623737	2.20536	0.0023626	2.00506	4.42953	4.3765	0
64	0	0	0.990431	0.00956938	0	8005.34	0.0698725	2.19694	0.000239234	2.24938	4.499	4.447	0
64	0	0	1	0	0	8006.18	0.0728428	2.19401	0	2.28068	4.51118	4.45932	0
64	0	0	0.995192	0.00480769	0	8009.96	0.08715	2.17611	0.000120773	2.26472	4.53542	4.48346	0
64	0	0	0.860577	0.139423	0	7944.78	0.081972	4.17619	0.0040226	0.494978	2.25039	4.17894	0
64	0	0	0.971014	0.0289855	0	8007.15	0.0768891	2.18564	0.00111089	2.38847	4.53401	4.48267	0
64	0	0	0.9375	0.0625	0	7996.8	0.177208	3.88968	0.0014993	1.00077	3.99293	4.9435	0
64	0	0	0.957143	0.0428571	0	8026.07	0.191227	2.43741	0.000961538	1.50696	4.38422	5.04607	0
64	0	0	0.918269	0.0817308	0	7968.67	0.0667004	2.64327	0.00291378	1.31155	4.14556	4.09031	0
64	0	0.138756	0.669856	0.076555	0	8193.08	0.0437074	2.05408	0.0104037	1.49701	7.20422	8.11531	0
64	0	0	1	0	0	8047.75	0.672815	1.15057	0	2.3324	2.08852	3.88885	0
64	0	0	0.860577	0.139423	0	7983.69	0.0836368	2.46779	0.00362778	1.81668	4.14423	4.09047	0
64	0	0.0334928	0.574163	0.277512	0	8324.59	0.0412379	1.4879	0.0152356	1.8563	10.744	11.5413	0
64	0	0.0531401	0.318841	0.550725	0	8280.38	0.178922	1.31211	0.0371048	1.37997	0.411512	5.95129	0.291318
64	0	0.0288462	0.572115	0.317308	0	8230.68	0.0900915	1.18545	0.0223975	1.91308	1.09802	4.24837	0.0697991
64	0	0	0.855769	0.144231	0	7976.1	0.0994321	1.58855	0.00416549	1.83052	2.03468	3.85293	0
64	0	0	0.722488	0.263158	0	7922.07	0.0471355	3.45591	0.00882868	0.411573	3.3279	4.95977	0
65	0	0	0.828571	0.171429	0	8111.7	0.0871953	1.16276	0.00378671	2.00798	1.87507	2.09928	0
65	0	0	0.653846	0.346154	0	8106.15	0.476468	1.41478	0.0130827	2.30622	1.57282	1.71373	0.0950796
65	0	0	0.163462	0.836538	0	8088.83	0.740279	0.833436	0.104152	2.14006	1.41164	1.36995	0.160602
65	0	0	0.230769	0.769231	0	8089.44	0.715351	0.834288	0.083981	2.12361	1.43024	1.38953	0.158773
65	0	0.0144231	0.764423	0.173077	0	8109.72	0.116047	2.45254	0.00675332	1.49731	3.83493	6.59663	0
65	0	0.0430622	0.215311	0.0239234	0	8104.29	0.0641829	3.19593	0.0444921	1.79222	3.62507	7.91748	0
65	0	0	0.850242	0.149758	0	8108.38	0.0930606	2.28647	0.00423589	1.81402	4.01679	7.06707	0
65	0	0.0380952	0.590476	0	0	8146.61	0.168605	2.63639	0.0175253	0.993122	2.92008	8.71186	0
65	0.0432692	0.0384615	0.860577	0.0432692	0.0144231	8203.27	0.511111	2.00443	0.00547283	0.166808	2.57378	8.44754	0
65	0	0.121359	0.796117	0.0339806	0.00970874	8184.89	0.0680518	1.94992	0.00650668	0.964426	3.23615	9.30691	0
65	0	0	0.966825	0.0331754	0	8338.71	0.239224	1.35787	0.000598086	1.26258	1.0939	11.9969	0.0369004
65	0	0	1	0	0	8431.46	0.121365	1.45497	0	1.05729	4.26492	11.1381	0
65	0	0	0.94686	0.0531401	0	8570.64	0.236116	2.42201	0.00107143	0.351901	2.83427	12.6015	0
65	0	0	0.966825	0.0331754	0	8246.96	0.0779488	1.84504	0.000841346	0.313904	2.41053	10.1031	0
65	0	0.0434783	0.115942	0	0	8105.43	0.0657349	2.98068	0.057679	1.61541	3.85489	8.39861	0
65	0	0.052381	0.485714	0.0047619	0	8108.08	0.0764368	3.23309	0.0287964	0.873209	2.90001	8.23461	0
65	0	0.00961538	0.817308	0.0336538	0	8123.29	0.0930004	3.68836	0.00657379	0.72186	2.22027	6.83825	0
65	0	0.105769	0.509615	0	0	8116.35	0.0507646	3.83801	0.0335209	0.805099	2.33198	7.07691	0
65	0	0	0.774038	0.192308	0	8104.83	0.233582	3.1523	0.00828781	2.06187	3.85825	7.75098	0
65	0	0	0.458937	0.0434783	0	8110.99	0.12577	3.42503	0.0271674	0.682167	2.70723	8.16634	0
66	0.105769	0.0817308	0.596154	0.163462	0.0288462	8125.9	0.112984	3.81249	0.0194302	0.0890439	6.06938	7.32312	0
66	0	0.00478469	0.990431	0.00478469	0	8122.3	0.0927551	3.78629	0.000239234	0.244201	5.61357	6.97872	0
66	0	0	1	0	0	8106.43	0.211898	3.46068	0	0.592696	4.64135	6.01357	0
66	0	0	0.330144	0.665072	0	8137.72	0.0465253	2.5281	0.0281827	0.843719	5.6799	6.77008	0
66	0	0	0.507246	0.42029	0	8171.56	0.226645	2.50659	0.0165069	1.07676	6.26937	7.25605	0
66	0	0	0.980769	0.0192308	0	8113.43	0.100056	3.80463	0.000603865	0.300109	5.55525	6.96196	0
66	0	0.122066	0.431925	0.361502	0	8170.16	0.0661669	2.61297	0.0255283	0.911747	6.59695	7.62051	0
66	0.0288462	0.120192	0.745192	0.105769	0	8103.93	0.111364	3.2641	0.0117279	0.16298	4.46032	5.96469	0
66	0	0.0338164	0.657005	0.125604	0	8114.02	0.0532491	2.32945	0.00956206	0.842282	3.5648	5.25934	0
66	0.0473934	0.199052	0.521327	0.0521327	0.14218	8103.84	0.0491634	3.62598	0.0352316	0.100598	5.11961	6.60333	0
66	0	0	0.932367	0.0676329	0	8104.13	0.0499649	3.6921	0.0018427	0.262846	4.91919	6.38136	0
66	0	0	1	0	0	8105.62	0.12571	3.44339	0	0.500437	4.56091	5.95499	0
66	0	0.00956938	0.569378	0.272727	0	8108.99	0.0641339	2.50455	0.0123162	0.572115	3.74892	5.40388	0
66	0	0.00956938	0.870813	0.119617	0	8173.04	0.159443	0.591141	0.00287783	1.74957	4.98042	3.7143	0
66	0.423077	0.0961538	0.365385	0.0913462	0	8149.83	0.0683282	3.40609	0.0335786	0.0369619	1.94228	2.81286	0
66	0.0528846	0.197115	0.451923	0.293269	0	8219.2	0.0729066	2.91728	0.02783	0.0883375	1.17799	1.75046	0.326584
66	0.0334928	0.172249	0.382775	0.411483	0	8254.97	0.0671327	2.81552	0.0316826	0.105545	1.1973	1.67812	0.503151
66	0	0	0.802885	0.100962	0	8178.72	0.325601	1.96929	0.00488664	1.53353	0.510453	5.00495	0.140333
66	0	0	0.957746	0.0422535	0	8023.82	0.479303	1.32439	0.000603865	1.89734	2.43755	4.25601	0
66	0	0	0.778846	0.221154	0	8168.98	0.58678	1.46783	0.00801164	0.841329	5.45112	5.4939	0
66	0	0	1	0	0	8172.93	0.335738	1.17516	0	0.85161	2.23284	3.04575	0
66	0	0	1	0	0	8117.49	0.0700967	3.72147	0	0.245043	5.74396	7.12972	0
66	0.0144231	0.0192308	0.932692	0.0336538	0	8134.4	0.171271	3.6585	0.0024828	0.201492	6.57459	7.7821	0
66	0	0	0.966667	0.0333333	0	8141.58	0.2146	3.51898	0.0011261	0.268455	6.62173	7.80077	0
66	0	0.0657277	0.676056	0.220657	0	8144.9	0.119328	3.45068	0.0100369	0.290308	6.47581	7.62946	0
66	0	0	0.966346	0	0	8160.91	0.265557	2.73854	0.000724638	0.863058	7.24225	8.28029	0
66	0	0	0.971429	0.0285714	0	8278.77	0.0958283	1.2563	0.000595238	1.53728	6.78826	7.07295	0
66	0	0	0.990385	0.00961538	0	8314.61	0.194501	1.21178	0.000119617	1.65269	7.29488	7.37898	0
66	0	0	1	0	0	8206.86	0.25509	1.3951	0	2.97941	5.80252	5.77922	0
67	0	0	0.990431	0.00956938	0	8117.18	0.0791801	1.33387	0.000239234	3.09457	3.84619	7.37898	0
67	0	0	1	0	0	8183.61	0.446492	1.0624	0	3.01769	4.40754	6.88964	0
67	0	0.0480769	0.817308	0.0865385	0	8232.45	0.0696935	1.0808	0.00553739	1.62121	5.92648	7.14176	0
67	0	0.0288462	0.899038	0.0721154	0	8233.28	0.0782196	1.07841	0.00303397	1.61614	5.76997	7.17901	0
67	0	0.00480769	0.913462	0.0817308	0	8270.01	0.180307	1.1721	0.00179426	1.37434	5.82024	7.39633	0
67	0	0.0238095	0.928571	0.047619	0	8237.53	0.0940363	1.12236	0.0015625	1.73648	4.88875	7.57584	0
67	0	0.0717703	0.717703	0.143541	0	8239.71	0.0723518	1.17805	0.00931313	1.45717	6.0387	7.28381	0
67	0	0	1	0	0	8156.55	0.240406	1.21107	0	3.87355	5.01132	4.98305	0
67	0	0	1	0	0	8187.11	0.334649	1.4959	0	3.03674	5.72602	5.70485	0
67	0	0	1	0	0	8294.05	0.0790885	1.27391	0	1.78238	6.99571	7.08691	0
67	0	0	1	0	0	8229.04	0.32959	2.4213	0	0.440174	3.00867	7.97348	0
67	0	0	0.985577	0.0144231	0	8248.22	0.293037	2.03678	0.000480769	0.564161	2.97353	8.10162	0
67	0.0432692	0.0384615	0.860577	0.0432692	0.0144231	8203.27	0.511111	2.00443	0.00547283	0.166808	2.57378	8.44754	0
67	0	0	0.733333	0.266667	0	8211.34	0.472099	0.749052	0.00817297	1.55895	3.97904	9.91966	0
67	0	0.0576923	0.855769	0.0865385	0	8358.59	0.156466	1.37369	0.00399551	1.46648	3.22906	12.5854	0
67	0	0.00952381	0.933333	0.0571429	0	8334.74	0.0775036	1.80621	0.00157767	0.83881	0.0838105	6.53804	0.158247
67	0.0384615	0.120192	0.725962	0.0961538	0.0192308	8278.41	0.15463	2.0155	0.00921736	0.113201	0.0870724	8.06042	0.389213
67	0.178744	0.0531401	0.63285	0.0724638	0	8167.12	0.373981	1.94747	0.0253048	0.0941662	3.54533	7.28674	0
67	0	0	0.610577	0.389423	0	8218.64	0.244538	0.656181	0.0121178	2.74642	7.01383	6.75935	0
67	0	0.0144928	0.724638	0.0772947	0	8119.43	0.214032	3.46144	0.00904848	0.421984	2.44531	8.1532	0
67	0	0.125604	0.816425	0.0483092	0	8180.94	0.0573824	1.06032	0.00469137	2.1452	5.14734	6.99861	0
67	0	0	1	0	0	8228.76	0.112211	1.05251	0	2.35138	5.78074	6.49521	0
67	0	0	1	0	0	8238.49	0.0970542	1.12314	0	2.27562	6.03052	6.49643	0
67	0	0	1	0	0	8298.25	0.197316	1.27186	0	1.86636	7.12942	7.16819	0
67	0	0	1	0	0	8299.11	0.206024	1.2672	0	1.85828	7.13608	7.17563	0
67	0	0	0.990385	0.00961538	0	8314.61	0.194501	1.21178	0.000119617	1.65269	7.29488	7.37898	0
68	0	0.00956938	0.84689	0.119617	0	7919.77	0.0950669	2.43705	0.00349792	0.5094	0.617224	8.80785	0.153291
68	0.270142	0.00473934	0.582938	0.137441	0	7943.12	0.0910283	1.80316	0.0161837	0.065256	0.974339	9.30419	0.153291
68	0.0769231	0.00480769	0.740385	0.173077	0	7992.39	0.103938	1.54808	0.00868663	0.139162	1.27848	9.74482	0.132458
68	0	0	0.903382	0.0966184	0	8000.23	0.0813356	2.14787	0.0024828	1.94428	4.48666	4.43338	0
68	0	0	0.990431	0.00956938	0	8005.34	0.0698725	2.19694	0.000239234	2.24938	4.499	4.447	0
68	0	0	0.976303	0.0236967	0	8109.48	0.0828807	2.61534	0.000595238	1.12506	1.98715	10.0086	0
68	0	0	0.908654	0.0913462	0	7997.71	0.0720024	2.17686	0.0023626	1.97627	4.46299	4.40985	0
68	0.100962	0	0.884615	0.0144231	0	8045.49	0.103073	2.58152	0.00346797	0.142721	1.51018	2.31396	0.0386038
68	0.0432692	0	0.942308	0.0144231	0	8050.25	0.115183	2.53418	0.00111089	0.167741	1.55258	2.32216	0.0313843
68	0.0333333	0.0238095	0.857143	0.0857143	0	8067.56	0.131644	1.8832	0.00753362	0.185811	2.3562	2.64892	0
68	0.105263	0	0.784689	0.105263	0	8035.4	0.079379	2.36484	0.00701332	0.126056	1.82905	2.20894	0.00032397
68	0	0	1	0	0	8208.73	0.299267	1.44098	0	2.18718	0.13756	0.537331	7.77139
68	0	0	1	0	0	8204.19	0.201709	3.56629	0	0.649098	0.796578	0.97314	0.343259
68	0	0	0.990385	0.00961538	0	8200.86	0.0574502	5.39591	0	0.299065	0.971658	1.95369	0.188062
68	0.0776699	0.11165	0.737864	0.0728155	0	8182.66	0.102455	5.08218	0.0166482	0.127364	0.803576	1.70152	0.268817
68	0	0	0.995192	0.00480769	0	8158.94	0.0438098	2.02682	0.000119048	1.65558	0.114839	0.201462	9.14803
68	0	0.00961538	0.990385	0	0	8285.46	0.277811	2.90837	0.000358852	0.311382	1.36805	3.73258	0.0336145
68	0.0240385	0.120192	0.543269	0.3125	0	8515.56	0.0943194	2.1039	0.0171149	0.148673	3.28529	12.7697	0
68	0	0	0.966825	0.0331754	0	8246.96	0.0779488	1.84504	0.000841346	0.313904	2.41053	10.1031	0
68	0	0	0.913462	0.0817308	0	8105.5	0.154247	3.73196	0.00216346	0.21986	0.118299	3.166	0.194272
68	0	0	0.995215	0.00478469	0	8364.3	0.206548	1.39105	0	1.05228	4.86739	8.69511	0
68	0	0	0.908654	0.0913462	0	7995.43	0.0649873	2.19706	0.00237402	2.0017	4.44005	4.38703	0
68	0	0	0.851675	0.148325	0	7983.78	0.0786241	2.50853	0.00395348	1.87742	4.07256	4.01902	0
68	0	0	0.769231	0.230769	0	8077.02	0.237802	1.89367	0.0081267	3.6343	4.00598	3.96444	0
68	0	0	0.334928	0.617225	0	7970.86	0.0855743	2.73891	0.0391691	1.48765	3.51461	3.45903	0
68	0	0	1	0	0	8063.29	0.168169	2.13438	0	1.41465	3.11354	3.05779	0
68	0	0	0.894231	0.105769	0	8065.4	0.0817652	1.93668	0.00290713	3.06335	2.13476	2.0853	0
69	0.413462	0.221154	0.163462	0.144231	0.0480769	8181.91	0.13949	4.08461	0.0600432	0.0248705	1.35785	1.94672	0.17568
69	0	0	1	0	0	8243.53	0.0749271	2.40893	0	1.02128	1.60872	1.87313	0.0221325
69	0.0432692	0.0913462	0.759615	0.0528846	0	8173.77	0.0784778	4.12063	0.00894489	0.147026	0.508551	1.00336	0.366373
69	0	0	1	0	0	8205.65	0.286046	3.5713	0	0.717594	0.709388	0.843177	0.333244
69	0	0.0194175	0.966019	0	0	8144.88	0.12148	3.25004	0.000891131	0.21935	2.76914	3.39089	0
69	0.0384615	0.115385	0.634615	0.149038	0	8122.9	0.0404224	3.13423	0.0115497	0.165102	3.02624	3.62172	0
69	0	0.0192308	0.966346	0	0	8145.07	0.121256	3.2503	0.000899783	0.219679	2.76756	3.3891	0
69	0	0.138756	0.76555	0.0669856	0	8130.49	0.0661688	3.18317	0.00762453	0.24022	2.85053	3.51551	0
69	0.115385	0.0336538	0.336538	0.00961538	0	8116.5	0.0303676	3.14085	0.0435727	0.137145	2.77015	3.58053	0
69	0.163462	0.0432692	0.350962	0.00961538	0	8116.29	0.0314913	3.13314	0.0379497	0.121704	2.79292	3.60252	0
69	0.00966184	0.0241546	0.719807	0.241546	0	8112.89	0.0872708	2.86984	0.0112525	0.170141	3.26432	3.92175	0
69	0.0526316	0.062201	0.526316	0.339713	0	8117.34	0.0359853	2.97997	0.020874	0.142779	3.16517	3.77626	0
69	0.190476	0.0333333	0.342857	0.00952381	0	8116.19	0.0318179	3.12851	0.0360338	0.115496	2.79541	3.60672	0
69	0.0384615	0.153846	0.490385	0.317308	0	8243.62	0.065889	2.84965	0.0237226	0.114579	1.24714	1.72052	0.378299
69	0.423077	0.0961538	0.365385	0.0913462	0	8149.83	0.0683282	3.40609	0.0335786	0.0369619	1.94228	2.81286	0
69	0.0526316	0.181818	0.526316	0.229665	0	8212.45	0.0779368	2.95287	0.0207843	0.0915292	1.20957	1.78641	0.258725
69	0.0334928	0.172249	0.382775	0.411483	0	8254.97	0.0671327	2.81552	0.0316826	0.105545	1.1973	1.67812	0.503151
69	0	0.0861244	0.598086	0.315789	0	8215.91	0.082164	2.91837	0.0181292	0.177849	0.995302	1.7328	0.466671
70	0	0.0047619	0.980952	0.0142857	0	8273.29	0.281864	1.31664	0.000358852	1.96333	1.41734	3.03109	0.279519
70	0	0.00966184	0.830918	0.115942	0	8211.27	0.172622	1.22441	0.00387532	1.91058	1.37932	3.11535	0.256819
70	0	0.0191388	0.799043	0.138756	0	8184.04	0.117583	1.22805	0.00469137	1.93046	1.34232	3.16228	0.298279
70	0	0	0.779343	0.183099	0	8075.29	0.0816349	0.981527	0.00640361	2.07274	0.116841	0.928695	2.78212
70	0	0	0.830918	0.169082	0	8107.89	0.432363	1.1693	0.00445566	2.85435	0.0641738	0.262776	3.9864
70	0	0.0336538	0.942308	0.0144231	0	8171.26	0.373526	1.01134	0.00144231	0.727386	0.179845	1.44422	1.42818
70	0	0	0.830918	0.130435	0	8076.3	0.0939582	0.990058	0.0049648	2.03591	0.124072	0.909567	2.71874
70	0	0	0.995192	0.00480769	0	8216.04	0.654989	0.792248	0.000120773	1.67528	0.758656	1.57607	0.347626
70	0	0	0.990291	0.00970874	0	8221.69	0.0704682	0.700712	0.000240385	1.8724	0.946657	2.03889	0.399526
70	0	0	0.904762	0.0571429	0	8088.03	0.161619	1.01242	0.00251551	1.93432	0.15281	0.84048	2.53985
70	0	0	0.9375	0.0625	0	8248.62	0.373684	1.12488	0.00154188	2.12137	0.802302	2.85541	0.900297
70	0	0	0.745192	0.254808	0	8205.43	0.20573	1.50708	0.00801803	2.81785	0.225898	0.602488	3.61185
70	0	0.0241546	0.888889	0.0869565	0	8132.27	0.0611742	1.28573	0.00270703	1.63653	1.62047	2.97843	0.0409818
70	0	0	0.918269	0.0817308	0	8135.1	0.0813762	1.25756	0.00167464	1.85233	1.40404	3.15472	0.201126
70	0.0193237	0.207729	0.647343	0.0241546	0	8254.44	0.170353	1.77883	0.0166848	0.108062	4.14839	5.31346	0
70	0	0	1	0	0	8391.91	0.22978	3.41553	0	0.602003	1.23396	6.84665	0.0985948
70	0	0	0.971292	0.0191388	0	8391.12	0.175741	3.37363	0.000653891	0.636143	1.2076	6.91968	0.130044
70	0	0.00961538	0.75	0.240385	0	8200.12	0.107463	2.43899	0.00777901	0.730846	1.7282	4.82565	0.020453
70	0	0.00961538	0.990385	0	0	8244.27	0.707537	1.17311	0.000239234	1.13488	0.0822453	2.09761	1.45123
70	0	0	0.985577	0	0	8247.42	0.612668	1.20117	0.000358852	0.87645	0.0964882	2.05383	1.64482
70	0	0	0.927885	0.0721154	0	8180.34	0.0519892	1.1164	0.00168269	1.98296	0.300946	2.90632	1.53079
71	0	0	0.91866	0.0813397	0	8596.4	0.617731	1.86794	0.00173248	0.471226	0.0847356	0.448033	0.8505
71	0	0	0.975962	0.0240385	0	8574.41	0.740323	2.06327	0.000724638	0.733375	0.29617	0.98581	0.803086
71	0	0	1	0	0	8545.37	0.423141	1.9454	0	0.568881	0.404946	1.18385	0.746319
71	0	0	0.985577	0.0144231	0	8596.28	0.491916	1.8482	0.000242718	0.571847	0.160191	0.440841	0.879386
71	0	0	0.942308	0.0576923	0	8557.44	0.73404	2.22244	0.00132212	0.77847	0.38617	1.31576	0.716409
72	0.0956938	0.215311	0.430622	0.248804	0.00956938	8549.1	0.376196	2.18431	0.0303958	0.0677011	3.18545	12.9022	0
72	0.0758294	0.170616	0.549763	0.180095	0.0236967	8543.75	0.38848	2.15916	0.0205616	0.0819725	3.22101	12.8907	0
72	0.101449	0.0483092	0.729469	0.120773	0	8244.75	0.0581458	1.87771	0.00845971	0.0840887	1.16991	11.3214	0.0349703
72	0.0430622	0.0334928	0.870813	0.0526316	0	8246.8	0.0689159	1.90324	0.00382644	0.164317	1.27408	11.4458	0.0281244
72	0	0	1	0	0	8261.25	0.0856905	1.91682	0	0.297947	1.3888	11.5693	0.0187688
72	0	0	0.875	0.125	0	8274.31	0.087843	1.91604	0.00423458	0.7565	2.39792	11.6191	0
72	0	0.0480769	0.730769	0.221154	0	8292.63	0.0591429	1.47179	0.00718553	0.886042	1.73697	12.5534	0.00334357
72	0	0	0.990431	0.00956938	0	8309.33	0.311736	2.02514	0.000357143	0.632894	1.92429	11.7689	0
72	0	0	1	0	0	8327.3	0.25673	1.57084	0.000117371	1.05667	1.84706	12.5032	7.02054e-05
72	0	0	1	0	0	8421.01	0.104439	1.65028	0	0.611045	0.80589	10.5781	0.0369004
72	0	0	1	0	0	8418.58	0.101059	1.60273	0	0.639126	0.757557	10.5635	0.0369004
72	0	0	0.995192	0.00480769	0	8413.66	0.101524	1.51146	0.000120773	0.712071	0.674245	10.5612	0.0369004
72	0	0	0.981221	0.0187793	0	8429.33	0.126527	1.71995	0.000364078	0.579246	0.871744	10.6385	0.0369004
72	0	0	1	0	0	8430.42	0.268397	1.72017	0	0.420748	0.914483	10.2963	0.0369004
72	0	0.00483092	0.951691	0.0434783	0	8415.34	0.261792	1.44689	0.000895436	0.803858	0.513065	10.423	0.0369004
72	0	0	1	0	0	8428.05	0.301038	1.73146	0	0.377014	0.948387	10.184	0.0369004
72	0	0.00478469	0.976077	0.0191388	0	8464.34	0.628027	1.26727	0.000480769	0.792528	0.65112	10.0282	0.0369004
72	0	0	0.947115	0.0528846	0	8362.26	0.293436	1.38546	0.000952381	1.20826	1.14801	12.0616	0.0369004
72	0	0.00961538	0.990385	0	0	8390.03	0.19295	1.81213	0.000238095	0.58618	3.50342	11.8636	0
72	0	0	0.961905	0.0380952	0	8351.76	0.213233	1.35432	0.000721154	1.23164	1.06682	11.9802	0.0369004
72	0	0	0.846154	0.153846	0	8353.61	0.204159	1.27325	0.00398254	0.921225	0.174077	10.9599	0.0369004
72	0	0	0.852381	0.147619	0	8470.3	0.254002	1.53214	0.00373716	0.421154	1.22647	11.523	0.0338856
72	0	0	0.918269	0.0817308	0	8435.62	0.509423	1.8231	0.00185267	0.543944	1.67402	12.4823	0.00594962
72	0.103286	0.0704225	0.596244	0.230047	0	8264.05	0.0985204	1.82771	0.0124024	0.0966052	1.06133	11.1638	0.0369004
74	0.0574163	0.0717703	0.799043	0.0717703	0	8241.77	0.0828267	1.91903	0.00601412	0.0973362	1.26473	11.2758	0.0271259
74	0.0873786	0.0728155	0.694175	0.145631	0	8247.69	0.0687811	1.88055	0.00933152	0.0775501	1.17363	11.2561	0.0343302
74	0	0	1	0	0	8261.72	0.0749781	1.89148	0	0.278678	1.32507	11.5683	0.0249431
74	0	0.00480769	0.980769	0.0144231	0	8301.49	0.125569	1.76672	0.000644549	1.01612	2.2913	9.53352	0
74	0	0	1	0	0	8287.89	0.29227	1.98561	0	0.90613	2.22778	9.41077	0
74	0.110577	0.0865385	0.721154	0.0721154	0	8228.47	0.0548514	1.96826	0.00823285	0.0713923	1.31933	11.0195	0.0194769
74	0.134615	0.0769231	0.759615	0.0288462	0	8228.67	0.0854733	1.99574	0.00801354	0.10214	1.42792	11.1242	0.0112701
74	0	0	0.942308	0.0576923	0	8388.24	0.52478	1.19304	0.00120192	1.41033	1.7717	9.52487	0.00114129
74	0	0.00970874	0.951456	0.038835	0	8290.9	0.0764927	1.95856	0.00113698	0.833336	2.35958	9.78881	0
74	0	0	1	0	0	8232.22	0.318867	1.87172	0	0.300246	1.81111	10.6121	0.000683901
74	0	0	0.908654	0.0913462	0	8219.19	0.506095	2.33736	0.00221325	0.581219	2.77895	9.64825	0
74	0	0	1	0	0	8341.96	0.117607	1.45104	0	1.21724	2.23197	9.38695	0
74	0	0	0.956522	0.0434783	0	8262.91	0.0792307	1.91572	0.000961538	0.525593	2.37388	9.98381	0
74	0	0.0144231	0.822115	0.163462	0	8292.81	0.527208	1.75941	0.00482135	0.854054	1.82978	9.9998	0.000263592
74	0	0.0336538	0.932692	0.0336538	0	8196.08	0.0813965	1.66436	0.00173248	0.704738	3.55005	10.0533	0
74	0	0	0.990338	0.00966184	0	8332.61	0.320256	1.41011	0.000240385	1.09978	1.36203	9.87944	0.0179575
74	0	0	0.966346	0.0336538	0	8270.42	0.0781165	1.94548	0.000595238	0.627191	2.37129	9.92256	0
74	0	0	0.932692	0.0673077	0	8252.53	0.218073	2.45023	0.0017493	0.229733	1.40351	7.80894	0.0598537
74	0	0	0.995169	0.00483092	0	8385.39	0.351351	1.10677	0.000239234	1.39839	2.0563	9.28427	0
74	0	0	1	0	0	8248.66	0.195316	2.03971	0	0.486571	1.72759	8.80472	0.0038312
75	0.980769	0	0	0	0.0192308	8286.22	0.0414544	3.31303	0.482388	0.000480769	3.1278	11.1388	0
75	0.00485437	0.286408	0.529126	0.150485	0	8314.21	0.0609136	2.70552	0.0289469	0.149399	4.04726	10.8756	0
75	0.0144231	0.269231	0.485577	0.158654	0	8331.01	0.0985783	1.89613	0.0222797	0.201821	4.44755	10.5125	0
75	0	0.0191388	0.937799	0.0430622	0	8396.41	0.124349	1.58822	0.00180288	0.716814	4.83227	11.25	0
75	0	0.00961538	0.841346	0.120192	0	8314.32	0.10307	1.41183	0.00415631	0.586273	4.46434	12.3265	0
75	0	0	0.956311	0.0436893	0	8577.75	0.278651	1.18892	0.000721154	2.5298	4.79312	12.8907	0
75	0	0	0.927885	0.0721154	0	8308.42	0.0784388	1.51473	0.00178571	1.28819	2.75852	12.1138	0
75	0	0	0.995146	0.00485437	0	8217.5	0.089109	2.24725	0	0.66106	2.37316	8.75248	0
75	0	0.00478469	0.91866	0.0239234	0	8122.79	0.0989466	3.76503	0.002172	0.887041	2.39047	6.9435	0
75	0	0.0628019	0.879227	0.0289855	0	8174.17	0.0731788	2.36566	0.00337935	0.915609	2.7339	8.77589	0
75	0	0.0430622	0.215311	0.0239234	0	8104.29	0.0641829	3.19593	0.0444921	1.79222	3.62507	7.91748	0
75	0	0.0144928	0.797101	0.057971	0	8114.5	0.158584	3.27567	0.00613402	0.524911	2.90745	5.56447	0
75	0	0.0144928	0.913043	0.0724638	0	8229.69	0.759743	1.32408	0.00201297	1.01083	3.76044	9.23439	0
75	0	0	0.990385	0.00961538	0	8191.63	0.111252	1.98427	0.000241546	0.349136	2.74784	7.9166	0
75	0	0.121359	0.796117	0.0339806	0.00970874	8184.89	0.0680518	1.94992	0.00650668	0.964426	3.23615	9.30691	0
75	0	0.0192308	0.908654	0.0721154	0	8211.21	0.720205	1.26003	0.0015625	1.06393	3.76021	9.32865	0
75	0	0.00961538	0.9375	0.0528846	0	8249.51	0.691699	1.09513	0.00108173	1.34588	3.7514	10.0041	0
75	0.130435	0.125604	0.531401	0.188406	0.00483092	8306.43	0.0511173	3.09927	0.0207246	0.0792586	0.273637	7.40486	0.198081
75	0	0	1	0	0	8195.97	0.213224	2.03837	0	0.693406	0.258993	6.29161	0.332647
75	0	0	0.932692	0.0384615	0	8196.65	0.371334	1.85785	0.00161229	1.36695	0.242805	5.17054	0.172901
75	0	0.0240385	0.451923	0.115385	0	8143.24	0.047716	2.64326	0.023038	1.12986	0.740198	5.43047	0.147537
75	0	0.052381	0.485714	0.0047619	0	8108.08	0.0764368	3.23309	0.0287964	0.873209	2.90001	8.23461	0
75	0.0333333	0.119048	0.652381	0.147619	0	8329.2	0.0874779	2.09155	0.0234088	0.182423	4.47821	10.8114	0
75	0	0.0576923	0.740385	0.134615	0	8126.5	0.0671016	3.27018	0.00724123	0.807966	1.22259	7.74719	0.223559
75	0	0.00961538	0.850962	0.0336538	0	8122.71	0.0902383	3.78055	0.00476829	0.929406	2.42524	6.96488	0
75	0	0	0.774038	0.192308	0	8104.83	0.233582	3.1523	0.00828781	2.06187	3.85825	7.75098	0
75	0	0	0.751196	0.248804	0	8161.2	0.154937	2.61098	0.0094935	1.12286	0.408083	7.85312	0.275974
78	0	0	1	0	0	7939.26	0.179574	3.50745	0	0.390157	0.527242	3.81121	0.570094
78	0	0	0.985577	0.0144231	0	7936.46	0.170225	3.511	0.000236967	0.347497	0.567998	3.797	0.559673
78	0	0	1	0	0	7936.71	0.15735	3.75245	0	0.210713	0.772415	4.13177	0.407606
78	0	0	1	0	0	7969.55	0.220405	3.3028	0	0.450639	0.427286	3.5383	0.639089
78	0	0	0.320574	0.679426	0	8012.68	0.275086	4.42198	0.0681958	0.423142	2.75022	3.856	0
78	0	0	1	0	0	7936.95	0.224908	3.6489	0	0.318998	0.648762	4.09973	0.492758
78	0	0	0.924171	0.0758294	0	7932.01	0.113306	3.51173	0.00229079	0.23645	0.654692	3.65785	0.537394
78	0	0	1	0	0	7997.56	0.307619	4.33379	0	0.339543	1.62853	2.21626	0.0114258
78	0.0769231	0.0336538	0.807692	0.0817308	0	7985.59	0.131702	4.5509	0.0100173	0.1553	1.7534	2.12118	0.00340017
78	0	0	0.985577	0.0144231	0	7987.14	0.168183	2.68089	0.000483092	0.369995	0.166628	3.06016	0.708514
78	0	0	0.952153	0.0478469	0	7979.25	0.232958	2.25541	0.00101132	0.666251	0.221822	2.56568	0.685282
78	0	0	0.990476	0.00952381	0	7976.5	0.37025	4.81105	0.000238095	0.413742	1.87376	2.77544	1.09245e-05
78	0.0821256	0	0.869565	0.0483092	0	7957.22	0.078124	4.96994	0.00393535	0.11271	2.02357	3.88739	0
78	0	0.0339806	0.912621	0.0533981	0	7949.07	0.147542	4.97383	0.0029344	0.291011	1.91282	3.42023	0
78	0	0	0.990338	0.00966184	0	7970.18	0.376584	4.75728	0.000241546	0.443384	1.81415	2.84481	0.000474062
78	0.057971	0.0628019	0.763285	0	0.0144928	7968.5	0.0536356	5.15513	0.00794103	0.116646	2.36628	3.45071	0
78	0	0.0287081	0.947368	0.0239234	0	7952.44	0.182024	4.94038	0.00108173	0.383687	1.87961	3.2512	0
78	0.138756	0.062201	0.526316	0	0.0478469	7953.79	0.0277503	5.10239	0.0337563	0.0732288	2.48965	3.63515	0
79	0.338095	0.0666667	0.37619	0.219048	0	7929.54	0.290444	4.11836	0.0473991	0.0791335	3.7166	4.2828	0
79	0.480769	0.0625	0.331731	0.125	0	7925.06	0.275065	4.01973	0.0682121	0.0507224	3.70255	4.24151	0
79	0.442308	0	0.504808	0.0528846	0	7957.09	0.0592504	3.64165	0.0471778	0.0574395	1.79006	2.3307	0.00383226
79	0	0	0.278846	0.721154	0	7951.73	0.35791	4.46382	0.0676473	0.248633	3.72879	4.39377	0
79	0.418269	0.0769231	0.423077	0.0817308	0	7939.01	0.0778807	3.88221	0.0333191	0.061396	3.28969	3.86675	0
79	0	0	0.320574	0.679426	0	8012.68	0.275086	4.42198	0.0681958	0.423142	2.75022	3.856	0
79	0	0	0.10628	0.89372	0	7980.5	0.311209	4.20187	0.108508	0.393544	3.14891	3.91831	0
79	0.213592	0.0436893	0.616505	0.0776699	0	7998.29	0.0305093	3.17458	0.0157093	0.0847091	1.66008	2.18606	0.0132919
79	0.225962	0	0.649038	0.120192	0	8021.28	0.0818657	2.45861	0.0163556	0.0908202	1.76202	2.14874	0.00362393
79	0.391304	0	0.57971	0.0289855	0	8019.66	0.0729509	2.63357	0.0258941	0.0635499	1.50713	2.16471	0.0408722
79	0.0574163	0	0.91866	0.0239234	0	8046.6	0.0989316	2.48736	0.00164624	0.160692	1.60544	2.27656	0.0231519
79	0.0432692	0	0.942308	0.0144231	0	8050.25	0.115183	2.53418	0.00111089	0.167741	1.55258	2.32216	0.0313843
79	0.0333333	0.0238095	0.857143	0.0857143	0	8067.56	0.131644	1.8832	0.00753362	0.185811	2.3562	2.64892	0
79	0.105263	0	0.784689	0.105263	0	8035.4	0.079379	2.36484	0.00701332	0.126056	1.82905	2.20894	0.00032397
79	0	0.00956938	0.880383	0.110048	0	8032.83	0.24193	2.30793	0.00329017	0.244881	0.779902	1.50829	0.825371
79	0.0428571	0.052381	0.795238	0.0619048	0	8012.2	0.0325755	3.08104	0.00597734	0.166199	1.68126	2.30018	0.00788912
79	0	0.00970874	0.936893	0.0533981	0	8041.07	0.342017	2.07331	0.0013719	0.342212	0.729983	1.55691	0.83532
79	0.478673	0.0616114	0.336493	0.109005	0.014218	8003.1	0.0777538	2.70784	0.0656858	0.0463706	0.857692	2.1015	0.462488
79	0.456731	0.125	0.355769	0.0384615	0.0240385	7973.18	0.0715441	3.07749	0.0450622	0.0441279	0.203394	0.721857	0.646981
80	0.177033	0.0143541	0.727273	0.0813397	0	7921.51	0.0841	3.95185	0.0153026	0.09635	0.712655	4.36897	0.351625
80	0.1	0.0380952	0.814286	0.047619	0	7907.51	0.0493768	4.43505	0.00723021	0.127612	1.26922	3.52994	0.193816
80	0	0	1	0	0	7974.56	0.229354	2.96048	0	0.769991	0.238199	3.46852	0.711884
80	0	0	1	0	0	7964.25	0.320802	3.05032	0	0.511605	0.420347	3.42208	0.688109
80	0	0	0.21256	0.78744	0	7989.69	0.383445	4.09145	0.109593	0.396055	3.41613	4.29711	0
80	0	0	0.990431	0.00956938	0	8033.84	0.0808742	2.0665	0.000238095	2.06676	2.40081	8.26449	0
80	0	0.0809524	0.842857	0.0619048	0	7984.01	0.0413963	2.13002	0.0043063	1.52758	1.51909	8.55171	0.0268123
80	0	0	0.971154	0.0288462	0	8052.13	0.185506	2.1542	0.000849515	2.06644	2.26469	8.4106	0
80	0	0	1	0	0	7972.07	0.47449	2.10568	0	1.02962	2.44514	7.25164	0
80	0	0	1	0	0	7973.1	0.483876	2.0579	0	1.04841	2.46932	7.25759	0
81	0.841346	0.0528846	0.0192308	0.0144231	0.00480769	8065.73	0.0284434	3.48874	0.174565	0.00418611	2.85735	1.41366	0.112809
81	0	0.0144231	0.908654	0.0769231	0	8180.05	0.108089	1.01863	0.00214286	2.5813	2.76651	4.27603	0
81	0	0	0.985646	0.0143541	0	8206.42	0.391267	1.03471	0.000595238	2.69488	2.84228	4.51203	0
81	0	0	0.985437	0.0145631	0	8275.9	0.392233	0.909648	0.000478469	2.83403	2.57117	4.67765	0
81	0	0	0.564593	0.435407	0	8105.58	0.0822532	1.05533	0.014102	1.57371	3.88019	3.62685	0
81	0	0	0.874396	0.125604	0	8161.25	0.12263	1.97225	0.00427297	1.08955	3.55963	2.25798	0
81	0	0	0.861905	0.138095	0	8162.97	0.0789052	1.78135	0.00451874	1.19217	3.49118	2.37448	0
81	0	0	0.712919	0.272727	0	8139.78	0.308754	1.37202	0.00961011	1.36605	3.34154	2.84742	0
81	0	0	0.904306	0.0669856	0	8120.09	0.139217	1.27318	0.00379125	1.52645	3.353	3.13395	0
81	0	0	0.879227	0.120773	0	8213.19	0.871022	1.93788	0.0029986	0.826908	2.84257	0.773515	0.112809
81	0	0	0.961538	0.0384615	0	8139.39	0.493047	2.64933	0.00100648	0.567217	3.10484	1.75418	0.0303716
81	0	0	0.941748	0.0582524	0	8247.35	0.542243	1.22476	0.00175692	1.25898	3.51785	1.86212	0.00213856
81	0	0	1	0	0	8401.13	0.204207	1.82718	0	0.71025	3.62604	11.7385	0
81	0	0	0.875	0.125	0	8137.68	0.211392	3.68331	0.0029986	0.222097	1.80962	1.94726	0.000674037
81	0	0.0191388	0.861244	0.100478	0	8319.7	0.183549	0.363519	0.003681	1.76246	3.15405	1.19334	0.112809
81	0	0	0.644231	0.173077	0	8169.29	0.0426987	2.5808	0.011007	1.06429	0.368664	7.47466	0.325742
81	0	0.00952381	0.92381	0.0619048	0	8141.29	0.15308	3.08355	0.00237182	0.239332	0.865307	6.8401	0.36076
81	0	0.105769	0.653846	0.240385	0	8349.51	0.487963	0.509969	0.0109808	2.69677	1.42198	3.93577	0.0456603
81	0	0	1	0	0	8103.61	0.4766	2.70005	0	0.686155	3.9111	2.83765	0
81	0	0	0.653846	0.346154	0	8168.16	0.377094	1.52223	0.0131522	1.04501	3.9147	2.95667	0
81	0.524272	0.0873786	0.00970874	0	0.359223	8296.48	0.0250231	2.99909	0.196316	0.013534	3.6891	10.8312	0
81	0	0	0.778846	0.221154	0	8133.33	0.33312	2.49597	0.00665524	0.408324	3.31055	3.08114	0
81	0	0	0.895238	0.104762	0	8130.28	0.25216	1.22453	0.00239234	1.78162	3.18068	3.39748	0
81	0	0	0.870192	0.129808	0	8126.34	0.258428	1.23734	0.00324519	1.82776	3.20542	3.4735	0
81	0	0	0.980861	0.0191388	0	8104.25	0.0780055	1.91022	0.000480769	1.13544	3.72316	2.77072	0
82	0	0.119617	0.449761	0.0287081	0	8143.29	0.0556547	2.10905	0.0366812	1.09378	2.35173	4.10577	0
82	0	0.0047619	0.42381	0.0190476	0	8150.82	0.0533024	2.41698	0.0306781	1.08705	1.23845	4.89596	0.0576619
82	0	0.0616114	0.393365	0.07109	0	8142.56	0.0585867	2.84664	0.0307003	1.03389	0.912885	5.51451	0.13293
82	0	0.0287081	0.416268	0.0334928	0	8145.47	0.0528427	2.81622	0.0487026	1.13437	0.985852	5.41132	0.113735
82	0	0.149758	0.202899	0.0531401	0	8125.59	0.0495258	2.44732	0.0561279	0.661885	2.37136	4.55098	0
82	0	0.0380952	0.671429	0.0714286	0	8132.05	0.0481206	2.51995	0.0122009	0.895309	3.07583	4.94771	0
82	0	0.305825	0.0873786	0	0.0582524	8118.71	0.0922679	3.62669	0.095083	0.28017	2.37094	5.74183	0
82	0	0.0721154	0.216346	0.225962	0	8121.31	0.0866211	3.55957	0.0417173	0.725932	2.42397	6.1671	0
82	0	0	1	0	0	8316.41	0.159441	0.413787	0	2.66819	2.16175	3.11267	0
82	0	0	0.698565	0.301435	0	8113.81	0.116368	2.3094	0.0101085	2.30122	4.41766	7.61863	0
82	0	0.289855	0.0869565	0	0.0338164	8125.14	0.155212	3.54861	0.0851498	0.278239	2.23442	5.64227	0
82	0	0.0144928	0.821256	0.0531401	0	8122.59	0.249001	3.30375	0.00535454	0.392929	2.40815	8.24487	0
82	0	0	0.995192	0.00480769	0	8242.42	0.428106	1.17593	0	0.375109	4.88986	5.30142	0
82	0	0	0.985577	0.0144231	0	8462.04	0.157662	1.04741	0.000360577	1.78274	2.166	9.0571	0
82	0.139423	0.115385	0.605769	0.139423	0	8277.02	0.0464478	3.8571	0.0196832	0.116536	0.348916	4.02822	0.0747783
82	0	0.0382775	0.727273	0.23445	0	8409.28	0.0818733	1.59902	0.00820999	1.3575	2.14665	8.20742	0
83	0	0.0628019	0.516908	0.154589	0	8123.76	0.0657115	3.36493	0.0243738	0.761138	1.28085	7.50068	0.238267
83	0	0.0721154	0.774038	0.0432692	0	8124.57	0.0742531	3.44491	0.00749659	0.614746	1.4325	7.77273	0.173586
83	0	0.0571429	0.690476	0.190476	0	8132.75	0.0848692	3.13572	0.00883421	0.909605	1.09406	7.73222	0.24443
83	0	0.0430622	0.827751	0.0239234	0	8123.57	0.0697021	3.47338	0.00474583	0.670146	1.4213	7.64433	0.181253
83	0	0	1	0	0	8259.39	0.648296	1.50475	0	0.495107	2.73232	8.2076	0
83	0	0	1	0	0	8227.91	0.688645	1.69343	0	0.442603	3.57167	7.01404	0
83	0	0	1	0	0	8254.25	0.354161	1.03794	0	0.871248	2.92975	7.99017	0
83	0	0	1	0	0	8157.25	0.207841	2.27188	0	1.32653	3.42034	4.72189	0
83	0	0	1	0	0	8236.32	0.251702	0.899596	0	1.02226	3.75254	7.1661	0
83	0.0144231	0	0.947115	0.0384615	0	8185.07	0.364118	2.72899	0.0011813	0.186643	2.76331	6.2687	0
83	0	0	1	0	0	8199.64	0.600289	2.55544	0	0.530244	2.92906	6.17836	0
83	0	0.00956938	0.866029	0.124402	0	8421.78	0.137145	1.17303	0.00395508	1.66481	3.7524	13.1873	0
83	0	0.0483092	0.613527	0.309179	0	8286.03	0.0552949	1.47277	0.0128931	0.989833	1.65009	12.4531	0.0100829
83	0	0.0239234	0.961722	0.0143541	0	8567.2	0.0858809	1.38781	0.00101621	1.00566	5.1846	10.1119	0
83	0	0	0.990476	0.00952381	0	8433.39	0.130515	1.53264	0.000241546	1.12057	4.11962	11.3145	0
83	0	0.0240385	0.875	0.100962	0	8200.75	0.0616411	1.69983	0.00299043	0.825236	3.44708	9.90385	0
83	0.0432692	0.0865385	0.692308	0.173077	0	8438.09	0.165651	1.76371	0.0119101	0.15931	2.33438	11.3834	0
83	0	0	0.922705	0.0772947	0	8462.26	0.411703	1.75594	0.00180288	0.455814	1.62636	12.3917	0.00990721
83	0	0.0047619	0.871429	0.109524	0	8165.19	0.211334	2.44664	0.0036818	0.980579	1.57253	4.55617	0.0146474
83	0	0	1	0	0	8239.87	0.628434	1.94145	0	0.291482	2.53162	8.45284	0
83	0	0	1	0	0	8269	0.703778	1.89102	0	0.477449	2.40343	8.54461	0
83	0	0.0853081	0.701422	0.0521327	0	8120.5	0.0556204	3.81779	0.0113805	1.04544	2.55344	7.07115	0
83	0	0.105769	0.509615	0	0	8116.35	0.0507646	3.83801	0.0335209	0.805099	2.33198	7.07691	0
83	0	0.00961538	0.850962	0.0336538	0	8122.71	0.0902383	3.78055	0.00476829	0.929406	2.42524	6.96488	0
83	0	0	0.774038	0.192308	0	8104.83	0.233582	3.1523	0.00828781	2.06187	3.85825	7.75098	0
83	0	0	0.458937	0.0434783	0	8110.99	0.12577	3.42503	0.0271674	0.682167	2.70723	8.16634	0
83	0	0	1	0	0	8199.63	0.593599	2.36789	0	0.408696	3.03144	6.44021	0
83	0	0	0.883495	0.116505	0	8106.74	0.104896	2.56049	0.00318862	2.07873	4.13239	7.44062	0
83	0	0	0.835749	0.164251	0	8106.74	0.0712875	2.62183	0.00481968	2.14725	4.15906	7.54192	0
84	0	0	1	0	0	8307.81	0.108573	2.25469	0	0.626822	1.25707	3.05841	0.0671127
84	0.0192308	0.105769	0.701923	0.0961538	0.0240385	8216.07	0.15954	2.09501	0.0126727	0.154811	0.192992	1.19752	1.08406
84	0.188406	0.0869565	0.483092	0.173913	0.0289855	8213.69	0.0411391	2.42577	0.0233177	0.075453	0.495932	1.39591	0.854831
84	0.26087	0.10628	0.415459	0.115942	0.0241546	8211.91	0.0433494	2.24013	0.0285857	0.0686932	0.357474	1.14191	0.978804
84	0	0	0.947368	0.0526316	0	8242.68	0.269856	1.95275	0.00113152	0.286846	0.0591375	1.0608	1.27487
84	0.0193237	0.149758	0.275362	0.299517	0	8355.9	0.0995996	1.19446	0.035584	0.16285	2.50849	12.9928	0
84	0	0	0.912621	0.0873786	0	8447.21	0.282804	1.81695	0.00197286	0.43242	1.09216	10.7376	0.0365307
84	0	0	0.985646	0.0143541	0	8434.82	0.495614	2.71695	0.000357143	0.444922	2.07862	10.9201	0
84	0	0	1	0	0	8473.2	0.304113	2.94453	0	0.353778	1.79691	10.7412	0.00501143
84	0	0	0.980769	0.0192308	0	8499.81	0.187397	3.14857	0.000600962	0.212996	1.46456	10.8126	0.0669518
84	0	0	1	0	0	8509.73	0.176837	3.09116	0	0.252192	1.3472	11.2153	0.092444
84	0	0	1	0	0	8557.86	0.0561589	2.81102	0	0.326222	2.37704	12.3179	0
84	0	0	1	0	0	8570.5	0.127414	3.8519	0	0.403532	2.00047	12.5802	0
84	0	0	0.990385	0.00961538	0	8200.86	0.0574502	5.39591	0	0.299065	0.971658	1.95369	0.188062
84	0	0	0.995192	0.00480769	0	8158.94	0.0438098	2.02682	0.000119048	1.65558	0.114839	0.201462	9.14803
84	0	0.00961538	0.990385	0	0	8285.46	0.277811	2.90837	0.000358852	0.311382	1.36805	3.73258	0.0336145
84	0	0	0.802885	0.100962	0	8178.72	0.325601	1.96929	0.00488664	1.53353	0.510453	5.00495	0.140333
84	0	0	0.875	0.125	0	8137.68	0.211392	3.68331	0.0029986	0.222097	1.80962	1.94726	0.000674037
84	0	0	0.760766	0.239234	0	8195.69	0.493113	0.924393	0.00724924	3.07078	5.33164	5.89024	0
84	0	0.0528846	0.451923	0.00961538	0.00961538	8141.23	0.0474296	2.00037	0.0223197	1.21024	2.76774	4.09028	0
84	0	0.0526316	0.401914	0	0	8104.94	0.131684	3.53859	0.0313764	1.85645	3.39587	7.5468	0
84	0	0.0704225	0.276995	0.0328638	0.0140845	8104.42	0.0876956	3.1422	0.0425402	1.74421	3.64154	8.02581	0
85	0.194175	0.0825243	0.296117	0.373786	0.0194175	8115.48	0.181953	1.36114	0.0353563	0.104554	3.03164	1.66211	0.0664865
85	0.405797	0.115942	0.222222	0.241546	0	8108.69	0.0927815	1.53273	0.0467945	0.0521299	3.08984	1.75182	0.0349171
85	0	0	0.54067	0.421053	0	8124.66	0.40403	1.191	0.0189645	0.227507	2.7561	1.49646	0.112809
86	0	0.109524	0.438095	0.209524	0	8138.15	0.245448	2.91549	0.0248904	0.745959	0.828627	5.8329	0.206136
86	0	0.00956938	0.674641	0.0526316	0	8118.06	0.107975	2.97788	0.0192779	0.975858	3.37794	6.0145	0
86	0	0	0.884058	0.0434783	0	8139.17	0.0527303	2.37623	0.00349333	1.08061	3.18244	4.76138	0
86	0	0	1	0	0	8162.38	0.339451	2.20415	0	1.47516	3.57	4.72605	0
86	0	0	0.894737	0.105263	0	8152.09	0.126191	2.06682	0.00329248	1.45046	3.40203	4.42651	0
86	0	0	0.913876	0.0430622	0	8125.57	0.0650492	2.91097	0.00218213	0.894866	3.27049	5.60447	0
86	0	0.0625	0.341346	0.00961538	0	8105.91	0.0552013	3.3352	0.0370632	0.859367	2.86408	8.13876	0
86	0	0.0721154	0.461538	0	0	8123.36	0.0711993	3.67727	0.0505735	0.889484	2.31048	6.77239	0
86	0	0.135266	0.101449	0.0193237	0.00966184	8106.85	0.139317	3.28013	0.0683591	0.727508	3.0585	6.06424	0
86	0	0.202899	0.483092	0.0676329	0.00483092	8116.11	0.0412169	3.83111	0.0251465	1.18082	2.69125	7.16448	0
86	0	0	0.990431	0.00956938	0	8197.83	0.348501	2.00155	0.000119617	0.980368	0.0824121	6.68897	0.380685
86	0	0	0.885167	0.0191388	0	8197.45	0.433885	1.78474	0.00320395	1.55167	0.405806	4.97952	0.148962
86	0	0	0.774038	0.225962	0	8095.86	0.440036	2.70732	0.00624661	0.721374	5.63495	5.02511	0
86	0.028169	0.00938967	0.896714	0.0657277	0	8150.31	0.129164	3.59261	0.0029344	0.148718	1.72532	2.74727	0.00295706
86	0	0.0187793	0.84507	0.00938967	0	8172.12	0.0859355	2.18762	0.00583387	0.879295	0.306049	5.69075	0.252255
86	0	0	0.932692	0.0384615	0	8196.65	0.371334	1.85785	0.00161229	1.36695	0.242805	5.17054	0.172901
86	0	0.0428571	0.380952	0.147619	0	8140.46	0.0893289	2.75572	0.0289449	1.01142	0.76512	5.54585	0.156535
86	0	0.105769	0.653846	0.240385	0	8349.51	0.487963	0.509969	0.0109808	2.69677	1.42198	3.93577	0.0456603
87	0.0338164	0.0676329	0.777778	0.0724638	0.0289855	8283.03	0.0949967	1.43667	0.00589877	0.116349	0.675889	2.68158	0.490312
87	0	0.0428571	0.87619	0.0809524	0	8326.05	0.0668315	1.39208	0.00324015	0.417834	0.411142	2.34664	0.46861
87	0	0.0628019	0.879227	0.0289855	0	8174.17	0.0731788	2.36566	0.00337935	0.915609	2.7339	8.77589	0
87	0	0.0430622	0.215311	0.0239234	0	8104.29	0.0641829	3.19593	0.0444921	1.79222	3.62507	7.91748	0
87	0	0	1	0	0	8202.79	0.250268	1.87163	0	0.921141	3.22149	6.15373	0
87	0.0144231	0	0.947115	0.0384615	0	8185.07	0.364118	2.72899	0.0011813	0.186643	2.76331	6.2687	0
87	0	0	1	0	0	8199.64	0.600289	2.55544	0	0.530244	2.92906	6.17836	0
87	0	0.0380952	0.590476	0	0	8146.61	0.168605	2.63639	0.0175253	0.993122	2.92008	8.71186	0
87	0	0.0434783	0.884058	0.0724638	0	8316.12	0.0947449	1.43026	0.00320914	0.358181	0.495467	2.43869	0.43751
87	0	0	0.932367	0.0676329	0	8308.54	0.113354	1.8155	0.00174085	0.387505	0.923639	2.85066	0.326324
87	0	0	1	0	0	8259.47	0.423608	2.90842	0	0.48612	1.64238	3.09165	0.00786022
87	0	0.0193237	0.961353	0.0193237	0	8282.69	0.286435	2.67659	0.000721154	0.211144	1.50201	3.66436	0.0391012
87	0	0.0142857	0.914286	0.0714286	0	8318.99	0.0722131	1.35549	0.00197286	0.30359	0.551978	2.49677	0.636517
87	0	0	0.9375	0.0625	0	8200.55	0.0443676	2.71431	0.00149209	0.638943	1.87639	2.07595	0
87	0	0	1	0	0	8401.13	0.204207	1.82718	0	0.71025	3.62604	11.7385	0
87	0	0	1	0	0	8203.45	0.0763497	3.08182	0	0.553238	1.33157	1.53608	0.287474
87	0	0	0.985437	0.0145631	0	8440.42	0.453076	0.937557	0.000236967	1.48388	4.07082	12.3202	0
87	0	0.00473934	0.862559	0.132701	0	8261.4	0.681426	1.24213	0.00325869	1.76465	0.33388	0.735725	1.39971
87	0	0.00966184	0.985507	0.00483092	0	8245.65	0.536595	1.31879	0.000240385	2.03218	0.307463	0.688491	1.28491
87	0	0	0.846154	0.120192	0	8348.68	0.772592	0.85032	0.0034689	1.66342	0.270777	1.18277	1.97973
87	0	0	0.942857	0.0571429	0	8217.8	0.0555883	2.37654	0.0013719	0.899788	1.81396	2.09722	0.000129928
87	0	0.0144231	0.894231	0.0913462	0	8314.58	0.0775093	1.36748	0.00262361	0.271798	0.561957	2.52474	0.615146
87	0	0	0.990385	0	0	8348.08	0.0383988	1.64338	0.000240385	0.619214	0.630066	2.49663	0.335441
87	0	0	0.895238	0.0190476	0	8319.57	0.102877	1.86228	0.00262361	0.630381	0.872511	2.72845	0.287265
87	0	0	0.947368	0.0526316	0	8294.79	0.326173	2.24005	0.00119048	0.584222	0.896228	3.46146	0.142569
87	0	0	0.966019	0.0339806	0	8377.71	0.438141	1.23658	0.000717703	1.52331	0.329227	2.31851	0.781337
87	0	0.109524	0.747619	0.119048	0	8208.09	0.0752946	0.980995	0.00736241	2.04604	0.0296374	2.35741	1.78801
88	0	0.00485437	0.640777	0.26699	0	8268.54	1.01465	0.303945	0.0161299	1.72575	0.123714	0.91808	1.55926
88	0	0.00970874	0.752427	0.228155	0	8240.91	1.03601	0.438427	0.00606794	1.44083	0.124639	1.12225	1.55934
88	0	0.00961538	0.783654	0.197115	0	8238.29	1.04445	0.480078	0.00510571	1.41012	0.113118	1.13306	1.56039
88	0	0.00480769	0.644231	0.264423	0	8270.57	1.02517	0.304491	0.015019	1.73485	0.115142	0.918254	1.56175
88	0	0.00956938	0.760766	0.220096	0	8240.68	1.03991	0.439947	0.00601015	1.43843	0.123709	1.12523	1.55964
88	0	0	0.855769	0.115385	0	8335.8	1.13196	0.305845	0.00428568	1.92139	0.163942	0.907298	1.45972
88	0	0	0.865385	0.105769	0	8302.59	1.14939	0.316709	0.00387532	1.87217	0.102534	0.931429	1.50814
88	0	0	0.971154	0.0288462	0	8255.42	0.225573	1.61925	0.000600962	0.649645	0.520611	1.84875	0.662606
88	0	0.0430622	0.215311	0.0239234	0	8104.29	0.0641829	3.19593	0.0444921	1.79222	3.62507	7.91748	0
88	0	0.0769231	0.230769	0.0144231	0	8105.17	0.0674453	3.57798	0.0462509	1.61025	3.21713	7.53509	0
88	0	0	0.904306	0.0956938	0	8214.89	0.115771	2.09386	0.00259053	0.362594	0.108074	0.903106	1.28606
88	0	0	0.961722	0.0382775	0	8378.25	0.204353	0.907336	0.000595238	0.476826	0.243155	0.48612	1.11088
88	0	0	1	0	0	8330.27	0.319873	1.02296	0	0.244839	0.0889757	2.78889	0.304477
88	0	0	1	0	0	8248.12	0.124657	3.02847	0	0.500361	0.16226	0.691886	1.31281
88	0.177885	0.0865385	0.677885	0.0576923	0	8280.41	0.119743	2.95511	0.0123387	0.120758	0.719143	1.69253	0.499692
88	0.178744	0.0531401	0.63285	0.0724638	0	8167.12	0.373981	1.94747	0.0253048	0.0941662	3.54533	7.28674	0
88	0	0.00938967	0.361502	0.0234742	0	8151.01	0.045282	2.56618	0.045095	1.18231	1.10322	5.09724	0.0802534
88	0	0.0961538	0.355769	0	0	8123.19	0.0629253	3.63968	0.0646329	0.809145	2.21919	6.70058	0
88	0	0.0240385	0.432692	0	0.0144231	8105.02	0.0510538	3.00861	0.0297092	1.57666	3.61426	8.40058	0
88	0	0	0.923077	0.0769231	0	8356.55	1.09422	0.309248	0.00199202	1.95376	0.2833	0.998224	1.39718
88	0	0.0892019	0.70892	0.0328638	0	8122.77	0.0749001	3.77878	0.0161211	0.98838	2.46826	6.95669	0
88	0	0.0193237	0.613527	0.144928	0	8104.97	0.15159	3.26269	0.0185596	2.05326	3.70026	7.58432	0
88	0	0.10628	0.396135	0.0628019	0	8103.36	0.0824145	3.02887	0.0376563	1.56196	3.47535	7.03779	0
88	0	0	0.649038	0.201923	0	8104	0.17893	3.13662	0.0139989	2.00646	3.83667	7.83754	0
91	0.495192	0.139423	0.221154	0.0480769	0.0576923	7925.31	0.0361774	2.16351	0.0984329	0.0288349	0.640679	1.74676	1.04469
91	0.0478469	0.0287081	0.818182	0.105263	0	7931.21	0.0594289	2.27549	0.00514976	0.111776	0.598939	1.94502	0.989497
91	0.0673077	0	0.778846	0.153846	0	7935.18	0.0653468	2.28705	0.00749843	0.109076	0.528548	2.03117	1.01055
91	0.0289855	0	0.917874	0.0531401	0	7944.07	0.11731	2.23413	0.00219985	0.172322	0.474823	1.91439	1.00743
91	0.140777	0.0776699	0.674757	0.0679612	0.0291262	7931.24	0.0590486	2.21458	0.0172332	0.0887775	0.659546	1.77822	0.993367
91	0.07109	0.0521327	0.767773	0.109005	0	7928.77	0.0520869	2.28544	0.00744944	0.100234	0.612787	1.96221	0.989871
91	0	0	0.976077	0.0239234	0	8043.15	0.54904	1.11714	0.000714286	1.03935	0.0684288	0.548159	4.53395
91	0.014218	0.028436	0.853081	0.0900474	0	7973.43	0.207214	1.54837	0.00422675	0.194998	0.177373	0.979738	4.26798
91	0	0	1	0	0	7985.92	0.283158	1.52051	0	0.284616	0.118971	0.809637	4.01261
91	0	0	0.961353	0.0386473	0	8336.57	0.0803945	1.17764	0.000961538	1.73687	2.84726	12.7761	0
91	0	0.0240385	0.932692	0.0432692	0	8373.31	0.194839	1.26291	0.00161229	1.68096	3.13989	12.7424	0
91	0	0	1	0	0	8431.96	0.200472	1.2072	0.000119048	1.16498	3.98979	11.6633	0
91	0	0.0143541	0.980861	0.00478469	0	8409.16	0.085509	1.46173	0.000480769	0.942808	3.84199	11.6609	0
91	0	0.0145631	0.864078	0.121359	0	8502.92	0.270344	1.02356	0.00343223	1.99576	4.3027	12.7195	0
91	0	0	0.990431	0.00956938	0	8527.69	0.0789975	1.38323	0.000241546	0.578127	4.72958	10.548	0
91	0	0	0.980952	0.0190476	0	8652.11	0.135383	1.08455	0.00076725	1.54302	4.87264	10.9704	0
91	0.0825243	0.0825243	0.694175	0.140777	0	8289.55	0.066161	1.95196	0.00971917	0.0923543	0.431375	8.5742	0.430028
91	0	0.173077	0.605769	0.221154	0	8422.35	0.146754	1.29071	0.0161253	1.51608	3.25756	13.417	0
91	0	0.0576923	0.706731	0.0288462	0	8167.25	0.0485209	1.92812	0.0106392	0.941296	0.148494	5.73951	0.267086
91	0.211538	0.0144231	0.634615	0.125	0	7950.84	0.112351	1.88586	0.0161078	0.0980336	0.288108	1.28399	1.87425
91	0	0	1	0	0	8034.97	0.825447	1.20109	0	0.835814	0.275564	0.295497	6.22949
91	0	0	0.995169	0.00483092	0	8208.02	0.354877	1.32737	0.000119617	2.24943	0.368392	0.545535	1.47737
93	0.1875	0.0528846	0.721154	0.0384615	0	8263	0.133061	1.69549	0.0169164	0.109734	2.52352	4.18883	0
93	0.304762	0.0428571	0.642857	0.00952381	0	8211.69	0.0928065	1.9307	0.0110189	0.0729508	3.22064	4.45669	0
93	0.0480769	0.0480769	0.865385	0.0384615	0	8107.03	0.075552	2.8889	0.0041641	0.142949	2.69304	4.20073	0
93	0	0.0241546	0.801932	0.173913	0	8094.78	0.0568662	1.58279	0.00594775	0.348076	2.21157	2.88351	0
93	0	0.0240385	0.894231	0.0817308	0	8101.22	0.0760639	1.5697	0.00295577	0.386731	2.27536	2.94766	0
93	0.0619048	0.2	0.590476	0.133333	0	8109.21	0.14367	1.97903	0.0144516	0.0877959	2.42093	4.29359	0
93	0.370192	0.0192308	0.475962	0.134615	0	8195.63	0.24314	2.29934	0.0278131	0.0501963	1.96231	3.88561	0
93	0	0	0.995261	0.00473934	0	8086.24	0.0776494	1.89475	0.000120192	0.253268	2.44285	4.16429	0
93	0.0143541	0.119617	0.799043	0.0669856	0	8128.81	0.197354	2.22829	0.00532121	0.171706	1.96324	3.74685	0
93	0	0.0144231	0.836538	0.149038	0	8144.33	0.107207	1.50033	0.00422444	0.473341	3.80697	5.39107	0
93	0	0	0.990385	0.00961538	0	8244.71	0.474417	1.29701	0.000240385	0.997628	4.30845	5.56016	0
93	0	0	1	0	0	8199.49	0.0785471	2.47182	0	0.744186	0.0948317	0.607516	1.31826
93	0	0	1	0	0	8206.56	0.0620247	2.68169	0	0.819472	0.134833	0.402719	1.33222
93	0	0	1	0	0	8250.62	0.0824287	1.22107	0	1.26876	3.89383	4.56089	0
93	0.183575	0.299517	0.251208	0.246377	0.0193237	8080.05	0.0883049	1.96035	0.0422505	0.0515687	2.3954	4.29777	0
93	0	0.0576923	0.855769	0.0865385	0	8358.59	0.156466	1.37369	0.00399551	1.46648	3.22906	12.5854	0
93	0	0	0.947368	0.0526316	0	8339.45	0.0753066	1.17568	0.00119617	1.76283	2.91741	12.7899	0
93	0	0	1	0	0	8144.53	0.4771	1.21313	0	1.5263	0.0616984	0.568553	1.95758
93	0	0.0239234	0.789474	0.119617	0	8121.53	0.511817	2.04817	0.00486326	0.979533	1.35116	1.70093	0.185308
93	0	0	0.846154	0.134615	0	8331.76	0.365734	1.25911	0.00382553	2.4243	0.413628	2.33912	1.37321
93	0	0.0724638	0.391304	0	0.0144928	8103.98	0.0509225	3.16352	0.0318454	1.34199	3.35802	8.29103	0
95	0.133971	0.0191388	0.703349	0.138756	0.00478469	8335.67	0.0539452	2.04686	0.0119072	0.0957803	5.21749	9.04028	0
95	0	0	1	0	0	8414.05	0.195581	2.30879	0	0.336885	4.89608	8.71236	0
95	0.0287081	0.0143541	0.808612	0.148325	0	8329.99	0.0518999	1.96712	0.00604141	0.121311	5.17402	8.98944	0
95	0	0	1	0	0	8413.05	0.192798	2.30359	0	0.335224	4.88371	8.69874	0
95	0.0144928	0.101449	0.743961	0.120773	0.0193237	8352.32	0.0567374	2.07128	0.00899703	0.171825	4.93663	8.72584	0
95	0	0	1	0	0	8426.07	0.439144	2.87313	0	0.338791	4.7189	8.55312	0
95	0.0336538	0.134615	0.509615	0.322115	0	8353.29	0.0769718	2.53612	0.0243695	0.170705	4.33474	7.95426	0
95	0	0	0.850242	0.140097	0	8160.24	0.129747	1.64208	0.00536668	0.673463	2.05432	2.66966	0
96	0	0	1	0	0	8117.49	0.0700967	3.72147	0	0.245043	5.74396	7.12972	0
96	0	0	0.995192	0	0	8113.01	0.229178	4.04296	0.000240385	0.238252	6.59676	7.93456	0
96	0.0191388	0.110048	0.722488	0.124402	0.00478469	8105.27	0.0578925	3.65903	0.0179398	0.173672	5.63544	7.07508	0
96	0	0	0.879227	0	0	8182.46	0.217432	2.51572	0.00244189	1.09262	7.15186	8.15013	0
96	0.0582524	0.0582524	0.0339806	0.0679612	0	8156.22	0.0866222	2.58696	0.11232	0.128611	0.79254	1.78741	0.346293
96	0	0	0.849515	0.150485	0	8155.52	0.369693	3.01965	0.00554868	0.744017	6.96292	8.05274	0
96	0	0	0.966346	0	0	8160.91	0.265557	2.73854	0.000724638	0.863058	7.24225	8.28029	0
96	0	0	0.9375	0	0	8160.71	0.105197	2.69348	0.00162007	0.966269	7.44698	8.4522	0
96	0	0	0.952153	0.0382775	0	8124.84	0.0425347	2.81885	0.00107143	0.937088	5.3254	6.48246	0
96	0	0	1	0	0	8164.92	0.159635	2.15675	0	1.12335	4.59059	5.62945	0
96	0	0	0.995192	0	0	8124.64	0.117209	2.7631	0	1.25285	4.96025	6.09708	0
96	0	0	0.937799	0.062201	0	8104.16	0.0482963	3.69766	0.00135128	0.26432	4.9356	6.39607	0
96	0	0	0.665072	0.315789	0	8396.65	0.179688	2.39015	0.0102916	0.966474	12.1615	14.6857	0
96	0	0	1	0	0	8107.1	0.106853	3.04778	0	0.963844	4.64482	5.86382	0
96	0	0.0047619	0.990476	0.0047619	0	8112.56	0.120054	3.82124	0	0.429008	5.27422	6.67024	0
97	0.150485	0.208738	0.485437	0.126214	0	8080.55	0.128815	2.62452	0.0303039	0.112926	1.83977	3.6238	0.000174023
97	0	0	1	0	0	8122.89	0.215968	2.46029	0	0.28036	2.43469	4.09419	0
97	0.0191388	0.110048	0.722488	0.124402	0.00478469	8105.27	0.0578925	3.65903	0.0179398	0.173672	5.63544	7.07508	0
97	0	0.0628019	0.850242	0.0338164	0	8092.87	0.13859	2.10148	0.0033109	0.700606	3.28924	5.03209	0
97	0	0.00961538	0.961538	0.00961538	0	8113.14	0.0553861	2.06971	0.000961538	0.600074	3.91961	5.62595	0
97	0	0.0533981	0.81068	0.038835	0.00485437	8105.22	0.141091	2.37452	0.00561337	0.171176	4.50818	6.14513	0
97	0	0	0.852381	0.0333333	0	8104.81	0.0566544	2.32188	0.00448403	0.493199	4.0896	5.75806	0
97	0	0.0239234	0.712919	0.114833	0	8103.9	0.0784821	2.40109	0.00816875	0.617483	3.86618	5.54027	0
97	0	0	0.985507	0	0	8123.88	0.115706	2.39012	0.000360577	0.413421	2.3848	4.11062	0
97	0	0.0240385	0.9375	0.00961538	0	8123.81	0.191159	2.39079	0.00108173	0.503588	2.63663	4.355	0
97	0	0	0.995169	0	0	8118.35	0.15305	2.42675	0.000120192	0.264141	2.1806	3.91257	0
97	0	0	1	0	0	8121.02	0.181282	2.37998	0	0.302787	2.27987	3.97928	0
97	0	0	0.995146	0.00485437	0	8117.63	0.161407	2.3885	0.000469484	0.217957	2.30077	3.96346	0
97	0	0	0.975728	0.00970874	0	8124.04	0.123478	2.40343	0.000360577	0.324935	2.48634	4.24097	0
97	0	0	0.985577	0	0	8122.66	0.165597	2.38548	0.000360577	0.364557	2.32629	4.03718	0
97	0	0	0.947368	0.00956938	0	8124.71	0.2402	2.4756	0.00108173	0.584677	2.77266	4.47069	0
99	0	0	1	0	0	8106.61	0.204274	3.5775	0	0.629164	4.72027	6.09843	0
99	0	0	1	0	0	8131.39	0.241105	2.64644	0	0.639776	3.04197	4.66093	0
99	0	0.00956938	0.516746	0.220096	0	8118.5	0.0742665	2.4487	0.0134862	0.712578	3.57454	5.24033	0
99	0	0.00961538	0.961538	0.00961538	0	8113.14	0.0553861	2.06971	0.000961538	0.600074	3.91961	5.62595	0
99	0	0.00480769	0.894231	0.100962	0	8104	0.105107	3.53886	0.00377858	0.224484	4.76627	6.25308	0
99	0	0	0.852381	0.0333333	0	8104.81	0.0566544	2.32188	0.00448403	0.493199	4.0896	5.75806	0
99	0	0.0239234	0.712919	0.114833	0	8103.9	0.0784821	2.40109	0.00816875	0.617483	3.86618	5.54027	0
99	0	0	0.985507	0	0	8123.88	0.115909	2.39061	0.000360577	0.412133	2.3823	4.10828	0
99	0	0.0240385	0.9375	0.00961538	0	8123.81	0.191159	2.39079	0.00108173	0.503588	2.63663	4.355	0
99	0	0	0.995169	0	0	8118.35	0.15305	2.42675	0.000120192	0.264141	2.1806	3.91257	0
99	0	0	1	0	0	8121.02	0.181282	2.37998	0	0.302787	2.27987	3.97928	0
99	0	0	0.995146	0.00485437	0	8117.63	0.161407	2.3885	0.000469484	0.217957	2.30077	3.96346	0
99	0	0	0.975728	0.00970874	0	8124.04	0.123478	2.40343	0.000360577	0.324935	2.48634	4.24097	0
99	0	0	0.985577	0	0	8122.66	0.165597	2.38548	0.000360577	0.364557	2.32629	4.03718	0
99	0	0	0.947368	0.00956938	0	8124.71	0.2402	2.4756	0.00108173	0.584677	2.77266	4.47069	0
101	0.158654	0	0.836538	0.00480769	0	8319.87	0.117285	1.79344	0.00536059	0.12556	0.297698	1.0284	0.942004
101	0.0769231	0.0576923	0.653846	0.206731	0	8311.17	0.137917	2.12854	0.012028	0.149999	0.696406	1.3534	0.941603
101	0.0483092	0.144928	0.57971	0.227053	0	8305.05	0.167687	1.82716	0.0194634	0.117687	0.705181	1.74554	0.951506
101	0.328502	0.0144928	0.599034	0.057971	0	8290.73	0.0696146	1.8869	0.028833	0.0700217	0.624136	1.71144	0.932525
101	0	0.00961538	0.817308	0.0336538	0	8123.29	0.0930004	3.68836	0.00657379	0.72186	2.22027	6.83825	0
101	0	0.0576923	0.740385	0.134615	0	8126.5	0.0671016	3.27018	0.00724123	0.807966	1.22259	7.74719	0.223559
101	0	0.156398	0.459716	0.0189573	0.00947867	8114.98	0.0432527	3.84419	0.0375488	1.20837	2.69175	7.11582	0
101	0	0.10628	0.396135	0.0628019	0	8103.36	0.0824145	3.02887	0.0376563	1.56196	3.47535	7.03779	0
101	0	0.0144928	0.763285	0.15942	0	8138.5	0.088541	2.89851	0.00690929	0.934275	1.19771	8.33994	0.16347
101	0	0	0.504762	0.485714	0	8133.02	0.078997	3.114	0.0161052	0.70915	0.941679	7.37117	0.319275
101	0	0	0.69378	0.30622	0	8149.85	0.169139	2.93527	0.00933147	0.745976	0.770067	7.35382	0.331924
101	0	0	0.673077	0.235577	0	8156.52	0.109079	2.77141	0.00955687	1.07075	0.691907	7.66977	0.290074
101	0	0.00961538	0.634615	0.149038	0	8180.16	0.0480128	2.52978	0.0113124	1.14385	0.251217	7.49182	0.324551
101	0	0.0193237	0.439614	0.193237	0	8154.99	0.103624	2.39553	0.0237398	0.773882	1.13435	9.0862	0.0943435
101	0	0.0528846	0.490385	0.134615	0	8151.7	0.0675176	2.4167	0.0208682	0.89666	1.12256	8.95029	0.105703
101	0	0	1	0	0	8250.3	0.421077	1.87508	0	0.844039	1.8237	9.0961	0.000515425
101	0	0.00478469	0.770335	0.15311	0	8108.59	0.0920065	2.39264	0.00674148	1.55789	3.87031	6.67669	0
102	0	0	0.793269	0.206731	0	8114.86	0.139645	2.20928	0.00690011	0.99123	3.6462	2.42508	0
102	0	0	0.957746	0.0422535	0	8193.89	0.385159	1.04872	0.000721154	1.57079	3.10291	2.77803	0
102	0	0.0289855	0.816425	0.154589	0	8132.91	0.0778842	3.11254	0.00452606	0.891073	1.12672	7.89104	0.217979
102	0	0.0576923	0.740385	0.134615	0	8126.5	0.0671016	3.27018	0.00724123	0.807966	1.22259	7.74719	0.223559
102	0	0.0480769	0.701923	0	0	8137.05	0.23892	2.89495	0.0122274	0.823446	2.79244	8.5855	0
102	0	0.0288462	0.653846	0.0384615	0	8116.14	0.216836	3.22787	0.0143685	0.739003	2.76277	8.31787	0
102	0	0	0.458937	0.0434783	0	8110.99	0.12577	3.42503	0.0271674	0.682167	2.70723	8.16634	0
102	0	0.0241546	0.584541	0.101449	0	8132.12	0.0871434	3.02244	0.0190878	0.315279	1.94508	8.32884	0
102	0	0.105263	0.291866	0	0	8105.79	0.044624	3.21958	0.0420264	0.956607	2.98185	8.22526	0
102	0	0	0.69378	0.30622	0	8149.85	0.169139	2.93527	0.00933147	0.745976	0.770067	7.35382	0.331924
102	0.0192308	0.0240385	0.629808	0.235577	0	8184.48	0.281957	2.76577	0.0109022	0.193546	1.73113	9.3276	0.00316035
102	0	0.0193237	0.439614	0.193237	0	8154.99	0.103624	2.39553	0.0237398	0.773882	1.13435	9.0862	0.0943435
102	0	0.0528846	0.490385	0.134615	0	8151.7	0.0675176	2.4167	0.0208682	0.89666	1.12256	8.95029	0.105703
102	0	0	1	0	0	8250.3	0.421077	1.87508	0	0.844039	1.8237	9.0961	0.000515425
102	0	0.00478469	0.770335	0.15311	0	8108.59	0.0920065	2.39264	0.00674148	1.55789	3.87031	6.67669	0
104	0	0.0610329	0.807512	0.131455	0	8286.42	0.0861263	1.24821	0.00491025	1.31422	3.74114	4.4562	0
104	0.975845	0	0.0241546	0	0	8190.32	0.0772247	2.48001	0.1287	0.000653891	5.13785	7.42222	0
104	0	0	0.552885	0.423077	0	8322.82	0.329777	2.18165	0.0161993	0.303385	4.82242	6.12996	0
104	0	0.0865385	0.841346	0.0721154	0	8360.48	0.482553	2.09058	0.00372596	0.502116	4.72184	5.75227	0
104	0	0.101449	0.850242	0.0483092	0	8337.93	0.520178	2.07979	0.00339806	0.521478	4.79518	5.77518	0
104	0.0970874	0.0436893	0.626214	0.23301	0	8228.39	0.239811	2.12422	0.0118687	0.145439	5.04714	6.22629	0
104	0.75	0.0288462	0.206731	0.0144231	0	8179.37	0.0570326	2.20489	0.0833292	0.0156411	5.04455	6.62739	0
105	0.0142857	0.047619	0.861905	0.0761905	0	8185.2	0.132192	1.27337	0.00393364	0.204779	2.75011	3.3746	0
105	0	0	0.932367	0.0676329	0	8235.45	0.475361	2.47283	0.00159693	0.471874	0.423498	1.06914	0.322326
105	0	0	0.618357	0.381643	0	8283.35	0.322339	2.09567	0.0149368	0.307995	0.665459	1.27728	0.322326
105	0	0	0.777778	0.207729	0	8154.21	0.0984511	1.61638	0.00759025	0.568995	2.01484	2.64223	0
105	0	0.0191388	0.942584	0.0382775	0	8157.95	0.102403	1.34388	0.00120192	0.365743	2.5593	3.21211	0
105	0	0	0.947368	0.0526316	0	8125.32	0.0944712	1.86277	0.00120773	0.230354	1.54186	2.19696	0.0343468
105	0	0.00966184	0.845411	0.144928	0	8141.33	0.080763	2.01328	0.00411653	0.265209	1.18241	1.81048	0.126305
105	0.129808	0	0.807692	0.0625	0	8131.44	0.142308	2.40641	0.00259053	0.0930669	1.49103	2.1135	0.0485722
105	0	0	0.688995	0.311005	0	8296.69	0.264656	2.03688	0.0170059	0.444031	0.840227	1.42329	0.322326
105	0	0	1	0	0	8318.38	0.0984587	1.54871	0	0.678661	2.66727	3.40873	0
106	0	0.0285714	0.971429	0	0	8156.48	0.0825894	2.07159	0.000603865	0.840341	3.24423	4.7857	0
106	0.239437	0.122066	0.511737	0.126761	0	8070.19	0.0697796	3.2524	0.0313845	0.0905647	1.85688	3.23773	7.43737e-05
106	0	0.0191388	0.952153	0.0287081	0	8236.5	0.0790707	1.26499	0.0012891	1.35912	3.87957	4.55035	0
106	0	0.105769	0.509615	0	0	8116.35	0.0507646	3.83801	0.0335209	0.805099	2.33198	7.07691	0
106	0	0	0.975962	0.0240385	0	8196.83	0.0812938	1.05526	0.000480769	2.88906	4.32027	3.22628	0
106	0	0.0909091	0.210526	0.114833	0	8116.13	0.0836513	3.55314	0.041639	0.76936	2.55062	6.24715	0
106	0	0.0485437	0.436893	0	0	8104.77	0.115018	3.47511	0.02928	1.87507	3.442	7.59965	0
106	0	0.0241546	0.758454	0.193237	0	8106.65	0.0956492	2.33592	0.00856466	1.75597	3.94981	7.0244	0
106	0	0	0.751196	0.248804	0	8161.2	0.154937	2.61098	0.0094935	1.12286	0.408083	7.85312	0.275974
106	0	0.00480769	0.879808	0.0817308	0	8123.01	0.131791	2.89906	0.00280708	1.03168	3.43764	5.94332	0
106	0	0.00961538	0.879808	0.0913462	0	8106.82	0.118653	2.81477	0.00308952	1.98643	3.85233	7.4487	0
107	0.0384615	0.0625	0.759615	0.129808	0	8106.95	0.0807235	1.86522	0.00666602	0.146754	2.1759	2.83986	0
107	0	0.0334928	0.76555	0.200957	0	8200.89	0.0733339	1.5758	0.00663112	0.704657	2.473	3.09676	0
107	0	0	0.985507	0.0144928	0	8427.64	0.220734	1.47547	0.000239234	1.75359	3.95833	13.3215	0
107	0	0	0.980861	0.0191388	0	8421.53	0.0762215	1.21515	0.00047619	1.97447	3.92023	13.3465	0
107	0	0	0.975845	0.0241546	0	8462.3	0.595335	0.955439	0.000469484	1.56088	4.05036	12.5153	0
107	0	0	0.956938	0.0430622	0	8452.98	0.527798	1.16608	0.000961538	1.17682	3.58115	12.8521	0
107	0	0	0.890995	0.0995261	0	8323.77	0.0820872	1.50503	0.00278741	0.752704	4.80232	12.3656	0
107	0	0	0.947115	0.0528846	0	8343.57	0.0930366	1.46979	0.00113152	1.43411	5.49786	12.6744	0
107	0	0	0.910798	0.0892019	0	8357.26	0.440573	1.22256	0.00256554	1.70982	4.70323	11.5359	0
107	0	0.0528846	0.490385	0.134615	0	8151.7	0.0675176	2.4167	0.0208682	0.89666	1.12256	8.95029	0.105703
107	0	0	0.985577	0.0144231	0	8193.68	0.0791536	1.04154	0.000241546	2.88062	4.35672	3.31137	0
108	0.173077	0.110577	0.504808	0.192308	0.00961538	8080.3	0.121237	3.3089	0.0432861	0.104748	3.29135	1.84419	0.00705056
108	0	0	0.504808	0.495192	0	8103.7	0.0746509	1.10984	0.0193504	1.48957	3.89354	3.50859	0
108	0	0	0.957746	0.0422535	0	8193.89	0.385159	1.04872	0.000721154	1.57079	3.10291	2.77803	0
108	0	0	0.880952	0.109524	0	8149.43	0.108732	1.1441	0.00390882	1.67178	3.09273	3.19387	0
108	0	0	0.937198	0.0628019	0	8167.96	0.313047	1.33117	0.00190246	1.38647	3.28546	2.70772	0
108	0	0	0.757282	0.23301	0	8112.29	0.244062	1.68964	0.00819464	1.18379	3.54675	2.72336	0
108	0	0.0669856	0.497608	0.368421	0	8333.12	0.285337	0.914001	0.0308137	2.13811	1.81623	6.04414	0.0040834
108	0.125	0.0769231	0.447115	0.326923	0.00961538	8091.56	0.100298	3.18077	0.02442	0.11255	2.91998	1.5161	0.10847
108	0	0.0144928	0.922705	0.0628019	0	8192.04	0.126148	1.07327	0.00204327	1.8969	2.84345	3.31825	0
108	0	0	0.859903	0.140097	0	8077.16	0.145984	3.0462	0.00403164	0.342031	3.33895	1.90928	0
108	0.200957	0.0956938	0.38756	0.282297	0.00956938	8086.79	0.0879153	3.22548	0.0342515	0.0890854	2.88655	1.47989	0.112809
108	0	0	0.912621	0.0873786	0	8215.33	0.106001	1.42162	0.00200338	1.30584	3.40062	2.2829	0
108	0.173077	0.0240385	0.745192	0.0384615	0.00961538	8271.93	0.105249	1.29591	0.00931386	0.103018	4.2656	11.4922	0
108	0	0	0.937799	0.062201	0	8188.5	0.195944	1.86443	0.00166207	1.12493	3.54311	2.16579	0
108	0	0	0.895238	0.104762	0	8130.28	0.25216	1.22453	0.00239234	1.78162	3.18068	3.39748	0
108	0	0	0.870192	0.129808	0	8126.34	0.258428	1.23734	0.00324519	1.82776	3.20542	3.4735	0
108	0	0	0.980861	0.0191388	0	8104.25	0.0780055	1.91022	0.000480769	1.13544	3.72316	2.77072	0
108	0	0	0.941748	0.0582524	0	8123.28	0.25127	1.24585	0.00164319	1.74909	3.25685	3.39189	0
109	0	0	0.745192	0.254808	0	8116.47	0.304683	1.8504	0.00799444	1.12704	3.57212	2.62445	0
109	0	0	0.677885	0.264423	0	8118.42	0.0766807	1.28974	0.0126087	1.43631	3.37117	3.01397	0
109	0	0	0.957746	0.0422535	0	8193.89	0.385159	1.04872	0.000721154	1.57079	3.10291	2.77803	0
109	0	0	0.778846	0.211538	0	8147.75	0.306667	1.2866	0.00699455	1.43085	3.27578	2.90796	0
109	0	0	0.88835	0.11165	0	8168.32	0.136388	1.93249	0.00300508	1.10663	3.55235	2.23855	0
109	0	0	0.757282	0.23301	0	8112.29	0.244062	1.68964	0.00819464	1.18379	3.54675	2.72336	0
109	0	0.0628019	0.502415	0.36715	0	8334.13	0.286494	0.915363	0.0310812	2.13499	1.81699	6.04745	0.00444438
109	0.125	0.0769231	0.447115	0.326923	0.00961538	8091.56	0.100298	3.18077	0.02442	0.11255	2.91998	1.5161	0.10847
109	0	0.0144928	0.922705	0.0628019	0	8192.04	0.126148	1.07327	0.00204327	1.8969	2.84345	3.31825	0
109	0	0	0.859903	0.140097	0	8077.16	0.145984	3.0462	0.00403164	0.342031	3.33895	1.90928	0
109	0.200957	0.0956938	0.38756	0.282297	0.00956938	8086.79	0.0879153	3.22548	0.0342515	0.0890854	2.88655	1.47989	0.112809
109	0	0	0.912621	0.0873786	0	8215.33	0.106001	1.42162	0.00200338	1.30584	3.40062	2.2829	0
109	0.173077	0.0240385	0.745192	0.0384615	0.00961538	8271.93	0.105249	1.29591	0.00931386	0.103018	4.2656	11.4922	0
109	0	0	0.937799	0.062201	0	8188.5	0.195944	1.86443	0.00166207	1.12493	3.54311	2.16579	0
109	0	0	0.895238	0.104762	0	8130.28	0.25216	1.22453	0.00239234	1.78162	3.18068	3.39748	0
109	0	0	0.870192	0.129808	0	8126.34	0.258428	1.23734	0.00324519	1.82776	3.20542	3.4735	0
109	0	0	0.980861	0.0191388	0	8104.25	0.0780055	1.91022	0.000480769	1.13544	3.72316	2.77072	0
109	0	0	0.941748	0.0582524	0	8123.28	0.25127	1.24585	0.00164319	1.74909	3.25685	3.39189	0
111	0	0.0142857	0.761905	0.109524	0	8174.91	0.0329811	2.33526	0.00673931	0.943315	0.175914	7.10919	0.373106
112	0	0	1	0	0	8057.42	0.177245	2.58788	0	0.218124	1.52212	2.46611	0.035862
112	0	0	1	0	0	8057.42	0.177245	2.58788	0	0.218124	1.52212	2.46611	0.035862
112	0	0.0193237	0.613527	0.144928	0	8104.97	0.15159	3.26269	0.0185596	2.05326	3.70026	7.58432	0
112	0	0.0857143	0.190476	0	0	8105.01	0.174054	3.75518	0.0490698	1.80695	3.26991	7.35567	0
112	0	0.145631	0.179612	0.0145631	0	8105.7	0.161705	3.84982	0.0569298	1.6915	3.13083	7.29555	0
112	0	0.00480769	0.879808	0.0817308	0	8123.01	0.131791	2.89906	0.00280708	1.03168	3.43764	5.94332	0
112	0.042654	0	0.881517	0.056872	0	8146.77	0.157226	3.06652	0.0041966	0.179443	0.850656	6.72063	0.352789
112	0	0	0.990431	0.00956938	0	8317.51	0.590651	0.491529	0.000121359	2.02779	3.71821	1.51433	0.107904
114	0.00480769	0.125	0.740385	0.129808	0	8658.38	0.30689	2.78552	0.0159882	0.16505	3.78824	12.4395	0
115	0	0	1	0	0	8395.36	0.646802	1.10863	0	0.679879	1.29201	2.84095	0.103139
115	0	0	1	0	0	8410.73	0.527521	2.23384	0	0.560935	2.14972	3.81181	0
115	0.168269	0	0.75	0.0817308	0	8318.81	0.0909323	2.21967	0.0117027	0.104072	2.10343	8.36895	0
115	0	0	0.980952	0.0190476	0	8339.56	0.234838	2.07495	0.000478469	0.267288	2.13174	8.16267	0
115	0.0434783	0.0241546	0.869565	0.0628019	0	8325.26	0.138502	2.30318	0.005346	0.155545	1.83088	8.45029	0.000215409
115	0	0.0333333	0.861905	0.104762	0	8342.57	0.291248	2.12665	0.00410539	0.31515	1.76615	8.30356	0.00152987
115	0	0.0144231	0.831731	0.153846	0	8339.55	0.215084	2.46643	0.00452606	0.240524	1.13584	8.58381	0.064036
115	0	0.00483092	0.748792	0.246377	0	8348.69	0.232749	2.45045	0.00839379	0.232686	0.957106	8.60822	0.0852407
115	0	0	0.995215	0.00478469	0	8332.3	0.179447	2.22603	0.000480769	0.201023	1.85557	8.38835	6.22511e-05
115	0	0	0.990431	0	0	8319.56	0.229396	2.34637	0.000240385	0.248183	3.81612	8.20004	0
115	0.057971	0.236715	0.318841	0.371981	0	8348.91	0.176294	2.36551	0.066243	0.0856428	0.41644	8.86457	0.145652
115	0.028436	0.0947867	0.658768	0.218009	0	8354.38	0.223701	2.36056	0.0157101	0.10646	0.624221	8.71288	0.124169
115	0	0	1	0	0	8375.05	0.448315	1.61532	0	0.492107	2.74774	7.00836	0
115	0	0	1	0	0	8359.88	0.452851	1.80953	0	0.512527	2.17692	7.87044	0
116	0	0.125604	0.816425	0.0483092	0	8180.94	0.0573824	1.06032	0.00469137	2.1452	5.14734	6.99861	0
116	0	0	1	0	0	8263.61	0.275335	1.21111	0	1.55117	6.65572	7.32638	0
116	0	0.00961538	0.961538	0.00961538	0	8113.14	0.0553861	2.06971	0.000961538	0.600074	3.91961	5.62595	0
116	0	0.0533981	0.81068	0.038835	0.00485437	8105.22	0.141091	2.37452	0.00561337	0.171176	4.50818	6.14513	0
116	0.0428571	0.0190476	0.585714	0.338095	0	8183.06	0.0883595	3.09635	0.014076	0.107206	6.01346	7.59136	0

## Sheet: Available
bird	irrigated agriculture	grassland	sagebrush	sagebrush/grassland	riparian	elevation	distance to water	water density	distance to sagebrush	distance to agriculture	distance to oil/gas roads	distance to well pads	energy development index
1	0	0.155172	0.163793	0.275862	0	8290.01	0.119807	2.77351	16.0177	0.0489758	0.654202	14.4772	0
1	0	0.0619469	0.486726	0.221239	0	8047.55	0.121761	1.26589	4.27266	0.0207614	0.264748	3.93226	0
1	0	0.280702	0.236842	0.438596	0.0438596	8432.32	0.118164	1.73004	16.3416	0.0380311	0.212009	15.2954	0
1	0	0.0869565	0.582609	0.156522	0	8258.02	0.0650521	2.96498	14.5789	0.0120159	0.260454	13.3468	0
1	0	0	0.982759	0.0172414	0	8080.19	0.0788914	1.27311	6.5649	0.000431034	2.19847	6.20324	0
1	0	0.00877193	0.947368	0.0263158	0	8539.78	0.215164	1.68004	10.7506	0.00154867	1.87581	10.1955	0
1	0	0.20354	0.309735	0.247788	0	8197.81	0.193785	2.08801	8.98209	0.0241836	1.50763	8.17182	0
1	0	0.123894	0.327434	0.327434	0	8232.41	0.361235	1.88673	9.26242	0.0335798	1.64292	8.59302	0
1	0	0	0.938596	0.0350877	0	8244.61	0.0765698	2.32832	11.3978	0.00230403	1.00249	10.7081	0
1	0	0.201754	0.640351	0.0964912	0	8021.19	0.0547883	1.32221	4.81949	0.0111749	0.734337	4.50712	0
1	0	0	0	0	0	8808.16	0.0658237	0.908077	16.6933	0.244971	0.809044	15.7681	0
1	0	0	1	0	0	8075.04	0.506575	1.42892	3.79888	0	0.424543	3.46387	0
1	0	0	0.95614	0.0263158	0	8257.61	0.12688	2.22508	11.1535	0.00153509	1.01943	10.4686	0
1	0	0.0603448	0.689655	0.163793	0	8284.49	0.111545	2.04084	11.1935	0.0102584	1.16275	10.5303	0
1	0	0.176991	0	0.504425	0.0530973	8879.8	0.426782	0.96631	17.3496	0.149953	1.012	16.2793	0
1	0	0	1	0	0	8074.5	0.952566	0.712263	3.43789	0	1.01184	3.16786	0
1	0	0	0.654867	0.345133	0	8035	0.0838048	1.48697	5.84446	0.0106774	1.8419	5.47898	0
1	0	0	0.921739	0.0782609	0	8073.33	0.3831	0.885824	6.27226	0.00118733	1.80938	5.8955	0
1	0.0535714	0.160714	0.241071	0	0.348214	8393.91	0.0462108	1.47762	16.4335	0.0709332	0.124204	15.4766	0
1	0	0	0.982456	0.0175439	0	8048.85	0.371692	1.23659	6.36266	0.000219298	2.125	5.45937	0
1	0	0	0.00869565	0.026087	0	8829.29	0.321194	0.845843	17.2781	0.155092	1.06226	16.3872	0
1	0	0.0973451	0.769912	0.132743	0	8257.68	0.0599999	2.02535	8.7782	0.00622834	1.37161	8.13894	0
1	0	0	1	0	0	8368.28	0.290341	1.66028	8.14069	0	0.846603	7.64476	0
1	0	0	0	0	0	8975.7	0.0721397	0.756277	17.682	0.17204	1.06493	16.3721	0
1	0	0.103448	0.482759	0.344828	0	8305.11	0.0875621	3.14349	15.2088	0.0173877	0.53289	13.6676	0
1	0	0.0614035	0.535088	0.368421	0	8312.05	0.083826	3.15287	15.1978	0.014609	0.529275	13.6474	0
1	0	0	1	0	0	8070.71	0.181512	0.970698	6.1793	0	1.81238	5.56083	0
1	0	0.286957	0.217391	0.2	0.00869565	8297.21	0.0879531	2.62321	16.0431	0.0502393	0.58456	14.6108	0
1	0	0.276786	0.0357143	0.642857	0	8579.28	0.0628885	1.8129	16.5318	0.0694991	0.376976	15.2821	0
1	0	0	0.0350877	0	0	8463.75	0.158035	1.31277	16.3805	0.0870699	0.25373	15.5167	0
1	0	0.0175439	0.789474	0.175439	0	8023.16	0.067344	1.3555	4.97117	0.00631619	0.883531	4.6598	0
1	0	0	0.956897	0.00862069	0	8363.18	0.0780298	1.89142	9.79055	0.00130435	1.55608	9.21502	0
1	0	0	1	0	0	8051.88	0.608793	1.0821	3.92856	0	0.319891	3.60586	0
1	0	0.0614035	0	0.5	0.0350877	8974.73	0.297585	0.985985	17.3758	0.152463	1.03533	16.221	0
1	0.278261	0.182609	0.217391	0	0	8322.32	0.0933769	1.9818	15.8299	0.0469922	0.0447815	14.9747	0
1	0	0	0.99115	0.00884956	0	8276.16	0.133268	1.90831	8.93896	0	1.13072	8.35617	0
1	0	0.115044	0.19469	0.300885	0	8278.03	0.228378	2.84827	15.8888	0.0487763	0.72952	14.3535	0
1	0	0.122807	0	0	0.184211	8558.79	0.368818	1.85439	16.8024	0.264074	0.167609	15.3029	0
1	0	0	1	0	0	8065.77	1.04358	0.615059	3.69553	0	1.28482	3.44176	0
1	0	0	0.867257	0.132743	0	8244.84	0.256591	2.14057	10.9375	0.00381784	1.10769	10.2583	0
1	0	0.191304	0.0521739	0.0695652	0	8248.11	0.0367331	2.99747	15.199	0.0628514	0.349375	13.8333	0
1	0	0.356522	0.373913	0.0347826	0.0434783	8244.61	0.052353	3.02951	14.9498	0.033047	0.153841	13.7259	0
1	0	0	0	0	0	8922.22	0.0626551	1.0406	17.4021	0.202377	0.940276	16.0814	0
1	0	0	0.603448	0.301724	0	8042.8	0.0895276	1.44643	5.72579	0.0165751	1.3147	5.40565	0
1	0	0	0.991379	0.00862069	0	8027.26	0.168646	1.39201	5.16596	0.000219298	1.09061	4.85757	0
1	0	0	0.525862	0.198276	0	8008.3	0.229125	1.22915	5.07024	0.0188779	1.50016	4.67153	0
1	0	0.172414	0.551724	0.215517	0	8235.75	0.277143	2.07553	10.7995	0.0160701	1.16697	10.1225	0
1	0	0	0.964912	0.0350877	0	8084.4	0.259682	0.876112	6.39463	0.000663717	1.85677	6.11634	0
1	0	0	0.947368	0.0526316	0	8306.53	0.0433447	1.85158	9.56816	0.00107759	1.48878	8.96895	0
1	0	0	1	0	0	8080.76	0.318378	0.850105	5.96983	0	1.47908	5.93646	0
1	0	0.0701754	0.614035	0.289474	0.00877193	8605.4	0.161517	1.44628	16.6627	0.0125047	0.387267	15.5547	0
1	0	0	0.964912	0.0350877	0	8072.41	0.426236	1.07158	6.43631	0.000884956	2.07238	5.67103	0
1	0	0	1	0	0	8047.06	0.501348	1.1227	4.02961	0	0.207422	3.70344	0
1	0	0	0.964602	0.00884956	0	8267.11	0.181489	2.04934	8.4022	0.00107759	1.76367	7.68437	0
1	0	0	0.982759	0	0	8521.38	0.175087	1.75659	10.6616	0.000434783	1.93116	10.1134	0
1	0	0	0.810345	0.189655	0	8044.43	0.114486	1.42875	5.85074	0.00778652	1.41714	5.53124	0
1	0	0	1	0	0	8334.16	0.572725	1.87082	8.10275	0	1.43146	7.47363	0
1	0	0.105263	0.473684	0.315789	0	8266.46	0.0794432	1.96384	11.3738	0.0207244	1.28045	10.7269	0
1	0	0.0353982	0.690265	0.141593	0	8264.69	0.0849907	2.99632	14.6161	0.00775909	0.273025	13.3545	0
1	0	0	1	0	0	8376.36	0.390569	1.73215	8.22078	0	0.876993	7.70654	0
1	0	0.150442	0.079646	0.504425	0	8315.16	0.0399525	2.1528	15.9984	0.0851543	0.267939	14.9165	0
1	0	0.00884956	0	0	0	8047.96	0.102409	1.58493	4.333	0.22524	0.490282	3.97986	0
1	0	0	1	0	0	8059.75	0.780049	1.06404	3.74966	0	0.516914	3.43185	0
1	0	0	1	0	0	8448.82	0.308548	2.04337	10.2627	0	1.68692	9.64339	0
1	0.0175439	0.219298	0	0.201754	0.166667	8547.02	0.295869	1.92978	16.6647	0.187062	0.146934	15.2293	0
1	0	0.026087	0.0173913	0.0521739	0	8867.31	0.0687696	0.848971	16.9196	0.138349	0.997892	15.9927	0
1	0	0	0.394737	0.131579	0	8055.12	0.187237	1.5637	4.00162	0.0337064	0.490047	3.65462	0
1	0	0	0.982301	0.0176991	0	8397.16	0.13429	1.94387	9.90639	0.000431034	1.35701	9.44131	0
1	0	0	1	0	0	8068.29	1.08709	0.630242	3.618	0	1.23238	3.36573	0
1	0	0	1	0	0	8036.34	0.811958	0.903811	3.85775	0	0.561677	3.54996	0
1	0.0344828	0.12931	0	0.318966	0	8315.64	0.0323727	1.99262	16.0372	0.111976	0.123019	15.0514	0
1	0	0.394737	0.105263	0.210526	0.0350877	8605.92	0.279413	1.21694	16.9759	0.0608161	0.638714	15.9084	0
1	0	0	1	0	0	8072.13	0.293301	1.44641	4.75283	0	0.424901	4.41601	0
1	0	0	0.543103	0.189655	0	8008.07	0.252005	1.23929	5.09454	0.0179388	1.54368	4.64351	0
2	0	0	0.724138	0.275862	0	8015.28	0.0491973	2.34322	2.74171	0.00651781	2.41445	2.79513	0
2	0	0	0.964912	0.0350877	0	8101.8	0.110049	3.15551	5.69988	0.00107759	0.609302	4.40012	0
2	0	0.221239	0.247788	0.460177	0	8162.77	0.0522229	2.84979	7.43314	0.029052	0.718961	6.37116	0
2	0.526316	0.0438596	0.307018	0.105263	0.0175439	8115.02	0.0552404	3.49166	3.39526	0.0362767	0.0226509	2.44723	0
2	1	0	0	0	0	8084.58	0.140736	2.73755	4.48878	0.920486	0	3.53787	0
2	0	0.0344828	0.37069	0.551724	0	7999.69	0.0327176	2.31449	3.53769	0.0280169	2.71759	3.58676	0
2	0.982759	0.0172414	0	0	0	8158.35	0.119788	3.53239	2.74674	0.36111	0.000431034	1.78956	0.000154054
2	1	0	0	0	0	8084.77	0.233005	3.74521	4.06995	0.261972	0	2.92221	0
2	0.905172	0.0862069	0.00862069	0	0	8128.8	0.195918	3.28994	3.91734	0.0888448	0.00237069	2.87497	0
2	0	0	1	0	0	8123.79	0.64834	0.92879	2.01066	0	1.29709	0.988025	0.693005
2	0	0	0.964286	0.0357143	0	8184.25	0.974565	1.00743	4.59761	0.000442478	0.998923	3.77604	0
2	1	0	0	0	0	8049.82	0.178316	3.12756	5.01892	0.772978	0	4.08397	0
2	1	0	0	0	0	8066.18	0.0915664	3.8169	5.10692	0.228918	0	4.06805	0
2	0	0	0.947368	0.0526316	0	8004.13	0.146007	2.40314	2.95057	0.00110619	1.779	3.00637	0
2	1	0	0	0	0	8043.06	0.162479	3.0544	5.14046	0.552604	0	4.30423	0
2	0.780702	0	0	0	0.219298	8023.13	0.0245895	3.88992	5.64312	0.314726	0.0058458	4.8762	0
2	1	0	0	0	0	8082.01	0.239902	3.56605	4.73038	0.425378	0	3.70392	0
2	0	0	0.946903	0.0353982	0	8101.83	0.0881868	3.14445	5.6936	0.00107759	0.633767	4.40302	0
2	1	0	0	0	0	8053.74	0.184528	4.13147	5.69175	0.265689	0	4.74156	0
2	0.626087	0.0521739	0.269565	0.0521739	0	8069	0.0583733	4.12968	5.42148	0.0733296	0.0224396	4.46601	0
2	0	0.168142	0.265487	0.504425	0	8166.47	0.0642766	2.66917	7.52305	0.0284052	0.826183	6.48498	0
2	0	0	0.991228	0.00877193	0	8181.69	0.254989	1.9753	5.56885	0.000215517	1.14265	4.56583	0
2	0.389381	0.106195	0.132743	0.0707965	0.132743	8095.3	0.0433497	3.41462	3.37989	0.0720811	0.0252545	2.0424	0
2	0.675439	0.0438596	0.236842	0.0438596	0	8068.77	0.0594801	4.11548	5.41213	0.0819559	0.0178385	4.44939	0
2	0	0	1	0	0	8112.97	0.0574606	2.75421	5.86984	0	1.11558	4.71023	0
2	0	0	1	0	0	8169.02	0.100831	1.88229	5.96155	0	1.52245	4.97695	0
2	0	0	0.657895	0.342105	0	8057.03	0.120348	1.98665	2.25716	0.00948332	3.00378	2.30708	0
2	0	0	1	0	0	8178.93	0.46598	1.10978	3.77793	0	0.437236	2.83228	0
2	0.991379	0.00862069	0	0	0	8143.78	0.243582	3.00905	3.47907	0.348806	0.000215517	2.48243	0
2	0	0	0.973214	0	0	8161.6	0.47746	1.00501	4.08014	0.000646552	0.415609	3.12843	0
2	0.807018	0.0789474	0.114035	0	0	8154.2	0.136547	3.50967	3.1321	0.114476	0.00823112	2.09609	0
2	0	0	0.974138	0.0258621	0	8181.35	0.293772	1.98146	5.50977	0.000442478	1.09334	4.50544	0
2	1	0	0	0	0	8112.38	0.0771109	2.96221	4.21943	0.75129	0	3.23473	0
2	0.33913	0.147826	0.408696	0.104348	0	8071.75	0.0353472	4.11729	5.07652	0.0346014	0.0499365	4.18342	0
2	1	0	0	0	0	8086.71	0.312636	3.46686	3.857	0.53453	0	2.89246	0
2	0	0	0.99115	0.00884956	0	8099.5	0.116581	3.06358	5.58365	0.000442478	0.412272	4.24673	0
2	0	0	1	0	0	8201.74	0.521864	0.777847	4.17501	0	1.04369	3.48242	0
2	1	0	0	0	0	8052.1	0.273852	3.24573	5.0202	0.719214	0	4.13893	0
2	0.948276	0.0517241	0	0	0	8139.03	0.0837914	3.14509	3.58095	0.443708	0.0012931	2.55507	0
2	0	0	1	0	0	8117.3	0.27208	2.60508	5.53175	0	0.811177	4.3718	0
2	0	0	0.905172	0.0948276	0	8147.1	0.393999	2.9986	8.15098	0.00224444	0.707905	7.05034	0
2	0.439655	0.206897	0.146552	0.206897	0	8099.83	0.0915258	3.65885	4.75961	0.0781752	0.0330008	3.76857	0
2	0	0	0.982456	0.0175439	0	8033.74	0.100693	2.05362	2.4675	0.000442478	2.17626	2.52291	0
2	0.745614	0.0263158	0.122807	0.105263	0	8139.82	0.181329	3.49117	3.45952	0.0938588	0.00968952	2.46305	0
2	0	0	0.947368	0.0526316	0	8017.56	0.0657631	2.20112	2.91679	0.000862069	1.69174	2.97267	0
2	0	0	0.105263	0.894737	0	8144.9	0.192334	2.73675	6.98729	0.0739128	0.557866	5.84798	0
2	0	0	1	0	0	8234.67	0.428988	1.53448	5.71635	0	1.57283	4.84707	0
2	0	0	1	0	0	8107.11	0.0719715	2.80895	5.73831	0	0.923563	4.54498	0
2	0.448276	0.0344828	0.431034	0.0172414	0	8080.16	0.0697103	1.38199	4.20854	0.0291738	0.035281	3.03932	0
2	0	0	1	0	0	8221.73	0.616388	1.32326	5.41305	0	1.45099	4.58415	0
2	1	0	0	0	0	8096.46	0.153273	2.90399	4.40263	0.938917	0	3.43933	0
2	0	0	1	0	0	8220.68	0.744755	1.25814	5.25119	0	1.36154	4.42803	0
2	1	0	0	0	0	8094.45	0.205782	3.293	3.50679	0.4859	0	2.58787	0
2	0	0	0.707965	0.292035	0	7982.34	0.150666	2.68056	3.40022	0.0120325	1.44571	3.45599	0
2	0.95614	0	0.0263158	0.0175439	0	8103.42	0.0560944	3.05335	3.06979	0.117647	0.00109649	1.61053	0.00777816
2	0	0	0.964602	0.0353982	0	8180.18	0.876279	0.923691	4.47066	0.000434783	0.851454	3.62566	0
2	1	0	0	0	0	8039.2	0.0926142	3.0672	5.10501	0.38845	0	4.43891	0
2	1	0	0	0	0	8071.07	0.0729441	2.73392	4.56201	0.842243	0	3.62033	0
2	0.482456	0.166667	0.210526	0	0.0877193	8080.02	0.0453206	1.56254	4.62084	0.0460058	0.0231441	3.40053	0
2	1	0	0	0	0	8107.46	0.0411991	3.32991	4.35661	0.47113	0	3.32553	0
2	0	0	0.99115	0.00884956	0	8014.19	0.0483949	2.3784	3.09267	0	2.56403	3.14364	0
2	0	0	0.982609	0.0173913	0	8039.7	0.207138	2.06551	2.70797	0.000438596	2.87838	2.75736	0
2	0.769912	0.0884956	0.106195	0.0353982	0	8063.8	0.0967247	4.21266	5.58115	0.0983788	0.00808478	4.66597	0
2	0	0	1	0	0	8185.28	1.03847	1.17045	4.73922	0	1.04138	3.89776	0
2	0	0	1	0	0	8139.39	0.0411134	2.26727	6.04788	0	1.42186	4.99424	0
2	1	0	0	0	0	8100.16	0.179662	3.15593	3.26655	0.454314	0	2.35486	0
2	0	0	0.893805	0.106195	0	8009.81	0.0438622	2.28642	3.19023	0.00267548	2.75114	3.2395	0
2	1	0	0	0	0	8074.95	0.332247	3.50973	4.84809	0.680338	0	3.84381	0
2	0	0	1	0	0	8196.27	0.347372	0.933546	3.64122	0	0.720331	2.82786	0
2	0.324561	0.0877193	0.289474	0.184211	0	8119.22	0.0938821	3.45601	3.61299	0.039469	0.0358423	2.65141	0
2	1	0	0	0	0	8082.93	0.239916	3.72659	4.12043	0.257359	0	2.97975	0
2	0	0	0.965217	0	0	8113.21	0.18695	3.29048	6.04918	0.000877193	1.05462	4.82018	0
2	0.603448	0.0431034	0.310345	0.0431034	0	8067.61	0.0587989	4.22007	5.5054	0.0589648	0.0251662	4.58425	0
2	0	0	1	0	0	8138.16	0.669209	1.19748	4.62539	0	0.637922	3.64857	0
2	0	0	1	0	0	8200.16	0.752149	0.783986	4.40888	0	1.0819	3.68196	0
2	1	0	0	0	0	8112.46	0.0961255	3.05713	4.24722	0.701826	0	3.25274	0
2	1	0	0	0	0	8076.96	0.0826664	2.9897	4.04097	0.616891	0	3.15631	0
2	1	0	0	0	0	8122.19	0.233229	2.7696	4.04383	0.622525	0	3.05187	0
2	1	0	0	0	0	8107.5	0.0438095	3.06908	3.43677	0.158149	0	2.55113	0
2	0.991304	0.00869565	0	0	0	8046.25	0.0763663	3.91456	5.54437	0.438259	0.000217391	4.50764	0
2	0	0	0.982301	0.0176991	0	8169.5	0.622427	1.66115	5.16522	0.000438596	0.918219	4.19859	0
2	0.448276	0.00862069	0.37931	0.12931	0	8116.26	0.105285	3.24372	4.12548	0.0356904	0.0250325	3.17791	0
3	1	0	0	0	0	8203.04	0.0285366	5.52036	4.47102	0.368661	0	1.4579	0.0287028
3	1	0	0	0	0	8335.03	0.161742	2.35493	10.3774	0.526129	0	5.16861	0
3	0	0.0172414	0.405172	0.431034	0	8716.71	0.732393	1.06559	8.78682	0.0270945	0.695085	2.21831	0
3	0	0	1	0	0	8461.17	0.667443	1.4597	7.42225	0	0.833942	1.27584	0.190787
3	0.79646	0.123894	0.0265487	0	0	8256.26	0.0892237	1.97425	7.42709	0.127168	0.00536342	2.61604	0
3	0.619469	0.345133	0	0.0353982	0	8247.61	0.203378	2.39975	7.14356	0.292516	0.0122252	2.37153	0
3	1	0	0	0	0	8200.55	0.0946353	5.61363	3.36151	0.38002	0	1.35267	0.0558721
3	0.741379	0.155172	0.0517241	0.0517241	0	8353.61	0.138077	4.72652	7.18727	0.104235	0.011764	2.62468	0
3	0	0	0.974138	0	0	8285.37	0.355468	2.98205	6.25434	0.000646552	0.414941	3.11204	0
3	0.912281	0.0438596	0	0.0438596	0	8368.28	0.0644566	1.94494	10.6306	0.423496	0.00228382	5.3975	0
3	0.0175439	0.122807	0	0	0	8556.84	0.309393	1.17945	11.207	0.207368	0.128024	6.47094	0
3	0.741379	0.0603448	0.0775862	0.103448	0.00862069	8366.38	0.0813505	2.88953	9.60482	0.0569497	0.00887791	4.24141	0
3	0	0.191304	0.756522	0.0434783	0.00869565	8132.83	0.0898594	2.97636	3.8191	0.00835902	0.190208	1.21759	0.0833284
3	0	0	0.964912	0.00877193	0	8381.15	0.410852	0.632485	1.13531	0.000646552	1.61818	0.0658984	1.91951
3	0	0	0.973684	0.0263158	0	8266.57	0.349637	1.07521	5.18359	0.000884956	0.465917	2.94591	0
3	0.345133	0.150442	0.106195	0.380531	0	8410.63	0.040895	1.59195	8.91911	0.0558051	0.0298421	4.37921	0
3	0	0	0.974138	0.0258621	0	8270.31	0.252076	1.66962	4.86983	0.000657895	0.617809	0.665108	0.159777
3	1	0	0	0	0	8120.17	0.113445	3.23752	4.7624	0.217454	0	0.171314	0.0925943
3	1	0	0	0	0	8169.16	0.0337968	6.17103	2.86414	0.467034	0	1.01079	0.0970049
3	0.877193	0	0	0	0.122807	8145.03	0.0605209	3.33236	5.28548	0.281888	0.00307018	1.08755	0.0770041
3	0	0	1	0	0	8272.62	0.901258	1.32644	4.67666	0	0.932653	2.11612	0
3	0	0	0.947368	0.0526316	0	8524.45	0.482349	1.57172	5.36894	0.00110619	0.603197	1.31702	0.0752584
3	0	0.350877	0.219298	0.201754	0.0263158	8582.32	0.260969	1.73596	7.514	0.0647615	0.522657	3.10498	0
3	0.373913	0.347826	0.0608696	0.0608696	0	8458.83	0.0884993	1.47941	10.4278	0.0682106	0.0271067	4.03059	0
3	0	0	1	0	0	8428.22	0.17837	0.662028	3.8958	0	0.869423	1.1682	0.189819
3	0.807018	0.0877193	0.0263158	0	0	8263.85	0.0505242	2.04196	7.44483	0.10748	0.00531637	2.6529	0
3	0	0	1	0	0	8276.01	0.14309	6.35194	2.37622	0	0.425607	1.05408	0.135138
3	0.876106	0	0	0	0.123894	8197.37	0.0343296	3.29665	7.31135	0.263964	0.00341022	3.23746	0
3	0.0442478	0.0265487	0.743363	0.185841	0	8384.33	0.0567986	2.75625	5.89082	0.00588343	0.130401	1.73685	0.00397418
3	0	0.0258621	0.732759	0.241379	0	8447.6	0.209869	1.46207	6.80603	0.0086491	0.536967	3.36634	0
3	0	0.0608696	0	0.0521739	0.0782609	8482.82	0.161998	1.47578	7.15492	0.180126	0.699743	3.04524	0
3	0	0	0.913793	0.0862069	0	8332.46	0.115356	1.35269	6.42066	0.00237069	0.51519	1.81198	8.2703e-06
3	0	0	1	0	0	8228.82	0.0560272	2.49433	1.87383	0	0.894345	1.70178	0.011392
3	1	0	0	0	0	8164.23	0.174147	3.07869	6.45172	0.49983	0	1.80174	0.000203963
3	0	0.0714286	0.75	0.178571	0	8441.18	0.853571	1.06198	0.965814	0.00756638	1.28233	0.237771	1.66256
3	0	0.0869565	0.565217	0.347826	0	8400.78	0.315975	1.49603	5.94529	0.0113438	0.65234	1.20906	0.0642063
3	0.215517	0.396552	0.146552	0.232759	0	8293.6	0.168175	3.16721	7.19457	0.0718046	0.0437294	2.78132	0
3	0.637931	0.0775862	0.0258621	0.12069	0.12069	8201.18	0.0280378	5.98167	3.39411	0.127844	0.0157887	1.78299	0
3	0.192982	0.421053	0.157895	0.22807	0	8222.65	0.0392331	3.16725	6.86781	0.05928	0.050525	3.08554	0
3	0.596491	0.201754	0	0.131579	0	8278.5	0.177035	2.87553	8.72347	0.245142	0.0123495	4.5306	0
3	0	0	0.894737	0.105263	0	8452.12	0.658313	0.988061	1.60282	0.00248731	1.1799	0.190877	1.54346
3	0.912281	0	0	0	0.0877193	8209.29	0.0373164	3.46009	7.61835	0.331534	0.00219298	3.65658	0
3	0.0775862	0.12931	0.767241	0.0258621	0	8271.62	0.0424525	3.51668	3.60362	0.00916905	0.0773133	0.928684	0.0330166
3	0.422414	0.275862	0.0775862	0.137931	0.00862069	8500.87	0.0701642	1.1913	11.3344	0.0575733	0.0248277	5.96813	0
3	0	0	0.913793	0.0862069	0	8224.74	0.204476	1.3448	5.16872	0.00219298	0.693481	2.90375	0
3	0.0521739	0.226087	0.13913	0.486957	0	8545.15	0.238787	1.18564	11.0106	0.0609494	0.0652468	4.4922	0
3	0	0	1	0	0	8163.24	0.265447	2.3404	3.78911	0	0.295338	1.66229	0.0078743
3	0	0	0.947368	0.0526316	0	8307.64	0.351866	2.42659	6.15571	0.00159789	0.358453	3.3168	0
3	0	0	1	0	0	8313.22	0.480326	1.67276	5.46467	0	0.918144	0.690635	0.142878
3	0	0	0.780702	0.219298	0	8502.25	0.351702	0.695657	5.85898	0.00653611	0.885861	2.75516	0
3	0	0	0.902655	0.0973451	0	8195.87	0.0591469	2.72625	1.93991	0.00248135	0.548424	1.73343	0.0161207
3	0.938596	0	0	0	0.0438596	8194.99	0.0212253	5.71775	3.95986	0.273342	0.00153509	1.61627	0.00873997
3	0	0.0173913	0.956522	0.026087	0	8335.06	0.156823	1.52601	5.82055	0.000877193	0.193725	3.24318	0
3	0	0	0.982301	0.0176991	0	8448.47	0.27772	1.88243	7.26771	0.000431034	0.287987	1.63115	0.0374238
3	0.903509	0.0701754	0.0263158	0	0	8262.21	0.0618459	3.08253	9.05192	0.139	0.00277563	5.07802	0
3	0.141593	0.0530973	0.79646	0.00884956	0	8292.3	0.0770667	4.64065	2.73296	0.00810326	0.0890697	1.51987	0.0218294
3	0	0	1	0	0	8325.98	0.0937291	3.78567	4.02235	0	0.43937	0.713148	0.0330166
3	0	0	0.982759	0	0	8266.86	0.0572062	1.35954	4.88278	0.000431034	1.18103	0.133829	0.159777
3	1	0	0	0	0	8294.91	0.0236409	4.23932	6.37412	0.410844	0	2.74719	0
3	0.973451	0	0	0	0.0265487	8196.32	0.0455674	3.24324	7.24044	0.232071	0.000663717	3.1426	0
3	0	0.0446429	0.875	0.0803571	0	8401.12	0.140901	1.12239	6.78363	0.00362682	0.606728	1.94165	0
3	0.696429	0.0714286	0.0535714	0.0714286	0.107143	8186.54	0.0168081	6.07864	2.92873	0.105515	0.0102966	1.39061	0.0666528
3	0.698276	0.0775862	0.0258621	0.198276	0	8203.47	0.126339	3.41885	2.75175	0.095847	0.0113902	1.60669	0.0159023
3	0	0.173913	0.782609	0.026087	0	8397.11	0.273934	1.34896	7.14588	0.00637255	0.912472	1.5321	0.0645872
3	0	0.149123	0.842105	0.00877193	0	8442.84	0.209938	0.941007	4.44826	0.00506534	1.31786	1.04975	0.146056
3	0.801724	0.0258621	0.0775862	0.0948276	0	8279.79	0.0287587	3.15181	9.1395	0.0992298	0.00814208	5.19247	0
3	1	0	0	0	0	8156.07	0.0552193	3.39783	5.91889	0.282665	0	1.44434	0.0359371
3	0.474138	0.0948276	0.206897	0.103448	0.103448	8167.61	0.0555275	3.3448	5.94358	0.0659499	0.0255612	1.85865	0
3	0.0344828	0.112069	0.0431034	0.0431034	0	8491.9	0.208762	1.16853	10.3605	0.0752692	0.118049	6.20339	0
3	0	0.00884956	0.982301	0	0	8356.18	0.0487934	1.72701	2.48408	0.000431034	0.781683	0.70323	0.265163
3	0.105263	0.157895	0.631579	0.105263	0	8221.93	0.0224463	6.18908	2.81702	0.0171336	0.100279	1.43972	0.0733618
3	1	0	0	0	0	8145.6	0.0825556	3.30279	5.16531	0.41494	0	0.778084	0.0925943
3	0.991379	0	0	0	0.00862069	8175.74	0.025997	6.08966	3.12376	0.375524	0.000215517	1.28864	0.105261
3	1	0	0	0	0	8126.94	0.25207	3.25986	4.52914	0.411033	0	0.58087	0.0925943
3	0.859649	0.0175439	0	0	0.122807	8187.05	0.035248	6.03574	3.13119	0.204972	0.00350877	1.55839	0.0329225
3	0	0	0.973684	0.0263158	0	8261.15	0.191942	1.66107	4.86519	0.000646552	0.696094	0.584849	0.159777
3	0	0	1	0	0	8367.91	0.205024	0.818248	1.04046	0	1.36289	0.226394	1.72831
3	0	0	0.587719	0.394737	0	8237.32	0.112275	3.34011	6.87463	0.0116384	0.300932	3.32244	0
3	1	0	0	0	0	8158.87	0.0673293	2.70988	6.01101	0.191517	0	1.22523	0.0876545
3	0	0	0.0884956	0	0	8664.42	0.212113	1.19946	10.0872	0.0716813	0.580781	3.34853	0
3	0.366071	0.0892857	0.508929	0.0357143	0	8283.35	0.121489	3.39943	8.73577	0.0276716	0.0438088	4.94696	0
3	0.655172	0.137931	0.0517241	0.112069	0	8269.64	0.0562051	3.03926	8.48881	0.0734496	0.0115514	4.33931	0
3	0.391304	0.13913	0.382609	0.0782609	0.00869565	8234.85	0.0491973	3.3365	7.14318	0.0392277	0.0434771	3.25537	0
3	1	0	0	0	0	8172.88	0.0174645	6.11359	2.99144	0.445921	0	1.16243	0.102481
3	0	0.0526316	0.877193	0.0701754	0	8245.13	0.347824	2.7546	5.99545	0.00316101	0.610589	2.96758	0
3	0	0	1	0	0	8210.74	0.0966994	3.12196	1.45015	0	0.641089	1.26539	0.311049
3	0	0	1	0	0	8253.6	0.310186	3.00382	3.26483	0	0.360723	1.64643	0.00962694
3	0.0619469	0.238938	0.584071	0.079646	0	8247.9	0.100071	3.65824	7.69514	0.0141262	0.0707586	4.07562	0
3	1	0	0	0	0	8400.68	0.360454	2.73639	6.96756	0.400728	0	2.1852	0
3	0	0	0.964286	0.0357143	0	8326.55	0.352073	1.54243	5.43775	0.000884956	1.06782	0.687192	0.137372
3	0	0	1	0	0	8179.08	0.597897	1.8817	4.17996	0	0.840022	2.4547	0
3	0.568966	0.336207	0.0344828	0	0	8294.66	0.138491	2.5183	9.84118	0.119363	0.0142936	5.87484	0
3	0	0.0431034	0.853448	0.103448	0	8310.09	0.0427108	4.07595	4.08493	0.00400058	0.295074	0.258641	0.0330166
3	0	0	1	0	0	8345.33	0.613582	1.04798	5.13147	0	0.741393	2.34999	0
3	0	0.142857	0.571429	0.285714	0	8214.47	0.037459	3.01655	5.86338	0.0162612	0.422541	2.51505	0
3	0	0.0526316	0.622807	0.324561	0	8305.86	0.285027	1.59959	5.96017	0.0099007	0.260872	0.983591	0.0925943
3	1	0	0	0	0	8264.16	0.0400732	3.23152	8.89644	0.276604	0	5.01804	0
3	0.0707965	0.19469	0.566372	0.0707965	0	8263.59	0.0406834	3.42716	7.32098	0.0136277	0.0744818	4.1109	0
3	0	0	0.956897	0.0431034	0	8506.29	0.535289	1.43288	5.2002	0.00109649	0.768595	1.28253	0.0846332
3	0	0	0.982609	0.0173913	0	8321.2	0.574435	1.66189	5.57404	0.000434783	0.723029	0.808438	0.132645
3	0	0	1	0	0	8361.1	0.181135	1.01496	4.53642	0.000221239	1.46216	0.614203	0.17804
3	0	0	1	0	0	8185.11	0.0905298	5.32782	1.76332	0	0.202098	0.772794	0.232426
3	0	0.0530973	0.79646	0.150442	0	8195.69	0.0213548	3.00505	2.19181	0.00483536	0.312548	1.87675	0
3	0	0	0.99115	0.00884956	0	8287.14	0.231126	1.82542	5.91259	0	0.372175	3.47178	0
3	0.938596	0.0350877	0	0	0.0263158	8210.36	0.101048	3.38637	7.54856	0.416079	0.00153509	3.48172	0
3	0.123894	0.274336	0.477876	0.0973451	0	8248.19	0.13473	3.64182	7.6364	0.0192076	0.0582206	4.06566	0
3	1	0	0	0	0	8433.3	0.179093	2.09427	10.4197	0.110074	0	4.44133	0
3	0	0.0862069	0.62069	0.189655	0.00862069	8173.89	0.126618	3.14465	5.45918	0.0116135	0.134152	1.5546	0.0150767
3	1	0	0	0	0	8159.54	0.017795	6.32633	2.68749	0.441394	0	0.8413	0.0973477
3	0	0.0258621	0.474138	0.12069	0	8749.96	0.542269	1.17994	9.11147	0.0182016	0.745788	2.68804	0
3	0	0	0.377193	0.149123	0	8785.28	0.918728	0.760883	6.63194	0.0206866	1.40857	2.67267	0
3	0.163793	0.603448	0.12069	0.0862069	0	8316.62	0.0506708	3.05222	8.73258	0.0823155	0.0907042	4.0452	0
3	0	0.0884956	0.672566	0.141593	0.0176991	8375.6	0.0340851	1.73587	6.3434	0.0108804	0.257804	1.57065	0.0124561
3	0	0.166667	0.815789	0.0175439	0	8298.08	0.0812824	3.41815	7.81451	0.00606511	0.150518	4.50508	0
3	0	0	0.929204	0.0707965	0	8398.14	0.226864	2.44052	6.25759	0.00175439	0.28815	1.61395	0.0112259
3	0.394737	0.131579	0.368421	0.105263	0	8202.38	0.0593514	3.2892	2.62054	0.0442128	0.0434363	1.82056	4.04246e-05
3	0.424779	0.256637	0.0176991	0.150442	0.00884956	8407.17	0.0834441	1.22216	10.1535	0.107322	0.0231427	5.93461	0
3	1	0	0	0	0	8230	0.147668	3.85093	4.79657	0.407159	0	0.582135	0.318233
3	0	0	0.982759	0.0172414	0	8368.88	0.33082	0.904136	1.51441	0.000442478	1.84669	0.0397552	1.44171
3	0.793103	0.12069	0.0172414	0.0689655	0	8127.86	0.138646	3.29153	4.8431	0.126108	0.0078234	0.0880511	0.0925943
3	1	0	0	0	0	8151.48	0.0568094	3.39038	5.58654	0.342221	0	1.03893	0.0887264
3	1	0	0	0	0	8208.25	0.180869	5.15733	4.18935	0.657156	0	1.01002	0.201562
3	0.911504	0.0884956	0	0	0	8219.53	0.111366	2.04565	7.18059	0.218446	0.00261691	2.33158	0
3	0.793103	0.0172414	0.0517241	0.12069	0	8222.8	0.0498546	3.61519	7.52025	0.112965	0.00864357	3.70591	0
3	0.725664	0.0530973	0	0.00884956	0.19469	8196.47	0.0248356	5.92591	3.47304	0.174122	0.00817642	1.76675	0
3	1	0	0	0	0	8230.01	0.0859667	4.70063	4.94095	0.871585	0	1.08932	0.373459
3	0	0	1	0	0	8394.2	0.742863	1.04294	0.742019	0	1.19975	0.0810202	1.69159
3	0.232143	0.232143	0.241071	0.0982143	0.0178571	8165.74	0.0269164	4.73409	1.11586	0.0410021	0.0372776	0.330271	0.366373
3	1	0	0	0	0	8179.31	0.0265998	5.90151	3.35916	0.243023	0	1.19171	0.0991006
3	0	0	0	0	0.0714286	8838.78	0.668988	1.00455	8.16294	0.222756	0.964998	2.3328	0
3	0.913793	0.0258621	0	0	0.0258621	8185.68	0.0239488	6.06952	3.24989	0.147439	0.00215517	1.51164	0.0628405
3	0.95614	0	0	0	0.0263158	8168.03	0.0304674	6.20273	2.53059	0.205858	0.00109649	0.776202	0.121382
3	0.415929	0.265487	0.0265487	0.221239	0	8250.51	0.0761809	2.68772	7.88159	0.100296	0.0266599	3.31916	0
3	0.0517241	0.258621	0.0775862	0.0344828	0.0431034	8404.54	0.131268	1.58215	10.1753	0.0671686	0.0812845	6.0638	0
3	0.460177	0.486726	0	0.0353982	0	8279.32	0.124465	3.08038	7.88721	0.348605	0.0151137	3.49236	0
3	0.929825	0	0	0.0701754	0	8298.05	0.0457234	3.10885	9.35471	0.34751	0.00184522	4.8945	0
3	0	0.359649	0.45614	0.184211	0	8194.69	0.306295	3.00921	5.60757	0.0189347	0.456243	2.1111	0
3	0.219298	0.157895	0.350877	0.210526	0	8155.93	0.180617	3.27311	5.21573	0.0320394	0.0657462	0.37245	0.0925943
3	1	0	0	0	0	8207.03	0.0283334	5.53157	4.65691	0.387139	0	1.45654	0.0335751
3	1	0	0	0	0	8482.73	1.11653	0.185192	12.5868	0.711106	0	6.04092	0
3	0.801724	0.0172414	0	0	0.181034	8334.86	0.0308903	5.11146	7.2526	0.317696	0.00522471	2.80637	0
3	0.236842	0.0526316	0.403509	0.114035	0.122807	8166.7	0.0733117	3.23419	5.5534	0.0323146	0.0587961	1.54006	0.0169548
3	1	0	0	0	0	8200.22	0.108692	5.51723	3.44925	0.361678	0	1.21902	0.0656857
3	0	0.172414	0.5	0.327586	0	8182.12	0.259201	2.54456	5.01605	0.0200191	0.465451	1.78619	0.000198702
3	0	0.0517241	0.0775862	0.594828	0.0172414	8816.1	0.694122	0.798012	7.51932	0.0946665	1.1982	2.34899	0
3	0.265487	0.212389	0.0530973	0.0707965	0.132743	8432.16	0.0659115	1.40602	10.8627	0.0858315	0.0290238	6.34028	0
3	1	0	0	0	0	8169.53	0.030855	6.17642	2.85482	0.481474	0	1.0082	0.0969632
3	0.869565	0.026087	0	0	0.104348	8298.03	0.0266064	4.37476	6.57294	0.340313	0.00326087	2.83915	0
3	0	0	1	0	0	8322.94	0.320154	1.58661	5.85829	0	0.483686	1.12373	0.0806293
3	0	0.265487	0.610619	0.123894	0	8416.86	0.189087	0.943254	4.33436	0.0157594	1.32391	0.959342	0.176374
3	0	0	0.973451	0.0265487	0	8270.5	0.200345	3.31843	6.92013	0.000657895	0.22244	3.60319	0
3	0	0	1	0	0	8284.55	0.262209	2.98249	6.39981	0	0.262467	3.25775	0
3	0	0.456897	0.215517	0.327586	0	8361.59	0.0744663	2.95125	8.5303	0.0398582	0.27189	3.86955	0
3	1	0	0	0	0	8209.47	0.18532	5.0821	4.16055	0.575588	0	0.955424	0.20186
3	0.964602	0.0265487	0.00884956	0	0	8299.47	0.0253502	2.8586	9.76403	0.118262	0.000884956	5.28157	0
3	0	0.133929	0.803571	0.0625	0	8253.54	0.20507	3.68257	4.21532	0.00566413	0.198397	0.911316	0.108798
3	0.973913	0	0.026087	0	0	8307.61	0.0769066	2.58894	9.94684	0.142975	0.000652174	5.74628	0
3	1	0	0	0	0	8391.61	0.17521	3.71599	7.11182	0.534643	0	2.3687	0
3	0	0	0.719298	0.140351	0	8809.21	0.619607	0.791489	6.51397	0.00772164	1.27398	2.98637	0
[truncated: 9,519 more rows]
